# Supplementary material for: El secreto judicial y las garantías constitucionales del derecho a un proceso debido
Source: MDPI journal article supplement (doi:10.3390/life11090886), 1988-01-01
Supplement: s1 [file s1]

**Supplementary Table S8.** Enrichment analysis for genes located at genomic cluster 20q11.22.

| Genes on 20q11.22 (5'→3') | Full gene name (HGNC)                        | Enriched terms (Biological Process/Molecular Function/Pathways), associated adjusted P-values*                                     |
|---------------------------|----------------------------------------------|------------------------------------------------------------------------------------------------------------------------------------|
| NECAB3                    | N-terminal EF-hand calcium binding protein 3 | regulation of amyloid precursor protein biosynthetic process (GO:0042984), P=0.003                                                 |
|                           |                                              | regulation of glycoprotein biosynthetic process (GO:0010559), P=0.003                                                              |
| ACTL10                    | actin like 10                                | Salivirus NG-J1 3D, Host PPI P-HIPSTer 2020, P=0.008                                                                               |
|                           |                                              | Ectromelia virus ERPV profilin-like protein, Host PPI P-HIPSTer 2020, P=0.008                                                      |
|                           |                                              | Variola virus hypothetical protein (gene: A47R), Host PPI P-HIPSTer 2020, P=0.008                                                  |
|                           |                                              | Horsepox virus HSPV164 (Profilin), Host PPI P-HIPSTer 2020, P=0.008                                                                |
|                           |                                              | Monkeypox virus profilin-like protein, Host PPI P-HIPSTer 2020, P=0.008                                                            |
|                           |                                              | Monkeypox virus Zaire-96-I-16 A42R (gene: A42R), Host PPI P-HIPSTer 2020, P=0.008                                                  |
|                           |                                              | Cowpox virus CPXV179 protein (gene: CPXV179 CDS), Host PPI P-HIPSTer 2020, P=0.008                                                 |
|                           |                                              | Vaccinia virus profilin-like protein (gene: A42R), Host PPI P-HIPSTer 2020, P=0.008                                                |
| E2F1                      | E2F transcription factor 1                   | Vaccinia virus Ankara Profilin-1-like, Host PPI P-HIPSTer 2020, P=0.008                                                            |
|                           |                                              | regulation of fat cell proliferation (GO:0070344), P=0.002                                                                         |
|                           |                                              | RNA stabilization (GO:0043489), P=0.006                                                                                            |
|                           |                                              | regulation of cell cycle G1/S phase transition (GO:1902806), P=0.008                                                               |
|                           |                                              | regulation of transcription involved in G1/S transition of mitotic cell cycle (GO:0000083), P=0.009                                |
|                           |                                              | positive regulation of fibroblast proliferation (GO:0048146), P=0.010                                                              |
|                           |                                              | positive regulation of protein insertion into mitochondrial membrane involved in apoptotic signaling pathway (GO:1900740), P=0.010 |
|                           |                                              | regulation of protein insertion into mitochondrial membrane involved in apoptotic signaling pathway (GO:1900739), P=0.010          |
|                           |                                              | negative regulation of nucleic acid-templated transcription (GO:1903507), P=0.010                                                  |
|                           |                                              | negative regulation of fat cell differentiation (GO:0045599), P=0.011                                                              |
|                           |                                              | mRNA stabilization (GO:0048255), P=0.011                                                                                           |
|                           |                                              | negative regulation of DNA binding (GO:0043392), P=0.012                                                                           |
|                           |                                              | positive regulation of mitochondrial outer membrane permeabilization involved in apoptotic signaling pathway (GO:1901030), P=0.013 |
|                           |                                              | negative regulation of G0 to G1 transition (GO:0070317), P=0.013                                                                   |
|                           |                                              | DNA damage checkpoint (GO:0000077), P=0.013                                                                                        |
|                           |                                              | negative regulation of cellular macromolecule biosynthetic process (GO:2000113), P=0.013                                           |
|                           |                                              | regulation of G0 to G1 transition (GO:0070316), P=0.014                                                                            |
|                           |                                              | regulation of transcription, DNA-templated (GO:0006355), P=0.014                                                                   |
|                           |                                              | regulation of fibroblast proliferation (GO:0048145), P=0.016                                                                       |
|                           |                                              | regulation of G1/S transition of mitotic cell cycle (GO:2000045), P=0.016                                                          |
|                           |                                              | intrinsic apoptotic signaling pathway in response to DNA damage (GO:0008630), P=0.017                                              |
|                           |                                              | regulation of nucleic acid-templated transcription (GO:1903506), P=0.017                                                           |
|                           |                                              | regulation of DNA binding (GO:0051101), P=0.018                                                                                    |
|                           |                                              | negative regulation of gene expression (GO:0010629), P=0.018                                                                       |
|                           |                                              | regulation of cellular macromolecule biosynthetic process (GO:2000112), P=0.019                                                    |
|                           |                                              | diterpenoid metabolic process (GO:0016101), P=0.022                                                                                |
|                           |                                              | DNA damage response, signal transduction by p53 class mediator resulting in cell cycle arrest (GO:0006977), P= 0.022               |
|                           |                                              | signal transduction involved in mitotic G1 DNA damage checkpoint (GO:0072431), P=0.022                                             |
|                           |                                              | regulation of fat cell differentiation (GO:0045598), P=0.025                                                                       |
|                           |                                              | retinoid metabolic process (GO:0001523), P=0.026                                                                                   |
|                           |                                              | nucleic acid-templated transcription (GO:0097659), P=0.026                                                                         |
|                           |                                              | negative regulation of cell cycle process (GO:0010948), P=0.028                                                                    |
|                           |                                              | positive regulation of cell cycle arrest (GO:0071158), P= 0.028                                                                    |
|                           |                                              | negative regulation of binding (GO:0051100), P=0.028                                                                               |
|                           |                                              | DNA damage response, signal transduction by p53 class mediator (GO:0030330), P=0.028                                               |
|                           |                                              | negative regulation of transcription, DNA-templated (GO:0045892), P=0.030                                                          |
|                           |                                              | positive regulation of protein localization to membrane (GO:1905477), P=0.033                                                      |
|                           |                                              | intrinsic apoptotic signaling pathway (GO:0097193), P=0.035                                                                        |
|                           |                                              | G1/S transition of mitotic cell cycle (GO:0000082), P=0.036                                                                        |
|                           |                                              | positive regulation of establishment of protein localization to mitochondrion (GO:1903749), P=0.038                                |
|                           |                                              | regulation of mRNA stability (GO:0043488), P=0.044                                                                                 |
|                           |                                              | regulation of gene expression (GO:0010468), P=0.047                                                                                |
|                           |                                              | retinol binding (GO:0019841), P=0.002                                                                                              |
|                           |                                              | retinoid binding (GO:0005501), P=0.008                                                                                             |

|            |                                              |                                                                                                                                                                                                                                                                                                                                                                                                                                                                                                                                                                                                                                                                                                                                                                                                                                                                                                                                                                                                                                                                                                                                                                                                                                                                                                                                                                                                                                                                                                                                                                                                                                                                                                                                                                                                                                                                                                                                                                                                                                                                                                                                                                                                                                                                                                                                                                                                                                                                                                                                                                                                                                                                                                                                                                                                                                                                                                                                                                                                                                                                                                                                                                                   |
|------------|----------------------------------------------|-----------------------------------------------------------------------------------------------------------------------------------------------------------------------------------------------------------------------------------------------------------------------------------------------------------------------------------------------------------------------------------------------------------------------------------------------------------------------------------------------------------------------------------------------------------------------------------------------------------------------------------------------------------------------------------------------------------------------------------------------------------------------------------------------------------------------------------------------------------------------------------------------------------------------------------------------------------------------------------------------------------------------------------------------------------------------------------------------------------------------------------------------------------------------------------------------------------------------------------------------------------------------------------------------------------------------------------------------------------------------------------------------------------------------------------------------------------------------------------------------------------------------------------------------------------------------------------------------------------------------------------------------------------------------------------------------------------------------------------------------------------------------------------------------------------------------------------------------------------------------------------------------------------------------------------------------------------------------------------------------------------------------------------------------------------------------------------------------------------------------------------------------------------------------------------------------------------------------------------------------------------------------------------------------------------------------------------------------------------------------------------------------------------------------------------------------------------------------------------------------------------------------------------------------------------------------------------------------------------------------------------------------------------------------------------------------------------------------------------------------------------------------------------------------------------------------------------------------------------------------------------------------------------------------------------------------------------------------------------------------------------------------------------------------------------------------------------------------------------------------------------------------------------------------------------|
|            |                                              | core promoter binding (GO:0001047), P=0.033<br>DNA binding (GO:0003677), P=0.036                                                                                                                                                                                                                                                                                                                                                                                                                                                                                                                                                                                                                                                                                                                                                                                                                                                                                                                                                                                                                                                                                                                                                                                                                                                                                                                                                                                                                                                                                                                                                                                                                                                                                                                                                                                                                                                                                                                                                                                                                                                                                                                                                                                                                                                                                                                                                                                                                                                                                                                                                                                                                                                                                                                                                                                                                                                                                                                                                                                                                                                                                                  |
| PXMP4      | peroxisomal membrane protein 4               | No enriched terms                                                                                                                                                                                                                                                                                                                                                                                                                                                                                                                                                                                                                                                                                                                                                                                                                                                                                                                                                                                                                                                                                                                                                                                                                                                                                                                                                                                                                                                                                                                                                                                                                                                                                                                                                                                                                                                                                                                                                                                                                                                                                                                                                                                                                                                                                                                                                                                                                                                                                                                                                                                                                                                                                                                                                                                                                                                                                                                                                                                                                                                                                                                                                                 |
| ZNF341     | zinc finger protein 341                      | regulation of transcription, DNA-templated (GO:0006355), P=0.014<br>regulation of nucleic acid-templated transcription (GO:1903506), P=0.017<br>regulation of cellular macromolecule biosynthetic process (GO:2000112), P=0.019<br>regulation of gene expression (GO:0010468), P=0.047<br>DNA binding (GO:0003677), P=0.036                                                                                                                                                                                                                                                                                                                                                                                                                                                                                                                                                                                                                                                                                                                                                                                                                                                                                                                                                                                                                                                                                                                                                                                                                                                                                                                                                                                                                                                                                                                                                                                                                                                                                                                                                                                                                                                                                                                                                                                                                                                                                                                                                                                                                                                                                                                                                                                                                                                                                                                                                                                                                                                                                                                                                                                                                                                       |
| ZNF341-AS1 | ZNF341 antisense RNA 1                       | No enriched terms                                                                                                                                                                                                                                                                                                                                                                                                                                                                                                                                                                                                                                                                                                                                                                                                                                                                                                                                                                                                                                                                                                                                                                                                                                                                                                                                                                                                                                                                                                                                                                                                                                                                                                                                                                                                                                                                                                                                                                                                                                                                                                                                                                                                                                                                                                                                                                                                                                                                                                                                                                                                                                                                                                                                                                                                                                                                                                                                                                                                                                                                                                                                                                 |
| CHMP4B     | charged multivesicular body protein 4B       | <p>posttranslational protein targeting to endoplasmic reticulum membrane (GO:0006620), P=0.002</p> <p>negative regulation of autophagosome assembly (GO:1902902), P=0.002</p> <p>regulation of symbiosis, encompassing mutualism through parasitism (GO:0043903), P=0.003</p> <p>exit from mitosis (GO:0010458), P=0.003</p> <p>positive regulation of viral release from host cell (GO:1902188), P=0.004</p> <p>virion assembly (GO:0019068), P=0.004</p> <p>nuclear envelope reassembly (GO:0031468), P=0.004</p> <p>regulation of viral process (GO:0050792), P=0.004</p> <p>regulation of mitotic spindle assembly (GO:1901673), P=0.005</p> <p>viral budding via host ESCRT complex (GO:0039702), P=0.005</p> <p>negative regulation of macroautophagy (GO:0016242), P=0.005</p> <p>viral budding (GO:0046755), P=0.006</p> <p>regulation of centrosome duplication (GO:0010824), P=0.006</p> <p>regulation of spindle assembly (GO:0090169), P=0.006</p> <p>regulation of viral release from host cell (GO:1902186), P=0.006</p> <p>regulation of centrosome cycle (GO:0046605), P=0.006</p> <p>negative regulation of organelle assembly (GO:1902116), P=0.007</p> <p>multivesicular body assembly (GO:0036258), P=0.007</p> <p>nuclear envelope organization (GO:0006998), P=0.007</p> <p>multivesicular body organization (GO:0036257), P=0.008</p> <p>regulation of autophagosome assembly (GO:2000785), P=0.008</p> <p>positive regulation of locomotion (GO:0040017), P=0.008</p> <p>regulation of mitotic spindle organization (GO:0060236), P=0.009</p> <p>mitotic metaphase plate congression (GO:0007080), P=0.011</p> <p>metaphase plate congression (GO:0051310), P=0.011</p> <p>positive regulation of viral life cycle (GO:1903902), P=0.011</p> <p>nucleus organization (GO:0006997), P=0.011</p> <p>mitotic cytokinesis (GO:0000281), P=0.015</p> <p>protein targeting to membrane (GO:0006612), P=0.015</p> <p>cytoskeleton-dependent cytokinesis (GO:0061640), P=0.017</p> <p>regulation of neuron death (GO:1901214), P=0.018</p> <p>mitotic nuclear division (GO:0140014), P=0.018</p> <p>negative regulation of cell death (GO:0060548), P=0.020</p> <p>mitotic sister chromatid segregation (GO:0000070), P=0.020</p> <p>negative regulation of neuron death (GO:1901215), P=0.021</p> <p>regulation of mitotic nuclear division (GO:0007088), P=0.021</p> <p>proteolysis involved in cellular protein catabolic process (GO:0051603), P=0.023</p> <p>regulation of cell death (GO:0010941), P=0.024</p> <p>protein targeting to ER (GO:0045047), P=0.024</p> <p>viral life cycle (GO:0019058), P=0.026</p> <p>macroautophagy (GO:0016236), P=0.027</p> <p>protein homooligomerization (GO:0051260), P=0.047</p> <p>Budding and maturation of HIV virion Homo sapiens R-HSA-162588, P=(Reactome) 0.006</p> <p>Endosomal Sorting Complex Required For Transport (ESCRT) Homo sapiens R-HSA-917729 (Reactome), P=0.007</p> <p>Macroautophagy Homo sapiens R-HSA-1632852 (Reactome) , P=0.017</p> <p>Late Phase of HIV Life Cycle Homo sapiens R-HSA-162599, P= (Reactome) 0.032</p> <p>HIV Life Cycle Homo sapiens R-HSA-162587 (Reactome), P=0.035</p> |
| RALY       | RALY heterogeneous nuclear ribonucleoprotein | regulation of RNA biosynthetic process (GO:2001141), P=0.002<br>regulation of cholesterol homeostasis (GO:2000188), P= 0.003<br>RNA binding (GO:0003723), P=0.042                                                                                                                                                                                                                                                                                                                                                                                                                                                                                                                                                                                                                                                                                                                                                                                                                                                                                                                                                                                                                                                                                                                                                                                                                                                                                                                                                                                                                                                                                                                                                                                                                                                                                                                                                                                                                                                                                                                                                                                                                                                                                                                                                                                                                                                                                                                                                                                                                                                                                                                                                                                                                                                                                                                                                                                                                                                                                                                                                                                                                 |
| RALY-AS1   | RALY antisense RNA 1                         | No enriched terms                                                                                                                                                                                                                                                                                                                                                                                                                                                                                                                                                                                                                                                                                                                                                                                                                                                                                                                                                                                                                                                                                                                                                                                                                                                                                                                                                                                                                                                                                                                                                                                                                                                                                                                                                                                                                                                                                                                                                                                                                                                                                                                                                                                                                                                                                                                                                                                                                                                                                                                                                                                                                                                                                                                                                                                                                                                                                                                                                                                                                                                                                                                                                                 |

|         |                                                         |                                                                                                                                                     |
|---------|---------------------------------------------------------|-----------------------------------------------------------------------------------------------------------------------------------------------------|
| MIR4755 | microRNA 4755                                           | No enriched terms                                                                                                                                   |
| EIF2S2  | eukaryotic translation initiation factor 2 subunit beta | translation initiation factor activity (GO:0003743), P=0.009                                                                                        |
|         |                                                         | translation factor activity, RNA binding (GO:0008135), P=0.017                                                                                      |
|         |                                                         | RNA binding (GO:0003723), P=0.042                                                                                                                   |
|         |                                                         | Regulation of eIF2 Homo sapiens h eif2Pathway (BioCarta), P=0.003                                                                                   |
|         |                                                         | Double Stranded RNA Induced Gene Expression Homo sapiens h rnaPathway (BioCarta), P=0.003                                                           |
|         |                                                         | Eukaryotic protein translation Homo sapiens h eifPathway (BioCarta), P=0.003                                                                        |
|         |                                                         | Skeletal muscle hypertrophy is regulated via AKT/mTOR pathway Homo sapiens h igf1mTORpathway (BioCarta), P=0.006                                    |
|         |                                                         | Recycling of eIF2:GDP Homo sapiens R-HSA-72731 (Reactome), P=0.002                                                                                  |
|         |                                                         | ABC-family proteins mediated transport Homo sapiens R-HSA-382556 (Reactome), P=0.011                                                                |
|         |                                                         | Formation of the ternary complex, and subsequently, the 43S complex Homo sapiens R-HSA-72695 (Reactome), P=0.012                                    |
| ASIP    | agouti signaling protein                                | Ribosomal scanning and start codon recognition Homo sapiens R-HSA-72702 (Reactome), P=0.014                                                         |
|         |                                                         | Translation initiation complex formation Homo sapiens R-HSA-72649 (Reactome), P=0.014                                                               |
|         |                                                         | Activation of the mRNA upon binding of the cap-binding complex and eIFs, and subsequent binding to 43S Homo sapiens R-HSA-72662 (Reactome), P=0.014 |
|         |                                                         | L13a-mediated translational silencing of Ceruloplasmin expression Homo sapiens R-HSA-156827 (Reactome), P=0.026                                     |
|         |                                                         | 3'-UTR-mediated translational regulation Homo sapiens R-HSA-157279 (Reactome), P=0.026                                                              |
|         |                                                         | GTP hydrolysis and joining of the 60S ribosomal subunit Homo sapiens R-HSA-72706 (Reactome), P=0.026                                                |
|         |                                                         | Cap-dependent Translation Initiation Homo sapiens R-HSA-72737 (Reactome), P=0.028                                                                   |
|         |                                                         | Eukaryotic Translation Initiation Homo sapiens R-HSA-72613 (Reactome), P=0.028                                                                      |
|         |                                                         | Translation Homo sapiens R-HSA-72766 (Reactome), P=0.037                                                                                            |
|         |                                                         | Adipogenesis (WP236), P=0.045                                                                                                                       |
| AHCY    | adenosylhomocysteinase                                  | Proteins Involved in Diabetes Mellitus Type 2 (EPC), P=0.040                                                                                        |
|         |                                                         | Insulin regulation of blood glucose (EPC), P=0.009                                                                                                  |
|         |                                                         | Melanogenesis, P= (BP), P=0.035                                                                                                                     |
|         |                                                         | Adipogenesis, P= (BP), P=0.046                                                                                                                      |
|         |                                                         | Melanogenesis (KEGG), P=0.035                                                                                                                       |
|         |                                                         | Insulin-mediated glucose transport Homo sapiens 145e3376-6194-11e5-8ac5-06603eb7f303 (NCI-Nature), P=0.009                                          |
|         |                                                         | L-cysteine metabolic process (GO:0046439), P=0.002                                                                                                  |
|         |                                                         | methionine metabolic process (GO:0006555), P=0.004                                                                                                  |
|         |                                                         | sulfur amino acid metabolic process (GO:0000096), P= 0.008                                                                                          |
|         |                                                         | Trans-sulfuration pathway WP2333, P=0.003                                                                                                           |
| ITCH    | itchy E3 ubiquitin protein ligase                       | Methionine metabolism leading to Sulphur Amino Acids and related disorders (WP4292), P=0.004                                                        |
|         |                                                         | Methionine De Novo and Salvage Pathway (WP3580), P=0.008                                                                                            |
|         |                                                         | One Carbon Metabolism (WP241), P=0.010                                                                                                              |
|         |                                                         | Trans-sulfuration and one carbon metabolism (WP2525), P=0.011                                                                                       |
|         |                                                         | Ethanol effects on histone modifications (WP3996), P=0.011                                                                                          |
|         |                                                         | Sleep regulation (WP3591) P=0.013                                                                                                                   |
|         |                                                         | Folate Metabolism (WP176), P=0.023                                                                                                                  |
|         |                                                         | Methylation (BP), P= 0.004                                                                                                                          |
|         |                                                         | Sulfur amino acid metabolism (BP), P=0.008                                                                                                          |
|         |                                                         | Selenoamino acid metabolism (BP), P=0.009                                                                                                           |
|         |                                                         | One-carbon metabolism (BP), P=0.011                                                                                                                 |
|         |                                                         | Cysteine and methionine metabolism (BP), P=0.012                                                                                                    |
|         |                                                         | Folate metabolism (BP), P=0.022                                                                                                                     |
|         |                                                         | Phase II of biological oxidations: conjugation (BP), P=0.025                                                                                        |
|         |                                                         | Biological oxidations (BP), P=0.048                                                                                                                 |
|         |                                                         | Cysteine and methionine metabolism (KEGG), P=0.016                                                                                                  |
|         |                                                         | cysteine biosynthesis Homo sapiens PWY-6292 (HumanCyc) , P=0.002                                                                                    |
|         |                                                         | superpathway of methionine degradation Homo sapiens PWY-5328 (HumanCyc), P=0.006                                                                    |
|         |                                                         | Metabolism of ingested SeMet, Sec, MeSec into H2Se Homo sapiens R-HSA-2408508 (Reactome), P=0.003                                                   |
|         |                                                         | Methylation Homo sapiens R-HSA-156581 (Reactome), P=0.005                                                                                           |
|         |                                                         | Sulfur amino acid metabolism Homo sapiens R-HSA-1614635 (Reactome), P=0.009                                                                         |
|         |                                                         | Phase II conjugation Homo sapiens R-HSA-156580 (Reactome), P=0.034                                                                                  |
|         |                                                         | Selenoamino acid metabolism Homo sapiens R-HSA-2408522 (Reactome), P=0.038                                                                          |
|         |                                                         | regulation of protein deubiquitination (GO:0090085), P=0.002                                                                                        |
|         |                                                         | negative regulation of defense response to virus (GO:0050687), P=0.004                                                                              |
|         |                                                         | regulation of defense response to virus (GO:0050688), P=0.005                                                                                       |
|         |                                                         | regulation of protein modification by small protein conjugation or removal (GO:1903320), P=0.005                                                    |
|         |                                                         | negative regulation of immune effector process (GO:0002698), P=0.006                                                                                |

---

viral entry into host cell (GO:0046718), P=0.006  
 negative regulation of response to biotic stimulus (GO:0002832), P=0.007  
 cytoplasmic pattern recognition receptor signaling pathway (GO:0002753), P=0.008  
 nucleotide-binding domain, leucine rich repeat containing receptor signaling pathway (GO:0035872), P=0.009  
 negative regulation of JNK cascade (GO:0046329), P=0.010  
 nucleotide-binding oligomerization domain containing signaling pathway (GO:0070423), P=0.010  
 negative regulation of stress-activated MAPK cascade (GO:0032873), P=0.010  
 negative regulation of multi-organism process (GO:0043901), P=0.011  
 entry into host cell (GO:0030260), P=0.011  
 protein K63-linked ubiquitination (GO:0070534), P=0.013  
 negative regulation of type I interferon production (GO:0032480), P=0.015  
 protein K48-linked ubiquitination (GO:0070936), P=0.017  
 protein autoubiquitination (GO:0051865), P=0.017  
 Notch signaling pathway (GO:0007219), P=0.019  
 positive regulation of catabolic process (GO:0009896), P=0.022  
 regulation of proteolysis (GO:0030162), P=0.022  
 protein ubiquitination involved in ubiquitin-dependent protein catabolic process (GO:0042787), P=0.024  
 regulation of hematopoietic stem cell differentiation (GO:1902036), P=0.026  
 regulation of hematopoietic progenitor cell differentiation (GO:1901532), P=0.027  
 negative regulation of defense response (GO:0031348), P=0.028  
 positive regulation of protein catabolic process (GO:0045732), P=0.028  
 negative regulation of NF-kappaB transcription factor activity (GO:0032088), P=0.028  
 regulation of type I interferon production (GO:0032479), P=0.029  
 regulation of stem cell differentiation (GO:2000736), P=0.030  
 regulation of JNK cascade (GO:0046328), P=0.031  
 regulation of protein catabolic process (GO:0042176), P=0.031  
 positive regulation of protein metabolic process (GO:0051247), P=0.033  
 positive regulation of cellular catabolic process (GO:0031331), P=0.037  
 negative regulation of response to external stimulus (GO:0032102), P=0.037  
 viral life cycle (GO:0019058), P=0.037  
 negative regulation of cytokine production (GO:0001818), P=0.038  
 regulation of cellular component organization (GO:0051128), P=0.048  
 negative regulation of sequence-specific DNA binding transcription factor activity (GO:0043433), P=0.048  
 modification-dependent protein catabolic process (GO:0019941), P=0.048  
 Notch Signaling Pathway (WP61), P=0.021  
 TGF-beta Signaling Pathway (WP366), P=0.045  
 Hippo/YAP1 Signaling (EPC), P=0.011  
 Downregulation of ERBB4 signaling (BP), P=0.003  
 Activated NOTCH1 signaling in the nucleus (BP), P=0.011  
 Negative regulators of RIG-I/MDA5 signaling (BP), P=0.011  
 ERBB4 signaling events (BP), P=0.013  
 Nucleotide-binding domain, leucine rich repeat containing receptor (NLR) signaling pathways (BP), P=0.016  
 Regulation of NFAT transcription factors (BP), P=0.016  
 Delta Np63 pathway (BP), P=0.016  
 TAp63 pathway, P=(BP), P=0.019  
 Signaling by NOTCH1 (BP), P=0.025  
 RIG-I/MDA5-mediated induction of interferon-alpha/beta pathways (BP), P=0.026  
 p73 transcription factor network (BP), P=0.027  
 NOD signaling pathway (BP), P=0.029  
 Signaling by ERBB4 (BP), P=0.032  
 CXCR4 signaling pathway (BP), P=0.040  
 Signaling by NOTCH (BP), P=0.041  
 Notch signaling pathway, P=(BP), P=0.042  
 Ubiquitin-mediated proteolysis (BP), P=0.047  
 EGF/EGFR signaling pathway (BP), P=0.048  
 TGF-beta signaling pathway (BP), P=0.002  
 TNF signaling pathway (KEGG), P=0.038  
 Ubiquitin mediated proteolysis (KEGG), P=0.047  
 TGF-beta receptor signaling Homo sapiens 1f188fcc-6196-11e5-8ac5-06603eb7f303 (NCI-Nature), P=0.0001  
 ErbB4 signaling events Homo sapiens 6104ebb2-6192-11e5-8ac5-06603eb7f303 (NCI-Nature), P=0.013  
 Validated transcriptional targets of deltaNp63 isoforms Homo sapiens 7d7360a8-6196-11e5-8ac5-06603eb7f303, P=(NCI-Nature) 0.016  
 Calcineurin-regulated NFAT-dependent transcription in lymphocytes Homo sapiens 0439e9da-618f-11e5-8ac5-06603eb7f303 (NCI-Nature), P=0.016

---

|          |                                                         |                                                                                                                                                                                                                                                                                                                                                                                                                                                                                                                                                                                                                                                                                                                                                                                                                                                                                                                                                                                                                                                                                                                                                                                                                                                                                                                                                                                                                                                                                                                                                                                                                                                                                                                                                                                                                                                                                                                                                                                                                                                                                                                                                                                                                                         |
|----------|---------------------------------------------------------|-----------------------------------------------------------------------------------------------------------------------------------------------------------------------------------------------------------------------------------------------------------------------------------------------------------------------------------------------------------------------------------------------------------------------------------------------------------------------------------------------------------------------------------------------------------------------------------------------------------------------------------------------------------------------------------------------------------------------------------------------------------------------------------------------------------------------------------------------------------------------------------------------------------------------------------------------------------------------------------------------------------------------------------------------------------------------------------------------------------------------------------------------------------------------------------------------------------------------------------------------------------------------------------------------------------------------------------------------------------------------------------------------------------------------------------------------------------------------------------------------------------------------------------------------------------------------------------------------------------------------------------------------------------------------------------------------------------------------------------------------------------------------------------------------------------------------------------------------------------------------------------------------------------------------------------------------------------------------------------------------------------------------------------------------------------------------------------------------------------------------------------------------------------------------------------------------------------------------------------------|
|          |                                                         | Validated transcriptional targets of Tap63 isoforms Homo sapiens 82e8ee19-6196-11e5-8ac5-06603eb7f303 (NCI-Nature), P=0.018<br>Notch signaling pathway Homo sapiens 88f83518-6194-11e5-8ac5-06603eb7f303 (NCI-Nature), P=0.020<br>p73 transcription factor network Homo sapiens a88c505e-6194-11e5-8ac5-06603eb7f303 (NCI-Nature), P=0.027<br>CXCR4-mediated signaling events Homo sapiens 46a5529b-6191-11e5-8ac5-06603eb7f303 (NCI-Nature), P=0.034                                                                                                                                                                                                                                                                                                                                                                                                                                                                                                                                                                                                                                                                                                                                                                                                                                                                                                                                                                                                                                                                                                                                                                                                                                                                                                                                                                                                                                                                                                                                                                                                                                                                                                                                                                                   |
| MIR644A  | microRNA 644a                                           | No enriched terms                                                                                                                                                                                                                                                                                                                                                                                                                                                                                                                                                                                                                                                                                                                                                                                                                                                                                                                                                                                                                                                                                                                                                                                                                                                                                                                                                                                                                                                                                                                                                                                                                                                                                                                                                                                                                                                                                                                                                                                                                                                                                                                                                                                                                       |
| DYNLRB1  | dynein light chain roadblock-type 1                     | TGF-beta receptor signaling Homo sapiens 1f188fcc-6196-11e5-8ac5-06603eb7f303 (NCI-Nature), P=0.0001<br>intraciliary transport involved in cilium assembly (GO:0035735), P=0.014<br>intraciliary transport (GO:0042073), P=0.016<br>Intraflagellar transport proteins binding to dynein (WP4532), P=0.009<br>TGF-beta signaling pathway (BP), P=0.002<br>Intraflagellar transport Homo sapiens R-HSA-5620924 (Reactome), P=0.014                                                                                                                                                                                                                                                                                                                                                                                                                                                                                                                                                                                                                                                                                                                                                                                                                                                                                                                                                                                                                                                                                                                                                                                                                                                                                                                                                                                                                                                                                                                                                                                                                                                                                                                                                                                                        |
| MAP1LC3A | microtubule associated protein 1 light chain 3 alpha    | cellular response to nitrogen levels (GO:0043562), P=0.005<br>cellular response to nitrogen starvation (GO:0006995), P=0.005<br>autophagosome maturation (GO:0097352), P=0.008<br>mitochondrion disassembly (GO:0061726), P=0.013<br>autophagy of mitochondrion (GO:0000422), P=0.014<br>protein complex disassembly (GO:0043241), P=0.016<br>cellular response to nutrient levels (GO:0031669), P=0.019<br>autophagosome organization (GO:1905037), P=0.019<br>autophagosome assembly (GO:0000045), P=0.020<br>cellular response to starvation (GO:0009267), P=0.037<br>macroautophagy (GO:0016236), P=0.038<br>Nanoparticle triggered autophagic cell death (WP2509), P=0.008<br>Factors and pathways affecting insulin-like growth factor (IGF1)-Akt signaling (WP3850), P=0.011<br>Ferroptosis (WP4313), P=0.014<br>Senescence and Autophagy in Cancer (WP615), P=0.036<br>beta-Cell Function Inhibition by Rapamycin, Rodent Model, P=(EPC) 0.003<br>OPTN Associated Glaucoma (EPC), P=0.008<br>Autophagic-Lysosomal System Decline Associated with Aging (EPC), P=0.010<br>Senescence and autophagy (BP), P=0.034<br>Ferroptosis (KEGG), P=0.014<br>Downregulation of ERBB4 signaling Homo sapiens R-HSA-1253288 (Reactome), P= 0.003<br>Activated NOTCH1 Transmits Signal to the Nucleus Homo sapiens R-HSA-2122948 (Reactome), P=0.010<br>NOD1/2 Signaling Pathway Homo sapiens R-HSA-168638 (Reactome), P=0.011<br>Negative regulators of RIG-I/MDA5 signaling Homo sapiens R-HSA-936440, P=(Reactome) 0.012<br>Nucleotide-binding domain, leucine rich repeat containing receptor (NLR) signaling pathways Homo sapiens R-HSA-168643 (Reactome), P=0.016<br>Degradation of GLI1 by the proteasome Homo sapiens R-HSA-5610780 (Reactome), P=0.020<br>Signaling by NOTCH1 Homo sapiens R-HSA-1980143 (Reactome), P=0.025<br>RIG-I/MDA5 mediated induction of IFN-alpha/beta pathways Homo sapiens R-HSA-168928 (Reactome), P=0.027<br>Hedgehog 'on' state Homo sapiens R-HSA-5632684 (Reactome), P= 0.029<br>Hedgehog 'off' state Homo sapiens R-HSA-5610787 (Reactome), P= 0.034<br>Signaling by NOTCH Homo sapiens R-HSA-157118 (Reactome), P= 0.042<br>Signaling by Hedgehog Homo sapiens R-HSA-5358351 (Reactome), P= 0.047 |
| PIGU     | phosphatidylinositol glycan anchor biosynthesis class U | attachment of GPI anchor to protein (GO:0016255), P=0.002<br>protein localization to cell surface (GO:0034394), P=0.008<br>GPI anchor metabolic process (GO:0006505), P=0.009<br>GPI anchor biosynthetic process (GO:0006506), P=0.011<br>glycolipid biosynthetic process (GO:0009247), P=0.015<br>regulation of JAK-STAT cascade (GO:0046425), P=0.023<br>phosphatidylinositol biosynthetic process (GO:0006661), P=0.034<br>protein lipidation (GO:0006497), P=0.044<br>Attachment of GPI anchor to uPAR (BP), P=0.002<br>Post-translational modification: biosynthesis of GPI-anchored proteins , P=(BP), P=0.010<br>Glycosylphosphatidylinositol (GPI)-anchor biosynthesis (KEGG), P=0.009<br>Attachment of GPI anchor to uPAR Homo sapiens R-HSA-162791 (Reactome), P= 0.002<br>Post-translational modification: synthesis of GPI-anchored proteins Homo sapiens R-HSA-163125 (Reactome), P=0.009                                                                                                                                                                                                                                                                                                                                                                                                                                                                                                                                                                                                                                                                                                                                                                                                                                                                                                                                                                                                                                                                                                                                                                                                                                                                                                                                  |
| TP53INP2 | tumor protein p53 inducible nuclear protein 2           | positive regulation of nucleic acid-templated transcription (GO:1903508) , P=0.025<br>autophagosome organization (GO:1905037), P= 0.028<br>autophagosome assembly (GO:0000045), P=0.029                                                                                                                                                                                                                                                                                                                                                                                                                                                                                                                                                                                                                                                                                                                                                                                                                                                                                                                                                                                                                                                                                                                                                                                                                                                                                                                                                                                                                                                                                                                                                                                                                                                                                                                                                                                                                                                                                                                                                                                                                                                 |

|         |                                                 |                                                                                                                                     |
|---------|-------------------------------------------------|-------------------------------------------------------------------------------------------------------------------------------------|
| NCOA6   | nuclear receptor coactivator 6                  | glucocorticoid receptor signaling pathway (GO:0042921), P=0.003                                                                     |
|         |                                                 | corticosteroid receptor signaling pathway (GO:0031958), P=0.003                                                                     |
|         |                                                 | intracellular estrogen receptor signaling pathway (GO:0030520), P=0.009                                                             |
|         |                                                 | RNA biosynthetic process (GO:0032774), P=0.013                                                                                      |
|         |                                                 | myeloid cell differentiation (GO:0030099), P=0.022                                                                                  |
|         |                                                 | DNA recombination (GO:0006310), P=0.027                                                                                             |
|         |                                                 | positive regulation of nucleic acid-templated transcription (GO:1903508), P=0.025                                                   |
|         |                                                 | intracellular steroid hormone receptor signaling pathway (GO:0030518), P=0.033                                                      |
|         |                                                 | hemopoiesis (GO:0030097), P=0.037                                                                                                   |
|         |                                                 | regulation of lipid metabolic process (GO:0019216), P=0.049                                                                         |
|         |                                                 | retinoid X receptor binding (GO:0046965), P=0.004                                                                                   |
|         |                                                 | retinoic acid receptor binding (GO:0042974), P=0.008                                                                                |
|         |                                                 | thyroid hormone receptor binding (GO:0046966), P=0.013                                                                              |
|         |                                                 | estrogen receptor binding (GO:0030331), P=0.016                                                                                     |
|         |                                                 | hormone receptor binding (GO:0051427), P=0.020                                                                                      |
|         |                                                 | nuclear hormone receptor binding (GO:0035257), P=0.028                                                                              |
|         |                                                 | ligand-dependent nuclear receptor transcription coactivator activity (GO:0030374), P=0.032                                          |
|         |                                                 | steroid hormone receptor binding (GO:0035258), P=0.037                                                                              |
|         |                                                 | Constitutive Androstane Receptor Pathway (WP2875), P=0.016                                                                          |
|         |                                                 | Metabolism Homo sapiens R-HSA-1430728 (Reactome), P=0.011                                                                           |
|         |                                                 | RORA activates gene expression Homo sapiens R-HSA-1368082 (Reactome), P=0.013                                                       |
|         |                                                 | YAP1- and WWTR1 (TAZ)-stimulated gene expression Homo sapiens R-HSA-2032785 (Reactome), P=0.014                                     |
|         |                                                 | Transcriptional activation of mitochondrial biogenesis Homo sapiens R-HSA-2151201 (Reactome), P=0.020                               |
|         |                                                 | BMAL1:CLOCK,NPAS2 activates circadian gene expression Homo sapiens R-HSA-1368108 (Reactome), P=0.021                                |
|         |                                                 | Activation of gene expression by SREBF (SREBP) Homo sapiens R-HSA-2426168 (Reactome), P=0.021                                       |
|         |                                                 | Mitochondrial biogenesis Homo sapiens R-HSA-1592230 (Reactome), P=0.024                                                             |
|         |                                                 | Regulation of cholesterol biosynthesis by SREBP (SREBF) Homo sapiens R-HSA-1655829 (Reactome), P=0.027                              |
|         |                                                 | Circadian Clock Homo sapiens R-HSA-400253 (Reactome), P=0.031                                                                       |
|         |                                                 | Transcriptional regulation of white adipocyte differentiation Homo sapiens R-HSA-381340 (Reactome), P=0.039                         |
|         |                                                 | Activation of HOX genes during differentiation Homo sapiens R-HSA-5619507 (Reactome), P=0.044                                       |
|         |                                                 | Activation of anterior HOX genes in hindbrain development during early embryogenesis Homo sapiens R-HSA-5617472 (Reactome), P=0.044 |
| HMGB3P1 | high mobility group box 3 pseudogene 1          | No enriched terms                                                                                                                   |
| GGT7    | gamma-glutamyltransferase 7                     | sulfur compound biosynthetic process (GO:0044272), P=0.002                                                                          |
|         |                                                 | regulation of response to oxidative stress (GO:1902882), P=0.004                                                                    |
|         |                                                 | leukotriene D4 biosynthetic process (GO:1901750), P= 0.005                                                                          |
|         |                                                 | leukotriene D4 metabolic process (GO:1901748), P=0.005                                                                              |
|         |                                                 | leukotriene biosynthetic process (GO:0019370), P=0.009                                                                              |
|         |                                                 | Metabolism Homo sapiens R-HSA-1430728 (Reactome), P=0.011                                                                           |
|         |                                                 | Ethanol oxidation Homo sapiens R-HSA-71384 (Reactome), P=0.006                                                                      |
|         |                                                 | Aflatoxin activation and detoxification Homo sapiens R-HSA-5423646 (Reactome), P=0.010                                              |
|         |                                                 | Glutathione synthesis and recycling Homo sapiens R-HSA-174403 (Reactome), P=0.00002                                                 |
|         |                                                 | Glutathione conjugation Homo sapiens R-HSA-156590 (Reactome), P=0.0002                                                              |
| ACSS2   | acyl-CoA synthetase short chain family member 2 | Phase II conjugation Homo sapiens R-HSA-156580 (Reactome), P=0.001                                                                  |
|         |                                                 | CoA-ligase activity (GO:0016405), P=0.005                                                                                           |
|         |                                                 | acid-thiol ligase activity (GO:0016878), P=0.008                                                                                    |
|         |                                                 | adenyl ribonucleotide binding (GO:0032559), P=0.008                                                                                 |
|         |                                                 | lipid biosynthetic process (GO:0008610), P=0.035                                                                                    |
|         |                                                 | Fatty Acid Biosynthesis (WP357), P=0.011                                                                                            |
|         |                                                 | Lipid Metabolism Pathway (WP3965), P=0.014                                                                                          |
|         |                                                 | Ethanol effects on histone modifications (WP3996), P=0.015                                                                          |
|         |                                                 | Fatty Acid Beta Oxidation (WP143), P=0.017                                                                                          |
|         |                                                 | ethanol degradation II Homo sapiens PWY66-21 (HumanCyc), P=0.003                                                                    |
|         |                                                 | ethanol degradation IV Homo sapiens PWY66-162, P=0.003                                                                              |
|         |                                                 | oxidative ethanol degradation III Homo sapiens PWY66-161, P=0.003                                                                   |
|         |                                                 | Biological oxidations Homo sapiens R-HSA-211859, P= (Reactome) 0.0001                                                               |
|         |                                                 | Metabolism Homo sapiens R-HSA-1430728 (Reactome), P=0.011                                                                           |
| GSS     | glutathione synthetase                          | Ethanol oxidation Homo sapiens R-HSA-71384 (Reactome), P=0.006                                                                      |
|         |                                                 | Phase 1 - Functionalization of compounds Homo sapiens R-HSA-211945 (Reactome), P=0.045                                              |
|         |                                                 | sulfur compound biosynthetic process (GO:0044272), P=0.002                                                                          |
|         |                                                 | glutathione biosynthetic process (GO:0006750), P=0.005                                                                              |
|         |                                                 | nonribosomal peptide biosynthetic process (GO:0019184), P=0.006                                                                     |

|                 |                                                                                                       |                                                                                                                                                                                                                                                                                                                                                                                                                                                                                                                                                                                                                                                                                                                                                                                                                                                                                                                                                                                                                                                                                                                                                                                                                                                                                                                                                                                                     |
|-----------------|-------------------------------------------------------------------------------------------------------|-----------------------------------------------------------------------------------------------------------------------------------------------------------------------------------------------------------------------------------------------------------------------------------------------------------------------------------------------------------------------------------------------------------------------------------------------------------------------------------------------------------------------------------------------------------------------------------------------------------------------------------------------------------------------------------------------------------------------------------------------------------------------------------------------------------------------------------------------------------------------------------------------------------------------------------------------------------------------------------------------------------------------------------------------------------------------------------------------------------------------------------------------------------------------------------------------------------------------------------------------------------------------------------------------------------------------------------------------------------------------------------------------------|
|                 |                                                                                                       | <p>cellular modified amino acid biosynthetic process (GO:0042398), P=0.012</p> <p>glutathione metabolic process (GO:0006749), P=0.024</p> <p>acid-amino acid ligase activity (GO:0016881), P=0.007</p> <p>adenyl ribonucleotide binding (GO:0032559), P=0.008</p> <p>Gamma-Glutamyl Cycle for the biosynthesis and degradation of glutathione, including diseases (WP4518), P=0.005</p> <p>Cysteine and methionine catabolism (WP4504), P=0.007</p> <p>Glutathione metabolism (WP100), P=0.011</p> <p>Trans-sulfuration and one carbon metabolism (WP2525), P=0.015</p> <p>Ferroptosis (WP4313), P=0.020</p> <p>One carbon metabolism and related pathways (WP3940), P=0.026</p> <p>Amino Acid metabolism (WP3925, P=) 0.045</p> <p>&amp;gamma;-glutamyl cycle Homo sapiens PWY-4041 (HumanCyc), P=0.004</p> <p>Metabolism Homo sapiens R-HSA-1430728 (Reactome), P=0.011</p> <p>Ethanol oxidation Homo sapiens R-HSA-71384 (Reactome), P=0.006</p> <p>Glutathione synthesis and recycling Homo sapiens R-HSA-174403 (Reactome), P=0.00002</p> <p>Glutathione conjugation Homo sapiens R-HSA-156590 (Reactome), P=0.0002</p> <p>Phase II conjugation Homo sapiens R-HSA-156580 (Reactome), P=0.001</p>                                                                                                                                                                                              |
| TRPC4AP         | tumor protein p53 inducible nuclear protein 2                                                         | <p>calcium ion transmembrane transporter activity (GO:0015085), P=0.038</p> <p>calcium ion transmembrane transport (GO:0070588), P= 0.042</p> <p>calcium channel activity (GO:0005262), P=0.046</p> <p>phosphatase binding (GO:0019902), P=0.050</p> <p>TRP channels Homo sapiens R-HSA-3295583 (Reactome), P=0.012</p> <p>Stimuli-sensing channels Homo sapiens R-HSA-2672351 (Reactome), P=0.049</p>                                                                                                                                                                                                                                                                                                                                                                                                                                                                                                                                                                                                                                                                                                                                                                                                                                                                                                                                                                                              |
| MYH7B           | myosin heavy chain 7B                                                                                 | <p>Nicotinic acetylcholine receptor signaling pathway Homo sapiens (P00044), P=0.03</p> <p>Cytoskeletal regulation by Rho GTPase Homo sapiens (P00016), P=0.03</p> <p>Translocation of GLUT4 to the plasma membrane Homo sapiens R-HSA-1445148 (Reactome), P=0.030</p>                                                                                                                                                                                                                                                                                                                                                                                                                                                                                                                                                                                                                                                                                                                                                                                                                                                                                                                                                                                                                                                                                                                              |
| MIR499A         | microRNA 499a                                                                                         | No enriched terms                                                                                                                                                                                                                                                                                                                                                                                                                                                                                                                                                                                                                                                                                                                                                                                                                                                                                                                                                                                                                                                                                                                                                                                                                                                                                                                                                                                   |
| MIR499B         | microRNA 499b                                                                                         | No enriched terms                                                                                                                                                                                                                                                                                                                                                                                                                                                                                                                                                                                                                                                                                                                                                                                                                                                                                                                                                                                                                                                                                                                                                                                                                                                                                                                                                                                   |
| MMP24-AS1-EDEM2 | matrix metalloproteinase 24 antisense RNA 1-ER degradation enhancing alpha-mannosidase like protein 2 | No enriched terms                                                                                                                                                                                                                                                                                                                                                                                                                                                                                                                                                                                                                                                                                                                                                                                                                                                                                                                                                                                                                                                                                                                                                                                                                                                                                                                                                                                   |
| EDEM2           | ER degradation enhancing alpha-mannosidase like protein 2                                             | <p>endoplasmic reticulum quality control compartment (GO:0044322), P=0.004</p> <p>positive regulation of protein exit from endoplasmic reticulum (GO:0070863), P=0.005</p> <p>mitochondrial respiratory chain complex III biogenesis (GO:0097033), P=0.005</p> <p>regulation of retrograde protein transport, ER to cytosol (GO:1904152), P=0.006</p> <p>positive regulation of ERAD pathway (GO:1904294), P=0.006</p> <p>maturation of 5.8S rRNA (GO:0000460), P=0.008</p> <p>endoplasmic reticulum mannose trimming (GO:1904380), P=0.009</p> <p>protein alpha-1,2-demannosylation (GO:0036508), P=0.012</p> <p>glycoprotein metabolic process (GO:0009100), P=0.024</p> <p>ubiquitin-dependent ERAD pathway (GO:0030433), P=0.029</p> <p>Wolfram Syndrome Progression, Hypothesis (EPC), P=0.009</p> <p>SERPINA1 Associated Liver Damage (EPC), P=0.012</p> <p>Nitric Oxide Effects on beta-Cell (EPC), P=0.013</p> <p>MYOC Associated Glaucoma (EPC), P=0.014</p> <p>Hyperglycemia and Hyperlipidemia Trigger beta-Cell Apoptosis (EPC), P=0.014</p> <p>CFTR Misfolding and Degradation (Class II Mutations) (EPC), P=0.015</p> <p>ER Stress (Unfolded Protein Response) (EPC), P=0.015</p> <p>ER quality control compartment, ERQC (BP), P=0.003</p> <p>N-glycan trimming in the ER and calnexin/calreticulin cycle (BP), P=0.006</p> <p>Asparagine N-linked glycosylation, P=(BP), P=0.04</p> |
| PROCR           | protein C receptor                                                                                    | <p>glycoprotein catabolic process (GO:0006516), P=0.005</p> <p>negative regulation of coagulation (GO:0050819), P=0.007</p> <p>Hematopoietic Cell Lineage: B-cell (EPC), P=0.019</p> <p>Arterial Hypertension (EPC), P=0.022</p> <p>Vascular Endothelial Cell Activation by Growth Factors (EPC), P=0.025</p> <p>Vascular Endothelial Cell Activation by Blood Coagulation Factors (EPC), P=0.028</p> <p>Vascular Endothelial Cell Activation by Cytokines (EPC), P=0.033</p>                                                                                                                                                                                                                                                                                                                                                                                                                                                                                                                                                                                                                                                                                                                                                                                                                                                                                                                       |

|            |                                                            |                                                                                                                                                                                                                                                                                                                                                                                                                                                                                                                                                                                                                                                                                                                                                                                                                                                                                                                                                                                                                                                                                                                                                                                                                                                                                                                                                                                                                                                                                                                                                                                                                                                                                                                                                                                                                                                                                                                                                                                                                                                                                                                    |
|------------|------------------------------------------------------------|--------------------------------------------------------------------------------------------------------------------------------------------------------------------------------------------------------------------------------------------------------------------------------------------------------------------------------------------------------------------------------------------------------------------------------------------------------------------------------------------------------------------------------------------------------------------------------------------------------------------------------------------------------------------------------------------------------------------------------------------------------------------------------------------------------------------------------------------------------------------------------------------------------------------------------------------------------------------------------------------------------------------------------------------------------------------------------------------------------------------------------------------------------------------------------------------------------------------------------------------------------------------------------------------------------------------------------------------------------------------------------------------------------------------------------------------------------------------------------------------------------------------------------------------------------------------------------------------------------------------------------------------------------------------------------------------------------------------------------------------------------------------------------------------------------------------------------------------------------------------------------------------------------------------------------------------------------------------------------------------------------------------------------------------------------------------------------------------------------------------|
| MMP24      | matrix metalloproteinase 24                                | trans-Golgi network membrane (GO:0032588), P=0.042<br>regulation of fatty acid metabolic process (GO:0019217), P=0.007<br>cell-cell adhesion mediated by cadherin (GO:0044331), P=0.011<br>sensory perception of pain (GO:0019233), P=0.012<br>glial cell differentiation (GO:0010001), P=0.012<br>Matrix metalloproteinases, P= (BP) 0.014<br>Activation of matrix metalloproteinases (BP), P=0.015<br>Extracellular matrix organization (BP), P=0.046                                                                                                                                                                                                                                                                                                                                                                                                                                                                                                                                                                                                                                                                                                                                                                                                                                                                                                                                                                                                                                                                                                                                                                                                                                                                                                                                                                                                                                                                                                                                                                                                                                                            |
|            | MMP24 opposite strand                                      | unknown function                                                                                                                                                                                                                                                                                                                                                                                                                                                                                                                                                                                                                                                                                                                                                                                                                                                                                                                                                                                                                                                                                                                                                                                                                                                                                                                                                                                                                                                                                                                                                                                                                                                                                                                                                                                                                                                                                                                                                                                                                                                                                                   |
| EIF6       | eukaryotic translation initiation factor 6                 | preribosome, large subunit precursor (GO:0030687), P=0.013<br>preribosome (GO:0030684), P=0.037<br>positive regulation of translation (GO:0045727), P=0.001<br>rRNA-containing ribonucleoprotein complex export from nucleus (GO:0071428), P=0.003<br>miRNA mediated inhibition of translation (GO:0035278), P=0.005<br>negative regulation of translation, ncRNA-mediated (GO:0040033), P=0.005<br>ribosomal subunit export from nucleus (GO:0000054), P=0.006<br>gliogenesis (GO:0042063), P=0.007<br>N-glycan processing (GO:0006491), P=0.008<br>posttranscriptional gene silencing by RNA (GO:0035194), P=0.009<br>maturation of LSU-rRNA (GO:0000470), P=0.011<br>regulation of fatty acid biosynthetic process (GO:0042304), P=0.014<br>regulation of lipid biosynthetic process (GO:0046890), P=0.014<br>regulation of cellular biosynthetic process (GO:0031326), P=0.014<br>gene silencing by miRNA (GO:0035195), P=0.015<br>regulation of carbohydrate catabolic process (GO:0043470), P=0.018<br>regulation of coenzyme metabolic process (GO:0051196), P=0.019<br>response to peptide hormone (GO:0043434), P=0.020<br>regulation of cellular metabolic process (GO:0031323), P=0.020<br>regulation of ATP metabolic process (GO:1903578), P=0.021<br>regulation of generation of precursor metabolites and energy (GO:0043467), P=0.023<br>regulation of megakaryocyte differentiation (GO:0045652), P=0.024<br>regulation of reactive oxygen species metabolic process (GO:2000377), P=0.024<br>ribosome assembly (GO:0042255), P=0.028<br>regulation of glycolytic process (GO:0006110), P=0.028<br>positive regulation of cellular amide metabolic process (GO:0034250), P=0.030<br>ribosomal large subunit biogenesis (GO:0042273), P=0.031<br>regulation of myeloid cell differentiation (GO:0045637), P=0.032<br>response to insulin (GO:0032868), P=0.035<br>negative regulation of translation (GO:0017148), P=0.043<br>positive regulation of cellular protein metabolic process (GO:0032270), P=0.045<br>Eukaryotic protein translation (BP), P=0.008<br>Translation factors (BP), P=0.025 |
|            |                                                            |                                                                                                                                                                                                                                                                                                                                                                                                                                                                                                                                                                                                                                                                                                                                                                                                                                                                                                                                                                                                                                                                                                                                                                                                                                                                                                                                                                                                                                                                                                                                                                                                                                                                                                                                                                                                                                                                                                                                                                                                                                                                                                                    |
| FAM83C-AS1 | FAM83C antisense RNA 1                                     | No enriched terms                                                                                                                                                                                                                                                                                                                                                                                                                                                                                                                                                                                                                                                                                                                                                                                                                                                                                                                                                                                                                                                                                                                                                                                                                                                                                                                                                                                                                                                                                                                                                                                                                                                                                                                                                                                                                                                                                                                                                                                                                                                                                                  |
| FAM83C     | family with sequence similarity 83 member C                | No enriched terms                                                                                                                                                                                                                                                                                                                                                                                                                                                                                                                                                                                                                                                                                                                                                                                                                                                                                                                                                                                                                                                                                                                                                                                                                                                                                                                                                                                                                                                                                                                                                                                                                                                                                                                                                                                                                                                                                                                                                                                                                                                                                                  |
| UQCC1      | ubiquinol-cytochrome c reductase complex assembly factor 1 | positive regulation of translation (GO:0045727), P=0.001<br>mitochondrial respiratory chain complex III assembly (GO:0034551), P=0.004<br>positive regulation of mitochondrial translation (GO:0070131), P=0.004<br>respiratory chain complex III assembly (GO:0017062), P=0.004<br>regulation of coagulation (GO:0050818), P=0.005<br>regulation of mitochondrial translation (GO:0070129), P=0.007<br>mitochondrial respiratory chain complex assembly (GO:0033108), P=0.047                                                                                                                                                                                                                                                                                                                                                                                                                                                                                                                                                                                                                                                                                                                                                                                                                                                                                                                                                                                                                                                                                                                                                                                                                                                                                                                                                                                                                                                                                                                                                                                                                                     |
|            |                                                            |                                                                                                                                                                                                                                                                                                                                                                                                                                                                                                                                                                                                                                                                                                                                                                                                                                                                                                                                                                                                                                                                                                                                                                                                                                                                                                                                                                                                                                                                                                                                                                                                                                                                                                                                                                                                                                                                                                                                                                                                                                                                                                                    |
| MIR1289-1  | microRNA 1289-1                                            | No enriched terms                                                                                                                                                                                                                                                                                                                                                                                                                                                                                                                                                                                                                                                                                                                                                                                                                                                                                                                                                                                                                                                                                                                                                                                                                                                                                                                                                                                                                                                                                                                                                                                                                                                                                                                                                                                                                                                                                                                                                                                                                                                                                                  |
| GDF5OS     | GDF5 antisense RNA 1                                       | No enriched terms                                                                                                                                                                                                                                                                                                                                                                                                                                                                                                                                                                                                                                                                                                                                                                                                                                                                                                                                                                                                                                                                                                                                                                                                                                                                                                                                                                                                                                                                                                                                                                                                                                                                                                                                                                                                                                                                                                                                                                                                                                                                                                  |
| GDF5       | growth differentiation factor 5                            | Waist-to-hip ratio adjusted for BMI (GWAS catalog), P=3.1E-08<br>Waist-to-hip ratio adjusted for BMI, age >50 (GWAS catalog), P=3.3E-11<br>Waist-to-hip ratio adjusted for BMI x sex x age interaction, 4df test (GWAS catalog), P=1.2E-09<br>Waist-to-hip ratio adjusted for BMI in active individuals, P=2.7E-02<br>Waist-to-hip ratio adjusted for BMI (joint analysis for main effect and physical activity interaction), P=3.3E-02                                                                                                                                                                                                                                                                                                                                                                                                                                                                                                                                                                                                                                                                                                                                                                                                                                                                                                                                                                                                                                                                                                                                                                                                                                                                                                                                                                                                                                                                                                                                                                                                                                                                            |
|            |                                                            |                                                                                                                                                                                                                                                                                                                                                                                                                                                                                                                                                                                                                                                                                                                                                                                                                                                                                                                                                                                                                                                                                                                                                                                                                                                                                                                                                                                                                                                                                                                                                                                                                                                                                                                                                                                                                                                                                                                                                                                                                                                                                                                    |



|               |                                         |                                                                                                                                                                                                                                                                                                                              |
|---------------|-----------------------------------------|------------------------------------------------------------------------------------------------------------------------------------------------------------------------------------------------------------------------------------------------------------------------------------------------------------------------------|
| <i>CEP250</i> | centrosomal protein 250                 | Waist-to-hip ratio adjusted for BMI (GWAS catalog), $P=3.1E-08$<br>Waist-to-hip ratio adjusted for BMI, age >50 (GWAS catalog), $P=3.3E-11$<br>Waist-to-hip ratio adjusted for BMI x sex x age interaction, 4df test (GWAS catalog), $P=1.2E-09$<br>NRF1 ENCODE, $P=0.021$                                                   |
| <i>ERGIC3</i> | ERGIC and golgi 3                       | Waist-to-hip ratio adjusted for BMI (GWAS catalog), $P=3.1E-08$<br>Waist-to-hip ratio adjusted for BMI, age >50 (GWAS catalog), $P=3.3E-11$<br>Waist-to-hip ratio adjusted for BMI x sex x age interaction, 4df test (GWAS catalog), $P=1.2E-09$<br>NRF1 ENCODE, $P=0.021$                                                   |
| <i>FER1L4</i> | fer-1 like family member 4 (pseudogene) | Waist-to-hip ratio adjusted for BMI (GWAS catalog), $P=3.1E-08$<br>Waist-to-hip ratio adjusted for BMI, age >50 (GWAS catalog), $P=3.3E-11$<br>Waist-to-hip ratio adjusted for BMI x sex x age interaction, 4df test (GWAS catalog), $P=1.2E-09$                                                                             |
| <i>SPAG4</i>  | sperm associated antigen 4              | Waist-to-hip ratio adjusted for BMI (GWAS catalog), $P=3.1E-08$<br>Waist-to-hip ratio adjusted for BMI, age >50 (GWAS catalog), $P=3.3E-11$<br>Waist-to-hip ratio adjusted for BMI x sex x age interaction, 4df test (GWAS catalog), $P=1.2E-09$<br>CREB1 CHEA, $P=0.05$<br>ATF2 ENCODE, $P=0.019$                           |
| <i>CPNE1</i>  | copine 1                                | Waist-to-hip ratio adjusted for BMI (GWAS catalog), $P=3.1E-08$<br>Waist-to-hip ratio adjusted for BMI, age >50 (GWAS catalog), $P=3.3E-11$<br>Waist-to-hip ratio adjusted for BMI x sex x age interaction, 4df test (GWAS catalog), $P=1.2E-09$<br>NRF1 ENCODE, $P=0.021$<br>E2F1 CHEA, $P=0.013$<br>ATF2 ENCODE, $P=0.019$ |
| <i>RBM12</i>  | RNA binding motif protein 12            | Waist-to-hip ratio adjusted for BMI, age >50 (GWAS catalog), $P=3.3E-11$<br>Waist-to-hip ratio adjusted for BMI x sex x age interaction, 4df test (GWAS catalog), $P=1.2E-09$<br>NRF1 ENCODE, $P=0.021$<br>ATF2 ENCODE, $P=0.019$                                                                                            |
| <i>NFS1</i>   | NFS1 cysteine desulfurase               | NR2C2 ENCODE, $P=0.018$                                                                                                                                                                                                                                                                                                      |
| <i>ROMO1</i>  | reactive oxygen species modulator 1     | NR2C2 ENCODE, $P=0.018$                                                                                                                                                                                                                                                                                                      |
| <i>RBM39</i>  | RNA binding motif protein 39            | E2F1 CHEA, $P=0.013$<br>CREB1 CHEA, $P=0.050$<br>ATF2 ENCODE, $P=0.019$                                                                                                                                                                                                                                                      |
| <i>PHF20</i>  | PHD finger protein 20                   | E2F1 CHEA, $P=0.013$<br>CREB1 CHEA, $P=0.05$<br>ATF2 ENCODE, $P=0.019$                                                                                                                                                                                                                                                       |

\* Data obtained by the Enrichr bioinformatic tools (<https://maayanlab.cloud/Enrichr/>), date of access 01.06.2020.

Databases indicated: GO (Gene Ontology), WP (WikiPathways 2019 Human), KEGG, Reactome, BioCarta, Panther, BP (BioPlanet 2019), KEGG, NCI-Nature, HumanCyc 2016, Virus-Host PPI P-HIPSTer 2020, PWY (BioCyc), Elsevier Pathway Collection (EPC), GWAS catalog, ENCODE, CHEA 2016.
