# Supplementary material for: El secreto judicial y las garantías constitucionales del derecho a un proceso debido
Source: MDPI journal article supplement (doi:10.3390/life11090886), 1988-01-01
Supplement: s1 [file s1]

**Supplementary Table S2.** Linkage disequilibrium values ( $D'$ ) between pairs of the studied SNPs across populations from the 1000 Genomes Project

| Gene / SNP ID | MAF        | Population | <i>GSS</i> |            | <i>GGT7</i> |            |
|---------------|------------|------------|------------|------------|-------------|------------|
|               |            |            | rs6088660  | rs13041792 | rs6119534   | rs11546155 |
| <i>GSS</i>    | rs1801310  | Russian    | 0.9802     | 0.8986     | 0.8333      | 0.8165     |
|               |            | AFR        | 0.4512     | 0.9382     | 0.9471      | 1.0000     |
|               |            | AMR        | 0.9831     | 0.9660     | 0.9896      | 0.9549     |
|               |            | EAS        | 0.9839     | 0.9747     | 0.9873      | 0.4751     |
|               |            | EUR        | 1.0000     | 0.9770     | 0.9816      | 0.8487     |
|               |            | SAS        | 0.9873     | 0.9678     | 0.9877      | 0.8487     |
|               | rs6088660  | Russian    | *          | 0.9828     | 0.3813      | 0.6067     |
|               |            | AFR        | *          | 1.0000     | 0.3411      | 0.3608     |
|               |            | AMR        | *          | 1.0000     | 0.5012      | 0.6217     |
|               |            | EAS        | *          | 1.0000     | 0.9018      | 0.5499     |
|               |            | EUR        | *          | 1.0000     | 0.3201      | 0.6629     |
|               |            | SAS        | *          | 1.0000     | 0.8170      | 0.7098     |
|               | rs13041792 | Russian    |            | *          | 0.7978      | 0.9014     |
|               |            | AFR        |            | *          | 0.5859      | 1.0000     |
|               |            | AMR        |            | *          | 0.8409      | 0.4258     |
|               |            | EAS        |            | *          | 0.9502      | 0.8000     |
|               |            | EUR        |            | *          | 0.9050      | 0.7247     |
|               |            | SAS        |            | *          | 0.9236      | 0.9712     |
| <i>GGT7</i>   | rs6119534  | Russian    |            |            | *           | 0.8228     |
|               |            | AFR        |            |            | *           | 0.9741     |
|               |            | AMR        |            |            | *           | 0.8828     |
|               |            | EAS        |            |            | *           | 0.9333     |
|               |            | EUR        |            |            | *           | 0.9755     |
|               |            | SAS        |            |            | *           | 0.9889     |
|               | rs11546155 | Russian    |            |            |             | *          |
|               |            | AFR        |            |            |             | *          |
|               |            | AMR        |            |            |             | *          |
|               |            | EAS        |            |            |             | *          |
|               |            | EUR        |            |            |             | *          |
|               |            | SAS        |            |            |             | *          |

$D'$ -values estimated by LDpair Tool (<https://ldlink.nci.nih.gov/?tab=ldpair>). Only statistically significant  $D'$ -values are shown.

\* Populations: Russian (the studied population); AFR, African; AMR, Ad Mixed American; EAS, East Asian; EUR, European; SAS, South Asian. MAF, minor allele frequency.
