# Supplementary material for: El secreto judicial y las garantías constitucionales del derecho a un proceso debido
Source: MDPI journal article supplement (doi:10.3390/life11090886), 1988-01-01
Supplement: s1 [file s1]

**Supplementary Table S4 Tissue-specific eQTL analysis for the polymorphisms of GSS and GGT7 genes**

| Gene         | Effect allele | SNP ID         | Whole blood <sup>1</sup> |          | Pancreas <sup>2</sup>       |            | Adipose tissue (visceral) <sup>2</sup> |                    | Skeletal muscle <sup>2</sup> |            | Liver <sup>2</sup>         |                   |
|--------------|---------------|----------------|--------------------------|----------|-----------------------------|------------|----------------------------------------|--------------------|------------------------------|------------|----------------------------|-------------------|
|              |               |                | <i>Q</i>                 | <i>Z</i> | <i>P</i>                    | <i>NES</i> | <i>P</i>                               | <i>NES</i>         | <i>P</i>                     | <i>NES</i> | <i>P</i>                   | <i>NES</i>        |
| GSS          | A             | rs1304179<br>2 | -                        | -        | -                           | -          | -                                      | -                  | -                            | -          | <b>0.009*</b>              | 0.87 <sup>β</sup> |
| TRPC4AP      | A             | rs1304179<br>2 | <b>&lt;0.0001</b>        | -58.8    | -                           | -          | <b>0.00032</b>                         | -0.13              | -                            | -          | <b>1.1×10<sup>-5</sup></b> | -0.30             |
| EDEM2        | A             | rs1304179<br>2 | <b>&lt;0.0001</b>        | -36.9    | <b>1.3×10<sup>-18</sup></b> | 0.48       | <b>6×10<sup>-6</sup></b>               | -0.16              | <b>1.2×10<sup>-14</sup></b>  | -0.19      | -                          | -                 |
| MAP1LC3<br>A | A             | rs1304179<br>2 | <b>&lt;0.0001</b>        | 13.0     | -                           | -          | <b>9.9×10<sup>-14</sup></b>            | 0.25               | -                            | -          | -                          | -                 |
| MYH7B        | A             | rs1304179<br>2 | <b>&lt;0.0001</b>        | 12.7     | <b>4.4×10<sup>-8</sup></b>  | 0.31       | <b>6.3×10<sup>-8</sup></b>             | 0.21               | -                            | -          | <b>4.5×10<sup>-5</sup></b> | 0.17              |
| UQCC1        | A             | rs1304179<br>2 | <b>&lt;0.0001</b>        | -12.2    | -                           | -          | -                                      | -                  | -                            | -          | -                          | -                 |
| CPNE1        | A             | rs1304179<br>2 | <b>&lt;0.0001</b>        | -11.6    | -                           | -          | -                                      | -                  | -                            | -          | -                          | -                 |
| GGT7         | A             | rs1304179<br>2 | <b>&lt;0.0001</b>        | -10.7    | -                           | -          | <b>0.006*</b>                          | -5.16 <sup>z</sup> | <b>7.5×10<sup>-10</sup></b>  | 0.23       | -                          | -                 |
| EIF2S2       | A             | rs1304179<br>2 | <b>&lt;0.0001</b>        | 9.8      | -                           | -          | -                                      | -                  | -                            | -          | -                          | -                 |
| ITCH         | A             | rs1304179<br>2 | <b>&lt;0.0001</b>        | 9.3      | -                           | -          | -                                      | -                  | -                            | -          | -                          | -                 |
| PROCR        | A             | rs1304179<br>2 | -                        | -        | <b>2.8×10<sup>-10</sup></b> | 0.61       | -                                      | -                  | <b>2.5×10<sup>-12</sup></b>  | -0.27      | <b>1.1×10<sup>-6</sup></b> | 0.36              |
| NFS1         | A             | rs1304179<br>2 | -                        | -        | -                           | -          | -                                      | -                  | <b>0.0003</b>                | 0.11       | -                          | -                 |
| GSS          | A             | rs1801310      | -                        | -        | -                           | -          | -                                      | -                  | <b>5.6×10<sup>-11</sup></b>  | 0.20       | -                          | -                 |
| GGT7         | A             | rs1801310      | <b>&lt;0.0001</b>        | 24.9     | -                           | -          | <b>0.00025</b>                         | 0.092              | <b>2.2×10<sup>-20</sup></b>  | -0.28      | -                          | -                 |
| TRPC4AP      | A             | rs1801310      | <b>&lt;0.0001</b>        | -24.9    | -                           | -          | -                                      | -                  | -                            | -          | -                          | -                 |
| UQCC1        | A             | rs1801310      | <b>&lt;0.0001</b>        | 19.7     | -                           | -          | -                                      | -                  | -                            | -          | -                          | -                 |
| EIF6         | A             | rs1801310      | <b>&lt;0.0001</b>        | -12.5    | -                           | -          | -                                      | -                  | -                            | -          | -                          | -                 |
| MAP1LC3<br>A | A             | rs1801310      | <b>&lt;0.0001</b>        | 12.3     | -                           | -          | <b>3.3×10<sup>-8</sup></b>             | -0.16              | <b>1.8×10<sup>-7</sup></b>   | -0.15      | -                          | -                 |
| PROCR        | A             | rs1801310      | <b>&lt;0.0001</b>        | 11.6     | <b>2.4×10<sup>-6</sup></b>  | -0.37      | -                                      | -                  | -                            | -          | -                          | -                 |

|           |   |           |         |       |                      |       |                       |                    |                       |        |                       |                     |
|-----------|---|-----------|---------|-------|----------------------|-------|-----------------------|--------------------|-----------------------|--------|-----------------------|---------------------|
| NCOA6     | A | rs1801310 | <0.0001 | -11.0 | -                    | -     | -                     | -                  | 5.1×10 <sup>-5</sup>  | -0.096 | 0.0001*               | -0.16 <sup>β</sup>  |
| ITCH      | A | rs1801310 | <0.0001 | -10.8 | -                    | -     | -                     | -                  | -                     | -      | -                     | -                   |
| MYH7B     | A | rs1801310 | <0.0001 | -10.0 | -                    | -     | -                     | -                  | -                     | -      | -                     | -                   |
| ACSS2     | A | rs1801310 | -       | -     | -                    | -     | 0.0007*               | 3.97 <sup>z</sup>  | 1.2×10 <sup>-6</sup>  | -0.12  | -                     | -                   |
| PIGU      | A | rs1801310 | -       | -     | -                    | -     | -                     | -                  | 5.9×10 <sup>-5</sup>  | -0.1   | -                     | -                   |
| NFS1      | A | rs1801310 | -       | -     | -                    | -     | -                     | -                  | 0.00011               | -0.092 | -                     | -                   |
| EDEM2     | A | rs1801310 | -       | -     | 1.5×10 <sup>-6</sup> | -0.22 | -                     | -                  | -                     | -      | -                     | -                   |
| MMP24-AS1 | A | rs1801310 | -       | -     | 9.7×10 <sup>-5</sup> | -0.21 | -                     | -                  | -                     | -      | -                     | -                   |
| GSS       | T | rs6088660 | 0.002   | 5.0   | -                    | -     | -                     | -                  | 1.4×10 <sup>-10</sup> | 0.21   | -                     | -                   |
| TRPC4AP   | T | rs6088660 | <0.0001 | 64.2  | -                    | -     | -                     | -                  | -                     | -      | -                     | -                   |
| MAP1LC3A  | T | rs6088660 | <0.0001 | -27.4 | -                    | -     | -                     | -                  | -                     | -      | -                     | -                   |
| EDEM2     | T | rs6088660 | <0.0001 | 18.7  | -                    | -     | 2.6×10 <sup>-5</sup>  | 0.13               | -                     | -      | -                     | -                   |
| NCOA6     | T | rs6088660 | <0.0001 | 12.8  | -                    | -     | -                     | -                  | 0.00022               | 0.091  | -                     | -                   |
| EIF6      | T | rs6088660 | <0.0001 | -12.2 | -                    | -     | -                     | -                  | -                     | -      | -                     | -                   |
| TP53INP2  | T | rs6088660 | <0.0001 | -10.7 | -                    | -     | -                     | -                  | -                     | -      | -                     | -                   |
| GGT7      | T | rs6088660 | <0.0001 | -10.6 | -                    | -     | -                     | -                  | 1.2×10 <sup>-6</sup>  | 0.15   | -                     | -                   |
| MYH7B     | T | rs6088660 | <0.0001 | -6.4  | -                    | -     | -                     | -                  | -                     | -      | -                     | -                   |
| ACSS2     | T | rs6088660 | -       | -     | -                    | -     | -                     | -                  | -                     | -      | 2.5×10 <sup>-6*</sup> | -4.71 <sup>z</sup>  |
| GGT7      | T | rs6119534 | <0.0001 | -17.7 | -                    | -     | 7.3×10 <sup>-6*</sup> | -4.48 <sup>z</sup> | 8.7×10 <sup>-38</sup> | 0.37   | 3.2×10 <sup>-39</sup> | -13.10 <sup>z</sup> |
| MAP1LC3A  | T | rs6119534 | <0.0001 | 21.6  | -                    | -     | 1.7×10 <sup>-24</sup> | 0.27               | 1.5×10 <sup>-7</sup>  | 0.15   | 9.2×10 <sup>-7</sup>  | 0.21                |
| EDEM2     | T | rs6119534 | <0.0001 | -18.9 | 6.1×10 <sup>-8</sup> | 0.25  | -                     | -                  | 2.3×10 <sup>-5</sup>  | -0.085 | -                     | -                   |
| ITCH      | T | rs6119534 | <0.0001 | 14.7  | -                    | -     | -                     | -                  | -                     | -      | -                     | -                   |
| EIF2S2    | T | rs6119534 | <0.0001 | 13.6  | -                    | -     | -                     | -                  | -                     | -      | -                     | -                   |
| UQCCL1    | T | rs6119534 | <0.0001 | -10.5 | -                    | -     | -                     | -                  | -                     | -      | -                     | -                   |

|                 |   |                |                   |       |                            |      |                            |       |                            |       |                             |                    |
|-----------------|---|----------------|-------------------|-------|----------------------------|------|----------------------------|-------|----------------------------|-------|-----------------------------|--------------------|
| <i>PROCR</i>    | T | rs6119534      | <b>&lt;0.0001</b> | -9.1  | <b>2.7×10<sup>-5</sup></b> | 0.34 | -                          | -     | <b>1.5×10<sup>-5</sup></b> | -0.14 | -                           | -                  |
| <i>MYH7B</i>    | T | rs6119534      | <b>&lt;0.0001</b> | 7.8   | <b>4.3×10<sup>-5</sup></b> | 0.19 | -                          | -     | -                          | -     | -                           | -                  |
| <i>ACSS2</i>    | T | rs6119534      | -                 | -     | -                          | -    | -                          | -     | <b>1.5×10<sup>-8</sup></b> | 0.14  | <b>6.0×10<sup>-8*</sup></b> | -5.41 <sup>z</sup> |
| <i>GSS</i>      | T | rs6119534      | -                 | -     | -                          | -    | -                          | -     | <b>0.0002</b>              | 0.12  | -                           | -                  |
| <i>TRPC4AP</i>  | T | rs6119534      | -                 | -     | -                          | -    | -                          | -     |                            |       | <b>3.4×10<sup>-7*</sup></b> | -0.33 <sup>β</sup> |
| <i>GGT7</i>     | A | rs1154615<br>5 | -                 | -     | -                          | -    | <b>0.0001</b>              | -0.13 | -                          | -     | <b>1.2×10<sup>-6*</sup></b> | 4.85 <sup>z</sup>  |
| <i>MAP1LC3A</i> | A | rs1154615<br>5 | <b>&lt;0.0001</b> | -47.7 | -                          | -    | <b>1.6×10<sup>-5</sup></b> | -0.16 | -                          | -     | -                           | -                  |
| <i>TRPC4AP</i>  | A | rs1154615<br>5 | <b>&lt;0.0001</b> | 22.2  | -                          | -    |                            |       | -                          | -     | -                           | -                  |
| <i>NCOA6</i>    | A | rs1154615<br>5 | <b>&lt;0.0001</b> | 16.9  | -                          | -    | <b>3.9×10<sup>-8</sup></b> | 0.26  | -                          | -     | -                           | -                  |
| <i>TP53INP2</i> | A | rs1154615<br>5 | <b>&lt;0.0001</b> | -15.0 | -                          | -    | -                          | -     | -                          | -     | -                           | -                  |
| <i>EDEM2</i>    | A | rs1154615<br>5 | <b>&lt;0.0001</b> | 10.6  | -                          | -    | -                          | -     | -                          | -     | -                           | -                  |
| <i>EIF6</i>     | A | rs1154615<br>5 | <b>&lt;0.0001</b> | -8.6  | -                          | -    | -                          | -     | -                          | -     | -                           | -                  |
| <i>ITCH</i>     | A | rs1154615<br>5 | <b>&lt;0.0001</b> | -7.8  | -                          | -    | -                          | -     | -                          | -     | -                           | -                  |
| <i>GSS</i>      | A | rs1154615<br>5 | <b>0.0007</b>     | 5.2   | -                          | -    | -                          | -     | <b>0.00001</b>             | 0.16  | -                           | -                  |
| <i>PIGU</i>     | A | rs1154615<br>5 | -                 | -     | -                          | -    | -                          | -     | <b>0.00001</b>             | 0.16  | -                           | -                  |

<sup>1</sup> Q-value (false discovery rate) and Z-score statistics for SNP's eQTLs in whole blood obtained from the eQTLGen database (<https://www.eqtlgen.org>).

<sup>2</sup> P-value and NES (normalized effect size) statistics for SNP's eQTLs in T2D-related tissues obtained from the GTEx portal (<https://gtexportal.org>).

\* Statistics for SNP's eQTLs obtained from the QTLbase database (<http://mulinlab.tmu.edu.cn/qtlbase/index.html>); P-value and Z-score or *beta* estimate.
