# Supplementary material for: El secreto judicial y las garantías constitucionales del derecho a un proceso debido
Source: MDPI journal article supplement (doi:10.3390/life11090886), 1988-01-01
Supplement: s1 [file s1]

**Supplementary Table S1.** Linkage disequilibrium between SNPs in the Russian population

| Gene / SNP ID                                                                                                          |            | GSS       |            | GGT7      |            |
|------------------------------------------------------------------------------------------------------------------------|------------|-----------|------------|-----------|------------|
|                                                                                                                        |            | rs6088660 | rs13041792 | rs6119534 | rs11546155 |
| GSS                                                                                                                    | rs1801310  | -0.1086   | -0.0714    | -0.1402   | -0.0331    |
|                                                                                                                        |            | 0.9802    | 0.8986     | 0.8333    | 0.8165     |
|                                                                                                                        | rs6088660  |           | -0.0557    | 0.0615    | 0.0449     |
|                                                                                                                        |            |           | 0.9828     | 0.3813    | 0.6067     |
|                                                                                                                        | rs13041792 |           |            | 0.0922    | -0.0187    |
|                                                                                                                        |            |           |            | 0.7978    | 0.9014     |
| GGT7                                                                                                                   | rs6119534  |           |            |           | -0.0361    |
|                                                                                                                        |            |           |            |           | 0.8228     |
| Upper cells show <i>D</i> -values (gray fill); lower cells show <i>D'</i> -values ( <i>P</i> <2.0×10 <sup>-16</sup> ). |            |           |            |           |            |
