# Supplementary material for: The Link between Type 2 Diabetes Mellitus and the Polymorphisms of Glutathione-Metabolizing Genes Suggests a New Hypothesis Explaining Disease Initiation and Progression
Source: Life (Basel). 2021 Aug 28;11(9):886. doi: 10.3390/life11090886 (PMC8466482; doi:10.3390/life11090886)
Supplement: Supplementary file 1 [file life-11-00886-s001.zip]

Archive with 13 entries (13 files):
- Suppl Table S4.pdf
- Suppl Table S5.xls
- Suppl Table S6.xlsx
- Suppl Table S7.xlsx
- Suppl Table S8.pdf
- Suppl Table S9.xls
- Suppl Table S10.xlsx
- Suppl Data S11.pdf
- Suppl Data S12.pdf
- Suppl Data S13.pdf
- Suppl Table S1.pdf
- Suppl Table S2.pdf
- Suppl Table S3.xlsx
