# Supplementary material for: The Link between Type 2 Diabetes Mellitus and the Polymorphisms of Glutathione-Metabolizing Genes Suggests a New Hypothesis Explaining Disease Initiation and Progression
Source: Life (Basel). 2021 Aug 28;11(9):886. doi: 10.3390/life11090886 (PMC8466482; doi:10.3390/life11090886)
Supplement: Supplementary file 1 [file life-11-00886-s001.zip › Suppl Table S3.xlsx]

## Sheet: Legend
	Supplementary table 3: A replication analysis for SNPs of GGT7 and GSS genes with significant eQTLs (skeletal muscle, GTEx portal) with the risk of T2D in The UK cohort
	NIDDM-GGT7	Replication analysis for SNPs of the GGT7 gene with significant eQTLs (skeletal muscle, GTEx portal) with the risk of non-insulin-dependent diabetes mellitus in The UK cohort
	T2D-GGT7	Replication analysis for SNPs of the GGT7 gene with significant eQTLs (skeletal muscle, GTEx portal) with the risk of type 2 diabetes mellitus in The UK cohort
	NIDDM-GSS	Replication analysis for SNPs of the GSS gene with significant eQTLs (skeletal muscle, GTEx portal) with the risk of non-insulin-dependent diabetes mellitus in The UK cohort
	T2D-GSS	Replication analysis for SNPs of the GSS gene with significant eQTLs (skeletal muscle, GTEx portal) with the risk of type 2 diabetes mellitus in The UK cohort

## Sheet: NIDDM-GGT7
Trait	Variant	Chromosome	Position	Eff. allele	beta	pv	MAF	HWE	imp. score	ORbeta*
E11 Non-insulin-dependent diabetes mellitus	rs4911408	20	32700566	A	0.0016628	9.9984e-05	0.34978	0.1811	0.99832	1.04
E11 Non-insulin-dependent diabetes mellitus	rs6087558	20	32714985	A	0.0016428	0.0001012	0.368879	0.05395	0.998333	1.04
E11 Non-insulin-dependent diabetes mellitus	rs12480839	20	32727430	G	0.0016426	0.00010161	0.368695	0.0385	0.998353	1.04
E11 Non-insulin-dependent diabetes mellitus	rs4911413	20	32721775	A	0.0016416	0.00010249	0.368828	0.04027	0.998292	1.04
E11 Non-insulin-dependent diabetes mellitus	rs4911411	20	32715842	T	0.0016402	0.00010406	0.368889	0.05214	0.997957	1.04
E11 Non-insulin-dependent diabetes mellitus	rs2143230	20	32724345	T	0.0016398	0.00010431	0.368722	0.03884	0.998366	1.04
E11 Non-insulin-dependent diabetes mellitus	rs2206448	20	32709525	A	0.0016359	0.00010824	0.368798	0.05531	0.998169	1.04
E11 Non-insulin-dependent diabetes mellitus	rs4911410	20	32710974	A	0.001635	0.00010925	0.36892	0.05966	0.998035	1.04
E11 Non-insulin-dependent diabetes mellitus	rs4911409	20	32710710	A	0.0016327	0.00011168	0.368897	0.05917	0.997982	1.04
E11 Non-insulin-dependent diabetes mellitus	rs4911405	20	32674967	T	0.0016495	0.00011674	0.348601	0.1952	0.995709	1.04
E11 Non-insulin-dependent diabetes mellitus	rs6059662	20	32675727	G	0.0016552	0.00012227	0.344362	0.4056	0.987705	1.04
E11 Non-insulin-dependent diabetes mellitus	rs4911407	20	32683565	A	0.0016374	0.00012582	0.350185	0.1741	0.9995	1.04
E11 Non-insulin-dependent diabetes mellitus	rs6142102	20	32704627	G	0.0016176	0.00013013	0.368594	0.1391	0.99725	1.04
E11 Non-insulin-dependent diabetes mellitus	rs6142097	20	32687882	G	0.0016332	0.00013079	0.350138	0.166	0.999648	1.04
E11 Non-insulin-dependent diabetes mellitus	rs8123521	20	32668885	C	0.0016249	0.00014223	0.3498	0.1646	0.99948	1.04
E11 Non-insulin-dependent diabetes mellitus	rs4911147	20	32667607	A	0.0016245	0.00014286	0.349809	0.1657	0.999307	1.04
E11 Non-insulin-dependent diabetes mellitus	rs2235597	20	32665614	T	0.0016234	0.0001444	0.34989	0.1623	0.999098	1.04
E11 Non-insulin-dependent diabetes mellitus	rs4911401	20	32654562	A	0.0016202	0.00014832	0.349993	0.1504	0.999675	1.04
E11 Non-insulin-dependent diabetes mellitus	rs2268088	20	32649064	T	0.0016161	0.00015507	0.349458	0.1216	0.999641	1.04
E11 Non-insulin-dependent diabetes mellitus	rs6059639	20	32619136	G	0.0016146	0.00015635	0.350108	0.1705	0.999516	1.04
E11 Non-insulin-dependent diabetes mellitus	rs6059651	20	32645052	C	0.0016144	0.00015713	0.349578	0.1245	0.999833	1.04
E11 Non-insulin-dependent diabetes mellitus	rs2284387	20	32644588	A	0.0016139	0.00015791	0.349581	0.1255	0.999866	1.04
E11 Non-insulin-dependent diabetes mellitus	rs2284388	20	32655741	G	0.001613	0.00015891	0.349836	0.1493	0.999692	1.04
E11 Non-insulin-dependent diabetes mellitus	rs4911146	20	32640047	G	0.0016125	0.0001601	0.349583	0.143	0.999697	1.04
E11 Non-insulin-dependent diabetes mellitus	rs2235596	20	32684309	A	0.0016089	0.00016366	0.350819	0.1709	0.99916	1.04
E11 Non-insulin-dependent diabetes mellitus	rs909884	20	32646063	T	0.0016101	0.00016373	0.349535	0.134	0.999796	1.04
E11 Non-insulin-dependent diabetes mellitus	rs6059649	20	32643877	T	0.001607	0.00016855	0.34951	0.1291	0.999783	1.04
E11 Non-insulin-dependent diabetes mellitus	rs2284378	20	32588095	C	0.0016123	0.00016894	0.349	0.0003721	genotyped	1.04
E11 Non-insulin-dependent diabetes mellitus	rs6087557	20	32698275	C	0.0016053	0.0001701	0.350734	0.1744	0.998744	1.04
E11 Non-insulin-dependent diabetes mellitus	rs6120519	20	32688113	G	0.0016046	0.00017013	0.350876	0.1781	0.999343	1.04
E11 Non-insulin-dependent diabetes mellitus	rs6142098	20	32688294	C	0.0016038	0.00017161	0.350798	0.1721	0.99932	1.04
E11 Non-insulin-dependent diabetes mellitus	rs2268080	20	32597716	A	0.0016028	0.00017442	0.35	0.1682	0.999804	1.04
E11 Non-insulin-dependent diabetes mellitus	rs1555075	20	32610401	C	0.0016018	0.00017607	0.349958	0.174	0.999863	1.04
E11 Non-insulin-dependent diabetes mellitus	rs4911143	20	32607854	G	0.0016017	0.00017608	0.349972	0.1717	0.999954	1.04
E11 Non-insulin-dependent diabetes mellitus	rs2300206	20	32589808	C	0.0016004	0.0001783	0.349955	0.1705	0.999959	1.04
E11 Non-insulin-dependent diabetes mellitus	rs2284377	20	32586682	C	0.0016004	0.00017834	0.349952	0.1693	0.999964	1.04
E11 Non-insulin-dependent diabetes mellitus	rs2284379	20	32594642	C	0.0016	0.00017901	0.349955	0.1717	0.999907	1.04
E11 Non-insulin-dependent diabetes mellitus	rs2056990	20	32623464	T	0.0015995	0.00017963	0.350126	0.1637	0.999684	1.04
E11 Non-insulin-dependent diabetes mellitus	rs4911397	20	32607846	G	0.0015994	0.00018002	0.349943	0.174	0.99987	1.04
E11 Non-insulin-dependent diabetes mellitus	rs1007090	20	32582871	C	0.0015994	0.00018061	0.349841	0.1788	0.999621	1.04
E11 Non-insulin-dependent diabetes mellitus	rs11907546	20	32719797	T	0.0015783	0.00018356	0.374754	0.02726	0.994864	1.04
E11 Non-insulin-dependent diabetes mellitus	rs2268089	20	32667298	C	0.0015947	0.00018772	0.350463	0.1888	0.99921	1.04
E11 Non-insulin-dependent diabetes mellitus	rs6119447	20	32668576	G	0.001593	0.00019077	0.350471	0.1827	0.999167	1.04
E11 Non-insulin-dependent diabetes mellitus	rs6120487	20	32622608	G	0.0015812	0.00021141	0.350749	0.1804	0.999855	1.04
E11 Non-insulin-dependent diabetes mellitus	rs8119937	20	32645551	T	0.0015802	0.00021479	0.35021	0.1402	0.999805	1.04
E11 Non-insulin-dependent diabetes mellitus	rs2300205	20	32589780	T	0.0015795	0.00021491	0.350766	0.1756	0.999619	1.04
E11 Non-insulin-dependent diabetes mellitus	rs6059583	20	32532114	G	0.001574	0.00021658	0.355346	0.4068	0.999286	1.04
E11 Non-insulin-dependent diabetes mellitus	rs2284389	20	32656841	G	0.0015777	0.00021895	0.350555	0.1684	0.999692	1.04
E11 Non-insulin-dependent diabetes mellitus	rs3787230	20	32640272	G	0.0015761	0.00022296	0.350386	0.1443	0.999489	1.04
E11 Non-insulin-dependent diabetes mellitus	rs1883524	20	32626107	A	0.0015739	0.0002261	0.350758	0.1817	0.999751	1.04
E11 Non-insulin-dependent diabetes mellitus	rs2223553	20	32709444	A	0.0015192	0.00022862	0.427747	0.1374	0.998173	1.04
E11 Non-insulin-dependent diabetes mellitus	rs2300204	20	32588773	A	0.0015722	0.0002301	0.35063	0.1865	0.999696	1.04
E11 Non-insulin-dependent diabetes mellitus	rs1055857	20	32613873	G	0.0015716	0.00023133	0.350626	0.1865	0.999712	1.04
E11 Non-insulin-dependent diabetes mellitus	rs68051854	20	32701956	C	0.001514	0.00023895	0.427722	0.2347	0.998861	1.04
E11 Non-insulin-dependent diabetes mellitus	rs2284386	20	32644396	A	0.0015684	0.00024576	0.3502	0.03028	genotyped	1.04
E11 Non-insulin-dependent diabetes mellitus	rs11696338	20	32687611	C	0.0015147	0.00026535	0.4096	0.1513	genotyped	1.04
E11 Non-insulin-dependent diabetes mellitus	rs4911390	20	32565207	C	0.0015559	0.000269	0.350689	0.2046	0.998417	1.04
E11 Non-insulin-dependent diabetes mellitus	rs4911385	20	32558593	A	0.0015554	0.00026976	0.350822	0.2074	0.998523	1.04
E11 Non-insulin-dependent diabetes mellitus	rs79566357	20	33782642	C	0.0033409	0.00027148	0.05178	0.2104	genotyped	1.08
E11 Non-insulin-dependent diabetes mellitus	rs4911389	20	32565041	G	0.001553	0.00027626	0.350701	0.2087	0.99837	1.04
E11 Non-insulin-dependent diabetes mellitus	rs4911394	20	32577327	T	0.0015504	0.00028057	0.350874	0.2129	0.999429	1.04
E11 Non-insulin-dependent diabetes mellitus	rs6057961	20	32573811	G	0.0015478	0.00028749	0.35081	0.217	0.999353	1.04
E11 Non-insulin-dependent diabetes mellitus	rs6142055	20	32539806	C	0.0014998	0.00029109	0.414714	0.4329	0.996318	1.04
E11 Non-insulin-dependent diabetes mellitus	rs932388	20	32657378	T	0.0015039	0.00029267	0.4073	0.1053	genotyped	1.04
E11 Non-insulin-dependent diabetes mellitus	rs4911148	20	32668244	G	0.0014914	0.00032105	0.409913	0.3113	0.998397	1.04
E11 Non-insulin-dependent diabetes mellitus	rs2268086	20	32648738	G	0.0014898	0.00032547	0.408803	0.2026	0.999708	1.04
E11 Non-insulin-dependent diabetes mellitus	rs6142101	20	32697845	A	0.0014892	0.0003258	0.409884	0.2171	0.999534	1.04
E11 Non-insulin-dependent diabetes mellitus	rs4911402	20	32667645	G	0.0014894	0.00032591	0.409167	0.2559	0.999565	1.04
E11 Non-insulin-dependent diabetes mellitus	rs17092414	20	33777756	T	-0.0032846	0.00033436	0.052434	0.1998	0.988993	0.925
E11 Non-insulin-dependent diabetes mellitus	rs4911404	20	32673037	A	0.0014863	0.0003359	0.409676	0.2318	0.998921	1.04
E11 Non-insulin-dependent diabetes mellitus	rs6059586	20	32540501	A	0.0015267	0.00033885	0.35549	0.3891	0.99555	1.04
E11 Non-insulin-dependent diabetes mellitus	rs6059596	20	32557119	T	0.0015283	0.00034706	0.350786	0.2005	0.997354	1.04
E11 Non-insulin-dependent diabetes mellitus	rs4911383	20	32555779	G	0.001525	0.00035787	0.350738	0.2687	0.997044	1.04
E11 Non-insulin-dependent diabetes mellitus	rs6059581	20	32528388	A	0.0015194	0.00036058	0.356578	0.4074	0.9952	1.04
E11 Non-insulin-dependent diabetes mellitus	rs6088360	20	32557189	G	0.0015237	0.00036213	0.350619	0.1876	0.997407	1.04
E11 Non-insulin-dependent diabetes mellitus	rs6120463	20	32556389	C	0.0015235	0.0003628	0.350774	0.2304	0.997029	1.04
E11 Non-insulin-dependent diabetes mellitus	rs6141444	20	32607610	A	0.0014769	0.00036498	0.409358	0.243	0.999836	1.04
E11 Non-insulin-dependent diabetes mellitus	rs4911392	20	32570518	C	0.0015206	0.00036515	0.351491	0.2404	0.999042	1.04
E11 Non-insulin-dependent diabetes mellitus	rs4911393	20	32570926	G	0.0015206	0.00036515	0.351491	0.2404	0.999042	1.04
E11 Non-insulin-dependent diabetes mellitus	rs1054534	20	32605327	C	0.0014768	0.00036525	0.409321	0.2473	0.999877	1.04
E11 Non-insulin-dependent diabetes mellitus	rs4911399	20	32623418	A	0.0014752	0.00037029	0.409451	0.2416	0.999839	1.04
E11 Non-insulin-dependent diabetes mellitus	rs4911145	20	32615223	G	0.0014742	0.00037465	0.409363	0.2444	0.999648	1.04
E11 Non-insulin-dependent diabetes mellitus	rs6142051	20	32533018	C	0.0014679	0.00038074	0.4168	0.393	genotyped	1.04
E11 Non-insulin-dependent diabetes mellitus	rs2300209	20	32643100	C	0.0014685	0.00039394	0.409964	0.1861	0.999786	1.04
E11 Non-insulin-dependent diabetes mellitus	rs1319363	20	32541876	A	0.0015068	0.0004059	0.355027	0.3608	0.996747	1.04
E11 Non-insulin-dependent diabetes mellitus	rs2268079	20	32596750	G	0.001463	0.00041261	0.410488	0.2267	0.999713	1.04
E11 Non-insulin-dependent diabetes mellitus	rs6057957	20	32549858	G	0.0015025	0.00042358	0.354499	0.3886	0.996782	1.04
E11 Non-insulin-dependent diabetes mellitus	rs2377957	20	32554473	G	0.0015056	0.00042433	0.351286	0.2468	0.995573	1.04
E11 Non-insulin-dependent diabetes mellitus	rs6059587	20	32542926	C	0.0015009	0.00042791	0.354877	0.3868	0.997012	1.04
E11 Non-insulin-dependent diabetes mellitus	rs2377955	20	32525370	G	0.0014999	0.00043673	0.355453	0.5389	0.993499	1.04
E11 Non-insulin-dependent diabetes mellitus	rs6088355	20	32545887	G	0.0014935	0.00045642	0.354991	0.3848	0.997011	1.04
E11 Non-insulin-dependent diabetes mellitus	rs6059579	20	32527865	G	0.0014373	0.00051932	0.417073	0.5002	0.993341	1.03
E11 Non-insulin-dependent diabetes mellitus	rs4911375	20	32516022	A	0.0014835	0.00051981	0.355724	0.3875	0.988419	1.04
E11 Non-insulin-dependent diabetes mellitus	rs6059580	20	32527873	C	0.0014355	0.00052808	0.417018	0.4913	0.993554	1.03
E11 Non-insulin-dependent diabetes mellitus	rs6120440	20	32517585	A	0.0014776	0.00053827	0.356126	0.3795	0.990441	1.04
E11 Non-insulin-dependent diabetes mellitus	rs761238	20	32519988	T	0.0014763	0.00054242	0.356125	0.3876	0.99169	1.04
E11 Non-insulin-dependent diabetes mellitus	rs4911374	20	32516001	C	0.0014773	0.00054887	0.355659	0.3694	0.989477	1.04
E11 Non-insulin-dependent diabetes mellitus	rs6059558	20	32516830	C	0.0014753	0.00054995	0.356073	0.3636	0.99102	1.04
E11 Non-insulin-dependent diabetes mellitus	rs6057945	20	32517180	T	0.0014751	0.00055237	0.356293	0.3675	0.990348	1.04
E11 Non-insulin-dependent diabetes mellitus	rs9679981	20	32514914	G	0.0014745	0.00055454	0.356091	0.3315	0.990975	1.04
E11 Non-insulin-dependent diabetes mellitus	rs6059555	20	32514324	C	0.0014741	0.00055681	0.356094	0.3428	0.990913	1.04
E11 Non-insulin-dependent diabetes mellitus	rs6059554	20	32514092	A	0.0014741	0.00055704	0.356086	0.3409	0.990842	1.04
E11 Non-insulin-dependent diabetes mellitus	rs6142069	20	32560542	A	0.0014283	0.00056503	0.411386	0.3205	0.998459	1.03
E11 Non-insulin-dependent diabetes mellitus	rs6141437	20	32558855	T	0.0014282	0.00056557	0.411381	0.3205	0.998422	1.03
E11 Non-insulin-dependent diabetes mellitus	rs761236	20	32520051	G	0.0014716	0.00056576	0.355755	0.3915	0.992136	1.04
E11 Non-insulin-dependent diabetes mellitus	rs725478	20	32518354	A	0.001471	0.00057003	0.356041	0.3674	0.99166	1.04
E11 Non-insulin-dependent diabetes mellitus	rs973409	20	32536364	C	0.0014701	0.00057151	0.3545	0.02123	genotyped	1.04
E11 Non-insulin-dependent diabetes mellitus	rs761233	20	32568886	G	0.0014169	0.00062823	0.411719	0.3102	0.997625	1.03
E11 Non-insulin-dependent diabetes mellitus	rs4911396	20	32579945	G	0.0014077	0.00067523	0.411369	0.3137	0.999328	1.03
E11 Non-insulin-dependent diabetes mellitus	rs6059574	20	32523172	G	0.0014465	0.00068282	0.362664	0.6167	0.986197	1.04
E11 Non-insulin-dependent diabetes mellitus	rs4911395	20	32579901	G	0.0014045	0.00069466	0.411381	0.3069	0.999326	1.03
E11 Non-insulin-dependent diabetes mellitus	rs6142068	20	32557172	C	0.0014049	0.00070417	0.411391	0.4785	0.994431	1.03
E11 Non-insulin-dependent diabetes mellitus	rs4911137	20	32535463	T	0.0013974	0.00071112	0.41859	0.9608	0.998353	1.03
E11 Non-insulin-dependent diabetes mellitus	rs6141431	20	32540314	A	0.0013994	0.00071161	0.418231	0.7545	0.995324	1.03
E11 Non-insulin-dependent diabetes mellitus	rs6142067	20	32556572	T	0.0013801	0.00086032	0.413546	0.4596	0.995335	1.03
E11 Non-insulin-dependent diabetes mellitus	rs9753690	20	32540801	G	0.0013758	0.00087827	0.417655	0.6886	0.995086	1.03
E11 Non-insulin-dependent diabetes mellitus	rs4012234	20	32553047	G	0.0013726	0.00091083	0.415399	0.5332	0.99601	1.03
E11 Non-insulin-dependent diabetes mellitus	rs6141436	20	32554571	A	0.0013722	0.0009181	0.414213	0.4877	0.996146	1.03
E11 Non-insulin-dependent diabetes mellitus	rs4911382	20	32553095	T	0.0013716	0.00091814	0.415386	0.5379	0.996055	1.03
E11 Non-insulin-dependent diabetes mellitus	rs4911384	20	32555807	T	0.0013689	0.00094576	0.414209	0.501	0.996113	1.03
E11 Non-insulin-dependent diabetes mellitus	rs4911136	20	32525872	T	0.0013596	0.0010056	0.419656	0.8526	0.994352	1.03
E11 Non-insulin-dependent diabetes mellitus	rs6142050	20	32527128	A	0.0013561	0.001034	0.419765	0.9218	0.994708	1.03
E11 Non-insulin-dependent diabetes mellitus	rs7263727	20	32540939	C	0.0013547	0.0010506	0.417785	0.6809	0.996022	1.03
E11 Non-insulin-dependent diabetes mellitus	rs6142056	20	32541155	C	0.0013544	0.0010536	0.417723	0.7357	0.996027	1.03
E11 Non-insulin-dependent diabetes mellitus	rs6059577	20	32527686	C	0.0013533	0.0010581	0.41969	0.9163	0.994879	1.03
E11 Non-insulin-dependent diabetes mellitus	rs1883707	20	32552587	T	0.0013537	0.0010657	0.417962	0.6528	0.99515	1.03
E11 Non-insulin-dependent diabetes mellitus	rs2050208	20	32543573	G	0.0013505	0.0010901	0.417814	0.668	0.996074	1.03
E11 Non-insulin-dependent diabetes mellitus	rs6142060	20	32544846	C	0.0013505	0.0010907	0.417827	0.6502	0.995992	1.03
E11 Non-insulin-dependent diabetes mellitus	rs7270891	20	32542116	A	0.0013498	0.0010965	0.41783	0.668	0.996043	1.03
E11 Non-insulin-dependent diabetes mellitus	rs6141434	20	32551247	G	0.0013495	0.0010988	0.417893	0.6452	0.996051	1.03
E11 Non-insulin-dependent diabetes mellitus	rs6141435	20	32551279	A	0.0013495	0.001099	0.417893	0.6452	0.996049	1.03
E11 Non-insulin-dependent diabetes mellitus	rs4911381	20	32550345	C	0.0013495	0.0010994	0.417892	0.6477	0.996052	1.03
E11 Non-insulin-dependent diabetes mellitus	rs6142058	20	32542801	G	0.0013475	0.0011182	0.417806	0.668	0.996116	1.03
E11 Non-insulin-dependent diabetes mellitus	rs4911139	20	32551535	A	0.0013463	0.0011292	0.417852	0.6477	0.996061	1.03
E11 Non-insulin-dependent diabetes mellitus	rs4911138	20	32547699	T	0.0013451	0.0011407	0.417954	0.6452	0.996053	1.03
E11 Non-insulin-dependent diabetes mellitus	rs4243974	20	32547868	C	0.0013451	0.0011412	0.417953	0.6427	0.99605	1.03
E11 Non-insulin-dependent diabetes mellitus	rs6141433	20	32548862	C	0.0013451	0.0011412	0.417953	0.6327	0.996035	1.03
E11 Non-insulin-dependent diabetes mellitus	rs6142061	20	32548335	G	0.0013449	0.001143	0.417957	0.6402	0.996008	1.03
E11 Non-insulin-dependent diabetes mellitus	rs6142062	20	32548512	G	0.0013447	0.0011446	0.417949	0.6402	0.996041	1.03
E11 Non-insulin-dependent diabetes mellitus	rs6141432	20	32548597	G	0.0013449	0.0011447	0.417923	0.6377	0.995888	1.03
E11 Non-insulin-dependent diabetes mellitus	rs4911380	20	32546224	T	0.0013439	0.0011516	0.417869	0.6964	0.996116	1.03
E11 Non-insulin-dependent diabetes mellitus	rs6142064	20	32549845	T	0.0013407	0.0011851	0.417785	0.663	0.995956	1.03
E11 Non-insulin-dependent diabetes mellitus	rs9753679	20	32540860	A	0.0013406	0.0011852	0.418024	0.7331	0.99551	1.03
E11 Non-insulin-dependent diabetes mellitus	rs4911403	20	32672949	A	0.0013028	0.0015652	0.435592	0.188	0.994766	1.03
E11 Non-insulin-dependent diabetes mellitus	rs6142046	20	32514061	T	0.0013062	0.0016154	0.420162	0.8968	0.989912	1.03
E11 Non-insulin-dependent diabetes mellitus	rs6088409	20	32734785	G	-0.0012909	0.0044171	0.282055	0.09424	0.997208	0.97
E11 Non-insulin-dependent diabetes mellitus	rs6142071	20	32561487	T	0.0010802	0.0080743	0.484106	0.6397	0.998394	1.03
E11 Non-insulin-dependent diabetes mellitus	rs6142096	20	32686658	A	0.0010753	0.008403	0.481343	0.5865	0.998021	1.03
E11 Non-insulin-dependent diabetes mellitus	rs761234	20	32568885	T	0.0010681	0.0088397	0.484382	0.6274	0.997746	1.03
E11 Non-insulin-dependent diabetes mellitus	rs11697165	20	32573284	T	0.0010631	0.0091122	0.484085	0.6178	0.999214	1.03
E11 Non-insulin-dependent diabetes mellitus	rs6057994	20	32743463	G	-0.0011872	0.0091531	0.277526	0.09883	0.998267	0.972
E11 Non-insulin-dependent diabetes mellitus	rs6142078	20	32573900	T	0.0010612	0.0092469	0.484112	0.6178	0.99901	1.03
E11 Non-insulin-dependent diabetes mellitus	rs1015362	20	32738612	C	0.0011822	0.0094905	0.2775	0.02057	genotyped	1.03
E11 Non-insulin-dependent diabetes mellitus	rs3765435	20	32678043	A	0.0010578	0.0095014	0.482172	0.575	0.99837	1.03
E11 Non-insulin-dependent diabetes mellitus	rs6059691	20	32736967	G	-0.0011786	0.0096422	0.277551	0.09884	0.999014	0.972
E11 Non-insulin-dependent diabetes mellitus	rs2268084	20	32631388	C	0.001055	0.0096747	0.482298	0.5117	0.999306	1.03
E11 Non-insulin-dependent diabetes mellitus	rs6142100	20	32697539	G	0.001052	0.0098935	0.482128	0.5821	0.998776	1.03
E11 Non-insulin-dependent diabetes mellitus	rs6088411	20	32739907	C	-0.0011734	0.0099621	0.277562	0.098	0.999282	0.972
E11 Non-insulin-dependent diabetes mellitus	rs55845370	20	33433629	G	0.0010902	0.010711	0.355042	0.4482	0.988141	1.03
E11 Non-insulin-dependent diabetes mellitus	rs2268082	20	32603927	A	0.0010416	0.01073	0.4829	0.666	genotyped	1.03
E11 Non-insulin-dependent diabetes mellitus	rs117344844	20	33505849	G	0.0029981	0.012565	0.0301191	0.2122	0.977969	1.07
E11 Non-insulin-dependent diabetes mellitus	rs12626122	20	33425800	G	0.0010376	0.013772	0.374328	0.838	0.994259	1.03
E11 Non-insulin-dependent diabetes mellitus	rs56244533	20	33434252	A	0.00099792	0.017199	0.382961	0.9051	0.996423	1.02
E11 Non-insulin-dependent diabetes mellitus	rs6088595	20	33358499	A	0.0009974	0.017585	0.376878	0.8416	0.997054	1.02
E11 Non-insulin-dependent diabetes mellitus	rs117346604	20	33496628	C	0.0028495	0.017887	0.0299279	0.2336	0.980983	1.07
E11 Non-insulin-dependent diabetes mellitus	rs2236270	20	33523155	T	0.00099182	0.018794	0.381959	0.7802	0.982611	1.02
E11 Non-insulin-dependent diabetes mellitus	rs6088617	20	33408036	A	0.0009747	0.01969	0.386823	0.8998	0.998065	1.02
E11 Non-insulin-dependent diabetes mellitus	rs6087631	20	33403509	C	0.00097141	0.020036	0.386874	0.8799	0.999174	1.02
E11 Non-insulin-dependent diabetes mellitus	rs6087632	20	33407704	C	0.00097072	0.020183	0.387017	0.9141	0.998141	1.02
E11 Non-insulin-dependent diabetes mellitus	rs6088620	20	33412022	G	0.00096796	0.02063	0.386712	0.897	0.996966	1.02
E11 Non-insulin-dependent diabetes mellitus	rs2180276	20	33360785	A	0.00096152	0.021396	0.387065	0.9083	0.997766	1.02
E11 Non-insulin-dependent diabetes mellitus	rs6120727	20	33374102	C	0.00096033	0.021533	0.38697	0.8941	0.998299	1.02
E11 Non-insulin-dependent diabetes mellitus	rs7267403	20	33372856	A	0.0009601	0.021562	0.386975	0.8855	0.998334	1.02
E11 Non-insulin-dependent diabetes mellitus	rs6087626	20	33347328	T	0.00096002	0.021564	0.387214	0.9112	0.998082	1.02
E11 Non-insulin-dependent diabetes mellitus	rs6119524	20	33373813	T	0.00095995	0.021582	0.386977	0.8827	0.998341	1.02
E11 Non-insulin-dependent diabetes mellitus	rs11698996	20	33449739	G	0.00096713	0.021638	0.372532	0.9913	0.996902	1.02
E11 Non-insulin-dependent diabetes mellitus	rs6120723	20	33364655	T	0.00095952	0.021641	0.386979	0.8798	0.998302	1.02
E11 Non-insulin-dependent diabetes mellitus	rs6088607	20	33378733	T	0.00095949	0.021656	0.38699	0.8969	0.998193	1.02
E11 Non-insulin-dependent diabetes mellitus	rs28542147	20	33376323	A	0.00095932	0.02167	0.386971	0.8827	0.99831	1.02
E11 Non-insulin-dependent diabetes mellitus	rs13041059	20	33366641	G	0.00095846	0.021789	0.386974	0.8855	0.998283	1.02
E11 Non-insulin-dependent diabetes mellitus	rs6119522	20	33366481	A	0.00095851	0.021794	0.387045	0.8827	0.998036	1.02
E11 Non-insulin-dependent diabetes mellitus	rs2076668	20	33437621	G	-0.00096137	0.022245	0.379	0.08074	genotyped	0.977
E11 Non-insulin-dependent diabetes mellitus	rs6120724	20	33366470	T	0.00095422	0.022621	0.386202	0.9026	0.995593	1.02
E11 Non-insulin-dependent diabetes mellitus	rs6119530	20	33403930	G	0.00095216	0.022654	0.386633	0.8884	0.999076	1.02
E11 Non-insulin-dependent diabetes mellitus	rs6119516	20	33328024	T	0.00094668	0.023425	0.387586	0.8488	0.998077	1.02
E11 Non-insulin-dependent diabetes mellitus	rs6058111	20	33310999	C	0.00094495	0.023686	0.38763	0.8544	0.997899	1.02
E11 Non-insulin-dependent diabetes mellitus	rs6120705	20	33313740	C	0.00094419	0.023805	0.387446	0.86	0.998003	1.02
E11 Non-insulin-dependent diabetes mellitus	rs6087623	20	33317662	G	0.00094346	0.023912	0.387439	0.8629	0.998042	1.02
E11 Non-insulin-dependent diabetes mellitus	rs11698977	20	33449691	T	0.00094583	0.023994	0.381834	0.9394	0.997502	1.02
E11 Non-insulin-dependent diabetes mellitus	rs6120730	20	33385102	C	0.0009412	0.024297	0.386738	0.894	0.998266	1.02
E11 Non-insulin-dependent diabetes mellitus	rs6088590	20	33313566	C	0.00094056	0.024346	0.387476	0.8544	0.997764	1.02
E11 Non-insulin-dependent diabetes mellitus	rs142023093	20	33475850	A	0.002713	0.024637	0.0297447	0.2832	0.980407	1.07
E11 Non-insulin-dependent diabetes mellitus	rs2295353	20	33356511	T	0.00093892	0.024641	0.386749	0.8855	0.998273	1.02
E11 Non-insulin-dependent diabetes mellitus	rs6120708	20	33335526	A	0.00093864	0.024645	0.387849	0.8827	0.99764	1.02
E11 Non-insulin-dependent diabetes mellitus	rs2295354	20	33356541	C	0.00093886	0.02465	0.386748	0.8883	0.998286	1.02
E11 Non-insulin-dependent diabetes mellitus	rs13040449	20	33358901	A	0.00093859	0.024748	0.386466	0.8627	0.997572	1.02
E11 Non-insulin-dependent diabetes mellitus	rs10048849	20	33419680	T	0.0009389	0.024952	0.384887	0.7892	0.995916	1.02
E11 Non-insulin-dependent diabetes mellitus	rs35393655	20	33452915	A	0.00093061	0.026406	0.38178	0.845	0.996812	1.02
E11 Non-insulin-dependent diabetes mellitus	rs1998028	20	33344595	T	0.00092522	0.026787	0.38719	0.8628	0.997999	1.02
E11 Non-insulin-dependent diabetes mellitus	rs6119534	20	33441257	T	0.00092834	0.02689	0.379067	0.6876	0.997563	1.02
E11 Non-insulin-dependent diabetes mellitus	rs11696546	20	33452999	G	0.00092682	0.026964	0.382059	0.8907	0.997365	1.02
E11 Non-insulin-dependent diabetes mellitus	rs6119512	20	33306904	C	0.00092264	0.027224	0.387235	0.8685	0.997844	1.02
E11 Non-insulin-dependent diabetes mellitus	rs6088624	20	33436852	A	0.00092442	0.027275	0.381806	0.8594	0.998869	1.02
E11 Non-insulin-dependent diabetes mellitus	rs6087625	20	33342477	A	0.00092223	0.027285	0.387213	0.86	0.997976	1.02
E11 Non-insulin-dependent diabetes mellitus	rs3787222	20	33333040	A	0.00092136	0.027477	0.387096	0.86	0.997449	1.02
E11 Non-insulin-dependent diabetes mellitus	rs6087639	20	33443866	A	0.0009204	0.027936	0.382081	0.8566	0.998738	1.02
E11 Non-insulin-dependent diabetes mellitus	rs67159833	20	33488079	C	0.00092818	0.027981	0.367528	0.8286	0.99643	1.02
E11 Non-insulin-dependent diabetes mellitus	rs6119535	20	33442138	C	0.00091929	0.028051	0.382635	0.8595	0.998466	1.02
E11 Non-insulin-dependent diabetes mellitus	rs6120742	20	33435827	C	0.00091634	0.028618	0.38239	0.8171	0.997958	1.02
E11 Non-insulin-dependent diabetes mellitus	rs7262834	20	33400913	T	0.0009099	0.029353	0.388572	0.7518	0.997725	1.02
E11 Non-insulin-dependent diabetes mellitus	rs6120747	20	33449769	C	0.00091127	0.029766	0.380759	0.8223	0.997148	1.02
E11 Non-insulin-dependent diabetes mellitus	rs6120750	20	33465289	C	0.000908	0.030167	0.381884	0.9424	0.998546	1.02
E11 Non-insulin-dependent diabetes mellitus	rs73095129	20	33583717	A	0.0024195	0.030204	0.0353485	0.1437	0.97139	1.06
E11 Non-insulin-dependent diabetes mellitus	rs55753039	20	33394940	T	0.00089758	0.03165	0.388619	0.7572	0.99717	1.02
E11 Non-insulin-dependent diabetes mellitus	rs6088521	20	33133184	C	0.00088011	0.033375	0.476982	0.3137	0.969652	1.02
E11 Non-insulin-dependent diabetes mellitus	rs73099541	20	33731022	T	-0.0022227	0.040665	0.03645	0.1842	genotyped	0.948
E11 Non-insulin-dependent diabetes mellitus	rs6142137	20	32903904	C	0.00084287	0.042556	0.42853	0.6446	0.977169	1.02
E11 Non-insulin-dependent diabetes mellitus	rs79084221	20	32463452	G	-0.0019029	0.043774	0.0516971	0.5758	0.946847	0.956
E11 Non-insulin-dependent diabetes mellitus	rs6142059	20	32544327	C	0.0008085	0.047408	0.492499	0.4725	0.995693	1.02
E11 Non-insulin-dependent diabetes mellitus	rs910870	20	33292893	C	0.00082457	0.047867	0.39444	0.8302	0.996997	1.02
E11 Non-insulin-dependent diabetes mellitus	rs6058108	20	33288655	G	0.00080029	0.05485	0.395269	0.7614	0.99567	1.02
E11 Non-insulin-dependent diabetes mellitus	rs13044142	20	33482040	T	-0.001426	0.055759	0.0850205	0.9379	0.953437	0.967
E11 Non-insulin-dependent diabetes mellitus	rs4911445	20	33378752	C	-0.0007824	0.056929	0.430336	0.725	0.998359	0.982
E11 Non-insulin-dependent diabetes mellitus	rs6060038	20	33357715	A	-0.00078219	0.057002	0.430052	0.7832	0.998467	0.982
E11 Non-insulin-dependent diabetes mellitus	rs6060039	20	33357945	T	-0.00078153	0.057225	0.429844	0.7965	0.998375	0.982
E11 Non-insulin-dependent diabetes mellitus	rs4911444	20	33378448	G	-0.00078146	0.05723	0.430329	0.7302	0.99832	0.982
E11 Non-insulin-dependent diabetes mellitus	rs6060048	20	33370266	C	-0.00078031	0.05761	0.430054	0.7966	0.998411	0.982
E11 Non-insulin-dependent diabetes mellitus	rs2424997	20	33384805	G	0.00077948	0.057861	0.430323	0.7329	0.998384	1.02
E11 Non-insulin-dependent diabetes mellitus	rs2378337	20	33771435	A	0.00077861	0.058303	0.4385	0.05844	genotyped	1.02
E11 Non-insulin-dependent diabetes mellitus	rs6058198	20	33748253	A	0.00077671	0.058593	0.437239	0.3743	0.997865	1.02
E11 Non-insulin-dependent diabetes mellitus	rs910869	20	33292777	T	0.00078808	0.058734	0.393556	0.8665	0.996534	1.02
E11 Non-insulin-dependent diabetes mellitus	rs6060052	20	33382665	G	0.0007751	0.059305	0.430185	0.725	0.998331	1.02
E11 Non-insulin-dependent diabetes mellitus	rs11167245	20	33371537	C	-0.00077456	0.059467	0.430125	0.7752	0.998457	0.982
E11 Non-insulin-dependent diabetes mellitus	rs1986110	20	33319036	T	-0.00077466	0.059479	0.429798	0.7938	0.998085	0.982
E11 Non-insulin-dependent diabetes mellitus	rs6141514	20	33377565	T	-0.0007733	0.059876	0.430113	0.7672	0.998519	0.982
E11 Non-insulin-dependent diabetes mellitus	rs62213657	20	33341129	T	-0.00077212	0.060345	0.429544	0.8235	0.998072	0.982
E11 Non-insulin-dependent diabetes mellitus	rs3787219	20	33355261	T	-0.00077109	0.060667	0.429652	0.8127	0.997977	0.982
E11 Non-insulin-dependent diabetes mellitus	rs4911441	20	33316546	C	-0.0007706	0.060835	0.429619	0.8344	0.998051	0.982
E11 Non-insulin-dependent diabetes mellitus	rs6141509	20	33319388	A	-0.00076856	0.06152	0.429608	0.8398	0.99815	0.982
E11 Non-insulin-dependent diabetes mellitus	rs6060013	20	33308809	G	-0.00076776	0.061799	0.429599	0.8371	0.998031	0.982
E11 Non-insulin-dependent diabetes mellitus	rs17092066	20	33322840	C	-0.00076688	0.062085	0.429715	0.8398	0.997831	0.982
E11 Non-insulin-dependent diabetes mellitus	rs6088734	20	33745046	T	0.00076452	0.062613	0.43727	0.405	0.99818	1.02
E11 Non-insulin-dependent diabetes mellitus	rs1018503	20	33325516	G	-0.00076518	0.062691	0.429769	0.81	0.997936	0.982
E11 Non-insulin-dependent diabetes mellitus	rs6060015	20	33310057	T	-0.00076471	0.062844	0.429577	0.8371	0.998033	0.982
E11 Non-insulin-dependent diabetes mellitus	rs6060012	20	33305220	T	-0.00076424	0.063	0.429646	0.8426	0.997743	0.982
E11 Non-insulin-dependent diabetes mellitus	rs6087618	20	33288407	T	0.00077454	0.063189	0.394868	0.745	0.995799	1.02
E11 Non-insulin-dependent diabetes mellitus	rs6087619	20	33288511	C	0.00077441	0.063236	0.394867	0.745	0.995812	1.02
E11 Non-insulin-dependent diabetes mellitus	rs2378259	20	33341688	A	-0.00076066	0.064223	0.429638	0.829	0.997934	0.982
E11 Non-insulin-dependent diabetes mellitus	rs6087624	20	33336085	G	-0.00075974	0.064555	0.429653	0.8263	0.997891	0.982
E11 Non-insulin-dependent diabetes mellitus	rs633198	20	33778434	C	-0.0007564	0.065484	0.438413	0.6323	0.996697	0.982
E11 Non-insulin-dependent diabetes mellitus	rs6087683	20	33774444	T	0.00075365	0.066156	0.438488	0.6398	0.999375	1.02
E11 Non-insulin-dependent diabetes mellitus	rs4602286	20	33772707	T	0.00075319	0.066241	0.440948	0.6476	0.998455	1.02
E11 Non-insulin-dependent diabetes mellitus	rs2378256	20	33292127	C	0.0007639	0.066912	0.394019	0.8525	0.996241	1.02
E11 Non-insulin-dependent diabetes mellitus	rs13041014	20	32517241	A	0.00074859	0.067975	0.462964	0.5632	0.988902	1.02
E11 Non-insulin-dependent diabetes mellitus	rs2065978	20	33767291	T	0.00074729	0.068519	0.437857	0.5671	0.999578	1.02
E11 Non-insulin-dependent diabetes mellitus	rs6088753	20	33768252	T	0.00074665	0.068695	0.440259	0.5865	0.998529	1.02
E11 Non-insulin-dependent diabetes mellitus	rs4911376	20	32516028	A	0.0007457	0.069265	0.463413	0.5725	0.987225	1.02
E11 Non-insulin-dependent diabetes mellitus	rs945960	20	33762854	G	0.00073992	0.071384	0.437241	0.5484	0.999351	1.02
E11 Non-insulin-dependent diabetes mellitus	rs6060057	20	33392283	G	0.00074158	0.07144	0.428364	0.9222	0.997459	1.02
E11 Non-insulin-dependent diabetes mellitus	rs2425001	20	33394868	T	0.00074121	0.071574	0.428442	0.925	0.997338	1.02
E11 Non-insulin-dependent diabetes mellitus	rs6060285	20	33770487	T	0.00073824	0.071933	0.437959	0.5789	0.999604	1.02
E11 Non-insulin-dependent diabetes mellitus	rs4911472	20	33775377	A	0.00073799	0.072041	0.438002	0.6672	0.99918	1.02
E11 Non-insulin-dependent diabetes mellitus	rs2425000	20	33391141	C	0.00073911	0.072432	0.428354	0.9139	0.996865	1.02
E11 Non-insulin-dependent diabetes mellitus	rs4263187	20	33773283	C	0.00073542	0.072993	0.438061	0.6697	0.999496	1.02
E11 Non-insulin-dependent diabetes mellitus	rs6058202	20	33777983	G	0.00073528	0.07331	0.438005	0.6596	0.997468	1.02
E11 Non-insulin-dependent diabetes mellitus	rs1415774	20	33765616	G	0.00073483	0.073407	0.43764	0.5812	0.998722	1.02
E11 Non-insulin-dependent diabetes mellitus	rs6088744	20	33750142	C	0.00072934	0.073744	0.478193	0.2069	0.997855	1.02
E11 Non-insulin-dependent diabetes mellitus	rs3746428	20	33719183	A	0.00098397	0.073873	0.164082	0.7498	0.993758	1.02
E11 Non-insulin-dependent diabetes mellitus	rs2065979	20	33767690	C	0.00073423	0.073991	0.439418	0.6048	0.995411	1.02
E11 Non-insulin-dependent diabetes mellitus	rs6088758	20	33769203	G	0.00073146	0.074627	0.437411	0.598	0.999468	1.02
E11 Non-insulin-dependent diabetes mellitus	rs1987165	20	33756206	C	0.0007309	0.075344	0.437223	0.4911	0.99604	1.02
E11 Non-insulin-dependent diabetes mellitus	rs1415773	20	33765585	A	0.00072966	0.075454	0.437631	0.5765	0.998739	1.02
E11 Non-insulin-dependent diabetes mellitus	rs6142313	20	33780427	G	-0.00073111	0.075571	0.438257	0.6521	0.992108	0.983
E11 Non-insulin-dependent diabetes mellitus	rs9574	20	33764632	G	0.00072897	0.075628	0.437522	0.5601	0.999493	1.02
E11 Non-insulin-dependent diabetes mellitus	rs3746427	20	33730464	G	0.00072989	0.075681	0.438	0.1458	genotyped	1.02
E11 Non-insulin-dependent diabetes mellitus	rs2273684	20	33529766	G	0.0007327	0.07575	0.445412	0.4154	0.982417	1.02
E11 Non-insulin-dependent diabetes mellitus	rs635279	20	33778882	T	-0.0007288	0.076114	0.437901	0.6697	0.995769	0.983
E11 Non-insulin-dependent diabetes mellitus	rs6088747	20	33754604	T	0.00072931	0.076226	0.439343	0.3814	0.993868	1.02
E11 Non-insulin-dependent diabetes mellitus	rs2069952	20	33763951	T	0.00072592	0.07687	0.437426	0.598	0.99941	1.02
E11 Non-insulin-dependent diabetes mellitus	rs2069944	20	33761498	G	0.00072475	0.077371	0.437222	0.6346	0.999231	1.02
E11 Non-insulin-dependent diabetes mellitus	rs6119510	20	33287782	G	0.00073396	0.077776	0.400814	0.8116	0.994086	1.02
E11 Non-insulin-dependent diabetes mellitus	rs4911476	20	33780768	C	-0.00072554	0.077859	0.438249	0.6298	0.991951	0.983
E11 Non-insulin-dependent diabetes mellitus	rs2069943	20	33761408	C	0.00072223	0.078448	0.437164	0.6297	0.998999	1.02
E11 Non-insulin-dependent diabetes mellitus	rs6059575	20	32523195	C	0.00072066	0.078655	0.460139	0.2189	0.990289	1.02
E11 Non-insulin-dependent diabetes mellitus	rs2069948	20	33762489	T	0.00072058	0.079105	0.437225	0.6297	0.999191	1.02
E11 Non-insulin-dependent diabetes mellitus	rs4911475	20	33780334	A	-0.00072024	0.080029	0.437978	0.6372	0.992619	0.983
E11 Non-insulin-dependent diabetes mellitus	rs4911478	20	33782625	C	-0.00071568	0.082032	0.438373	0.6521	0.991362	0.983
E11 Non-insulin-dependent diabetes mellitus	rs6142322	20	33788538	A	-0.00071165	0.083881	0.438314	0.6422	0.990675	0.983
E11 Non-insulin-dependent diabetes mellitus	rs74786956	20	33786043	C	-0.00071078	0.084185	0.43842	0.6647	0.991114	0.983
E11 Non-insulin-dependent diabetes mellitus	rs34515766	20	33785221	G	-0.00070981	0.084577	0.438373	0.6597	0.991545	0.983
E11 Non-insulin-dependent diabetes mellitus	rs1577924	20	33784288	G	-0.00070879	0.085026	0.43832	0.6571	0.991583	0.983
E11 Non-insulin-dependent diabetes mellitus	rs6142320	20	33788193	G	-0.00070616	0.086268	0.438145	0.6446	0.991461	0.983
E11 Non-insulin-dependent diabetes mellitus	rs2236271	20	33523840	C	0.00071932	0.086426	0.382452	0.8028	0.995051	1.02
E11 Non-insulin-dependent diabetes mellitus	rs6142321	20	33788474	A	-0.00070575	0.086456	0.438102	0.6546	0.991452	0.983
E11 Non-insulin-dependent diabetes mellitus	rs2103971	20	33786256	C	-0.00070449	0.086993	0.438228	0.6521	0.991387	0.983
E11 Non-insulin-dependent diabetes mellitus	rs6087567	20	32825638	T	0.00074772	0.087517	0.3202	0.08403	genotyped	1.02
E11 Non-insulin-dependent diabetes mellitus	rs2093059	20	33791310	C	-0.00070381	0.0879	0.438535	0.6921	0.986803	0.983
E11 Non-insulin-dependent diabetes mellitus	rs4911163	20	33470694	T	0.00072103	0.089143	0.3787	0.07442	genotyped	1.02
E11 Non-insulin-dependent diabetes mellitus	rs6142324	20	33789043	T	-0.0006981	0.089974	0.43793	0.6874	0.990603	0.984
E11 Non-insulin-dependent diabetes mellitus	rs6088461	20	32905161	T	0.00069929	0.090414	0.42632	0.3571	0.992163	1.02
E11 Non-insulin-dependent diabetes mellitus	rs34542479	20	33790120	G	-0.00069532	0.091519	0.438058	0.6873	0.988825	0.984
E11 Non-insulin-dependent diabetes mellitus	rs8114671	20	33789142	A	-0.00069297	0.092346	0.437865	0.6874	0.990913	0.984
E11 Non-insulin-dependent diabetes mellitus	rs2093058	20	33791281	A	-0.00068589	0.09635	0.43793	0.687	0.986964	0.984
E11 Non-insulin-dependent diabetes mellitus	rs35193912	20	33785050	T	-0.00068342	0.097133	0.435823	0.6441	0.990929	0.984
E11 Non-insulin-dependent diabetes mellitus	rs6142327	20	33793147	A	-0.00068501	0.097369	0.438379	0.7823	0.982642	0.984
E11 Non-insulin-dependent diabetes mellitus	rs73105013	20	33144812	C	0.001416	0.098281	0.0629078	0.9515	0.952627	1.03
E11 Non-insulin-dependent diabetes mellitus	rs35381853	20	33790171	C	-0.00068078	0.098535	0.437973	0.6848	0.988635	0.984
E11 Non-insulin-dependent diabetes mellitus	rs6087644	20	33480917	C	0.00069375	0.099579	0.37416	0.8582	0.995165	1.02
E11 Non-insulin-dependent diabetes mellitus	rs6141534	20	33704836	T	-0.00067059	0.10275	0.433197	0.6589	0.997931	0.984
E11 Non-insulin-dependent diabetes mellitus	rs6059743	20	32847711	G	0.00067418	0.10291	0.4169	0.3871	genotyped	1.02
E11 Non-insulin-dependent diabetes mellitus	rs734111	20	33533736	C	0.00068117	0.10498	0.379271	0.7001	0.995412	1.02
E11 Non-insulin-dependent diabetes mellitus	rs7353271	20	33727431	T	0.00088856	0.10725	0.163026	0.9052	0.995144	1.02
E11 Non-insulin-dependent diabetes mellitus	rs12481169	20	33794510	C	-0.00066474	0.10781	0.438594	0.8885	0.981619	0.984
E11 Non-insulin-dependent diabetes mellitus	rs945959	20	33734905	C	0.00065508	0.10813	0.475201	0.1787	0.999205	1.02
E11 Non-insulin-dependent diabetes mellitus	rs6088730	20	33733704	G	0.00065464	0.10835	0.475202	0.1821	0.999341	1.02
E11 Non-insulin-dependent diabetes mellitus	rs6060267	20	33734012	G	0.00065432	0.10853	0.475206	0.1821	0.99931	1.02
E11 Non-insulin-dependent diabetes mellitus	rs3746429	20	33703607	C	-0.00087877	0.11057	0.1632	0.8808	genotyped	0.979
E11 Non-insulin-dependent diabetes mellitus	rs1415771	20	33734493	A	0.00064924	0.11133	0.475146	0.1866	0.999111	1.02
E11 Non-insulin-dependent diabetes mellitus	rs6060268	20	33734293	C	0.00064913	0.11138	0.475147	0.1866	0.999144	1.02
E11 Non-insulin-dependent diabetes mellitus	rs1124511	20	33736697	C	0.0006491	0.11145	0.475183	0.1854	0.998852	1.02
E11 Non-insulin-dependent diabetes mellitus	rs56103637	20	33490921	G	0.00066732	0.11174	0.377665	0.8731	0.999619	1.02
E11 Non-insulin-dependent diabetes mellitus	rs6060112	20	33489276	T	0.00066725	0.11178	0.377645	0.8759	0.999736	1.02
E11 Non-insulin-dependent diabetes mellitus	rs2378292	20	33485178	C	0.00066691	0.11196	0.377669	0.876	0.999596	1.02
E11 Non-insulin-dependent diabetes mellitus	rs8117380	20	33485939	G	0.00066691	0.11196	0.377668	0.876	0.999598	1.02
E11 Non-insulin-dependent diabetes mellitus	rs1801310	20	33517014	G	0.00066676	0.11207	0.377644	0.8702	0.999428	1.02
E11 Non-insulin-dependent diabetes mellitus	rs6142129	20	32819871	G	-0.00069354	0.11243	0.320377	0.8538	0.996431	0.984
E11 Non-insulin-dependent diabetes mellitus	rs4911164	20	33479488	C	0.00066394	0.11357	0.377677	0.8731	0.999544	1.02
E11 Non-insulin-dependent diabetes mellitus	rs6088647	20	33505997	C	0.00066376	0.1137	0.377669	0.8731	0.999393	1.02
E11 Non-insulin-dependent diabetes mellitus	rs2064454	20	33496169	T	0.00066328	0.11395	0.377642	0.8788	0.9996	1.02
E11 Non-insulin-dependent diabetes mellitus	rs6120757	20	33488771	T	0.00066304	0.11402	0.377904	0.8703	0.999452	1.02
E11 Non-insulin-dependent diabetes mellitus	rs2273683	20	33509523	T	0.0006631	0.11406	0.37764	0.8788	0.999598	1.02
E11 Non-insulin-dependent diabetes mellitus	rs2050210	20	32485650	A	0.00075003	0.11409	0.25242	0.1571	0.974843	1.02
E11 Non-insulin-dependent diabetes mellitus	rs2223881	20	33506463	C	0.0006629	0.11416	0.377656	0.8731	0.99947	1.02
E11 Non-insulin-dependent diabetes mellitus	rs4911450	20	33512406	T	0.00066276	0.11423	0.377656	0.8702	0.999464	1.02
E11 Non-insulin-dependent diabetes mellitus	rs8117491	20	33510120	C	0.00066243	0.11442	0.377654	0.8845	0.999423	1.02
E11 Non-insulin-dependent diabetes mellitus	rs6088618	20	33409350	A	0.00064711	0.11465	0.437675	0.2583	0.9982	1.02
E11 Non-insulin-dependent diabetes mellitus	rs4911452	20	33526983	C	0.00066133	0.11482	0.379959	0.6611	0.998898	1.02
E11 Non-insulin-dependent diabetes mellitus	rs6060107	20	33475601	C	0.00065927	0.11613	0.377679	0.8588	0.999706	1.02
E11 Non-insulin-dependent diabetes mellitus	rs8116657	20	33476474	G	0.00065852	0.11655	0.377688	0.856	0.999557	1.02
E11 Non-insulin-dependent diabetes mellitus	rs6058137	20	33475074	A	0.00065813	0.11677	0.377689	0.856	0.999562	1.02
E11 Non-insulin-dependent diabetes mellitus	rs6058135	20	33470164	C	0.00065707	0.11736	0.377691	0.8474	0.999555	1.02
E11 Non-insulin-dependent diabetes mellitus	rs12624640	20	32952125	A	0.00064403	0.1181	0.428495	0.3328	0.996149	1.02
E11 Non-insulin-dependent diabetes mellitus	rs3787215	20	33493877	G	0.00065414	0.11924	0.377224	0.8473	0.998887	1.02
E11 Non-insulin-dependent diabetes mellitus	rs6088635	20	33466501	G	0.00065365	0.11934	0.377623	0.8531	0.999273	1.02
E11 Non-insulin-dependent diabetes mellitus	rs6120746	20	33448496	G	0.00065332	0.12008	0.377403	0.9536	0.996206	1.02
E11 Non-insulin-dependent diabetes mellitus	rs819135	20	32847767	G	-0.00064145	0.12044	0.416849	0.534	0.998932	0.985
E11 Non-insulin-dependent diabetes mellitus	rs2180568	20	33794794	G	-0.00064108	0.12103	0.438102	0.933	0.98127	0.985
E11 Non-insulin-dependent diabetes mellitus	rs6142329	20	33795623	G	-0.00064117	0.12118	0.439235	0.8995	0.979456	0.985
E11 Non-insulin-dependent diabetes mellitus	rs2064453	20	33460810	C	0.00064984	0.12162	0.377838	0.8674	0.998499	1.02
E11 Non-insulin-dependent diabetes mellitus	rs6087654	20	33522142	C	0.00064928	0.12189	0.378549	0.8107	0.998379	1.02
E11 Non-insulin-dependent diabetes mellitus	rs6120758	20	33492523	T	0.00065075	0.1221	0.3788	0.258	genotyped	1.02
E11 Non-insulin-dependent diabetes mellitus	rs6087653	20	33522054	C	0.00064751	0.12288	0.378719	0.7995	0.998433	1.02
E11 Non-insulin-dependent diabetes mellitus	rs6087652	20	33520802	A	0.00064722	0.12305	0.378731	0.8023	0.998415	1.02
E11 Non-insulin-dependent diabetes mellitus	rs7263157	20	33459127	A	0.00064738	0.1231	0.377776	0.8702	0.997973	1.02
E11 Non-insulin-dependent diabetes mellitus	rs6119545	20	33522869	C	0.00064636	0.12355	0.378712	0.8107	0.998439	1.02
E11 Non-insulin-dependent diabetes mellitus	rs6142206	20	33212055	G	-0.00063255	0.12559	0.4219	0.06926	genotyped	0.985
E11 Non-insulin-dependent diabetes mellitus	rs4616	20	33590358	T	-0.00062638	0.12735	0.432631	0.5971	0.99913	0.985
E11 Non-insulin-dependent diabetes mellitus	rs3787214	20	33500245	A	0.00063971	0.12738	0.378738	0.8904	0.998643	1.02
E11 Non-insulin-dependent diabetes mellitus	rs926734	20	33491700	T	0.00063956	0.12749	0.379647	0.974	0.997537	1.02
E11 Non-insulin-dependent diabetes mellitus	rs2378293	20	33499052	G	0.00063929	0.12762	0.378723	0.8904	0.998705	1.02
E11 Non-insulin-dependent diabetes mellitus	rs8183502	20	32805399	A	-0.00067253	0.12794	0.310408	0.3482	0.991902	0.984
E11 Non-insulin-dependent diabetes mellitus	rs6119536	20	33450041	T	0.00063945	0.1282	0.377598	0.9768	0.995407	1.02
E11 Non-insulin-dependent diabetes mellitus	rs6088642	20	33483186	T	0.00063785	0.12833	0.378353	0.8875	0.999858	1.02
E11 Non-insulin-dependent diabetes mellitus	rs6120754	20	33482189	A	0.00063718	0.12873	0.37835	0.8875	0.999868	1.02
E11 Non-insulin-dependent diabetes mellitus	rs6119543	20	33484757	T	0.00063685	0.12889	0.378528	0.8818	0.999917	1.02
E11 Non-insulin-dependent diabetes mellitus	rs13042358	20	33634479	A	-0.00062372	0.12897	0.432578	0.6562	0.999323	0.985
E11 Non-insulin-dependent diabetes mellitus	rs7280	20	33864484	G	0.00062932	0.12901	0.415527	0.7588	0.989393	1.02
E11 Non-insulin-dependent diabetes mellitus	rs2378294	20	33500378	A	0.00063666	0.12917	0.378896	0.8875	0.998681	1.02
E11 Non-insulin-dependent diabetes mellitus	rs725521	20	33516071	C	0.00063614	0.12941	0.378583	0.8703	0.999427	1.02
E11 Non-insulin-dependent diabetes mellitus	rs6088653	20	33520321	C	0.00063598	0.12954	0.378435	0.876	0.999326	1.02
E11 Non-insulin-dependent diabetes mellitus	rs2207147	20	33488013	A	0.0006358	0.12955	0.378496	0.8818	0.99988	1.02
E11 Non-insulin-dependent diabetes mellitus	rs6120756	20	33486596	A	0.00063558	0.12966	0.378515	0.8818	0.999954	1.02
E11 Non-insulin-dependent diabetes mellitus	rs6119542	20	33484545	T	0.00063537	0.12979	0.378517	0.8789	0.999918	1.02
E11 Non-insulin-dependent diabetes mellitus	rs2065003	20	33538521	G	0.00063254	0.12982	0.391959	0.6335	0.995552	1.02
E11 Non-insulin-dependent diabetes mellitus	rs6142290	20	33654672	C	-0.00062201	0.13014	0.432532	0.6165	0.998684	0.985
E11 Non-insulin-dependent diabetes mellitus	rs4911447	20	33479445	A	0.00063458	0.13031	0.378356	0.8903	0.999809	1.02
E11 Non-insulin-dependent diabetes mellitus	rs6087649	20	33510662	G	0.0006347	0.13035	0.378508	0.8789	0.999095	1.02
E11 Non-insulin-dependent diabetes mellitus	rs2145559	20	33651725	A	-0.00062172	0.13035	0.432565	0.6214	0.998419	0.985
E11 Non-insulin-dependent diabetes mellitus	rs8117173	20	32930016	A	0.00081121	0.13036	0.183235	0.1075	0.962009	1.02
E11 Non-insulin-dependent diabetes mellitus	rs4911449	20	33512236	G	0.00063458	0.13037	0.378429	0.8789	0.999406	1.02
E11 Non-insulin-dependent diabetes mellitus	rs6120763	20	33506400	G	0.00063444	0.1305	0.378386	0.8817	0.999248	1.02
E11 Non-insulin-dependent diabetes mellitus	rs6088646	20	33505937	C	0.00063432	0.13054	0.378416	0.876	0.999352	1.02
E11 Non-insulin-dependent diabetes mellitus	rs3746450	20	33508588	T	0.00063378	0.13089	0.378471	0.8789	0.99924	1.02
E11 Non-insulin-dependent diabetes mellitus	rs6058146	20	33540529	G	0.00063078	0.13089	0.391987	0.6361	0.995594	1.02
E11 Non-insulin-dependent diabetes mellitus	rs7266550	20	33495510	T	0.00063286	0.13138	0.378593	0.876	0.999481	1.02
E11 Non-insulin-dependent diabetes mellitus	rs6087651	20	33518353	T	0.00063281	0.13142	0.378609	0.8732	0.999422	1.02
E11 Non-insulin-dependent diabetes mellitus	rs6088650	20	33514465	C	0.00063258	0.13156	0.378586	0.8703	0.999421	1.02
E11 Non-insulin-dependent diabetes mellitus	rs3818273	20	33509275	A	0.000632	0.13191	0.378594	0.8732	0.999479	1.02
E11 Non-insulin-dependent diabetes mellitus	rs4911451	20	33512466	G	0.00063193	0.13195	0.378594	0.8732	0.999458	1.02
E11 Non-insulin-dependent diabetes mellitus	rs1060615	20	33478381	G	0.00063134	0.13229	0.378364	0.8817	0.999774	1.02
E11 Non-insulin-dependent diabetes mellitus	rs1407202	20	33651967	T	-0.00061816	0.13279	0.432062	0.6337	0.997443	0.985
E11 Non-insulin-dependent diabetes mellitus	rs6060197	20	33654315	T	-0.00061718	0.13317	0.432639	0.5875	0.998554	0.985
E11 Non-insulin-dependent diabetes mellitus	rs6088664	20	33551100	A	0.00062561	0.13322	0.395763	0.909	0.996258	1.02
E11 Non-insulin-dependent diabetes mellitus	rs6141526	20	33615255	T	-0.00061625	0.13361	0.432418	0.6764	0.999218	0.985
E11 Non-insulin-dependent diabetes mellitus	rs3761143	20	33545745	T	0.00062388	0.1344	0.395826	0.8247	0.995806	1.01
E11 Non-insulin-dependent diabetes mellitus	rs6060199	20	33654773	G	-0.00061507	0.13447	0.432646	0.5875	0.998731	0.985
E11 Non-insulin-dependent diabetes mellitus	rs2076667	20	33506964	A	0.00062691	0.1351	0.378686	0.8732	0.999127	1.02
E11 Non-insulin-dependent diabetes mellitus	rs6088636	20	33469746	T	0.00062546	0.13593	0.378366	0.8617	0.999805	1.02
E11 Non-insulin-dependent diabetes mellitus	rs1013677	20	33468793	A	0.00062477	0.13636	0.378371	0.8617	0.999802	1.01
E11 Non-insulin-dependent diabetes mellitus	rs6087643	20	33474462	T	0.00062385	0.1369	0.378535	0.8646	0.999856	1.01
E11 Non-insulin-dependent diabetes mellitus	rs6088640	20	33472509	T	0.00062373	0.13697	0.378538	0.8646	0.999904	1.01
E11 Non-insulin-dependent diabetes mellitus	rs6087642	20	33468306	C	0.00062306	0.13748	0.378317	0.8703	0.99963	1.01
E11 Non-insulin-dependent diabetes mellitus	rs3746432	20	33592763	T	-0.00060943	0.13801	0.434287	0.5852	0.998267	0.986
E11 Non-insulin-dependent diabetes mellitus	rs1984588	20	33435874	C	0.00062335	0.13815	0.377392	0.9797	0.995584	1.01
E11 Non-insulin-dependent diabetes mellitus	rs2038503	20	33675900	A	-0.00060828	0.1389	0.433013	0.7305	0.997893	0.986
E11 Non-insulin-dependent diabetes mellitus	rs6087641	20	33467717	C	0.00062042	0.13913	0.378483	0.8674	0.999665	1.01
E11 Non-insulin-dependent diabetes mellitus	rs6120854	20	33757180	T	0.00073599	0.13988	0.212334	0.6304	0.995099	1.02
E11 Non-insulin-dependent diabetes mellitus	rs6060266	20	33733078	C	0.00073717	0.14057	0.209335	0.7259	0.99796	1.02
E11 Non-insulin-dependent diabetes mellitus	rs6142284	20	33641367	A	-0.0006041	0.14142	0.432769	0.6765	0.999353	0.986
E11 Non-insulin-dependent diabetes mellitus	rs3803936	20	33632775	C	-0.00060384	0.14152	0.432924	0.6314	0.999619	0.986
E11 Non-insulin-dependent diabetes mellitus	rs2104084	20	33649217	C	-0.00060318	0.1421	0.432827	0.6613	0.998905	0.986
E11 Non-insulin-dependent diabetes mellitus	rs6088655	20	33527838	G	0.00061216	0.14457	0.3801	0.4445	genotyped	1.01
E11 Non-insulin-dependent diabetes mellitus	rs2104083	20	33649133	A	-0.00059926	0.14469	0.432723	0.674	0.999037	0.986
E11 Non-insulin-dependent diabetes mellitus	rs6142280	20	33622242	C	-0.00059764	0.14573	0.432846	0.6215	0.999194	0.986
E11 Non-insulin-dependent diabetes mellitus	rs6141523	20	33569417	A	-0.00059807	0.14577	0.429628	0.6332	0.999501	0.986
E11 Non-insulin-dependent diabetes mellitus	rs6120778	20	33565169	C	0.00059815	0.14632	0.4297	0.1762	genotyped	1.01
E11 Non-insulin-dependent diabetes mellitus	rs2057324	20	33656561	A	-0.00059527	0.14745	0.432811	0.6117	0.998709	0.986
E11 Non-insulin-dependent diabetes mellitus	rs6088738	20	33747331	A	0.00071979	0.14763	0.21272	0.8785	0.999665	1.02
E11 Non-insulin-dependent diabetes mellitus	rs6142294	20	33671497	G	-0.00059515	0.14795	0.431917	0.7383	0.996808	0.986
E11 Non-insulin-dependent diabetes mellitus	rs745849	20	33572178	A	-0.00059388	0.14868	0.429581	0.6086	0.999208	0.986
E11 Non-insulin-dependent diabetes mellitus	rs6120663	20	33081906	A	0.00059267	0.14875	0.439027	0.3116	0.997583	1.01
E11 Non-insulin-dependent diabetes mellitus	rs17404569	20	33674077	C	-0.00059326	0.14882	0.43319	0.6289	0.99846	0.986
E11 Non-insulin-dependent diabetes mellitus	rs734308	20	33572096	G	-0.00059359	0.14889	0.429576	0.5989	0.999015	0.986
E11 Non-insulin-dependent diabetes mellitus	rs11696548	20	33859675	T	0.00082271	0.14996	0.152622	0.6823	0.97898	1.02
E11 Non-insulin-dependent diabetes mellitus	rs4911461	20	33629993	C	-0.00059118	0.1501	0.432919	0.674	0.999363	0.986
E11 Non-insulin-dependent diabetes mellitus	rs6141530	20	33663147	C	-0.00059155	0.15039	0.43183	0.5543	0.9974	0.986
E11 Non-insulin-dependent diabetes mellitus	rs6060140	20	33566507	A	0.00059213	0.15046	0.428847	0.6989	0.99661	1.01
E11 Non-insulin-dependent diabetes mellitus	rs6060168	20	33621017	C	-0.00058945	0.15133	0.433066	0.624	0.999226	0.986
E11 Non-insulin-dependent diabetes mellitus	rs2038504	20	33648187	C	-0.00058923	0.15153	0.43285	0.6689	0.999049	0.986
E11 Non-insulin-dependent diabetes mellitus	rs2425012	20	33581955	A	-0.00058852	0.15195	0.433035	0.6842	0.99919	0.986
E11 Non-insulin-dependent diabetes mellitus	rs6088737	20	33745938	G	0.00071184	0.15213	0.212687	0.8906	0.999912	1.02
E11 Non-insulin-dependent diabetes mellitus	rs6060130	20	33549319	T	0.00059561	0.1535	0.392758	0.6989	0.996082	1.01
E11 Non-insulin-dependent diabetes mellitus	rs34337249	20	33642042	A	-0.0010009	0.15414	0.0946826	0.8104	0.976366	0.976
E11 Non-insulin-dependent diabetes mellitus	rs34837802	20	33424908	G	0.00059604	0.15487	0.384662	0.7587	0.995205	1.01
E11 Non-insulin-dependent diabetes mellitus	rs2425006	20	33571228	G	-0.00058486	0.15497	0.429889	0.6357	0.999038	0.986
E11 Non-insulin-dependent diabetes mellitus	rs6142276	20	33620332	C	-0.0005838	0.1552	0.433092	0.6413	0.999592	0.986
E11 Non-insulin-dependent diabetes mellitus	rs1544047	20	33670753	C	-0.00058374	0.15557	0.432857	0.5828	0.998139	0.986
E11 Non-insulin-dependent diabetes mellitus	rs8122889	20	33424151	G	0.00059368	0.15646	0.384905	0.7753	0.995263	1.01
E11 Non-insulin-dependent diabetes mellitus	rs1885114	20	33577361	G	-0.00058175	0.15717	0.434212	0.757	0.996112	0.986
E11 Non-insulin-dependent diabetes mellitus	rs13040631	20	33747714	C	0.00070271	0.15752	0.212683	0.8946	0.999607	1.02
E11 Non-insulin-dependent diabetes mellitus	rs66535333	20	33656666	A	-0.00058041	0.15782	0.432931	0.6142	0.998694	0.986
E11 Non-insulin-dependent diabetes mellitus	rs2378262	20	33550774	G	0.00058864	0.15835	0.392536	0.7363	0.996453	1.01
E11 Non-insulin-dependent diabetes mellitus	rs6088666	20	33564570	G	0.0005799	0.1584	0.429787	0.6407	0.999611	1.01
E11 Non-insulin-dependent diabetes mellitus	rs6088739	20	33748724	A	0.00070123	0.15843	0.212671	0.8624	0.99942	1.02
E11 Non-insulin-dependent diabetes mellitus	rs6058154	20	33585834	A	-0.00057912	0.15853	0.433059	0.6314	0.999687	0.986
E11 Non-insulin-dependent diabetes mellitus	rs6058161	20	33620026	T	-0.00057871	0.15887	0.432939	0.6488	0.999471	0.986
E11 Non-insulin-dependent diabetes mellitus	rs6060165	20	33619480	C	-0.00057843	0.15904	0.433159	0.6339	0.999453	0.986
E11 Non-insulin-dependent diabetes mellitus	rs6060003	20	33294945	T	-0.000577	0.15905	0.4473	0.8331	genotyped	0.986
E11 Non-insulin-dependent diabetes mellitus	rs2425026	20	33847253	T	0.00058061	0.15985	0.427994	0.4107	0.989803	1.01
E11 Non-insulin-dependent diabetes mellitus	rs6142285	20	33643640	G	-0.00059362	0.15994	0.381515	0.3016	0.982933	0.986
E11 Non-insulin-dependent diabetes mellitus	rs6060273	20	33744323	C	0.00069768	0.16053	0.212569	0.9959	0.999769	1.02
E11 Non-insulin-dependent diabetes mellitus	rs6088743	20	33749657	G	0.00069692	0.16105	0.212756	0.8624	0.998953	1.02
E11 Non-insulin-dependent diabetes mellitus	rs6088623	20	33429684	C	0.00058669	0.16139	0.384805	0.7644	0.995296	1.01
E11 Non-insulin-dependent diabetes mellitus	rs6060139	20	33566499	C	0.0005745	0.16297	0.429033	0.717	0.996831	1.01
E11 Non-insulin-dependent diabetes mellitus	rs13044413	20	33020957	G	0.00057292	0.16299	0.439666	0.2543	0.99617	1.01
E11 Non-insulin-dependent diabetes mellitus	rs6060302	20	33783493	A	0.00082626	0.16301	0.138232	0.9657	0.988256	1.02
E11 Non-insulin-dependent diabetes mellitus	rs35556948	20	33881187	C	0.0010709	0.16372	0.0782431	0.2492	0.966668	1.03
E11 Non-insulin-dependent diabetes mellitus	rs3761144	20	33544075	G	0.00058013	0.16472	0.39263	0.6962	0.995109	1.01
E11 Non-insulin-dependent diabetes mellitus	rs6088735	20	33745676	C	-0.00069226	0.16551	0.2117	0.1917	genotyped	0.984
E11 Non-insulin-dependent diabetes mellitus	rs3736802	20	33604042	C	-0.00056456	0.16555	0.484136	0.4689	0.999592	0.987
E11 Non-insulin-dependent diabetes mellitus	rs6141479	20	33121942	C	0.00072564	0.16875	0.18716	0.09311	0.979092	1.02
E11 Non-insulin-dependent diabetes mellitus	rs6060283	20	33767865	G	0.00071885	0.16919	0.186432	0.9284	0.997737	1.02
E11 Non-insulin-dependent diabetes mellitus	rs6058194	20	33739831	A	0.00068463	0.17036	0.210019	0.7971	0.999198	1.02
E11 Non-insulin-dependent diabetes mellitus	rs6058195	20	33740005	C	0.00068418	0.17063	0.210024	0.7971	0.999232	1.02
E11 Non-insulin-dependent diabetes mellitus	rs6058193	20	33734464	G	0.00068264	0.1714	0.210219	0.6735	0.999328	1.02
E11 Non-insulin-dependent diabetes mellitus	rs6060270	20	33736814	T	0.00068257	0.17144	0.210256	0.7152	0.999215	1.02
E11 Non-insulin-dependent diabetes mellitus	rs6060278	20	33753262	T	-0.00067965	0.17215	0.2131	0.2559	genotyped	0.984
E11 Non-insulin-dependent diabetes mellitus	rs35591645	20	33682942	T	0.0014239	0.17303	0.0411189	0.2031	0.957763	1.03
E11 Non-insulin-dependent diabetes mellitus	rs6060276	20	33750479	C	0.00067615	0.1739	0.212661	0.8946	0.999268	1.02
E11 Non-insulin-dependent diabetes mellitus	rs6088732	20	33744134	T	0.00067699	0.17515	0.209999	0.817	0.999577	1.02
E11 Non-insulin-dependent diabetes mellitus	rs6060288	20	33772243	A	0.00060899	0.18188	0.274171	0.6808	0.998459	1.01
E11 Non-insulin-dependent diabetes mellitus	rs11696967	20	33743609	C	0.00066321	0.18413	0.209962	0.7931	0.999528	1.02
E11 Non-insulin-dependent diabetes mellitus	rs6087634	20	33413809	A	0.00055591	0.18532	0.379352	0.7775	0.997527	1.01
E11 Non-insulin-dependent diabetes mellitus	rs2889861	20	33405664	T	0.00055531	0.18585	0.3794	0.7333	genotyped	1.01
E11 Non-insulin-dependent diabetes mellitus	rs10747514	20	33775369	A	0.00060347	0.18595	0.274263	0.7286	0.997911	1.01
E11 Non-insulin-dependent diabetes mellitus	rs4911161	20	33402231	T	0.00055404	0.18638	0.379275	0.7719	0.999731	1.01
E11 Non-insulin-dependent diabetes mellitus	rs6087633	20	33408137	G	0.00055354	0.18701	0.379196	0.7858	0.998511	1.01
E11 Non-insulin-dependent diabetes mellitus	rs6087681	20	33752896	C	0.00065788	0.18944	0.210294	0.7545	0.99155	1.02
E11 Non-insulin-dependent diabetes mellitus	rs6087682	20	33752897	T	0.00065753	0.1897	0.210285	0.7545	0.991499	1.02
E11 Non-insulin-dependent diabetes mellitus	rs6120739	20	33405227	G	0.00054948	0.18999	0.379304	0.7747	0.999905	1.01
E11 Non-insulin-dependent diabetes mellitus	rs2425005	20	33407715	C	0.0005494	0.19037	0.379005	0.7774	0.998221	1.01
E11 Non-insulin-dependent diabetes mellitus	rs7262274	20	33413176	C	0.00054946	0.19048	0.379091	0.7914	0.997627	1.01
E11 Non-insulin-dependent diabetes mellitus	rs2253484	20	33405263	T	0.00054858	0.1907	0.379369	0.7747	0.999515	1.01
E11 Non-insulin-dependent diabetes mellitus	rs6060064	20	33406339	G	0.00054854	0.19084	0.379188	0.783	0.999555	1.01
E11 Non-insulin-dependent diabetes mellitus	rs1018447	20	33401707	A	0.00054547	0.19327	0.379277	0.7831	0.999759	1.01
E11 Non-insulin-dependent diabetes mellitus	rs6087685	20	33777612	C	0.00059295	0.19378	0.274401	0.7643	0.997306	1.01
E11 Non-insulin-dependent diabetes mellitus	rs4911162	20	33411425	C	0.00054513	0.19396	0.379159	0.8619	0.997815	1.01
E11 Non-insulin-dependent diabetes mellitus	rs11700255	20	32682325	T	0.00054949	0.19665	0.359478	0.8414	0.992588	1.01
E11 Non-insulin-dependent diabetes mellitus	rs959829	20	33346047	C	-0.00054129	0.19709	0.378983	0.7606	0.997926	0.987
E11 Non-insulin-dependent diabetes mellitus	rs6058120	20	33402829	G	0.00054033	0.19758	0.379146	0.842	0.999382	1.01
E11 Non-insulin-dependent diabetes mellitus	rs13044899	20	33287078	A	0.0005309	0.19793	0.436485	0.7021	0.988654	1.01
E11 Non-insulin-dependent diabetes mellitus	rs6141513	20	33374402	C	-0.00053983	0.1982	0.379133	0.7773	0.998337	0.987
E11 Non-insulin-dependent diabetes mellitus	rs2425020	20	33823832	C	0.0006143	0.19842	0.256598	0.5811	0.947959	1.01
E11 Non-insulin-dependent diabetes mellitus	rs35595751	20	32721584	T	0.00054096	0.20347	0.359574	0.827	0.993549	1.01
E11 Non-insulin-dependent diabetes mellitus	rs8501	20	33590584	C	0.00067206	0.20525	0.178924	0.5681	0.999363	1.02
E11 Non-insulin-dependent diabetes mellitus	rs6088733	20	33744904	A	-0.00063794	0.20603	0.2121	7.715e-08	genotyped	0.985
E11 Non-insulin-dependent diabetes mellitus	rs73610830	20	32863523	G	-0.00055286	0.20782	0.320551	0.4441	0.987163	0.987
E11 Non-insulin-dependent diabetes mellitus	rs2295352	20	33320055	G	-0.00052842	0.20796	0.378589	0.7141	0.998281	0.987
E11 Non-insulin-dependent diabetes mellitus	rs6060001	20	33294353	G	0.00051406	0.20931	0.445114	0.4011	0.998579	1.01
E11 Non-insulin-dependent diabetes mellitus	rs12626023	20	33416536	T	0.00052576	0.21001	0.381318	0.6378	0.996578	1.01
E11 Non-insulin-dependent diabetes mellitus	rs6120813	20	33642112	C	0.00066004	0.21336	0.179009	0.5723	0.999563	1.02
E11 Non-insulin-dependent diabetes mellitus	rs6060300	20	33780970	C	0.00065519	0.21365	0.184454	0.9548	0.98993	1.02
E11 Non-insulin-dependent diabetes mellitus	rs2024635	20	33422614	A	0.00052137	0.21412	0.38114	0.6954	0.995466	1.01
E11 Non-insulin-dependent diabetes mellitus	rs6120825	20	33671141	C	0.00065374	0.2158	0.185746	0.5469	0.979315	1.02
E11 Non-insulin-dependent diabetes mellitus	rs112928119	20	33726451	T	0.00061718	0.21589	0.211859	0.5869	0.994785	1.01
E11 Non-insulin-dependent diabetes mellitus	rs6060068	20	33415820	A	0.00051772	0.21709	0.381111	0.6327	0.996838	1.01
E11 Non-insulin-dependent diabetes mellitus	rs13043392	20	32606735	A	-0.00052262	0.21716	0.3634	0.9442	genotyped	0.988
E11 Non-insulin-dependent diabetes mellitus	rs13433216	20	33616301	C	0.00065331	0.21804	0.179094	0.5644	0.999334	1.02
E11 Non-insulin-dependent diabetes mellitus	rs6088621	20	33418740	T	0.00051459	0.21994	0.381314	0.661	0.995996	1.01
E11 Non-insulin-dependent diabetes mellitus	rs3746438	20	33584289	C	0.00050174	0.22218	0.4404	0.02813	genotyped	1.01
E11 Non-insulin-dependent diabetes mellitus	rs6120788	20	33583716	T	0.0006468	0.22332	0.178523	0.6239	0.998896	1.02
E11 Non-insulin-dependent diabetes mellitus	rs977936	20	33790993	T	0.00063958	0.22416	0.186185	0.9191	0.985036	1.02
E11 Non-insulin-dependent diabetes mellitus	rs6088742	20	33748835	A	0.0006177	0.22424	0.202013	0.9367	0.993285	1.01
E11 Non-insulin-dependent diabetes mellitus	rs6088740	20	33748769	C	0.0006177	0.22436	0.202047	0.9325	0.99267	1.01
E11 Non-insulin-dependent diabetes mellitus	rs6120848	20	33728678	C	0.00060491	0.22472	0.211866	0.7132	0.996959	1.01
E11 Non-insulin-dependent diabetes mellitus	rs3746436	20	33586193	C	-0.00064515	0.2249	0.1785	0.5833	genotyped	0.985
E11 Non-insulin-dependent diabetes mellitus	rs3746435	20	33587198	G	-0.00064375	0.22583	0.1787	0.8473	genotyped	0.985
E11 Non-insulin-dependent diabetes mellitus	rs3746448	20	33572979	T	0.0006643	0.22655	0.164223	0.7044	0.997878	1.02
E11 Non-insulin-dependent diabetes mellitus	rs6088741	20	33748779	A	0.00061475	0.22657	0.202075	0.924	0.992637	1.01
E11 Non-insulin-dependent diabetes mellitus	rs6087659	20	33606383	A	0.00064116	0.22725	0.179562	0.576	0.995182	1.02
E11 Non-insulin-dependent diabetes mellitus	rs6119529	20	33401059	G	0.00050571	0.22851	0.37734	0.6737	0.998475	1.01
E11 Non-insulin-dependent diabetes mellitus	rs6059976	20	33261649	A	0.00049771	0.2286	0.45441	0.9087	0.975502	1.01
E11 Non-insulin-dependent diabetes mellitus	rs1885117	20	33600740	T	0.00063861	0.22861	0.178949	0.5448	0.999776	1.02
E11 Non-insulin-dependent diabetes mellitus	rs1885116	20	33600560	G	0.00063803	0.22904	0.178955	0.5448	0.999761	1.02
E11 Non-insulin-dependent diabetes mellitus	rs6120793	20	33604407	C	0.00063776	0.22923	0.178946	0.5448	0.999818	1.02
E11 Non-insulin-dependent diabetes mellitus	rs6088622	20	33419977	A	0.00050358	0.23014	0.380911	0.6953	0.996039	1.01
E11 Non-insulin-dependent diabetes mellitus	rs6088694	20	33652371	A	0.00063601	0.23078	0.178919	0.5407	0.998504	1.02
E11 Non-insulin-dependent diabetes mellitus	rs6088700	20	33660752	C	0.00063577	0.23096	0.178875	0.533	0.998676	1.02
E11 Non-insulin-dependent diabetes mellitus	rs6120821	20	33660761	C	0.00063556	0.23111	0.178878	0.533	0.998657	1.02
E11 Non-insulin-dependent diabetes mellitus	rs1205347	20	32912050	T	-0.00048793	0.23142	0.492749	0.7021	0.996221	0.988
E11 Non-insulin-dependent diabetes mellitus	rs752075	20	33591591	A	0.00063609	0.23176	0.178132	0.67	0.997795	1.02
E11 Non-insulin-dependent diabetes mellitus	rs6087667	20	33651887	G	0.00063446	0.2319	0.178897	0.5446	0.998689	1.02
E11 Non-insulin-dependent diabetes mellitus	rs1205336	20	32926336	A	-0.00048812	0.23193	0.496187	0.7118	0.993287	0.988
E11 Non-insulin-dependent diabetes mellitus	rs36003887	20	33589107	A	0.0006309	0.23459	0.178727	0.6039	0.999457	1.02
E11 Non-insulin-dependent diabetes mellitus	rs6119560	20	33606977	C	0.00063035	0.23466	0.178984	0.5643	0.999737	1.02
E11 Non-insulin-dependent diabetes mellitus	rs752448	20	33592248	T	0.00063014	0.23538	0.178543	0.5718	0.999206	1.02
E11 Non-insulin-dependent diabetes mellitus	rs1205346	20	32914269	T	-0.00048312	0.23591	0.49003	0.9021	0.996425	0.989
E11 Non-insulin-dependent diabetes mellitus	rs3746446	20	33574765	C	0.00062822	0.23651	0.178883	0.5721	0.999002	1.02
E11 Non-insulin-dependent diabetes mellitus	rs113299530	20	33236517	A	0.0015425	0.23746	0.0256533	0.2218	0.969501	1.04
E11 Non-insulin-dependent diabetes mellitus	rs6120819	20	33653038	C	0.00062585	0.23807	0.179304	0.4704	0.997708	1.02
E11 Non-insulin-dependent diabetes mellitus	rs6088703	20	33676049	A	0.00062599	0.23839	0.179014	0.5327	0.997145	1.02
E11 Non-insulin-dependent diabetes mellitus	rs3818253	20	33596876	A	0.00062449	0.23922	0.178824	0.5292	0.999513	1.01
E11 Non-insulin-dependent diabetes mellitus	rs6088667	20	33566722	G	0.00062453	0.23923	0.178806	0.5563	0.999599	1.01
E11 Non-insulin-dependent diabetes mellitus	rs1205340	20	32923871	A	-0.0004805	0.23945	0.496008	0.7118	0.992426	0.989
E11 Non-insulin-dependent diabetes mellitus	rs6088682	20	33615702	C	0.0006222	0.24077	0.179037	0.5565	0.999431	1.01
E11 Non-insulin-dependent diabetes mellitus	rs2013125	20	33601154	A	0.00062173	0.24137	0.178689	0.5214	0.99984	1.01
E11 Non-insulin-dependent diabetes mellitus	rs6059909	20	33139691	A	0.00047762	0.24299	0.486502	0.6002	0.990408	1.01
E11 Non-insulin-dependent diabetes mellitus	rs6088764	20	33793159	A	0.00053526	0.24342	0.274892	0.6245	0.983483	1.01
E11 Non-insulin-dependent diabetes mellitus	rs3746444	20	33578251	G	0.00061892	0.24353	0.178803	0.5563	0.999171	1.01
E11 Non-insulin-dependent diabetes mellitus	rs7261969	20	33563611	T	0.00061867	0.24369	0.178855	0.5841	0.999356	1.01
E11 Non-insulin-dependent diabetes mellitus	rs6120812	20	33629427	C	0.00061821	0.24375	0.179082	0.5763	0.999459	1.01
E11 Non-insulin-dependent diabetes mellitus	rs7268266	20	33581889	C	0.0006162	0.24559	0.178933	0.5721	0.998823	1.01
E11 Non-insulin-dependent diabetes mellitus	rs6120797	20	33606002	A	0.00061544	0.24615	0.178698	0.5444	0.999883	1.01
E11 Non-insulin-dependent diabetes mellitus	rs6120804	20	33623701	A	0.00061442	0.2471	0.17985	0.503	0.994355	1.01
E11 Non-insulin-dependent diabetes mellitus	rs17319032	20	33643296	C	0.00061386	0.24738	0.178731	0.5444	0.999698	1.01
E11 Non-insulin-dependent diabetes mellitus	rs11167253	20	33614449	C	0.00061133	0.24935	0.178738	0.5483	0.999658	1.01
E11 Non-insulin-dependent diabetes mellitus	rs1205337	20	32926041	A	-0.00046914	0.24952	0.490297	0.8886	0.99765	0.989
E11 Non-insulin-dependent diabetes mellitus	rs6120826	20	33671831	A	0.00061104	0.24977	0.178894	0.5405	0.99783	1.01
E11 Non-insulin-dependent diabetes mellitus	rs1205345	20	32914699	C	-0.00046832	0.25059	0.48927	0.9157	0.996435	0.989
E11 Non-insulin-dependent diabetes mellitus	rs6088686	20	33623437	T	0.0006083	0.25164	0.178793	0.564	0.999519	1.01
E11 Non-insulin-dependent diabetes mellitus	rs6088678	20	33607551	T	0.00060655	0.253	0.178789	0.5719	0.999748	1.01
E11 Non-insulin-dependent diabetes mellitus	rs6120790	20	33599090	T	0.00060628	0.25315	0.178833	0.5446	0.999794	1.01
E11 Non-insulin-dependent diabetes mellitus	rs6088691	20	33633758	T	0.00060584	0.25355	0.178799	0.5601	0.99956	1.01
E11 Non-insulin-dependent diabetes mellitus	rs1205338	20	32925625	G	-0.00046414	0.25459	0.49028	0.9022	0.997603	0.989
E11 Non-insulin-dependent diabetes mellitus	rs6120799	20	33614955	C	0.00060314	0.25564	0.17889	0.5641	0.999456	1.01
E11 Non-insulin-dependent diabetes mellitus	rs6058064	20	33086622	G	0.0004628	0.25617	0.49279	0.7301	0.997714	1.01
E11 Non-insulin-dependent diabetes mellitus	rs1205344	20	32918298	A	-0.00046171	0.25753	0.491698	0.7847	0.995864	0.989
E11 Non-insulin-dependent diabetes mellitus	rs6120803	20	33620086	A	0.00060024	0.25788	0.178907	0.5921	0.9996	1.01
E11 Non-insulin-dependent diabetes mellitus	rs6120675	20	33138870	C	0.00046154	0.25823	0.486867	0.6965	0.993998	1.01
E11 Non-insulin-dependent diabetes mellitus	rs2424999	20	33386430	A	0.00047441	0.25979	0.377224	0.6999	0.993514	1.01
E11 Non-insulin-dependent diabetes mellitus	rs6088690	20	33633326	G	0.00059544	0.26169	0.178953	0.5841	0.999442	1.01
E11 Non-insulin-dependent diabetes mellitus	rs6120828	20	33674460	C	0.00059563	0.26182	0.178832	0.5406	0.998521	1.01
E11 Non-insulin-dependent diabetes mellitus	rs1205342	20	32921842	T	-0.0004568	0.26232	0.490058	0.8886	0.996977	0.989
E11 Non-insulin-dependent diabetes mellitus	rs1205341	20	32923476	C	-0.00045603	0.26308	0.489973	0.9238	0.997114	0.989
E11 Non-insulin-dependent diabetes mellitus	rs4258875	20	32924895	A	-0.00045519	0.26389	0.490313	0.9103	0.997439	0.989
E11 Non-insulin-dependent diabetes mellitus	rs6120849	20	33730387	C	-0.00055583	0.26455	0.2118	0.767	genotyped	0.987
E11 Non-insulin-dependent diabetes mellitus	rs13043666	20	32570632	C	0.00059824	0.26603	0.17487	0.4847	0.992445	1.01
E11 Non-insulin-dependent diabetes mellitus	rs6088638	20	33470514	C	0.00059841	0.26706	0.17391	0.0972	0.992771	1.01
E11 Non-insulin-dependent diabetes mellitus	rs2425019	20	33819415	G	0.0004572	0.2672	0.430419	0.441	0.99324	1.01
E11 Non-insulin-dependent diabetes mellitus	rs1205334	20	32930369	C	-0.00045079	0.26845	0.490224	0.9456	0.997995	0.989
E11 Non-insulin-dependent diabetes mellitus	rs7271970	20	32987666	G	-0.00044777	0.27173	0.49449	0.7638	0.998345	0.989
E11 Non-insulin-dependent diabetes mellitus	rs6059913	20	33143288	A	0.00044825	0.27235	0.485679	0.6195	0.99385	1.01
E11 Non-insulin-dependent diabetes mellitus	rs11167239	20	33140472	A	0.00044778	0.27295	0.48571	0.6292	0.993389	1.01
E11 Non-insulin-dependent diabetes mellitus	rs2025096	20	33540000	A	0.00057119	0.27394	0.187167	0.2748	0.996067	1.01
E11 Non-insulin-dependent diabetes mellitus	rs11167248	20	33538721	T	0.00057095	0.27418	0.18717	0.2602	0.995908	1.01
E11 Non-insulin-dependent diabetes mellitus	rs1205343	20	32921602	G	-0.00044336	0.27667	0.48957	0.8698	0.996909	0.989
E11 Non-insulin-dependent diabetes mellitus	rs6059918	20	33150503	T	0.00044339	0.27715	0.48687	0.7374	0.995191	1.01
E11 Non-insulin-dependent diabetes mellitus	rs2378133	20	32919505	G	-0.00044221	0.27796	0.489519	0.8698	0.996576	0.99
E11 Non-insulin-dependent diabetes mellitus	rs2378134	20	32938085	T	-0.00044159	0.27818	0.490687	0.8779	0.998767	0.99
E11 Non-insulin-dependent diabetes mellitus	rs6058041	20	33018008	G	0.00044109	0.27868	0.49378	0.6821	0.999731	1.01
E11 Non-insulin-dependent diabetes mellitus	rs4911151	20	32932273	C	-0.00044103	0.27874	0.490651	0.8941	0.999	0.99
E11 Non-insulin-dependent diabetes mellitus	rs12480410	20	32988678	T	-0.00044101	0.27905	0.494503	0.7482	0.998296	0.99
E11 Non-insulin-dependent diabetes mellitus	rs6059824	20	33014543	C	0.0004407	0.2791	0.493768	0.6871	0.999819	1.01
E11 Non-insulin-dependent diabetes mellitus	rs1890002	20	32919219	G	-0.00044062	0.27969	0.489472	0.9021	0.996555	0.99
E11 Non-insulin-dependent diabetes mellitus	rs6088475	20	32964987	C	-0.00043992	0.27996	0.49372	0.7328	0.99948	0.99
E11 Non-insulin-dependent diabetes mellitus	rs4142007	20	32990050	T	-0.00044004	0.28017	0.494425	0.7586	0.997736	0.99
E11 Non-insulin-dependent diabetes mellitus	rs62212172	20	32987705	A	-0.00043975	0.2804	0.494521	0.7431	0.998165	0.99
E11 Non-insulin-dependent diabetes mellitus	rs6142153	20	32968747	G	-0.00043928	0.28063	0.493745	0.7277	0.999515	0.99
E11 Non-insulin-dependent diabetes mellitus	rs6088471	20	32932643	A	-0.00043916	0.28081	0.49069	0.8914	0.99896	0.99
E11 Non-insulin-dependent diabetes mellitus	rs7271144	20	32948885	C	-0.00043906	0.28094	0.492616	0.6997	0.998958	0.99
E11 Non-insulin-dependent diabetes mellitus	rs6141465	20	32967314	C	-0.00043802	0.28201	0.49372	0.7354	0.999315	0.99
E11 Non-insulin-dependent diabetes mellitus	rs6087588	20	33066369	C	0.00043798	0.28205	0.493689	0.7277	0.99963	1.01
E11 Non-insulin-dependent diabetes mellitus	rs6059875	20	33086090	G	0.00043783	0.2822	0.493655	0.7509	0.999403	1.01
E11 Non-insulin-dependent diabetes mellitus	rs6059867	20	33078103	T	0.00043738	0.2827	0.493659	0.7561	0.999361	1.01
E11 Non-insulin-dependent diabetes mellitus	rs6058052	20	33047084	G	0.00043718	0.28298	0.493709	0.6871	0.999641	1.01
E11 Non-insulin-dependent diabetes mellitus	rs6058070	20	33103521	C	0.00043627	0.28392	0.493639	0.79	0.999366	1.01
E11 Non-insulin-dependent diabetes mellitus	rs6142159	20	32993035	A	-0.00043627	0.28403	0.493615	0.7431	0.998837	0.99
E11 Non-insulin-dependent diabetes mellitus	rs6088502	20	33037644	T	0.00043597	0.28426	0.493646	0.6972	0.999666	1.01
E11 Non-insulin-dependent diabetes mellitus	rs6059856	20	33057954	C	0.0004357	0.28457	0.49367	0.6921	0.999587	1.01
E11 Non-insulin-dependent diabetes mellitus	rs1569780	20	33429907	C	0.00044852	0.28506	0.395281	0.9139	0.983867	1.01
E11 Non-insulin-dependent diabetes mellitus	rs6142157	20	32984172	G	-0.00043374	0.28674	0.493755	0.7406	0.99933	0.99
E11 Non-insulin-dependent diabetes mellitus	rs6059896	20	33111783	C	0.00043228	0.28848	0.493567	0.7717	0.998892	1.01
E11 Non-insulin-dependent diabetes mellitus	rs6087666	20	33640242	G	-0.00056396	0.28877	0.1787	0.5287	genotyped	0.987
E11 Non-insulin-dependent diabetes mellitus	rs6088512	20	33095891	A	0.00043195	0.2888	0.493526	0.7795	0.999046	1.01
E11 Non-insulin-dependent diabetes mellitus	rs6059880	20	33088669	A	0.00043196	0.28895	0.492412	0.8778	0.99775	1.01
E11 Non-insulin-dependent diabetes mellitus	rs73105035	20	33171411	T	0.0013587	0.28944	0.0261298	0.2339	0.987143	1.03
E11 Non-insulin-dependent diabetes mellitus	rs13043505	20	32946905	T	-0.00042911	0.29275	0.491378	0.9864	0.995649	0.99
E11 Non-insulin-dependent diabetes mellitus	rs4911153	20	32961547	T	-0.00042699	0.29431	0.493551	0.7639	0.99954	0.99
E11 Non-insulin-dependent diabetes mellitus	rs6059905	20	33126946	C	0.00042741	0.29464	0.490892	0.9536	0.995855	1.01
E11 Non-insulin-dependent diabetes mellitus	rs11700221	20	32940320	C	-0.00042668	0.29472	0.490147	0.8914	0.99903	0.99
E11 Non-insulin-dependent diabetes mellitus	rs6058040	20	33013751	G	0.00042577	0.29565	0.491266	0.9483	0.999265	1.01
E11 Non-insulin-dependent diabetes mellitus	rs73106933	20	33287425	C	0.00042819	0.29632	0.451384	0.6095	0.992839	1.01
E11 Non-insulin-dependent diabetes mellitus	rs6059827	20	33016358	A	0.00042512	0.29633	0.49117	0.932	0.999636	1.01
E11 Non-insulin-dependent diabetes mellitus	rs6119497	20	33012529	A	0.00042454	0.29704	0.49108	0.9428	0.999389	1.01
E11 Non-insulin-dependent diabetes mellitus	rs6059868	20	33079460	G	0.00042437	0.29716	0.491189	0.9864	0.999521	1.01
E11 Non-insulin-dependent diabetes mellitus	rs6088528	20	33156742	A	0.00042516	0.29743	0.485807	0.6442	0.995157	1.01
E11 Non-insulin-dependent diabetes mellitus	rs13043504	20	32946904	C	-0.00042454	0.2975	0.490645	0.9455	0.997468	0.99
E11 Non-insulin-dependent diabetes mellitus	rs2424992	20	33012060	T	0.0004239	0.29779	0.491057	0.9428	0.999344	1.01
E11 Non-insulin-dependent diabetes mellitus	rs13044031	20	33123035	A	-0.00093843	0.29799	0.05432	8.724e-06	genotyped	0.978
E11 Non-insulin-dependent diabetes mellitus	rs6088483	20	32984714	A	-0.00042309	0.29864	0.491274	0.9646	0.999341	0.99
E11 Non-insulin-dependent diabetes mellitus	rs13040777	20	33286908	A	0.00042543	0.29891	0.451862	0.5836	0.995132	1.01
E11 Non-insulin-dependent diabetes mellitus	rs6059829	20	33017074	A	0.00042279	0.29897	0.49113	0.9374	0.999646	1.01
E11 Non-insulin-dependent diabetes mellitus	rs6059872	20	33082775	A	0.00042251	0.29928	0.491021	0.9782	0.999666	1.01
E11 Non-insulin-dependent diabetes mellitus	rs6088484	20	32985961	C	-0.00042253	0.29928	0.49128	0.9646	0.999353	0.99
E11 Non-insulin-dependent diabetes mellitus	rs6058073	20	33116483	C	0.0004225	0.29937	0.491039	0.9809	0.999085	1.01
E11 Non-insulin-dependent diabetes mellitus	rs4277599	20	33008905	C	-0.00042245	0.29938	0.491297	0.97	0.999428	0.99
E11 Non-insulin-dependent diabetes mellitus	rs6058209	20	33821577	A	0.00045299	0.2994	0.320561	0.7475	0.995704	1.01
E11 Non-insulin-dependent diabetes mellitus	rs6120650	20	33039973	A	0.00042225	0.29958	0.491021	0.9293	0.999731	1.01
E11 Non-insulin-dependent diabetes mellitus	rs6088508	20	33060081	G	0.00042201	0.29992	0.491155	0.9973	0.998882	1.01
E11 Non-insulin-dependent diabetes mellitus	rs6058059	20	33070159	T	0.00042183	0.30005	0.491029	0.9782	0.999648	1.01
E11 Non-insulin-dependent diabetes mellitus	rs6120666	20	33090718	G	0.00042173	0.3002	0.490966	0.9946	0.999296	1.01
E11 Non-insulin-dependent diabetes mellitus	rs6059851	20	33047945	A	0.00042167	0.30023	0.491168	0.9564	0.999511	1.01
E11 Non-insulin-dependent diabetes mellitus	rs6059890	20	33101653	C	0.00042154	0.30039	0.491187	0.9946	0.999217	1.01
E11 Non-insulin-dependent diabetes mellitus	rs6058057	20	33065283	A	0.00042145	0.30049	0.491033	0.9918	0.999619	1.01
E11 Non-insulin-dependent diabetes mellitus	rs6059835	20	33020141	G	0.00042129	0.3007	0.491142	0.9266	0.999664	1.01
E11 Non-insulin-dependent diabetes mellitus	rs6059834	20	33019299	G	0.00042127	0.30075	0.49117	0.9293	0.999561	1.01
E11 Non-insulin-dependent diabetes mellitus	rs4911420	20	32998654	C	-0.00042122	0.30086	0.491168	0.9728	0.999074	0.99
E11 Non-insulin-dependent diabetes mellitus	rs6059887	20	33101102	G	0.00042118	0.30086	0.490931	0.9918	0.999283	1.01
E11 Non-insulin-dependent diabetes mellitus	rs8125522	20	32992324	C	-0.00042122	0.30086	0.491167	0.9728	0.999027	0.99
E11 Non-insulin-dependent diabetes mellitus	rs2378204	20	33067904	G	0.00042104	0.30096	0.491039	0.9864	0.999595	1.01
E11 Non-insulin-dependent diabetes mellitus	rs6059897	20	33113224	G	0.0004209	0.30121	0.491221	0.9891	0.998943	1.01
E11 Non-insulin-dependent diabetes mellitus	rs4911417	20	32970606	G	-0.00042081	0.30124	0.491268	0.9619	0.999429	0.99
E11 Non-insulin-dependent diabetes mellitus	rs6088478	20	32971719	C	-0.00042073	0.30133	0.491266	0.9619	0.999426	0.99
E11 Non-insulin-dependent diabetes mellitus	rs6059840	20	33030405	A	0.00042072	0.30136	0.491157	0.9293	0.999638	1.01
E11 Non-insulin-dependent diabetes mellitus	rs6120644	20	33023810	A	0.00042073	0.30137	0.491143	0.9293	0.999583	1.01
E11 Non-insulin-dependent diabetes mellitus	rs2144717	20	33076333	G	0.0004206	0.30152	0.490954	0.9946	0.999226	1.01
E11 Non-insulin-dependent diabetes mellitus	rs6059845	20	33036500	A	0.00042056	0.30154	0.491197	0.9211	0.999535	1.01
E11 Non-insulin-dependent diabetes mellitus	rs6087579	20	32985155	G	-0.00042041	0.30172	0.491304	0.9592	0.999044	0.99
E11 Non-insulin-dependent diabetes mellitus	rs6059892	20	33105766	G	0.00042038	0.30173	0.491039	0.9973	0.999384	1.01
E11 Non-insulin-dependent diabetes mellitus	rs6120645	20	33025171	T	0.00042034	0.3018	0.49114	0.9293	0.999653	1.01
E11 Non-insulin-dependent diabetes mellitus	rs6059866	20	33075810	G	0.00042041	0.30185	0.491248	1	0.998904	1.01
E11 Non-insulin-dependent diabetes mellitus	rs6059882	20	33090167	C	0.00042026	0.30187	0.491235	0.9782	0.999155	1.01
E11 Non-insulin-dependent diabetes mellitus	rs2889850	20	33010647	C	-0.0004202	0.30194	0.49114	0.9673	0.999639	0.99
E11 Non-insulin-dependent diabetes mellitus	rs6141469	20	33004002	C	-0.00042018	0.30197	0.491144	0.9619	0.999588	0.99
E11 Non-insulin-dependent diabetes mellitus	rs6120668	20	33099793	G	0.00041964	0.30268	0.490914	1	0.998964	1.01
E11 Non-insulin-dependent diabetes mellitus	rs6087574	20	32948753	C	-0.00041958	0.30275	0.489982	0.9265	0.999477	0.99
E11 Non-insulin-dependent diabetes mellitus	rs945674	20	32964247	C	-0.00041941	0.30287	0.491104	0.9564	0.999557	0.99
E11 Non-insulin-dependent diabetes mellitus	rs6058094	20	33224174	T	0.00042128	0.30309	0.45053	0.7301	0.998671	1.01
E11 Non-insulin-dependent diabetes mellitus	rs6059863	20	33069600	G	0.00041913	0.30317	0.491234	0.9891	0.999206	1.01
E11 Non-insulin-dependent diabetes mellitus	rs1890000	20	32968312	T	-0.00041891	0.30345	0.491311	0.9483	0.999232	0.99
E11 Non-insulin-dependent diabetes mellitus	rs4911418	20	32994257	A	-0.00041886	0.30356	0.49101	0.9728	0.999318	0.99
E11 Non-insulin-dependent diabetes mellitus	rs4911419	20	32995873	A	-0.00041886	0.30356	0.49101	0.9728	0.999357	0.99
E11 Non-insulin-dependent diabetes mellitus	rs6088489	20	32997945	G	-0.00041885	0.30357	0.49101	0.9728	0.99935	0.99
E11 Non-insulin-dependent diabetes mellitus	rs6579165	20	32994715	G	-0.00041881	0.30362	0.491012	0.97	0.999319	0.99
E11 Non-insulin-dependent diabetes mellitus	rs3761147	20	32996689	T	-0.00041881	0.30363	0.491012	0.9728	0.999307	0.99
E11 Non-insulin-dependent diabetes mellitus	rs6059855	20	33057328	G	0.00041861	0.30375	0.491024	0.9592	0.999687	1.01
E11 Non-insulin-dependent diabetes mellitus	rs4911422	20	32999345	C	-0.00041868	0.30377	0.491014	0.9728	0.99932	0.99
E11 Non-insulin-dependent diabetes mellitus	rs6058029	20	32969643	C	-0.00041858	0.3038	0.49111	0.9619	0.999764	0.99
E11 Non-insulin-dependent diabetes mellitus	rs2184836	20	32963369	G	-0.00041859	0.30381	0.49109	0.9564	0.999673	0.99
E11 Non-insulin-dependent diabetes mellitus	rs6087587	20	33058628	T	0.00041854	0.30383	0.49102	0.9592	0.999696	1.01
E11 Non-insulin-dependent diabetes mellitus	rs6059797	20	32971424	A	-0.00041849	0.3039	0.49111	0.9619	0.99977	0.99
E11 Non-insulin-dependent diabetes mellitus	rs6088479	20	32971736	C	-0.00041848	0.30391	0.49111	0.9646	0.999768	0.99
E11 Non-insulin-dependent diabetes mellitus	rs73097037	20	32974167	C	0.00086585	0.304	0.0644463	0.3185	0.965167	1.02
E11 Non-insulin-dependent diabetes mellitus	rs6059861	20	33068563	T	0.00041837	0.30409	0.491115	1	0.999255	1.01
E11 Non-insulin-dependent diabetes mellitus	rs6087592	20	33114503	G	0.00041842	0.30411	0.491153	0.9946	0.998486	1.01
E11 Non-insulin-dependent diabetes mellitus	rs6059779	20	32950325	T	-0.00041838	0.30414	0.489956	0.932	0.999373	0.99
E11 Non-insulin-dependent diabetes mellitus	rs2378135	20	32962926	C	-0.00041808	0.30439	0.491075	0.9673	0.999643	0.99
E11 Non-insulin-dependent diabetes mellitus	rs6058051	20	33044862	A	0.00041796	0.3045	0.49102	0.9483	0.999732	1.01
E11 Non-insulin-dependent diabetes mellitus	rs6579161	20	32948784	C	-0.00041804	0.3045	0.490003	0.9293	0.999568	0.99
E11 Non-insulin-dependent diabetes mellitus	rs3736762	20	33037336	T	0.00041793	0.30459	0.491076	0.9157	0.999607	1.01
E11 Non-insulin-dependent diabetes mellitus	rs2225837	20	33005634	T	-0.00041783	0.30469	0.491123	0.9619	0.999566	0.99
E11 Non-insulin-dependent diabetes mellitus	rs6088488	20	32992631	C	-0.00041783	0.30475	0.490998	0.9728	0.999448	0.99
E11 Non-insulin-dependent diabetes mellitus	rs6120669	20	33105028	C	0.0004175	0.30507	0.490984	0.9837	0.999229	1.01
E11 Non-insulin-dependent diabetes mellitus	rs4911421	20	32998948	C	-0.00041753	0.30511	0.491019	0.9673	0.999317	0.99
E11 Non-insulin-dependent diabetes mellitus	rs6059843	20	33036128	G	0.00041736	0.30523	0.491235	0.9157	0.999501	1.01
E11 Non-insulin-dependent diabetes mellitus	rs6088527	20	33155841	T	0.00041791	0.30568	0.485678	0.6443	0.995702	1.01
E11 Non-insulin-dependent diabetes mellitus	rs6141471	20	33006730	G	-0.00041664	0.30607	0.491204	0.9918	0.999348	0.99
E11 Non-insulin-dependent diabetes mellitus	rs6059850	20	33044784	G	0.00041644	0.30627	0.491017	0.9592	0.999657	1.01
E11 Non-insulin-dependent diabetes mellitus	rs764597	20	33161225	A	0.00041726	0.30642	0.485678	0.6369	0.995761	1.01
E11 Non-insulin-dependent diabetes mellitus	rs9789792	20	32957709	A	-0.00041628	0.30648	0.491184	0.9973	0.999312	0.99
E11 Non-insulin-dependent diabetes mellitus	rs2295444	20	33173883	T	0.00041693	0.3068	0.485762	0.6127	0.995834	1.01
E11 Non-insulin-dependent diabetes mellitus	rs4911423	20	32999386	A	-0.00041536	0.30763	0.491075	0.9946	0.998994	0.99
E11 Non-insulin-dependent diabetes mellitus	rs1884669	20	33171287	A	0.00041565	0.30827	0.485738	0.6296	0.995829	1.01
E11 Non-insulin-dependent diabetes mellitus	rs6087600	20	33157217	C	0.0004149	0.30917	0.485669	0.6394	0.995704	1.01
E11 Non-insulin-dependent diabetes mellitus	rs6088662	20	33547633	G	0.0005302	0.31019	0.186657	0.3667	0.997028	1.01
E11 Non-insulin-dependent diabetes mellitus	rs6119548	20	33552612	G	0.00052957	0.31094	0.186249	0.3601	0.998072	1.01
E11 Non-insulin-dependent diabetes mellitus	rs11698868	20	33549946	T	0.00052712	0.31317	0.186368	0.3573	0.997626	1.01
E11 Non-insulin-dependent diabetes mellitus	rs13041792	20	33545055	A	0.00052571	0.31455	0.186428	0.326	0.996853	1.01
E11 Non-insulin-dependent diabetes mellitus	rs13041102	20	33369011	A	0.00096447	0.31557	0.0484813	0.1011	0.968381	1.02
E11 Non-insulin-dependent diabetes mellitus	rs6059926	20	33164804	T	0.00040936	0.31565	0.485778	0.674	0.995759	1.01
E11 Non-insulin-dependent diabetes mellitus	rs111691147	20	33177202	C	0.0012842	0.31601	0.0262162	0.249	0.986807	1.03
E11 Non-insulin-dependent diabetes mellitus	rs6059774	20	32935192	G	-0.00040568	0.31922	0.48969	0.9292	0.998194	0.99
E11 Non-insulin-dependent diabetes mellitus	rs6120620	20	32934054	A	-0.00040554	0.31936	0.489695	0.9347	0.998254	0.99
E11 Non-insulin-dependent diabetes mellitus	rs6059893	20	33105897	G	0.00040437	0.32053	0.491302	0.9918	0.999178	1.01
E11 Non-insulin-dependent diabetes mellitus	rs6059844	20	33036482	A	-0.00040531	0.32101	0.4949	0.03668	genotyped	0.99
E11 Non-insulin-dependent diabetes mellitus	rs3746455	20	32957216	A	-0.00040339	0.3217	0.490568	0.97	0.999649	0.99
E11 Non-insulin-dependent diabetes mellitus	rs2378205	20	33110803	G	0.00040326	0.32187	0.491099	0.9946	0.999447	1.01
E11 Non-insulin-dependent diabetes mellitus	rs6120775	20	33557564	C	0.00051749	0.32198	0.186265	0.3631	0.998555	1.01
E11 Non-insulin-dependent diabetes mellitus	rs6120772	20	33554761	T	0.00051436	0.325	0.186245	0.3397	0.99832	1.01
E11 Non-insulin-dependent diabetes mellitus	rs4911152	20	32955024	C	-0.00039762	0.3287	0.490587	0.9918	0.999401	0.991
E11 Non-insulin-dependent diabetes mellitus	rs6059988	20	33278101	C	0.00040003	0.32875	0.451487	0.5314	0.994957	1.01
E11 Non-insulin-dependent diabetes mellitus	rs6059989	20	33279604	G	0.0003985	0.33059	0.451678	0.4355	0.994878	1.01
E11 Non-insulin-dependent diabetes mellitus	rs6060308	20	33794378	A	0.0004513	0.33201	0.263744	0.4353	0.981337	1.01
E11 Non-insulin-dependent diabetes mellitus	rs6058105	20	33271719	T	0.00039474	0.33489	0.451579	0.6666	0.996566	1.01
E11 Non-insulin-dependent diabetes mellitus	rs6579186	20	33282198	C	0.00039042	0.34044	0.451942	0.528	0.994993	1.01
E11 Non-insulin-dependent diabetes mellitus	rs36012778	20	32579941	T	-0.00085783	0.34122	0.05405	0.2497	genotyped	0.98
E11 Non-insulin-dependent diabetes mellitus	rs6088765	20	33799280	T	-0.00039314	0.34128	0.4182	0.2795	genotyped	0.991
E11 Non-insulin-dependent diabetes mellitus	rs6087577	20	32955423	G	-0.00038665	0.34372	0.4897	0.06474	genotyped	0.991
E11 Non-insulin-dependent diabetes mellitus	rs6059991	20	33280836	T	0.00038777	0.3438	0.451849	0.4155	0.994513	1.01
E11 Non-insulin-dependent diabetes mellitus	rs6059992	20	33282275	C	0.00038533	0.34671	0.452218	0.5101	0.994883	1.01
E11 Non-insulin-dependent diabetes mellitus	rs35937789	20	32993390	C	-0.00084317	0.3487	0.05418	0.9867	genotyped	0.98
E11 Non-insulin-dependent diabetes mellitus	rs6087580	20	32992592	G	-0.00037993	0.35082	0.490618	0.932	0.998595	0.991
E11 Non-insulin-dependent diabetes mellitus	rs6088498	20	33020446	G	0.0003785	0.35261	0.490737	0.8914	0.998696	1.01
E11 Non-insulin-dependent diabetes mellitus	rs3891369	20	33161127	T	0.00037623	0.35652	0.485299	0.5818	0.995174	1.01
E11 Non-insulin-dependent diabetes mellitus	rs11700080	20	33046761	G	0.00064306	0.3683	0.0898452	0.7862	0.990358	1.02
E11 Non-insulin-dependent diabetes mellitus	rs11699564	20	33021940	C	0.00063698	0.37281	0.08989	0.7623	0.990043	1.02
E11 Non-insulin-dependent diabetes mellitus	rs8115656	20	33282780	C	0.0003633	0.37528	0.451292	0.5234	0.994312	1.01
E11 Non-insulin-dependent diabetes mellitus	rs111360968	20	33495069	T	0.0011262	0.37659	0.0261875	0.1777	0.999481	1.03
E11 Non-insulin-dependent diabetes mellitus	rs1884667	20	33285505	A	0.00035741	0.38262	0.452209	0.4993	0.995704	1.01
E11 Non-insulin-dependent diabetes mellitus	rs1884668	20	33285514	G	0.00035667	0.38364	0.45214	0.4905	0.995582	1.01
E11 Non-insulin-dependent diabetes mellitus	rs6088580	20	33285053	C	0.00035659	0.3837	0.452179	0.4883	0.995727	1.01
E11 Non-insulin-dependent diabetes mellitus	rs41287074	20	33502809	A	-0.0011061	0.38492	0.02624	0.2669	genotyped	0.974
E11 Non-insulin-dependent diabetes mellitus	rs6579227	20	33879206	T	0.00053127	0.38628	0.12632	0.03688	0.992977	1.01
E11 Non-insulin-dependent diabetes mellitus	rs6088536	20	33189106	C	0.00035285	0.38713	0.482728	0.4896	0.996292	1.01
E11 Non-insulin-dependent diabetes mellitus	rs6059938	20	33187130	A	0.00035131	0.3892	0.48275	0.4939	0.996304	1.01
E11 Non-insulin-dependent diabetes mellitus	rs6087605	20	33180624	T	0.00034852	0.39297	0.482677	0.5312	0.996271	1.01
E11 Non-insulin-dependent diabetes mellitus	rs143975064	20	33772728	A	0.00079476	0.39414	0.0528687	0.7091	0.949018	1.02
E11 Non-insulin-dependent diabetes mellitus	rs6058084	20	33183804	T	0.00034623	0.39611	0.482691	0.5245	0.996215	1.01
E11 Non-insulin-dependent diabetes mellitus	rs2425052	20	33880729	A	-0.00034775	0.39726	0.4334	0.7544	genotyped	0.992
E11 Non-insulin-dependent diabetes mellitus	rs6059932	20	33175466	T	0.00034229	0.40155	0.482864	0.5562	0.995935	1.01
E11 Non-insulin-dependent diabetes mellitus	rs6088788	20	33882720	G	0.00034064	0.40776	0.436518	0.6619	0.99168	1.01
E11 Non-insulin-dependent diabetes mellitus	rs6059956	20	33220070	C	0.0003335	0.41294	0.484625	0.6943	0.999177	1.01
E11 Non-insulin-dependent diabetes mellitus	rs79907658	20	34108545	G	-0.0011004	0.42378	0.02235	0.3844	genotyped	0.974
E11 Non-insulin-dependent diabetes mellitus	rs45465702	20	33320571	T	-0.00041958	0.4267	0.1825	0.08978	genotyped	0.99
E11 Non-insulin-dependent diabetes mellitus	rs6088776	20	33835773	C	0.00046837	0.42733	0.138563	0.9828	0.994626	1.01
E11 Non-insulin-dependent diabetes mellitus	rs34204895	20	33193313	C	-0.00055066	0.44236	0.08877	0.4802	genotyped	0.987
E11 Non-insulin-dependent diabetes mellitus	rs56289635	20	33730759	A	-0.00045584	0.44369	0.142909	0.1712	0.949646	0.989
E11 Non-insulin-dependent diabetes mellitus	rs72497006	20	32909056	A	-0.00033752	0.44777	0.302752	0.1967	0.993429	0.992
E11 Non-insulin-dependent diabetes mellitus	rs6141488	20	33192746	G	-0.00033126	0.44822	0.32726	0.3667	0.985915	0.992
E11 Non-insulin-dependent diabetes mellitus	rs3053708	20	33575347	CAT	-0.00033715	0.44944	0.3028	4.567e-09	genotyped	0.992
E11 Non-insulin-dependent diabetes mellitus	rs1415775	20	33765771	C	-0.00034028	0.45173	0.2871	0.001419	genotyped	0.992
E11 Non-insulin-dependent diabetes mellitus	rs7268701	20	32901960	T	0.00031315	0.45298	0.441511	0.2835	0.962227	1.01
E11 Non-insulin-dependent diabetes mellitus	rs6088466	20	32913534	A	-0.0003312	0.45597	0.303065	0.1765	0.994651	0.992
E11 Non-insulin-dependent diabetes mellitus	rs6059934	20	33178324	T	0.00030421	0.45598	0.482326	0.4851	0.995768	1.01
E11 Non-insulin-dependent diabetes mellitus	rs2425053	20	33881820	G	0.00037062	0.4616	0.205197	0.04832	0.998398	1.01
E11 Non-insulin-dependent diabetes mellitus	rs6142154	20	32970673	T	-0.00032444	0.46468	0.302474	0.1871	0.998287	0.992
E11 Non-insulin-dependent diabetes mellitus	rs7272884	20	33883015	G	-0.00036868	0.46499	0.2043	0.2601	genotyped	0.991
E11 Non-insulin-dependent diabetes mellitus	rs11167234	20	32983619	A	-0.00032378	0.46556	0.302494	0.183	0.997543	0.992
E11 Non-insulin-dependent diabetes mellitus	rs2425048	20	33872723	T	0.00044769	0.46841	0.124364	0.03267	0.992176	1.01
E11 Non-insulin-dependent diabetes mellitus	rs6142152	20	32960877	A	-0.00032163	0.46858	0.302481	0.201	0.998034	0.992
E11 Non-insulin-dependent diabetes mellitus	rs8122819	20	33881586	T	0.00036345	0.47047	0.205021	0.05374	0.998637	1.01
E11 Non-insulin-dependent diabetes mellitus	rs61341205	20	33072578	A	0.00036579	0.47128	0.2042	0.0002675	genotyped	1.01
E11 Non-insulin-dependent diabetes mellitus	rs2425023	20	33832494	C	0.00031021	0.47311	0.33516	0.8934	0.992037	1.01
E11 Non-insulin-dependent diabetes mellitus	rs2425041	20	33859013	A	0.00042674	0.47506	0.134962	0.344	0.989529	1.01
E11 Non-insulin-dependent diabetes mellitus	rs112265587	20	33319716	C	0.0006227	0.47612	0.0583025	0.5187	0.98714	1.01
E11 Non-insulin-dependent diabetes mellitus	rs6088485	20	32985992	T	-0.00031596	0.47629	0.302835	0.2158	0.997876	0.993
E11 Non-insulin-dependent diabetes mellitus	rs6142147	20	32953344	G	-0.00031545	0.47707	0.302506	0.1981	0.998523	0.993
E11 Non-insulin-dependent diabetes mellitus	rs2425024	20	33844938	A	-0.00030923	0.47719	0.3234	0.9876	genotyped	0.993
E11 Non-insulin-dependent diabetes mellitus	rs6058219	20	33859244	C	0.00042224	0.47935	0.13529	0.319	0.988947	1.01
E11 Non-insulin-dependent diabetes mellitus	rs6058224	20	33881774	A	0.00035512	0.48071	0.205053	0.05184	0.998322	1.01
E11 Non-insulin-dependent diabetes mellitus	rs2425046	20	33871661	C	0.00043476	0.48152	0.12451	0.03471	0.990593	1.01
E11 Non-insulin-dependent diabetes mellitus	rs113921126	20	33326680	C	0.00062188	0.48278	0.0576976	0.5074	0.969594	1.01
E11 Non-insulin-dependent diabetes mellitus	rs2064705	20	33031276	C	0.00031015	0.48461	0.302527	0.1778	0.998048	1.01
E11 Non-insulin-dependent diabetes mellitus	rs639763	20	33861904	T	0.00035621	0.48465	0.201371	0.1508	0.987589	1.01
E11 Non-insulin-dependent diabetes mellitus	rs2425040	20	33858878	A	0.00041648	0.4855	0.135143	0.3873	0.989272	1.01
E11 Non-insulin-dependent diabetes mellitus	rs55829662	20	33731625	C	0.00032121	0.48724	0.26254	0.5036	0.999375	1.01
E11 Non-insulin-dependent diabetes mellitus	rs7361656	20	33729147	G	0.00031546	0.49545	0.262433	0.4814	0.997747	1.01
E11 Non-insulin-dependent diabetes mellitus	rs6058150	20	33556817	T	0.00029313	0.49711	0.33446	0.5451	0.996537	1.01
E11 Non-insulin-dependent diabetes mellitus	rs6087613	20	33238981	A	-0.00042337	0.49877	0.123936	0.2307	0.974516	0.99
E11 Non-insulin-dependent diabetes mellitus	rs633784	20	33726323	G	-0.00030969	0.50348	0.262774	0.5428	0.996112	0.993
E11 Non-insulin-dependent diabetes mellitus	rs6060299	20	33780508	G	-0.00030064	0.50541	0.286877	0.7737	0.99185	0.993
E11 Non-insulin-dependent diabetes mellitus	rs2378346	20	33854104	G	0.00039398	0.50796	0.135559	0.2659	0.99425	1.01
E11 Non-insulin-dependent diabetes mellitus	rs4911474	20	33780297	G	-0.00029874	0.50809	0.286831	0.7514	0.992262	0.993
E11 Non-insulin-dependent diabetes mellitus	rs7260770	20	33552653	A	0.00028467	0.50965	0.334313	0.5656	0.996424	1.01
E11 Non-insulin-dependent diabetes mellitus	rs1555322	20	33849179	G	-0.00039265	0.51045	0.1345	0.9011	genotyped	0.991
E11 Non-insulin-dependent diabetes mellitus	rs2425027	20	33849390	G	0.00038913	0.51313	0.135039	0.2874	0.998861	1.01
E11 Non-insulin-dependent diabetes mellitus	rs6120777	20	33560172	A	0.00036565	0.51321	0.159354	0.1836	0.986122	1.01
E11 Non-insulin-dependent diabetes mellitus	rs6088760	20	33773266	C	0.00029411	0.51336	0.287361	0.7359	0.998547	1.01
E11 Non-insulin-dependent diabetes mellitus	rs6060132	20	33556695	A	0.00028029	0.51611	0.334256	0.5866	0.996923	1.01
E11 Non-insulin-dependent diabetes mellitus	rs647515	20	33727050	G	-0.00029966	0.51761	0.262274	0.5337	0.996569	0.993
E11 Non-insulin-dependent diabetes mellitus	rs2425031	20	33855284	C	0.00038492	0.51797	0.13559	0.2536	0.992883	1.01
E11 Non-insulin-dependent diabetes mellitus	rs2425037	20	33856429	T	0.00038525	0.51833	0.135232	0.2686	0.991418	1.01
E11 Non-insulin-dependent diabetes mellitus	rs2425045	20	33869824	C	0.00032245	0.52068	0.207579	0.04617	0.99555	1.01
E11 Non-insulin-dependent diabetes mellitus	rs1205411	20	33857242	T	0.00038265	0.5211	0.135341	0.227	0.990808	1.01
E11 Non-insulin-dependent diabetes mellitus	rs2425034	20	33855814	C	0.00038104	0.52248	0.135337	0.2783	0.993029	1.01
E11 Non-insulin-dependent diabetes mellitus	rs2425036	20	33855981	C	0.00038104	0.52252	0.135331	0.2815	0.992757	1.01
E11 Non-insulin-dependent diabetes mellitus	rs2425051	20	33880363	T	0.00026217	0.5236	0.427896	0.3836	0.99755	1.01
E11 Non-insulin-dependent diabetes mellitus	rs6060307	20	33792932	C	-0.00028909	0.52367	0.286567	0.8499	0.983151	0.993
E11 Non-insulin-dependent diabetes mellitus	rs3761142	20	33545816	T	0.00027424	0.52526	0.334435	0.5631	0.996282	1.01
E11 Non-insulin-dependent diabetes mellitus	rs2425035	20	33855819	C	0.00037842	0.52534	0.135344	0.2783	0.992994	1.01
E11 Non-insulin-dependent diabetes mellitus	rs2224320	20	33791590	C	-0.00028744	0.52563	0.286751	0.7953	0.985549	0.993
E11 Non-insulin-dependent diabetes mellitus	rs36078366	20	33215724	G	0.00046024	0.52673	0.0874192	0.8145	0.980778	1.01
E11 Non-insulin-dependent diabetes mellitus	rs4911165	20	33550382	C	0.00027149	0.52916	0.335038	0.6325	0.996541	1.01
E11 Non-insulin-dependent diabetes mellitus	rs141121880	20	34394901	T	0.00077182	0.52956	0.0284322	0.4884	0.991842	1.02
E11 Non-insulin-dependent diabetes mellitus	rs666210	20	33723810	C	-0.0002909	0.53015	0.262183	0.5164	0.995753	0.993
E11 Non-insulin-dependent diabetes mellitus	rs6060305	20	33788582	G	-0.00028102	0.5339	0.286969	0.7705	0.989909	0.993
E11 Non-insulin-dependent diabetes mellitus	rs6119595	20	33869301	T	0.00031137	0.53518	0.207735	0.04561	0.994654	1.01
E11 Non-insulin-dependent diabetes mellitus	rs627106	20	33866029	T	-0.0003127	0.53532	0.205771	0.05707	0.991929	0.993
E11 Non-insulin-dependent diabetes mellitus	rs591590	20	33866028	G	-0.00031238	0.53572	0.205783	0.0564	0.991973	0.993
E11 Non-insulin-dependent diabetes mellitus	rs3787212	20	33545540	A	0.00026663	0.5369	0.334139	0.5708	0.99632	1.01
E11 Non-insulin-dependent diabetes mellitus	rs79965102	20	33593847	A	0.00054192	0.53835	0.0574254	0.778	0.985757	1.01
E11 Non-insulin-dependent diabetes mellitus	rs6060304	20	33788350	T	-0.00027763	0.53876	0.286971	0.742	0.990623	0.993
E11 Non-insulin-dependent diabetes mellitus	rs6060341	20	33863633	G	0.0003101	0.53879	0.206074	0.06174	0.990302	1.01
E11 Non-insulin-dependent diabetes mellitus	rs2425047	20	33871675	C	0.00030776	0.54029	0.206729	0.06171	0.996246	1.01
E11 Non-insulin-dependent diabetes mellitus	rs112171725	20	33442047	G	-0.00054042	0.54407	0.05536	0.8585	genotyped	0.987
E11 Non-insulin-dependent diabetes mellitus	rs2275275	20	33872311	C	0.0003028	0.54659	0.206821	0.06033	0.997144	1.01
E11 Non-insulin-dependent diabetes mellitus	rs2297789	20	33867248	T	0.00030287	0.54792	0.205899	0.06284	0.993117	1.01
E11 Non-insulin-dependent diabetes mellitus	rs6088658	20	33540489	C	0.00025872	0.54821	0.337402	0.4712	0.995746	1.01
E11 Non-insulin-dependent diabetes mellitus	rs2378261	20	33538384	T	0.0002586	0.54836	0.337448	0.4665	0.995834	1.01
E11 Non-insulin-dependent diabetes mellitus	rs2424993	20	33104592	C	0.00026629	0.54892	0.3019	0.02554	genotyped	1.01
E11 Non-insulin-dependent diabetes mellitus	rs4911429	20	33133553	A	-0.00026898	0.54897	0.307145	0.7618	0.963995	0.994
E11 Non-insulin-dependent diabetes mellitus	rs2425042	20	33865895	A	0.00030356	0.5499	0.202235	0.08882	0.992215	1.01
E11 Non-insulin-dependent diabetes mellitus	rs4911455	20	33553062	C	0.00025733	0.55008	0.337669	0.4976	0.997023	1.01
E11 Non-insulin-dependent diabetes mellitus	rs6060301	20	33783242	T	-0.00026933	0.55075	0.287338	0.7485	0.990915	0.994
E11 Non-insulin-dependent diabetes mellitus	rs73106997	20	33375138	T	0.00033356	0.55139	0.166712	0.04442	0.947745	1.01
E11 Non-insulin-dependent diabetes mellitus	rs7269526	20	33053293	C	-0.00030117	0.55167	0.203257	0.4711	0.998702	0.993
E11 Non-insulin-dependent diabetes mellitus	rs2425049	20	33874720	C	-0.00029877	0.55183	0.2084	0.6304	genotyped	0.993
E11 Non-insulin-dependent diabetes mellitus	rs932562	20	33871310	C	0.00029746	0.55388	0.206761	0.05158	0.996305	1.01
E11 Non-insulin-dependent diabetes mellitus	rs1122174	20	33110846	C	0.00029892	0.55402	0.20388	0.5185	0.999431	1.01
E11 Non-insulin-dependent diabetes mellitus	rs2050652	20	33733180	G	-0.00027389	0.55433	0.2639	0.05367	genotyped	0.993
E11 Non-insulin-dependent diabetes mellitus	rs6088515	20	33110042	A	0.00029698	0.55654	0.203954	0.4952	0.999403	1.01
E11 Non-insulin-dependent diabetes mellitus	rs6060212	20	33676951	C	-0.00024516	0.55749	0.388017	0.4682	0.998348	0.994
E11 Non-insulin-dependent diabetes mellitus	rs6058149	20	33554488	G	0.00025253	0.55759	0.337406	0.5	0.997161	1.01
E11 Non-insulin-dependent diabetes mellitus	rs6120889	20	33870053	A	0.00029478	0.55762	0.206764	0.05219	0.995369	1.01
E11 Non-insulin-dependent diabetes mellitus	rs6060215	20	33677860	A	-0.00024491	0.55787	0.387987	0.453	0.998492	0.994
E11 Non-insulin-dependent diabetes mellitus	rs6060214	20	33677669	T	-0.00024461	0.55836	0.388003	0.4595	0.998436	0.994
E11 Non-insulin-dependent diabetes mellitus	rs6088704	20	33677621	C	-0.00024456	0.55843	0.388003	0.4616	0.998439	0.994
E11 Non-insulin-dependent diabetes mellitus	rs7004	20	33866753	C	0.00029635	0.5592	0.202352	0.08333	0.992989	1.01
E11 Non-insulin-dependent diabetes mellitus	rs6060137	20	33565480	C	-0.00025686	0.56053	0.3084	0.08142	genotyped	0.994
E11 Non-insulin-dependent diabetes mellitus	rs6060127	20	33538999	C	0.00025	0.56181	0.337164	0.464	0.995958	1.01
E11 Non-insulin-dependent diabetes mellitus	rs13038162	20	33678071	T	-0.0002406	0.56525	0.389005	0.4704	0.995426	0.994
E11 Non-insulin-dependent diabetes mellitus	rs6142298	20	33688417	G	-0.00023891	0.56545	0.403272	0.6833	0.996253	0.994
E11 Non-insulin-dependent diabetes mellitus	rs6060216	20	33678078	C	-0.00023974	0.56663	0.388988	0.4704	0.995495	0.994
E11 Non-insulin-dependent diabetes mellitus	rs2425010	20	33581540	T	-0.00023898	0.56728	0.38802	0.5608	0.999297	0.994
E11 Non-insulin-dependent diabetes mellitus	rs6060347	20	33874151	G	0.00028686	0.56753	0.206976	0.05439	0.998382	1.01
E11 Non-insulin-dependent diabetes mellitus	rs6060128	20	33540587	T	0.00024637	0.56755	0.337135	0.4664	0.995831	1.01
E11 Non-insulin-dependent diabetes mellitus	rs17310328	20	33540565	C	0.00024628	0.5677	0.337137	0.4641	0.99584	1.01
E11 Non-insulin-dependent diabetes mellitus	rs1475070	20	33563099	T	0.00024638	0.56828	0.333557	0.397	0.997689	1.01
E11 Non-insulin-dependent diabetes mellitus	rs1998231	20	33598419	T	-0.00023816	0.56852	0.388235	0.4361	0.999922	0.994
E11 Non-insulin-dependent diabetes mellitus	rs6060143	20	33579073	C	-0.000252	0.56868	0.304634	0.3368	0.999576	0.994
E11 Non-insulin-dependent diabetes mellitus	rs6060303	20	33785956	G	-0.00025694	0.56925	0.287433	0.7675	0.990949	0.994
E11 Non-insulin-dependent diabetes mellitus	rs6088665	20	33551218	G	0.00024487	0.56951	0.338008	0.46	0.996736	1.01
E11 Non-insulin-dependent diabetes mellitus	rs2250205	20	33867924	A	0.00028589	0.56978	0.206957	0.0522	0.993352	1.01
E11 Non-insulin-dependent diabetes mellitus	rs2425009	20	33578899	C	-0.00025107	0.57012	0.304638	0.3408	0.99957	0.994
E11 Non-insulin-dependent diabetes mellitus	rs2425043	20	33868702	C	0.00028545	0.5703	0.206937	0.05284	0.993562	1.01
E11 Non-insulin-dependent diabetes mellitus	rs2425044	20	33869735	T	0.00028724	0.5703	0.203232	0.06961	0.995186	1.01
E11 Non-insulin-dependent diabetes mellitus	rs6088660	20	33542896	T	0.0002438	0.57152	0.337167	0.4712	0.996174	1.01
E11 Non-insulin-dependent diabetes mellitus	rs35024451	20	33542081	C	0.00024321	0.57247	0.337182	0.4735	0.996168	1.01
E11 Non-insulin-dependent diabetes mellitus	rs733086	20	33571749	G	-0.00024883	0.57319	0.30649	0.2187	0.998489	0.994
E11 Non-insulin-dependent diabetes mellitus	rs2425011	20	33581689	C	-0.00023445	0.57464	0.387949	0.5345	0.999401	0.994
E11 Non-insulin-dependent diabetes mellitus	rs112825656	20	32948518	A	-0.0002954	0.57533	0.193153	0.09288	0.952373	0.993
E11 Non-insulin-dependent diabetes mellitus	rs6088721	20	33706011	C	-0.00023197	0.57631	0.402847	0.6072	0.998457	0.994
E11 Non-insulin-dependent diabetes mellitus	rs4911154	20	32996101	A	-0.00028258	0.5764	0.203464	0.5211	0.998114	0.993
E11 Non-insulin-dependent diabetes mellitus	rs8117042	20	33868913	G	0.00028018	0.57733	0.207065	0.05108	0.993914	1.01
E11 Non-insulin-dependent diabetes mellitus	rs2273805	20	33706575	A	-0.00023122	0.57754	0.40274	0.5826	0.998656	0.995
E11 Non-insulin-dependent diabetes mellitus	rs2065109	20	33707135	C	-0.000231	0.57789	0.402741	0.5826	0.998703	0.995
E11 Non-insulin-dependent diabetes mellitus	rs6120785	20	33580237	G	-0.00023133	0.57975	0.387939	0.5393	0.999441	0.995
E11 Non-insulin-dependent diabetes mellitus	rs2065108	20	33706822	T	-0.00022942	0.58049	0.40272	0.585	0.99876	0.995
E11 Non-insulin-dependent diabetes mellitus	rs6060217	20	33678134	G	-0.00024409	0.58104	0.305453	0.2473	0.997368	0.994
E11 Non-insulin-dependent diabetes mellitus	rs6060135	20	33563936	G	0.0002277	0.58155	0.416996	0.3959	0.997518	1.01
E11 Non-insulin-dependent diabetes mellitus	rs6060133	20	33558011	C	0.00023693	0.58197	0.338133	0.5003	0.997281	1.01
E11 Non-insulin-dependent diabetes mellitus	rs6579204	20	33553677	G	0.00023646	0.58277	0.338001	0.5372	0.996995	1.01
E11 Non-insulin-dependent diabetes mellitus	rs6088726	20	33713055	G	-0.00022768	0.58344	0.402398	0.5537	0.998802	0.995
E11 Non-insulin-dependent diabetes mellitus	rs7263251	20	33554320	C	0.00023559	0.58412	0.338133	0.5101	0.997109	1.01
E11 Non-insulin-dependent diabetes mellitus	rs2425013	20	33582731	T	-0.00022796	0.58531	0.388027	0.4973	0.999144	0.995
E11 Non-insulin-dependent diabetes mellitus	rs6142299	20	33704888	C	-0.00022653	0.58542	0.402794	0.5899	0.998158	0.995
E11 Non-insulin-dependent diabetes mellitus	rs2273636	20	33595300	T	-0.00022781	0.58554	0.388122	0.4706	0.999201	0.995
E11 Non-insulin-dependent diabetes mellitus	rs2425014	20	33583114	C	-0.00024074	0.58605	0.304955	0.3131	0.999231	0.994
E11 Non-insulin-dependent diabetes mellitus	rs927442	20	33708871	G	-0.00022611	0.58606	0.40272	0.5802	0.998185	0.995
E11 Non-insulin-dependent diabetes mellitus	rs2016438	20	33708023	G	-0.00022568	0.58666	0.402705	0.5802	0.998823	0.995
E11 Non-insulin-dependent diabetes mellitus	rs6120827	20	33672123	T	-0.00024018	0.58697	0.304589	0.2605	0.99986	0.994
E11 Non-insulin-dependent diabetes mellitus	rs6142297	20	33687584	G	-0.00022541	0.58737	0.403306	0.6808	0.997299	0.995
E11 Non-insulin-dependent diabetes mellitus	rs17092195	20	33559251	C	0.00023334	0.58776	0.338057	0.4763	0.997183	1.01
E11 Non-insulin-dependent diabetes mellitus	rs6141535	20	33715067	A	-0.0002251	0.58786	0.403071	0.5949	0.997583	0.995
E11 Non-insulin-dependent diabetes mellitus	rs6579219	20	33711391	G	-0.00022454	0.5885	0.402684	0.6022	0.999139	0.995
E11 Non-insulin-dependent diabetes mellitus	rs6058177	20	33676917	C	-0.00023922	0.58852	0.304658	0.2673	0.999413	0.994
E11 Non-insulin-dependent diabetes mellitus	rs1058003	20	33590417	A	-0.00022608	0.58861	0.387825	0.4445	0.99859	0.995
E11 Non-insulin-dependent diabetes mellitus	rs2152918	20	33740209	G	0.000249	0.58931	0.264911	0.5518	0.998484	1.01
E11 Non-insulin-dependent diabetes mellitus	rs6088723	20	33709279	C	-0.00022278	0.59145	0.402672	0.5899	0.998969	0.995
E11 Non-insulin-dependent diabetes mellitus	rs3803937	20	33632687	A	-0.00022416	0.59149	0.388221	0.4707	0.999649	0.995
E11 Non-insulin-dependent diabetes mellitus	rs13041173	20	32542814	G	0.00023026	0.59182	0.342174	0.1842	0.995707	1.01
E11 Non-insulin-dependent diabetes mellitus	rs117075207	20	33074607	G	-0.00045223	0.59205	0.06211	1	genotyped	0.989
E11 Non-insulin-dependent diabetes mellitus	rs4911167	20	33590096	G	-0.00022385	0.5921	0.388153	0.4531	0.999194	0.995
E11 Non-insulin-dependent diabetes mellitus	rs113645189	20	32994363	C	0.00058709	0.59281	0.036796	0.2565	0.965545	1.01
E11 Non-insulin-dependent diabetes mellitus	rs6120838	20	33711624	A	-0.00022151	0.59351	0.402679	0.5973	0.999268	0.995
E11 Non-insulin-dependent diabetes mellitus	rs6088724	20	33712915	T	-0.00022134	0.5938	0.40267	0.5948	0.999298	0.995
E11 Non-insulin-dependent diabetes mellitus	rs6060175	20	33631936	A	-0.00022224	0.59474	0.388085	0.4467	0.999553	0.995
E11 Non-insulin-dependent diabetes mellitus	rs6087677	20	33714805	C	-0.00022086	0.59479	0.403014	0.6047	0.998278	0.995
E11 Non-insulin-dependent diabetes mellitus	rs17092378	20	33736188	T	0.00024496	0.59522	0.264952	0.5316	0.999088	1.01
E11 Non-insulin-dependent diabetes mellitus	rs6088728	20	33713674	C	-0.00022046	0.59526	0.402668	0.5948	0.999368	0.995
E11 Non-insulin-dependent diabetes mellitus	rs6087670	20	33662269	T	-0.00022127	0.59639	0.388128	0.4111	0.999293	0.995
E11 Non-insulin-dependent diabetes mellitus	rs4911169	20	33593834	A	-0.00022106	0.59664	0.388032	0.4297	0.999864	0.995
E11 Non-insulin-dependent diabetes mellitus	rs3746431	20	33593457	C	-0.00022092	0.59687	0.38805	0.4318	0.999881	0.995
E11 Non-insulin-dependent diabetes mellitus	rs4911168	20	33593789	G	-0.0002208	0.59706	0.38805	0.4318	0.999897	0.995
E11 Non-insulin-dependent diabetes mellitus	rs2180847	20	33667763	T	-0.00022069	0.59737	0.388089	0.4131	0.999145	0.995
E11 Non-insulin-dependent diabetes mellitus	rs2145557	20	33667560	G	-0.00022067	0.59742	0.38809	0.4131	0.999144	0.995
E11 Non-insulin-dependent diabetes mellitus	rs138203209	20	34213120	G	0.0007319	0.59753	0.0220709	0.0491	0.993403	1.02
E11 Non-insulin-dependent diabetes mellitus	rs10875491	20	33614145	A	-0.00022052	0.59757	0.388043	0.4467	0.999568	0.995
E11 Non-insulin-dependent diabetes mellitus	rs6088725	20	33713040	A	-0.00021907	0.5977	0.402799	0.535	0.999271	0.995
E11 Non-insulin-dependent diabetes mellitus	rs6087657	20	33564689	A	0.00023244	0.59788	0.308068	0.2808	0.999952	1.01
E11 Non-insulin-dependent diabetes mellitus	rs6060164	20	33616314	G	-0.00021981	0.59873	0.388063	0.4531	0.99964	0.995
E11 Non-insulin-dependent diabetes mellitus	rs6088716	20	33700499	T	-0.00021842	0.59893	0.403316	0.6294	0.997875	0.995
E11 Non-insulin-dependent diabetes mellitus	rs6088676	20	33607426	C	-0.00021968	0.59895	0.38809	0.4531	0.99962	0.995
E11 Non-insulin-dependent diabetes mellitus	rs6087660	20	33616528	C	-0.0002196	0.59909	0.388064	0.451	0.99964	0.995
E11 Non-insulin-dependent diabetes mellitus	rs6119559	20	33601601	G	-0.00023221	0.5992	0.305181	0.2891	0.999539	0.994
E11 Non-insulin-dependent diabetes mellitus	rs10875492	20	33631407	T	-0.00021946	0.59932	0.388066	0.4467	0.999756	0.995
E11 Non-insulin-dependent diabetes mellitus	rs3803938	20	33632600	T	-0.00021946	0.59932	0.388066	0.4467	0.999756	0.995
E11 Non-insulin-dependent diabetes mellitus	rs1358854	20	33633659	A	-0.00021946	0.59933	0.388066	0.4467	0.999756	0.995
E11 Non-insulin-dependent diabetes mellitus	rs1407203	20	33651979	T	-0.00021937	0.59966	0.388495	0.4214	0.998233	0.995
E11 Non-insulin-dependent diabetes mellitus	rs6058166	20	33656710	G	-0.00021921	0.59981	0.388112	0.407	0.999272	0.995
E11 Non-insulin-dependent diabetes mellitus	rs4911465	20	33670856	A	-0.00023188	0.59982	0.305179	0.2394	0.999522	0.994
E11 Non-insulin-dependent diabetes mellitus	rs6088687	20	33624750	A	-0.00021914	0.59985	0.388068	0.4488	0.999759	0.995
E11 Non-insulin-dependent diabetes mellitus	rs6087664	20	33626216	G	-0.00021913	0.59987	0.388068	0.4488	0.999763	0.995
E11 Non-insulin-dependent diabetes mellitus	rs4911460	20	33624330	A	-0.0002191	0.59991	0.388069	0.4488	0.999762	0.995
E11 Non-insulin-dependent diabetes mellitus	rs6060170	20	33624466	G	-0.0002191	0.59991	0.388069	0.4488	0.999762	0.995
E11 Non-insulin-dependent diabetes mellitus	rs6060162	20	33611461	G	-0.00021904	0.60001	0.388067	0.4531	0.999743	0.995
E11 Non-insulin-dependent diabetes mellitus	rs752449	20	33592474	G	-0.00023178	0.60013	0.304665	0.278	0.999529	0.994
E11 Non-insulin-dependent diabetes mellitus	rs2378332	20	33617250	G	-0.00021857	0.6008	0.388073	0.4531	0.999631	0.995
E11 Non-insulin-dependent diabetes mellitus	rs6060205	20	33658869	A	-0.00021855	0.60091	0.388115	0.409	0.999266	0.995
E11 Non-insulin-dependent diabetes mellitus	rs4911463	20	33642737	A	-0.00021822	0.60139	0.388056	0.4402	0.999715	0.995
E11 Non-insulin-dependent diabetes mellitus	rs6060167	20	33620611	A	-0.00021809	0.60159	0.388077	0.4531	0.999753	0.995
E11 Non-insulin-dependent diabetes mellitus	rs6088715	20	33700468	A	-0.00021677	0.60167	0.40333	0.6269	0.997953	0.995
E11 Non-insulin-dependent diabetes mellitus	rs4911462	20	33642732	T	-0.00021798	0.6018	0.388066	0.4402	0.999679	0.995
E11 Non-insulin-dependent diabetes mellitus	rs6087658	20	33606204	G	-0.00021797	0.6018	0.388082	0.4531	0.999736	0.995
E11 Non-insulin-dependent diabetes mellitus	rs6142283	20	33639206	T	-0.00021788	0.60195	0.388053	0.4402	0.999731	0.995
E11 Non-insulin-dependent diabetes mellitus	rs6088692	20	33638588	G	-0.00021785	0.60201	0.388053	0.4402	0.99973	0.995
E11 Non-insulin-dependent diabetes mellitus	rs17310782	20	33565665	T	0.0002297	0.6023	0.307817	0.2806	0.999924	1.01
E11 Non-insulin-dependent diabetes mellitus	rs139382501	20	34343695	T	0.00072354	0.60395	0.0219431	0.1432	0.98704	1.02
E11 Non-insulin-dependent diabetes mellitus	rs1989395	20	33707989	T	-0.00021519	0.60411	0.403123	0.5658	0.999415	0.995
E11 Non-insulin-dependent diabetes mellitus	rs2281626	20	33637606	G	-0.00022865	0.60498	0.304739	0.2744	0.999919	0.995
E11 Non-insulin-dependent diabetes mellitus	rs2425032	20	33855454	C	0.00030422	0.60513	0.140999	0.2986	0.984279	1.01
E11 Non-insulin-dependent diabetes mellitus	rs6060193	20	33648433	T	-0.00022831	0.60543	0.305042	0.2642	0.999811	0.995
E11 Non-insulin-dependent diabetes mellitus	rs2180849	20	33648239	A	-0.00022828	0.60548	0.305042	0.2659	0.999817	0.995
E11 Non-insulin-dependent diabetes mellitus	rs6058192	20	33734261	G	0.00023811	0.60558	0.264904	0.546	0.999165	1.01
E11 Non-insulin-dependent diabetes mellitus	rs1885119	20	33645649	C	-0.00021552	0.60597	0.388036	0.4488	0.999357	0.995
E11 Non-insulin-dependent diabetes mellitus	rs6088693	20	33640342	G	-0.00022795	0.60608	0.304745	0.278	0.99993	0.995
E11 Non-insulin-dependent diabetes mellitus	rs4142034	20	33643256	G	-0.00022778	0.60625	0.305015	0.2676	0.999956	0.995
E11 Non-insulin-dependent diabetes mellitus	rs6060180	20	33638013	G	-0.00022776	0.60638	0.304749	0.278	0.999924	0.995
E11 Non-insulin-dependent diabetes mellitus	rs3746430	20	33593674	C	-0.0002277	0.60638	0.305019	0.2694	0.999912	0.995
E11 Non-insulin-dependent diabetes mellitus	rs6060173	20	33629082	T	-0.00022734	0.60694	0.305017	0.2746	0.999953	0.995
E11 Non-insulin-dependent diabetes mellitus	rs6120810	20	33626249	G	-0.00022688	0.60767	0.30502	0.2746	0.999957	0.995
E11 Non-insulin-dependent diabetes mellitus	rs6142301	20	33712148	C	-0.00021274	0.60815	0.403098	0.5778	0.999902	0.995
E11 Non-insulin-dependent diabetes mellitus	rs2065111	20	33708637	C	-0.00021273	0.60827	0.40305	0.5705	0.999275	0.995
E11 Non-insulin-dependent diabetes mellitus	rs6142302	20	33713251	G	-0.00021233	0.60884	0.403102	0.5754	0.999922	0.995
E11 Non-insulin-dependent diabetes mellitus	rs1998232	20	33601959	G	-0.00022588	0.60926	0.305015	0.2711	0.999944	0.995
E11 Non-insulin-dependent diabetes mellitus	rs2295701	20	33596117	C	-0.00022588	0.60934	0.304748	0.2798	0.999835	0.995
E11 Non-insulin-dependent diabetes mellitus	rs2295887	20	33714187	A	-0.00021203	0.60935	0.403111	0.5851	0.999858	0.995
E11 Non-insulin-dependent diabetes mellitus	rs2378333	20	33708890	G	-0.00021212	0.6094	0.403104	0.5681	0.998642	0.995
E11 Non-insulin-dependent diabetes mellitus	rs2281695	20	33129164	C	0.00025829	0.60961	0.204349	0.5213	0.994631	1.01
E11 Non-insulin-dependent diabetes mellitus	rs2180848	20	33619111	G	-0.00022558	0.60973	0.305031	0.2764	0.999889	0.995
E11 Non-insulin-dependent diabetes mellitus	rs6060154	20	33599601	C	-0.00022556	0.60977	0.305029	0.2694	0.999883	0.995
E11 Non-insulin-dependent diabetes mellitus	rs6060196	20	33653617	G	-0.00022508	0.61055	0.305096	0.2442	0.999697	0.995
E11 Non-insulin-dependent diabetes mellitus	rs2180850	20	33655308	C	-0.00022459	0.61133	0.305072	0.2425	0.999757	0.995
E11 Non-insulin-dependent diabetes mellitus	rs6060201	20	33655813	G	-0.0002245	0.61147	0.305074	0.2409	0.999759	0.995
E11 Non-insulin-dependent diabetes mellitus	rs6142291	20	33664887	C	-0.00022437	0.61176	0.304799	0.2572	0.99987	0.995
E11 Non-insulin-dependent diabetes mellitus	rs6120816	20	33644358	C	-0.00021174	0.61223	0.388047	0.4402	0.99972	0.995
E11 Non-insulin-dependent diabetes mellitus	rs6060218	20	33678636	C	-0.00022443	0.61257	0.3047	0.01631	genotyped	0.995
E11 Non-insulin-dependent diabetes mellitus	rs4911464	20	33659122	A	-0.00022371	0.61272	0.305076	0.2474	0.999769	0.995
E11 Non-insulin-dependent diabetes mellitus	rs1885118	20	33567860	C	-0.00021092	0.61316	0.391009	0.4458	0.999432	0.995
E11 Non-insulin-dependent diabetes mellitus	rs6060204	20	33658423	G	-0.00022346	0.6132	0.304806	0.2556	0.999872	0.995
E11 Non-insulin-dependent diabetes mellitus	rs2057323	20	33656560	T	-0.00022341	0.61328	0.304806	0.2539	0.999881	0.995
E11 Non-insulin-dependent diabetes mellitus	rs2425007	20	33572941	G	-0.00022268	0.6134	0.30812	0.2844	0.999438	0.995
E11 Non-insulin-dependent diabetes mellitus	rs112310554	20	32895324	G	-0.00028091	0.61341	0.173057	0.1555	0.934132	0.993
E11 Non-insulin-dependent diabetes mellitus	rs6058179	20	33689328	G	-0.00022087	0.61343	0.31889	0.2855	0.997507	0.995
E11 Non-insulin-dependent diabetes mellitus	rs6088677	20	33607464	T	-0.00022302	0.61388	0.304751	0.2888	0.999805	0.995
E11 Non-insulin-dependent diabetes mellitus	rs6142272	20	33613371	G	-0.00022212	0.6153	0.304762	0.287	0.999798	0.995
E11 Non-insulin-dependent diabetes mellitus	rs6088659	20	33542605	C	-0.00027583	0.61665	0.171523	0.1214	0.957711	0.993
E11 Non-insulin-dependent diabetes mellitus	rs6058165	20	33640840	T	-0.00022064	0.61765	0.305171	0.259	0.999344	0.995
E11 Non-insulin-dependent diabetes mellitus	rs2077574	20	33571919	T	-0.00021964	0.61831	0.307869	0.2825	0.9997	0.995
E11 Non-insulin-dependent diabetes mellitus	rs6119558	20	33574493	C	-0.00020714	0.61948	0.391161	0.448	0.999558	0.995
E11 Non-insulin-dependent diabetes mellitus	rs147818986	20	32515056	A	0.00026551	0.62126	0.181518	0.8189	0.963695	1.01
E11 Non-insulin-dependent diabetes mellitus	rs2425008	20	33574022	C	-0.00020532	0.62256	0.391195	0.4566	0.999254	0.995
E11 Non-insulin-dependent diabetes mellitus	rs4911166	20	33573377	A	-0.00020475	0.62374	0.390512	0.4627	0.998546	0.995
E11 Non-insulin-dependent diabetes mellitus	rs6060321	20	33833781	A	0.00027963	0.62997	0.143399	0.5014	0.998202	1.01
E11 Non-insulin-dependent diabetes mellitus	rs6060250	20	33704108	C	-0.00020839	0.63365	0.318787	0.2853	0.997587	0.995
E11 Non-insulin-dependent diabetes mellitus	rs6060243	20	33698119	C	-0.00020734	0.63549	0.31898	0.2957	0.996362	0.995
E11 Non-insulin-dependent diabetes mellitus	rs6060156	20	33610145	G	-0.00020908	0.63612	0.305145	0.2873	0.999636	0.995
E11 Non-insulin-dependent diabetes mellitus	rs78594636	20	32588955	G	0.00062965	0.63823	0.02368	0.9113	genotyped	1.02
E11 Non-insulin-dependent diabetes mellitus	rs6088524	20	33139384	C	-0.00020339	0.63838	0.334521	0.3957	0.992866	0.995
E11 Non-insulin-dependent diabetes mellitus	rs6142300	20	33705708	C	-0.00020508	0.63883	0.318769	0.2753	0.99897	0.995
E11 Non-insulin-dependent diabetes mellitus	rs2425018	20	33818766	A	0.00027588	0.63914	0.139573	0.6856	0.994119	1.01
E11 Non-insulin-dependent diabetes mellitus	rs6060151	20	33594226	T	-0.00019626	0.63941	0.3881	0.0148	genotyped	0.995
E11 Non-insulin-dependent diabetes mellitus	rs6088722	20	33706187	C	-0.00020466	0.6395	0.318765	0.2719	0.999103	0.995
E11 Non-insulin-dependent diabetes mellitus	rs6142219	20	33256345	A	-0.00019668	0.64077	0.371191	0.5987	0.998622	0.995
E11 Non-insulin-dependent diabetes mellitus	rs6119593	20	33833729	C	-0.00027468	0.64078	0.1396	0.4477	genotyped	0.993
E11 Non-insulin-dependent diabetes mellitus	rs6142216	20	33256036	A	-0.00019646	0.64114	0.371242	0.6089	0.998678	0.995
E11 Non-insulin-dependent diabetes mellitus	rs4911456	20	33573500	A	-0.00020521	0.64152	0.308205	0.299	0.998642	0.995
E11 Non-insulin-dependent diabetes mellitus	rs6088523	20	33135550	G	-0.00020119	0.64301	0.331973	0.5046	0.990274	0.995
E11 Non-insulin-dependent diabetes mellitus	rs6087663	20	33625526	G	-0.00020544	0.64468	0.3048	0.001121	genotyped	0.995
E11 Non-insulin-dependent diabetes mellitus	rs1040747	20	33145832	G	-0.00019917	0.64525	0.334606	0.4131	0.993414	0.995
E11 Non-insulin-dependent diabetes mellitus	rs1885115	20	33681256	A	-0.00020028	0.64672	0.31899	0.3152	0.998066	0.995
E11 Non-insulin-dependent diabetes mellitus	rs2295885	20	33713963	C	-0.00019941	0.64825	0.318493	0.284	0.998869	0.995
E11 Non-insulin-dependent diabetes mellitus	rs6088564	20	33249444	G	-0.00019221	0.64832	0.37121	0.581	0.999013	0.995
E11 Non-insulin-dependent diabetes mellitus	rs6058186	20	33701835	G	-0.00019919	0.64861	0.318858	0.2997	0.997994	0.995
E11 Non-insulin-dependent diabetes mellitus	rs6058184	20	33701483	C	-0.00019842	0.64987	0.318861	0.2979	0.997996	0.995
E11 Non-insulin-dependent diabetes mellitus	rs2295886	20	33713975	C	-0.00019835	0.65143	0.3195	0.0002578	genotyped	0.995
E11 Non-insulin-dependent diabetes mellitus	rs6141504	20	33281651	G	-0.00018885	0.65546	0.366864	0.953	0.994291	0.996
E11 Non-insulin-dependent diabetes mellitus	rs6088727	20	33713639	A	-0.00018511	0.65638	0.4044	0.03792	genotyped	0.996
E11 Non-insulin-dependent diabetes mellitus	rs13042965	20	32774089	A	0.00023441	0.65987	0.188115	0.8409	0.955265	1.01
E11 Non-insulin-dependent diabetes mellitus	rs6088578	20	33281604	T	-0.00018542	0.66132	0.366866	0.956	0.994297	0.996
E11 Non-insulin-dependent diabetes mellitus	rs6088577	20	33281562	G	-0.00018487	0.66228	0.366775	0.9618	0.994432	0.996
E11 Non-insulin-dependent diabetes mellitus	rs6087598	20	33140934	A	-0.0001891	0.66286	0.332147	0.4972	0.991722	0.996
E11 Non-insulin-dependent diabetes mellitus	rs6142222	20	33281736	T	-0.00018355	0.66454	0.366783	0.9501	0.994436	0.996
E11 Non-insulin-dependent diabetes mellitus	rs6088565	20	33254986	C	-0.00018207	0.66581	0.370956	0.566	0.999149	0.996
E11 Non-insulin-dependent diabetes mellitus	rs6579218	20	33709846	C	-0.0001871	0.67339	0.300862	0.198	0.998788	0.996
E11 Non-insulin-dependent diabetes mellitus	rs6579167	20	33032915	C	0.00020822	0.67592	0.217125	0.1025	0.984017	1
E11 Non-insulin-dependent diabetes mellitus	rs6088552	20	33226491	G	-0.00017594	0.67632	0.371014	0.5835	0.999199	0.996
E11 Non-insulin-dependent diabetes mellitus	rs7269596	20	33229063	C	-0.00017593	0.67634	0.371013	0.581	0.999196	0.996
E11 Non-insulin-dependent diabetes mellitus	rs6142212	20	33226971	T	-0.00017588	0.67643	0.371014	0.581	0.999198	0.996
E11 Non-insulin-dependent diabetes mellitus	rs6142210	20	33223012	T	-0.00017589	0.67647	0.370946	0.5685	0.998928	0.996
E11 Non-insulin-dependent diabetes mellitus	rs6088569	20	33268199	A	-0.00017608	0.67655	0.369964	0.6057	0.997028	0.996
E11 Non-insulin-dependent diabetes mellitus	rs6088525	20	33141272	C	-0.00017986	0.6784	0.332949	0.5247	0.990377	0.996
E11 Non-insulin-dependent diabetes mellitus	rs41290906	20	33645273	A	0.00037648	0.67858	0.0545957	0.7312	0.971673	1.01
E11 Non-insulin-dependent diabetes mellitus	rs6088561	20	33228871	C	-0.000174	0.67967	0.371182	0.5785	0.999223	0.996
E11 Non-insulin-dependent diabetes mellitus	rs6087612	20	33230822	G	-0.00017398	0.6797	0.371182	0.5886	0.999248	0.996
E11 Non-insulin-dependent diabetes mellitus	rs2180485	20	33278442	C	-0.00017379	0.68131	0.367106	0.8915	0.994252	0.996
E11 Non-insulin-dependent diabetes mellitus	rs13042351	20	33238573	A	-0.00017303	0.68133	0.371265	0.5936	0.999411	0.996
E11 Non-insulin-dependent diabetes mellitus	rs7274854	20	33228672	A	-0.00017254	0.68219	0.371258	0.5911	0.999329	0.996
E11 Non-insulin-dependent diabetes mellitus	rs4911158	20	33239512	T	0.00017233	0.6831	0.3717	0.1445	genotyped	1
E11 Non-insulin-dependent diabetes mellitus	rs35416056	20	33538214	G	-0.00035687	0.68341	0.05751	0.3813	genotyped	0.992
E11 Non-insulin-dependent diabetes mellitus	rs6088560	20	33228549	C	-0.00017152	0.68399	0.371164	0.576	0.999178	0.996
E11 Non-insulin-dependent diabetes mellitus	rs6058106	20	33278255	C	-0.00017208	0.68429	0.367105	0.8973	0.994064	0.996
E11 Non-insulin-dependent diabetes mellitus	rs2378250	20	33275529	G	-0.00016999	0.68738	0.370207	0.6812	0.994805	0.996
E11 Non-insulin-dependent diabetes mellitus	rs6060255	20	33717987	C	-0.00017906	0.68807	0.297645	0.1467	0.995038	0.996
E11 Non-insulin-dependent diabetes mellitus	rs2889855	20	33276853	C	-0.00016949	0.68826	0.370119	0.6971	0.994929	0.996
E11 Non-insulin-dependent diabetes mellitus	rs1853056	20	33262058	T	-0.00016676	0.69261	0.370186	0.5656	0.998401	0.996
E11 Non-insulin-dependent diabetes mellitus	rs11167241	20	33250835	T	-0.00016504	0.69563	0.369908	0.563	0.998456	0.996
E11 Non-insulin-dependent diabetes mellitus	rs77042903	20	32668624	C	-0.00020446	0.69585	0.1873	0.1332	genotyped	0.995
E11 Non-insulin-dependent diabetes mellitus	rs6059987	20	33277731	A	-0.00016385	0.69872	0.366745	0.8915	0.994106	0.996
E11 Non-insulin-dependent diabetes mellitus	rs6087615	20	33262984	A	-0.00016303	0.69923	0.369826	0.568	0.998038	0.996
E11 Non-insulin-dependent diabetes mellitus	rs6088771	20	33810692	C	0.00022902	0.70071	0.136797	0.8009	0.985757	1.01
E11 Non-insulin-dependent diabetes mellitus	rs6060163	20	33611738	C	-0.00016888	0.70311	0.302138	0.2122	0.99948	0.996
E11 Non-insulin-dependent diabetes mellitus	rs6088568	20	33265971	C	-0.00016082	0.70314	0.369776	0.563	0.997761	0.996
E11 Non-insulin-dependent diabetes mellitus	rs6060159	20	33610546	G	-0.00016886	0.70315	0.302142	0.2122	0.999419	0.996
E11 Non-insulin-dependent diabetes mellitus	rs1321306	20	33266379	A	-0.00016071	0.70336	0.369784	0.563	0.997629	0.996
E11 Non-insulin-dependent diabetes mellitus	rs6060194	20	33649930	C	-0.00016837	0.70399	0.302236	0.1992	0.999277	0.996
E11 Non-insulin-dependent diabetes mellitus	rs6141503	20	33274469	A	-0.0001599	0.70496	0.370122	0.6495	0.995765	0.996
E11 Non-insulin-dependent diabetes mellitus	rs6088567	20	33263872	T	-0.00015968	0.70512	0.369803	0.5704	0.998005	0.996
E11 Non-insulin-dependent diabetes mellitus	rs1853057	20	33262113	G	-0.00015931	0.70576	0.36987	0.5704	0.997995	0.996
E11 Non-insulin-dependent diabetes mellitus	rs6088570	20	33268295	C	-0.00015927	0.7059	0.370041	0.5931	0.997239	0.996
E11 Non-insulin-dependent diabetes mellitus	rs10211823	20	33808270	C	0.00021882	0.71216	0.137304	0.584	0.991083	1.01
E11 Non-insulin-dependent diabetes mellitus	rs58084442	20	33807521	C	0.00021635	0.71527	0.137311	0.6551	0.99106	1.01
E11 Non-insulin-dependent diabetes mellitus	rs2378251	20	33276750	A	-0.00015377	0.71591	0.370001	0.6596	0.994502	0.996
E11 Non-insulin-dependent diabetes mellitus	rs671988	20	33837414	T	0.00021471	0.71619	0.137898	0.5955	0.996407	1.01
E11 Non-insulin-dependent diabetes mellitus	rs2425016	20	33807249	G	0.00021503	0.71695	0.137293	0.6448	0.990949	1.01
E11 Non-insulin-dependent diabetes mellitus	rs2247828	20	33839939	G	0.00021252	0.71887	0.138309	0.5047	0.994236	1.01
E11 Non-insulin-dependent diabetes mellitus	rs6087614	20	33262874	C	-0.00015163	0.71936	0.36957	0.5531	0.998515	0.996
E11 Non-insulin-dependent diabetes mellitus	rs34106705	20	32537166	T	-0.00015589	0.72217	0.3156	0.8066	genotyped	0.996
E11 Non-insulin-dependent diabetes mellitus	rs4911437	20	33266149	T	-0.00014997	0.72235	0.369524	0.5482	0.998199	0.996
E11 Non-insulin-dependent diabetes mellitus	rs6088575	20	33273403	G	-0.00014379	0.73357	0.369754	0.5803	0.995214	0.997
E11 Non-insulin-dependent diabetes mellitus	rs1998233	20	33657126	A	-0.00015107	0.73389	0.3069	4.612e-07	genotyped	0.996
E11 Non-insulin-dependent diabetes mellitus	rs2378334	20	33716739	T	-0.00015116	0.73478	0.302518	0.1713	0.983983	0.996
E11 Non-insulin-dependent diabetes mellitus	rs6579129	20	32533524	T	0.00014665	0.73772	0.315438	0.1288	0.997147	1
E11 Non-insulin-dependent diabetes mellitus	rs2425050	20	33879478	A	0.00016327	0.73788	0.2247	0.4226	genotyped	1
E11 Non-insulin-dependent diabetes mellitus	rs117518577	20	32751459	A	-0.00027459	0.73844	0.0679263	0.9682	0.966569	0.993
E11 Non-insulin-dependent diabetes mellitus	rs6141482	20	33156523	C	-0.0001431	0.74064	0.335141	0.3656	0.99481	0.997
E11 Non-insulin-dependent diabetes mellitus	rs1535466	20	33718706	A	-0.00014563	0.74411	0.297478	0.1616	0.99462	0.997
E11 Non-insulin-dependent diabetes mellitus	rs6141486	20	33178132	A	-0.00014103	0.74413	0.335557	0.3865	0.994682	0.997
E11 Non-insulin-dependent diabetes mellitus	rs6088529	20	33170752	A	-0.00013358	0.75731	0.335122	0.3556	0.994958	0.997
E11 Non-insulin-dependent diabetes mellitus	rs6060253	20	33716263	G	-0.00012978	0.77096	0.303711	0.1648	0.983712	0.997
E11 Non-insulin-dependent diabetes mellitus	rs6060313	20	33810869	T	0.00016958	0.77491	0.137186	0.6238	0.992295	1
E11 Non-insulin-dependent diabetes mellitus	rs6088520	20	33132364	C	-0.00011435	0.77955	0.4733	0.05245	genotyped	0.997
E11 Non-insulin-dependent diabetes mellitus	rs6088547	20	33212947	A	-0.00010592	0.80578	0.337024	0.4337	0.998357	0.997
E11 Non-insulin-dependent diabetes mellitus	rs8116198	20	33114201	A	-0.00014424	0.80704	0.1387	0.09649	genotyped	0.997
E11 Non-insulin-dependent diabetes mellitus	rs6088542	20	33204410	T	-0.00010318	0.81072	0.337084	0.436	0.998624	0.998
E11 Non-insulin-dependent diabetes mellitus	rs6579178	20	33203552	A	-0.00010221	0.81247	0.337076	0.436	0.99827	0.998
E11 Non-insulin-dependent diabetes mellitus	rs6088543	20	33206191	T	-0.00010208	0.81271	0.337149	0.436	0.998476	0.998
E11 Non-insulin-dependent diabetes mellitus	rs1001425	20	33153150	C	-0.00010246	0.81324	0.351688	0.2073	0.964593	0.998
E11 Non-insulin-dependent diabetes mellitus	rs6087609	20	33214541	C	-0.00010161	0.81354	0.337112	0.4315	0.998782	0.998
E11 Non-insulin-dependent diabetes mellitus	rs6088548	20	33215745	C	-0.0001013	0.8141	0.337108	0.4382	0.99865	0.998
E11 Non-insulin-dependent diabetes mellitus	rs34502964	20	33218638	A	0.0001141	0.81808	0.219112	0.1682	0.985183	1
E11 Non-insulin-dependent diabetes mellitus	rs6141493	20	33218649	G	-9.4093e-05	0.82711	0.336962	0.427	0.998513	0.998
E11 Non-insulin-dependent diabetes mellitus	rs17092385	20	33739254	A	-0.00014051	0.82999	0.1138	0.09597	0.958066	0.997
E11 Non-insulin-dependent diabetes mellitus	rs11904852	20	33216764	A	-9.0926e-05	0.83289	0.336671	0.4679	0.998417	0.998
E11 Non-insulin-dependent diabetes mellitus	rs6087571	20	32912091	G	0.00012683	0.83301	0.136428	0.2923	0.972198	1
E11 Non-insulin-dependent diabetes mellitus	rs6087606	20	33194426	C	-8.7321e-05	0.83924	0.338843	0.3626	0.997924	0.998
E11 Non-insulin-dependent diabetes mellitus	rs1415772	20	33765583	G	-9.3297e-05	0.83954	0.267443	0.7377	0.995021	0.998
E11 Non-insulin-dependent diabetes mellitus	rs721613	20	33193428	G	-8.6318e-05	0.84107	0.33877	0.3566	0.997702	0.998
E11 Non-insulin-dependent diabetes mellitus	rs78836409	20	32903004	G	-0.00017353	0.84212	0.05801	0.8645	genotyped	0.996
E11 Non-insulin-dependent diabetes mellitus	rs7267608	20	33882791	C	-9.6346e-05	0.8425	0.228609	0.03236	0.994823	0.998
E11 Non-insulin-dependent diabetes mellitus	rs6142202	20	33194798	T	-8.4272e-05	0.84482	0.338475	0.3975	0.997733	0.998
E11 Non-insulin-dependent diabetes mellitus	rs4911433	20	33190379	T	-8.4238e-05	0.84495	0.338578	0.3644	0.996622	0.998
E11 Non-insulin-dependent diabetes mellitus	rs6142201	20	33191752	T	-8.3781e-05	0.84571	0.338589	0.3787	0.997572	0.998
E11 Non-insulin-dependent diabetes mellitus	rs6088537	20	33195608	T	-8.3772e-05	0.84573	0.338469	0.3954	0.997763	0.998
E11 Non-insulin-dependent diabetes mellitus	rs6142208	20	33220263	T	-8.2382e-05	0.84836	0.336426	0.4424	0.999849	0.998
E11 Non-insulin-dependent diabetes mellitus	rs2425021	20	33829778	C	0.00010827	0.84869	0.151979	0.9422	0.996079	1
E11 Non-insulin-dependent diabetes mellitus	rs74778497	20	32581570	G	-0.00015116	0.84923	0.0706	0.563	genotyped	0.996
E11 Non-insulin-dependent diabetes mellitus	rs7264012	20	33191027	C	-8.0716e-05	0.85127	0.338674	0.3747	0.99775	0.998
E11 Non-insulin-dependent diabetes mellitus	rs55793516	20	33190165	T	-7.5493e-05	0.86088	0.338615	0.3684	0.996491	0.998
E11 Non-insulin-dependent diabetes mellitus	rs147642147	20	32707700	T	-0.00013986	0.86231	0.0697598	0.5491	0.981576	0.997
E11 Non-insulin-dependent diabetes mellitus	rs2425017	20	33817638	C	9.3617e-05	0.87051	0.148319	0.8342	0.992212	1
E11 Non-insulin-dependent diabetes mellitus	rs632688	20	33778287	C	7.1562e-05	0.87658	0.267398	0.8277	0.994685	1
E11 Non-insulin-dependent diabetes mellitus	rs6088532	20	33178782	G	-6.4913e-05	0.88033	0.338444	0.36	0.994994	0.998
E11 Non-insulin-dependent diabetes mellitus	rs6142209	20	33220984	T	6.3163e-05	0.88386	0.3366	0.07358	genotyped	1
E11 Non-insulin-dependent diabetes mellitus	rs41310801	20	33584310	A	0.00015603	0.8905	0.0344632	0.1747	0.962314	1
E11 Non-insulin-dependent diabetes mellitus	rs41312284	20	33584304	A	0.00015544	0.89094	0.0344549	0.1747	0.962152	1
E11 Non-insulin-dependent diabetes mellitus	rs17092209	20	33592721	A	-7.9864e-05	0.89717	0.1242	0.1509	genotyped	0.998
E11 Non-insulin-dependent diabetes mellitus	rs6088619	20	33411871	G	-6.0723e-05	0.91895	0.136756	0.4192	0.985849	0.999
E11 Non-insulin-dependent diabetes mellitus	rs2378254	20	33283649	A	4.3391e-05	0.91909	0.356859	0.7912	0.98736	1
E11 Non-insulin-dependent diabetes mellitus	rs6088519	20	33132191	C	3.4741e-05	0.93945	0.2792	1.056e-11	genotyped	1
E11 Non-insulin-dependent diabetes mellitus	rs74408725	20	32665084	C	-5.0811e-05	0.949	0.07068	0.8272	genotyped	0.999
E11 Non-insulin-dependent diabetes mellitus	rs1015363	20	32738335	A	-2.2219e-05	0.95671	0.465308	0.2703	0.993051	0.999
E11 Non-insulin-dependent diabetes mellitus	rs79027916	20	32654818	C	1.1313e-05	0.98495	0.133	0.4199	genotyped	1
E11 Non-insulin-dependent diabetes mellitus	rs75632179	20	33611208	G	-1.4117e-05	0.99009	0.0344476	0.2025	0.956544	1
E11 Non-insulin-dependent diabetes mellitus	rs79078695	20	32654817	G	-2.2013e-06	0.99707	0.132786	0.572	0.999401	1

## Sheet: T2D-GGT7
Trait	Variant	Chromosome	Position	Eff. allele	beta	pv	MAF	HWE	imp. score	ORbeta*
type 2 diabetes	rs73099541	20	33731022	T	-0.0011068	0.012246	0.03645	0.1842	genotyped	0.84
type 2 diabetes	rs73095129	20	33583717	A	0.0011296	0.012883	0.0353485	0.1437	0.97139	1.19
type 2 diabetes	rs4911137	20	32535463	T	0.00037751	0.0246	0.41859	0.9608	0.998353	1.06
type 2 diabetes	rs6142051	20	32533018	C	0.00037158	0.027071	0.4168	0.393	genotyped	1.06
type 2 diabetes	rs6142055	20	32539806	C	0.00037194	0.027225	0.414714	0.4329	0.996318	1.06
type 2 diabetes	rs6142046	20	32514061	T	0.00036874	0.028694	0.420162	0.8968	0.989912	1.06
type 2 diabetes	rs4012234	20	32553047	G	0.00036808	0.02882	0.415399	0.5332	0.99601	1.06
type 2 diabetes	rs4911382	20	32553095	T	0.00036803	0.028843	0.415386	0.5379	0.996055	1.06
type 2 diabetes	rs6142050	20	32527128	A	0.00036247	0.03113	0.419765	0.9218	0.994708	1.06
type 2 diabetes	rs6141431	20	32540314	A	0.0003623	0.031257	0.418231	0.7545	0.995324	1.06
type 2 diabetes	rs6059577	20	32527686	C	0.00036113	0.03175	0.41969	0.9163	0.994879	1.06
type 2 diabetes	rs6059579	20	32527865	G	0.00036111	0.03212	0.417073	0.5002	0.993341	1.06
type 2 diabetes	rs6059580	20	32527873	C	0.00036013	0.032594	0.417018	0.4913	0.993554	1.06
type 2 diabetes	rs4911136	20	32525872	T	0.00035902	0.032798	0.419656	0.8526	0.994352	1.06
type 2 diabetes	rs4911403	20	32672949	A	0.00035414	0.03463	0.435592	0.188	0.994766	1.06
type 2 diabetes	rs6142067	20	32556572	T	0.00035467	0.035299	0.413546	0.4596	0.995335	1.06
type 2 diabetes	rs9753679	20	32540860	A	0.00035412	0.0353	0.418024	0.7331	0.99551	1.06
type 2 diabetes	rs9753690	20	32540801	G	0.00035414	0.035324	0.417655	0.6886	0.995086	1.06
type 2 diabetes	rs7263727	20	32540939	C	0.00035383	0.035448	0.417785	0.6809	0.996022	1.06
type 2 diabetes	rs6142061	20	32548335	G	0.00035348	0.035635	0.417957	0.6402	0.996008	1.06
type 2 diabetes	rs6142064	20	32549845	T	0.00035339	0.035693	0.417785	0.663	0.995956	1.06
type 2 diabetes	rs6142062	20	32548512	G	0.00035325	0.035755	0.417949	0.6402	0.996041	1.06
type 2 diabetes	rs4911138	20	32547699	T	0.00035309	0.035834	0.417954	0.6452	0.996053	1.06
type 2 diabetes	rs4243974	20	32547868	C	0.00035308	0.035843	0.417953	0.6427	0.99605	1.06
type 2 diabetes	rs6141433	20	32548862	C	0.00035304	0.035866	0.417953	0.6327	0.996035	1.06
type 2 diabetes	rs117346604	20	33496628	C	0.0010271	0.035928	0.0299279	0.2336	0.980983	1.18
type 2 diabetes	rs6141432	20	32548597	G	0.00035264	0.036094	0.417923	0.6377	0.995888	1.06
type 2 diabetes	rs6142056	20	32541155	C	0.00035242	0.036181	0.417723	0.7357	0.996027	1.06
type 2 diabetes	rs4911380	20	32546224	T	0.0003516	0.036615	0.417869	0.6964	0.996116	1.06
type 2 diabetes	rs4911381	20	32550345	C	0.00035124	0.036821	0.417892	0.6477	0.996052	1.06
type 2 diabetes	rs6141435	20	32551279	A	0.00035116	0.036861	0.417893	0.6452	0.996049	1.06
type 2 diabetes	rs6141434	20	32551247	G	0.00035116	0.036862	0.417893	0.6452	0.996051	1.06
type 2 diabetes	rs4911139	20	32551535	A	0.00035063	0.037141	0.417852	0.6477	0.996061	1.06
type 2 diabetes	rs2050208	20	32543573	G	0.00035032	0.037313	0.417814	0.668	0.996074	1.06
type 2 diabetes	rs6142058	20	32542801	G	0.00035024	0.037353	0.417806	0.668	0.996116	1.06
type 2 diabetes	rs7270891	20	32542116	A	0.00035025	0.037353	0.41783	0.668	0.996043	1.06
type 2 diabetes	rs6142060	20	32544846	C	0.00035026	0.037359	0.417827	0.6502	0.995992	1.06
type 2 diabetes	rs6141436	20	32554571	A	0.00034969	0.037912	0.414213	0.4877	0.996146	1.06
type 2 diabetes	rs6142068	20	32557172	C	0.0003479	0.039213	0.411391	0.4785	0.994431	1.06
type 2 diabetes	rs1883707	20	32552587	T	0.00034704	0.039218	0.417962	0.6528	0.99515	1.06
type 2 diabetes	rs4911384	20	32555807	T	0.00034511	0.040508	0.414209	0.501	0.996113	1.06
type 2 diabetes	rs2268086	20	32648738	G	0.00034237	0.042365	0.408803	0.2026	0.999708	1.06
type 2 diabetes	rs2300209	20	32643100	C	0.00034127	0.042945	0.409964	0.1861	0.999786	1.06
type 2 diabetes	rs117344844	20	33505849	G	0.00097968	0.045028	0.0301191	0.2122	0.977969	1.17
type 2 diabetes	rs6141437	20	32558855	T	0.00033559	0.046485	0.411381	0.3205	0.998422	1.05
type 2 diabetes	rs6142069	20	32560542	A	0.00033554	0.046514	0.411386	0.3205	0.998459	1.05
type 2 diabetes	rs4911399	20	32623418	A	0.00033318	0.048121	0.409451	0.2416	0.999839	1.05
type 2 diabetes	rs4911145	20	32615223	G	0.00033316	0.048175	0.409363	0.2444	0.999648	1.05
type 2 diabetes	rs4911402	20	32667645	G	0.00033318	0.048189	0.409167	0.2559	0.999565	1.05
type 2 diabetes	rs1054534	20	32605327	C	0.0003328	0.048396	0.409321	0.2473	0.999877	1.05
type 2 diabetes	rs4911395	20	32579901	G	0.00033251	0.048454	0.411381	0.3069	0.999326	1.05
type 2 diabetes	rs4911396	20	32579945	G	0.00033242	0.048509	0.411369	0.3137	0.999328	1.05
type 2 diabetes	rs142023093	20	33475850	A	0.00096854	0.048664	0.0297447	0.2832	0.980407	1.16
type 2 diabetes	rs4911404	20	32673037	A	0.00033138	0.049424	0.409676	0.2318	0.998921	1.05
type 2 diabetes	rs6141444	20	32607610	A	0.00032853	0.051345	0.409358	0.243	0.999836	1.05
type 2 diabetes	rs4911148	20	32668244	G	0.00032834	0.051592	0.409913	0.3113	0.998397	1.05
type 2 diabetes	rs11696338	20	32687611	C	0.00032882	0.051678	0.4096	0.1513	genotyped	1.05
type 2 diabetes	rs2268079	20	32596750	G	0.00032755	0.051974	0.410488	0.2267	0.999713	1.05
type 2 diabetes	rs761233	20	32568886	G	0.0003276	0.052035	0.411719	0.3102	0.997625	1.05
type 2 diabetes	rs68051854	20	32701956	C	0.00031641	0.059161	0.427722	0.2347	0.998861	1.05
type 2 diabetes	rs2223553	20	32709444	A	0.00031637	0.059302	0.427747	0.1374	0.998173	1.05
type 2 diabetes	rs932388	20	32657378	T	0.00031843	0.059481	0.4073	0.1053	genotyped	1.05
type 2 diabetes	rs6142101	20	32697845	A	0.0003156	0.061223	0.409884	0.2171	0.999534	1.05
type 2 diabetes	rs2268084	20	32631388	C	0.0002897	0.080798	0.482298	0.5117	0.999306	1.05
type 2 diabetes	rs6142071	20	32561487	T	0.00028618	0.084578	0.484106	0.6397	0.998394	1.05
type 2 diabetes	rs11697165	20	32573284	T	0.00028338	0.087573	0.484085	0.6178	0.999214	1.05
type 2 diabetes	rs6142078	20	32573900	T	0.00028307	0.087944	0.484112	0.6178	0.99901	1.05
type 2 diabetes	rs2268082	20	32603927	A	0.00028279	0.088693	0.4829	0.666	genotyped	1.05
type 2 diabetes	rs6059583	20	32532114	G	0.00029033	0.093588	0.355346	0.4068	0.999286	1.05
type 2 diabetes	rs761234	20	32568885	T	0.00027772	0.094316	0.484382	0.6274	0.997746	1.04
type 2 diabetes	rs9679981	20	32514914	G	0.0002895	0.095689	0.356091	0.3315	0.990975	1.05
type 2 diabetes	rs6059554	20	32514092	A	0.00028949	0.095727	0.356086	0.3409	0.990842	1.05
type 2 diabetes	rs6059555	20	32514324	C	0.00028944	0.095761	0.356094	0.3428	0.990913	1.05
type 2 diabetes	rs6120440	20	32517585	A	0.00028705	0.098456	0.356126	0.3795	0.990441	1.05
type 2 diabetes	rs6059558	20	32516830	C	0.00028534	0.10051	0.356073	0.3636	0.99102	1.05
type 2 diabetes	rs725478	20	32518354	A	0.00028516	0.10068	0.356041	0.3674	0.99166	1.05
type 2 diabetes	rs6057945	20	32517180	T	0.00028489	0.10111	0.356293	0.3675	0.990348	1.05
type 2 diabetes	rs4911375	20	32516022	A	0.00028462	0.10177	0.355724	0.3875	0.988419	1.05
type 2 diabetes	rs761238	20	32519988	T	0.00028296	0.10325	0.356125	0.3876	0.99169	1.05
type 2 diabetes	rs4911374	20	32516001	C	0.00028303	0.1037	0.355659	0.3694	0.989477	1.05
type 2 diabetes	rs761236	20	32520051	G	0.00027929	0.10784	0.355755	0.3915	0.992136	1.04
type 2 diabetes	rs973409	20	32536364	C	0.00027676	0.11096	0.3545	0.02123	genotyped	1.04
type 2 diabetes	rs6142096	20	32686658	A	0.00026232	0.11407	0.481343	0.5865	0.998021	1.04
type 2 diabetes	rs10048849	20	33419680	T	0.00026454	0.12052	0.384887	0.7892	0.995916	1.04
type 2 diabetes	rs3765435	20	32678043	A	0.00025566	0.12344	0.482172	0.575	0.99837	1.04
type 2 diabetes	rs6142100	20	32697539	G	0.00025564	0.12344	0.482128	0.5821	0.998776	1.04
type 2 diabetes	rs6059581	20	32528388	A	0.00026373	0.12806	0.356578	0.4074	0.9952	1.04
type 2 diabetes	rs6057957	20	32549858	G	0.00026363	0.12851	0.354499	0.3886	0.996782	1.04
type 2 diabetes	rs6088355	20	32545887	G	0.00026219	0.13046	0.354991	0.3848	0.997011	1.04
type 2 diabetes	rs55845370	20	33433629	G	0.00026236	0.13121	0.355042	0.4482	0.988141	1.04
type 2 diabetes	rs35591645	20	33682942	T	-0.0006394	0.13265	0.0411189	0.2031	0.957763	0.904
type 2 diabetes	rs6059575	20	32523195	C	0.0002499	0.13395	0.460139	0.2189	0.990289	1.04
type 2 diabetes	rs6059574	20	32523172	G	0.00025969	0.13399	0.362664	0.6167	0.986197	1.04
type 2 diabetes	rs6059587	20	32542926	C	0.00025948	0.13451	0.354877	0.3868	0.997012	1.04
type 2 diabetes	rs1319363	20	32541876	A	0.00025931	0.13476	0.355027	0.3608	0.996747	1.04
type 2 diabetes	rs4911383	20	32555779	G	0.00025935	0.13574	0.350738	0.2687	0.997044	1.04
type 2 diabetes	rs147642147	20	32707700	T	-0.00048935	0.13587	0.0697598	0.5491	0.981576	0.926
type 2 diabetes	rs6059586	20	32540501	A	0.00025679	0.13851	0.35549	0.3891	0.99555	1.04
type 2 diabetes	rs2236270	20	33523155	T	0.00025134	0.14339	0.381959	0.7802	0.982611	1.04
type 2 diabetes	rs6120463	20	32556389	C	0.00025434	0.14348	0.350774	0.2304	0.997029	1.04
type 2 diabetes	rs2377955	20	32525370	G	0.00025037	0.14909	0.355453	0.5389	0.993499	1.04
type 2 diabetes	rs73106997	20	33375138	T	0.00032757	0.15052	0.166712	0.04442	0.947745	1.05
type 2 diabetes	rs6088360	20	32557189	G	0.00024988	0.15062	0.350619	0.1876	0.997407	1.04
type 2 diabetes	rs6059596	20	32557119	T	0.00024945	0.15128	0.350786	0.2005	0.997354	1.04
type 2 diabetes	rs4911385	20	32558593	A	0.00024915	0.15154	0.350822	0.2074	0.998523	1.04
type 2 diabetes	rs4911390	20	32565207	C	0.00024755	0.15426	0.350689	0.2046	0.998417	1.04
type 2 diabetes	rs2377957	20	32554473	G	0.00024763	0.15427	0.351286	0.2468	0.995573	1.04
type 2 diabetes	rs4911394	20	32577327	T	0.00024718	0.15463	0.350874	0.2129	0.999429	1.04
type 2 diabetes	rs6059651	20	32645052	C	0.00024733	0.15472	0.349578	0.1245	0.999833	1.04
type 2 diabetes	rs2284387	20	32644588	A	0.00024715	0.15502	0.349581	0.1255	0.999866	1.04
type 2 diabetes	rs909884	20	32646063	T	0.00024701	0.15528	0.349535	0.134	0.999796	1.04
type 2 diabetes	rs6088659	20	33542605	C	-0.0003181	0.15593	0.171523	0.1214	0.957711	0.951
type 2 diabetes	rs4911389	20	32565041	G	0.00024644	0.15612	0.350701	0.2087	0.99837	1.04
type 2 diabetes	rs2268088	20	32649064	T	0.00024644	0.15629	0.349458	0.1216	0.999641	1.04
type 2 diabetes	rs4911146	20	32640047	G	0.00024619	0.15664	0.349583	0.143	0.999697	1.04
type 2 diabetes	rs11907546	20	32719797	T	0.00024286	0.15719	0.374754	0.02726	0.994864	1.04
type 2 diabetes	rs6142059	20	32544327	C	0.0002347	0.15723	0.492499	0.4725	0.995693	1.04
type 2 diabetes	rs6057961	20	32573811	G	0.00024529	0.15784	0.35081	0.217	0.999353	1.04
type 2 diabetes	rs6059649	20	32643877	T	0.00024548	0.15786	0.34951	0.1291	0.999783	1.04
type 2 diabetes	rs4911401	20	32654562	A	0.00024311	0.16178	0.349993	0.1504	0.999675	1.04
type 2 diabetes	rs6087631	20	33403509	C	0.00023749	0.16229	0.386874	0.8799	0.999174	1.04
type 2 diabetes	rs35393655	20	33452915	A	0.00023799	0.1629	0.38178	0.845	0.996812	1.04
type 2 diabetes	rs6088620	20	33412022	G	0.00023738	0.16298	0.386712	0.897	0.996966	1.04
type 2 diabetes	rs6142206	20	33212055	G	-0.00023442	0.16299	0.4219	0.06926	genotyped	0.964
type 2 diabetes	rs12626122	20	33425800	G	0.00023848	0.16413	0.374328	0.838	0.994259	1.04
type 2 diabetes	rs2284377	20	32586682	C	0.00024162	0.16434	0.349952	0.1693	0.999964	1.04
type 2 diabetes	rs2300206	20	32589808	C	0.0002412	0.16506	0.349955	0.1705	0.999959	1.04
type 2 diabetes	rs7267608	20	33882791	C	-0.0002739	0.16506	0.228609	0.03236	0.994823	0.958
type 2 diabetes	rs6120750	20	33465289	C	0.00023654	0.16515	0.381884	0.9424	0.998546	1.04
type 2 diabetes	rs2284388	20	32655741	G	0.00024101	0.1655	0.349836	0.1493	0.999692	1.04
type 2 diabetes	rs6088617	20	33408036	A	0.00023556	0.16598	0.386823	0.8998	0.998065	1.04
type 2 diabetes	rs1007090	20	32582871	C	0.00024034	0.16668	0.349841	0.1788	0.999621	1.04
type 2 diabetes	rs2284379	20	32594642	C	0.00024018	0.16686	0.349955	0.1717	0.999907	1.04
type 2 diabetes	rs2268080	20	32597716	A	0.00023994	0.1673	0.35	0.1682	0.999804	1.04
type 2 diabetes	rs11698977	20	33449691	T	0.00023541	0.16736	0.381834	0.9394	0.997502	1.04
type 2 diabetes	rs6059639	20	32619136	G	0.0002394	0.1683	0.350108	0.1705	0.999516	1.04
type 2 diabetes	rs6120747	20	33449769	C	0.00023445	0.16941	0.380759	0.8223	0.997148	1.04
type 2 diabetes	rs11696546	20	33452999	G	0.00023404	0.16981	0.382059	0.8907	0.997365	1.04
type 2 diabetes	rs2235597	20	32665614	T	0.00023858	0.16984	0.34989	0.1623	0.999098	1.04
type 2 diabetes	rs7262834	20	33400913	T	0.00023307	0.1702	0.388572	0.7518	0.997725	1.04
type 2 diabetes	rs6087632	20	33407704	C	0.00023292	0.17074	0.387017	0.9141	0.998141	1.04
type 2 diabetes	rs13041014	20	32517241	A	0.00022821	0.17147	0.462964	0.5632	0.988902	1.04
type 2 diabetes	rs1555075	20	32610401	C	0.00023749	0.17167	0.349958	0.174	0.999863	1.04
type 2 diabetes	rs4911143	20	32607854	G	0.0002374	0.17182	0.349972	0.1717	0.999954	1.04
type 2 diabetes	rs2056990	20	32623464	T	0.0002372	0.17215	0.350126	0.1637	0.999684	1.04
type 2 diabetes	rs4911376	20	32516028	A	0.00022801	0.1722	0.463413	0.5725	0.987225	1.04
type 2 diabetes	rs4911397	20	32607846	G	0.0002368	0.17294	0.349943	0.174	0.99987	1.04
type 2 diabetes	rs4911147	20	32667607	A	0.00023668	0.17325	0.349809	0.1657	0.999307	1.04
type 2 diabetes	rs8123521	20	32668885	C	0.0002363	0.17395	0.3498	0.1646	0.99948	1.04
type 2 diabetes	rs8119937	20	32645551	T	0.00023585	0.17461	0.35021	0.1402	0.999805	1.04
type 2 diabetes	rs6120724	20	33366470	T	0.00023113	0.17473	0.386202	0.9026	0.995593	1.04
type 2 diabetes	rs6119530	20	33403930	G	0.00022989	0.17624	0.386633	0.8884	0.999076	1.04
type 2 diabetes	rs3787230	20	32640272	G	0.00023383	0.17832	0.350386	0.1443	0.999489	1.04
type 2 diabetes	rs4911392	20	32570518	C	0.0002311	0.18312	0.351491	0.2404	0.999042	1.04
type 2 diabetes	rs4911393	20	32570926	G	0.0002311	0.18312	0.351491	0.2404	0.999042	1.04
type 2 diabetes	rs28542147	20	33376323	A	0.00022604	0.18363	0.386971	0.8827	0.99831	1.04
type 2 diabetes	rs2284389	20	32656841	G	0.00023089	0.18375	0.350555	0.1684	0.999692	1.04
type 2 diabetes	rs55753039	20	33394940	T	0.00022559	0.18441	0.388619	0.7572	0.99717	1.04
type 2 diabetes	rs13041059	20	33366641	G	0.0002255	0.18469	0.386974	0.8855	0.998283	1.04
type 2 diabetes	rs74408725	20	32665084	C	0.00042839	0.18508	0.07068	0.8272	genotyped	1.07
type 2 diabetes	rs6088607	20	33378733	T	0.00022529	0.18512	0.38699	0.8969	0.998193	1.04
type 2 diabetes	rs6119522	20	33366481	A	0.00022523	0.18525	0.387045	0.8827	0.998036	1.04
type 2 diabetes	rs6120727	20	33374102	C	0.00022517	0.18534	0.38697	0.8941	0.998299	1.04
type 2 diabetes	rs7267403	20	33372856	A	0.00022507	0.18552	0.386975	0.8855	0.998334	1.04
type 2 diabetes	rs6119524	20	33373813	T	0.00022506	0.18553	0.386977	0.8827	0.998341	1.04
type 2 diabetes	rs6120723	20	33364655	T	0.00022479	0.18608	0.386979	0.8798	0.998302	1.04
type 2 diabetes	rs6120487	20	32622608	G	0.00022944	0.18642	0.350749	0.1804	0.999855	1.04
type 2 diabetes	rs1883524	20	32626107	A	0.00022925	0.18679	0.350758	0.1817	0.999751	1.04
type 2 diabetes	rs4911405	20	32674967	T	0.00022897	0.18872	0.348601	0.1952	0.995709	1.04
type 2 diabetes	rs2300204	20	32588773	A	0.00022715	0.19088	0.35063	0.1865	0.999696	1.04
type 2 diabetes	rs1055857	20	32613873	G	0.00022621	0.19274	0.350626	0.1865	0.999712	1.04
type 2 diabetes	rs2300205	20	32589780	T	0.00022584	0.19345	0.350766	0.1756	0.999619	1.04
type 2 diabetes	rs2268089	20	32667298	C	0.00022578	0.19373	0.350463	0.1888	0.99921	1.04
type 2 diabetes	rs6087639	20	33443866	A	0.00022121	0.19414	0.382081	0.8566	0.998738	1.04
type 2 diabetes	rs6087626	20	33347328	T	0.00022034	0.1949	0.387214	0.9112	0.998082	1.04
type 2 diabetes	rs6119447	20	32668576	G	0.00022498	0.19533	0.350471	0.1827	0.999167	1.04
type 2 diabetes	rs2180276	20	33360785	A	0.00022015	0.19542	0.387065	0.9083	0.997766	1.04
type 2 diabetes	rs4911407	20	32683565	A	0.00022445	0.19642	0.350185	0.1741	0.9995	1.04
type 2 diabetes	rs6120730	20	33385102	C	0.00021933	0.19706	0.386738	0.894	0.998266	1.04
type 2 diabetes	rs6119516	20	33328024	T	0.000219	0.19755	0.387586	0.8488	0.998077	1.04
type 2 diabetes	rs4911408	20	32700566	A	0.00022363	0.19847	0.34978	0.1811	0.99832	1.04
type 2 diabetes	rs2425050	20	33879478	A	0.00025511	0.19873	0.2247	0.4226	genotyped	1.04
type 2 diabetes	rs6087623	20	33317662	G	0.0002182	0.19923	0.387439	0.8629	0.998042	1.03
type 2 diabetes	rs6058111	20	33310999	C	0.00021809	0.19945	0.38763	0.8544	0.997899	1.03
type 2 diabetes	rs6088624	20	33436852	A	0.00021861	0.19948	0.381806	0.8594	0.998869	1.04
type 2 diabetes	rs6120705	20	33313740	C	0.00021797	0.19971	0.387446	0.86	0.998003	1.03
type 2 diabetes	rs13040449	20	33358901	A	0.00021803	0.19989	0.386466	0.8627	0.997572	1.03
type 2 diabetes	rs6088590	20	33313566	C	0.00021738	0.20092	0.387476	0.8544	0.997764	1.03
type 2 diabetes	rs6120708	20	33335526	A	0.00021733	0.20105	0.387849	0.8827	0.99764	1.03
type 2 diabetes	rs17092385	20	33739254	A	0.00034009	0.2015	0.1138	0.09597	0.958066	1.06
type 2 diabetes	rs2295354	20	33356541	C	0.00021701	0.20182	0.386748	0.8883	0.998286	1.03
type 2 diabetes	rs2295353	20	33356511	T	0.00021698	0.20189	0.386749	0.8855	0.998273	1.03
type 2 diabetes	rs6119535	20	33442138	C	0.00021672	0.20313	0.382635	0.8595	0.998466	1.03
type 2 diabetes	rs2284378	20	32588095	C	0.00022141	0.20426	0.349	0.0003721	genotyped	1.04
type 2 diabetes	rs6142097	20	32687882	G	0.00022041	0.20458	0.350138	0.166	0.999648	1.04
type 2 diabetes	rs6120742	20	33435827	C	0.00021476	0.20743	0.38239	0.8171	0.997958	1.03
type 2 diabetes	rs2143230	20	32724345	T	0.0002154	0.21033	0.368722	0.03884	0.998366	1.03
type 2 diabetes	rs12480839	20	32727430	G	0.00021539	0.21037	0.368695	0.0385	0.998353	1.03
type 2 diabetes	rs74778497	20	32581570	G	0.00040322	0.21266	0.0706	0.563	genotyped	1.07
type 2 diabetes	rs2425000	20	33391141	C	0.00020854	0.21287	0.428354	0.9139	0.996865	1.03
type 2 diabetes	rs6059662	20	32675727	G	0.00021812	0.21345	0.344362	0.4056	0.987705	1.03
type 2 diabetes	rs1998028	20	33344595	T	0.00021134	0.21378	0.38719	0.8628	0.997999	1.03
type 2 diabetes	rs79078695	20	32654817	G	-0.00030268	0.21485	0.132786	0.572	0.999401	0.953
type 2 diabetes	rs6087625	20	33342477	A	0.00021077	0.21502	0.387213	0.86	0.997976	1.03
type 2 diabetes	rs6060057	20	33392283	G	0.00020748	0.21515	0.428364	0.9222	0.997459	1.03
type 2 diabetes	rs6119512	20	33306904	C	0.00021007	0.21657	0.387235	0.8685	0.997844	1.03
type 2 diabetes	rs113645189	20	32994363	C	-0.00055138	0.21708	0.036796	0.2565	0.965545	0.917
type 2 diabetes	rs4911413	20	32721775	A	0.00021215	0.21727	0.368828	0.04027	0.998292	1.03
type 2 diabetes	rs6087558	20	32714985	A	0.00021187	0.21784	0.368879	0.05395	0.998333	1.03
type 2 diabetes	rs4911411	20	32715842	T	0.00021163	0.21844	0.368889	0.05214	0.997957	1.03
type 2 diabetes	rs6119534	20	33441257	T	0.00021003	0.2185	0.379067	0.6876	0.997563	1.03
type 2 diabetes	rs117518577	20	32751459	A	-0.00041087	0.21946	0.0679263	0.9682	0.966569	0.937
type 2 diabetes	rs3787222	20	33333040	A	0.00020871	0.21968	0.387096	0.86	0.997449	1.03
type 2 diabetes	rs2284386	20	32644396	A	0.00021238	0.22236	0.3502	0.03028	genotyped	1.03
type 2 diabetes	rs2235596	20	32684309	A	0.00021192	0.22239	0.350819	0.1709	0.99916	1.03
type 2 diabetes	rs2206448	20	32709525	A	0.00020941	0.22327	0.368798	0.05531	0.998169	1.03
type 2 diabetes	rs6142102	20	32704627	G	0.00020942	0.22345	0.368594	0.1391	0.99725	1.03
type 2 diabetes	rs6087557	20	32698275	C	0.00021032	0.22605	0.350734	0.1744	0.998744	1.03
type 2 diabetes	rs6088788	20	33882720	G	-0.00020226	0.22702	0.436518	0.6619	0.99168	0.969
type 2 diabetes	rs6142098	20	32688294	C	0.00020972	0.2272	0.350798	0.1721	0.99932	1.03
type 2 diabetes	rs6060052	20	33382665	G	0.0002011	0.22915	0.430185	0.725	0.998331	1.03
type 2 diabetes	rs6059976	20	33261649	A	0.00020071	0.23277	0.45441	0.9087	0.975502	1.03
type 2 diabetes	rs639763	20	33861904	T	-0.00024636	0.23489	0.201371	0.1508	0.987589	0.962
type 2 diabetes	rs6120519	20	32688113	G	0.00020585	0.23585	0.350876	0.1781	0.999343	1.03
type 2 diabetes	rs11167245	20	33371537	C	-0.00019761	0.23732	0.430125	0.7752	0.998457	0.969
type 2 diabetes	rs2425042	20	33865895	A	-0.00024412	0.23732	0.202235	0.08882	0.992215	0.962
type 2 diabetes	rs6141514	20	33377565	T	-0.00019693	0.23891	0.430113	0.7672	0.998519	0.969
type 2 diabetes	rs4911410	20	32710974	A	0.00020245	0.23902	0.36892	0.05966	0.998035	1.03
type 2 diabetes	rs4911409	20	32710710	A	0.00020225	0.2395	0.368897	0.05917	0.997982	1.03
type 2 diabetes	rs6060038	20	33357715	A	-0.00019567	0.24195	0.430052	0.7832	0.998467	0.97
type 2 diabetes	rs2425051	20	33880363	T	-0.00019551	0.24242	0.427896	0.3836	0.99755	0.97
type 2 diabetes	rs6060048	20	33370266	C	-0.0001954	0.2426	0.430054	0.7966	0.998411	0.97
type 2 diabetes	rs910870	20	33292893	C	0.00019772	0.24361	0.39444	0.8302	0.996997	1.03
type 2 diabetes	rs62213657	20	33341129	T	-0.00019442	0.24508	0.429544	0.8235	0.998072	0.97
type 2 diabetes	rs4911441	20	33316546	C	-0.00019368	0.24686	0.429619	0.8344	0.998051	0.97
type 2 diabetes	rs7004	20	33866753	C	-0.00023871	0.24762	0.202352	0.08333	0.992989	0.963
type 2 diabetes	rs6141509	20	33319388	A	-0.00019321	0.24801	0.429608	0.8398	0.99815	0.97
type 2 diabetes	rs6088595	20	33358499	A	0.00019744	0.24805	0.376878	0.8416	0.997054	1.03
type 2 diabetes	rs6060013	20	33308809	G	-0.00019317	0.24812	0.429599	0.8371	0.998031	0.97
type 2 diabetes	rs6060015	20	33310057	T	-0.00019244	0.24991	0.429577	0.8371	0.998033	0.97
type 2 diabetes	rs6060039	20	33357945	T	-0.0001915	0.25214	0.429844	0.7965	0.998375	0.97
type 2 diabetes	rs79027916	20	32654818	C	0.00027868	0.25332	0.133	0.4199	genotyped	1.04
type 2 diabetes	rs1018503	20	33325516	G	-0.00019097	0.25357	0.429769	0.81	0.997936	0.97
type 2 diabetes	rs56244533	20	33434252	A	0.00019446	0.25387	0.382961	0.9051	0.996423	1.03
type 2 diabetes	rs3787219	20	33355261	T	-0.00019071	0.25417	0.429652	0.8127	0.997977	0.97
type 2 diabetes	rs11698996	20	33449739	G	0.00019442	0.25651	0.372532	0.9913	0.996902	1.03
type 2 diabetes	rs6060341	20	33863633	G	-0.00022998	0.2626	0.206074	0.06174	0.990302	0.964
type 2 diabetes	rs67159833	20	33488079	C	0.00018961	0.2699	0.367528	0.8286	0.99643	1.03
type 2 diabetes	rs2425053	20	33881820	G	-0.00022567	0.27057	0.205197	0.04832	0.998398	0.965
type 2 diabetes	rs34502964	20	33218638	A	0.00022195	0.2715	0.219112	0.1682	0.985183	1.04
type 2 diabetes	rs2425052	20	33880729	A	0.00018307	0.27342	0.4334	0.7544	genotyped	1.03
type 2 diabetes	rs35937789	20	32993390	C	0.00039951	0.27516	0.05418	0.9867	genotyped	1.06
type 2 diabetes	rs591590	20	33866028	G	0.0002224	0.27853	0.205783	0.0564	0.991973	1.04
type 2 diabetes	rs627106	20	33866029	T	0.00022206	0.27929	0.205771	0.05707	0.991929	1.04
type 2 diabetes	rs13043392	20	32606735	A	-0.00018637	0.27943	0.3634	0.9442	genotyped	0.971
type 2 diabetes	rs2425044	20	33869735	T	-0.00022212	0.28071	0.203232	0.06961	0.995186	0.966
type 2 diabetes	rs2076668	20	33437621	G	-0.00018384	0.28264	0.379	0.08074	genotyped	0.971
type 2 diabetes	rs13041102	20	33369011	A	-0.00041959	0.28324	0.0484813	0.1011	0.968381	0.936
type 2 diabetes	rs6058108	20	33288655	G	0.00018156	0.28436	0.395269	0.7614	0.99567	1.03
type 2 diabetes	rs6058224	20	33881774	A	-0.00021837	0.28655	0.205053	0.05184	0.998322	0.966
type 2 diabetes	rs8122819	20	33881586	T	-0.00021703	0.28952	0.205021	0.05374	0.998637	0.966
type 2 diabetes	rs910869	20	33292777	T	0.00017899	0.29139	0.393556	0.8665	0.996534	1.03
type 2 diabetes	rs2297789	20	33867248	T	-0.00021565	0.29304	0.205899	0.06284	0.993117	0.967
type 2 diabetes	rs17092209	20	33592721	A	-0.00026395	0.29382	0.1242	0.1509	genotyped	0.959
type 2 diabetes	rs6087619	20	33288511	C	0.0001779	0.29431	0.394867	0.745	0.995812	1.03
type 2 diabetes	rs6087618	20	33288407	T	0.00017787	0.29437	0.394868	0.745	0.995799	1.03
type 2 diabetes	rs112310554	20	32895324	G	0.00023646	0.29594	0.173057	0.1555	0.934132	1.04
type 2 diabetes	rs2378256	20	33292127	C	0.00017635	0.29856	0.394019	0.8525	0.996241	1.03
type 2 diabetes	rs2425049	20	33874720	C	0.0002106	0.30263	0.2084	0.6304	genotyped	1.03
type 2 diabetes	rs7272884	20	33883015	G	0.00020763	0.31187	0.2043	0.2601	genotyped	1.03
type 2 diabetes	rs6119595	20	33869301	T	-0.00020547	0.31455	0.207735	0.04561	0.994654	0.968
type 2 diabetes	rs6058209	20	33821577	A	-0.00017834	0.31535	0.320561	0.7475	0.995704	0.972
type 2 diabetes	rs2425045	20	33869824	C	-0.00020401	0.31792	0.207579	0.04617	0.99555	0.968
type 2 diabetes	rs8117042	20	33868913	G	-0.00020295	0.32116	0.207065	0.05108	0.993914	0.969
type 2 diabetes	rs6060347	20	33874151	G	-0.00020212	0.32218	0.206976	0.05439	0.998382	0.969
type 2 diabetes	rs6060270	20	33736814	T	-0.00020046	0.3236	0.210256	0.7152	0.999215	0.969
type 2 diabetes	rs6120889	20	33870053	A	-0.00020108	0.32558	0.206764	0.05219	0.995369	0.969
type 2 diabetes	rs932562	20	33871310	C	-0.00020072	0.32626	0.206761	0.05158	0.996305	0.969
type 2 diabetes	rs75632179	20	33611208	G	-0.00045302	0.32752	0.0344476	0.2025	0.956544	0.931
type 2 diabetes	rs11696967	20	33743609	C	-0.00019855	0.32847	0.209962	0.7931	0.999528	0.969
type 2 diabetes	rs6058193	20	33734464	G	-0.00019796	0.32968	0.210219	0.6735	0.999328	0.969
type 2 diabetes	rs2250205	20	33867924	A	-0.00019934	0.33006	0.206957	0.0522	0.993352	0.969
type 2 diabetes	rs2050210	20	32485650	A	0.00018811	0.33008	0.25242	0.1571	0.974843	1.03
type 2 diabetes	rs41310801	20	33584310	A	-0.00044903	0.3302	0.0344632	0.1747	0.962314	0.932
type 2 diabetes	rs41312284	20	33584304	A	-0.00044899	0.33035	0.0344549	0.1747	0.962152	0.932
type 2 diabetes	rs6088732	20	33744134	T	-0.00019737	0.33132	0.209999	0.817	0.999577	0.969
type 2 diabetes	rs2425043	20	33868702	C	-0.00019851	0.332	0.206937	0.05284	0.993562	0.969
type 2 diabetes	rs2275275	20	33872311	C	-0.00019689	0.33534	0.206821	0.06033	0.997144	0.969
type 2 diabetes	rs2425047	20	33871675	C	-0.00019503	0.34021	0.206729	0.06171	0.996246	0.97
type 2 diabetes	rs7280	20	33864484	G	-0.00015957	0.34415	0.415527	0.7588	0.989393	0.975
type 2 diabetes	rs6060300	20	33780970	C	-0.00020208	0.34585	0.184454	0.9548	0.98993	0.969
type 2 diabetes	rs6058195	20	33740005	C	-0.00019115	0.34679	0.210024	0.7971	0.999232	0.97
type 2 diabetes	rs6579227	20	33879206	T	-0.00023472	0.34684	0.12632	0.03688	0.992977	0.964
type 2 diabetes	rs2425024	20	33844938	A	0.0001664	0.34719	0.3234	0.9876	genotyped	1.03
type 2 diabetes	rs6058194	20	33739831	A	-0.00019086	0.34755	0.210019	0.7971	0.999198	0.97
type 2 diabetes	rs2425023	20	33832494	C	-0.00016494	0.34849	0.33516	0.8934	0.992037	0.974
type 2 diabetes	rs11700255	20	32682325	T	0.00016215	0.34905	0.359478	0.8414	0.992588	1.03
type 2 diabetes	rs2425046	20	33871661	C	-0.00023452	0.35075	0.12451	0.03471	0.990593	0.964
type 2 diabetes	rs2425048	20	33872723	T	-0.0002277	0.36476	0.124364	0.03267	0.992176	0.965
type 2 diabetes	rs6088776	20	33835773	C	-0.00021725	0.36553	0.138563	0.9828	0.994626	0.966
type 2 diabetes	rs35595751	20	32721584	T	0.00015509	0.37022	0.359574	0.827	0.993549	1.02
type 2 diabetes	rs117075207	20	33074607	G	0.00030549	0.37367	0.06211	1	genotyped	1.05
type 2 diabetes	rs6088765	20	33799280	T	0.00014907	0.37519	0.4182	0.2795	genotyped	1.02
type 2 diabetes	rs141121880	20	34394901	T	-0.00043127	0.38795	0.0284322	0.4884	0.991842	0.934
type 2 diabetes	rs6088764	20	33793159	A	-0.00016026	0.39069	0.274892	0.6245	0.983483	0.975
type 2 diabetes	rs6060266	20	33733078	C	-0.00017312	0.39501	0.209335	0.7259	0.99796	0.973
type 2 diabetes	rs6088619	20	33411871	G	-0.00020645	0.39517	0.136756	0.4192	0.985849	0.968
type 2 diabetes	rs6119510	20	33287782	G	0.00014229	0.4007	0.400814	0.8116	0.994086	1.02
type 2 diabetes	rs6579129	20	32533524	T	0.00014369	0.41999	0.315438	0.1288	0.997147	1.02
type 2 diabetes	rs113921126	20	33326680	C	-0.00028995	0.42128	0.0576976	0.5074	0.969594	0.955
type 2 diabetes	rs34106705	20	32537166	T	-0.00014341	0.42147	0.3156	0.8066	genotyped	0.978
type 2 diabetes	rs6087685	20	33777612	C	-0.00014887	0.42266	0.274401	0.7643	0.997306	0.977
type 2 diabetes	rs6120663	20	33081906	A	0.00013254	0.4274	0.439027	0.3116	0.997583	1.02
type 2 diabetes	rs79907658	20	34108545	G	0.00044182	0.42994	0.02235	0.3844	genotyped	1.07
type 2 diabetes	rs4911429	20	33133553	A	-0.00014365	0.43153	0.307145	0.7618	0.963995	0.978
type 2 diabetes	rs6060273	20	33744323	C	-0.00015791	0.43504	0.212569	0.9959	0.999769	0.975
type 2 diabetes	rs10747514	20	33775369	A	-0.00014477	0.43549	0.274263	0.7286	0.997911	0.977
type 2 diabetes	rs6060276	20	33750479	C	-0.0001547	0.4445	0.212661	0.8946	0.999268	0.976
type 2 diabetes	rs6060288	20	33772243	A	-0.00014184	0.44477	0.274171	0.6808	0.998459	0.978
type 2 diabetes	rs6120849	20	33730387	C	0.00015461	0.44563	0.2118	0.767	genotyped	1.02
type 2 diabetes	rs6087681	20	33752896	C	-0.00015275	0.45396	0.210294	0.7545	0.99155	0.976
type 2 diabetes	rs6087682	20	33752897	T	-0.0001526	0.45444	0.210285	0.7545	0.991499	0.976
type 2 diabetes	rs13044031	20	33123035	A	0.00027372	0.45564	0.05432	8.724e-06	genotyped	1.04
type 2 diabetes	rs12624640	20	32952125	A	0.00012488	0.45643	0.428495	0.3328	0.996149	1.02
type 2 diabetes	rs6120848	20	33728678	C	-0.00015056	0.45769	0.211866	0.7132	0.996959	0.977
type 2 diabetes	rs6088735	20	33745676	C	0.00015079	0.45785	0.2117	0.1917	genotyped	1.02
type 2 diabetes	rs112265587	20	33319716	C	-0.00026361	0.45848	0.0583025	0.5187	0.98714	0.959
type 2 diabetes	rs13044413	20	33020957	G	0.00012368	0.45921	0.439666	0.2543	0.99617	1.02
type 2 diabetes	rs6088409	20	32734785	G	-0.00013647	0.45954	0.282055	0.09424	0.997208	0.979
type 2 diabetes	rs6060278	20	33753262	T	0.00014967	0.45994	0.2131	0.2559	genotyped	1.02
type 2 diabetes	rs13040631	20	33747714	C	-0.00014896	0.4615	0.212683	0.8946	0.999607	0.977
type 2 diabetes	rs6088737	20	33745938	G	-0.00014869	0.46226	0.212687	0.8906	0.999912	0.977
type 2 diabetes	rs6088739	20	33748724	A	-0.00014852	0.46286	0.212671	0.8624	0.99942	0.977
type 2 diabetes	rs6088743	20	33749657	G	-0.0001478	0.46508	0.212756	0.8624	0.998953	0.977
type 2 diabetes	rs6142137	20	32903904	C	0.00012345	0.46538	0.42853	0.6446	0.977169	1.02
type 2 diabetes	rs6088738	20	33747331	A	-0.00014737	0.46626	0.21272	0.8785	0.999665	0.977
type 2 diabetes	rs6088461	20	32905161	T	0.00012178	0.46865	0.42632	0.3571	0.992163	1.02
type 2 diabetes	rs36078366	20	33215724	G	-0.0002142	0.46904	0.0874192	0.8145	0.980778	0.967
type 2 diabetes	rs34204895	20	33193313	C	0.00021061	0.47024	0.08877	0.4802	genotyped	1.03
type 2 diabetes	rs13043666	20	32570632	C	0.00015578	0.47657	0.17487	0.4847	0.992445	1.02
type 2 diabetes	rs6088519	20	33132191	C	-0.00013247	0.47659	0.2792	1.056e-11	genotyped	0.979
type 2 diabetes	rs45465702	20	33320571	T	-0.00015258	0.47747	0.1825	0.08978	genotyped	0.976
type 2 diabetes	rs977936	20	33790993	T	-0.00015198	0.47779	0.186185	0.9191	0.985036	0.976
type 2 diabetes	rs6087613	20	33238981	A	-0.00018057	0.47829	0.123936	0.2307	0.974516	0.972
type 2 diabetes	rs6060308	20	33794378	A	-0.00013407	0.4788	0.263744	0.4353	0.981337	0.979
type 2 diabetes	rs6142329	20	33795623	G	0.00011732	0.48585	0.439235	0.8995	0.979456	1.02
type 2 diabetes	rs6088638	20	33470514	C	0.00015259	0.48671	0.17391	0.0972	0.992771	1.02
type 2 diabetes	rs112928119	20	33726451	T	-0.0001411	0.48684	0.211859	0.5869	0.994785	0.978
type 2 diabetes	rs147818986	20	32515056	A	0.00015174	0.48771	0.181518	0.8189	0.963695	1.02
type 2 diabetes	rs6088733	20	33744904	A	0.00013867	0.49931	0.2121	7.715e-08	genotyped	1.02
type 2 diabetes	rs2273684	20	33529766	G	0.00011248	0.50282	0.445412	0.4154	0.982417	1.02
type 2 diabetes	rs13044142	20	33482040	T	-0.00020181	0.50585	0.0850205	0.9379	0.953437	0.969
type 2 diabetes	rs2425032	20	33855454	C	-0.00015774	0.50999	0.140999	0.2986	0.984279	0.975
type 2 diabetes	rs2425019	20	33819415	G	-0.00010987	0.51228	0.430419	0.441	0.99324	0.983
type 2 diabetes	rs6058146	20	33540529	G	0.00011132	0.51233	0.391987	0.6361	0.995594	1.02
type 2 diabetes	rs2065003	20	33538521	G	0.00011109	0.51324	0.391959	0.6335	0.995552	1.02
type 2 diabetes	rs6120854	20	33757180	T	-0.00013196	0.51538	0.212334	0.6304	0.995099	0.979
type 2 diabetes	rs2378254	20	33283649	A	0.00011034	0.52556	0.356859	0.7912	0.98736	1.02
type 2 diabetes	rs6088741	20	33748779	A	-0.00012867	0.5339	0.202075	0.924	0.992637	0.98
type 2 diabetes	rs6088740	20	33748769	C	-0.00012842	0.53472	0.202047	0.9325	0.99267	0.98
type 2 diabetes	rs78836409	20	32903004	G	0.00021788	0.5388	0.05801	0.8645	genotyped	1.03
type 2 diabetes	rs1124511	20	33736697	C	-0.0001018	0.53955	0.475183	0.1854	0.998852	0.984
type 2 diabetes	rs1015362	20	32738612	C	0.0001133	0.54123	0.2775	0.02057	genotyped	1.02
type 2 diabetes	rs6088742	20	33748835	A	-0.00012595	0.54249	0.202013	0.9367	0.993285	0.98
type 2 diabetes	rs945959	20	33734905	C	-0.00010092	0.54297	0.475201	0.1787	0.999205	0.984
type 2 diabetes	rs6060267	20	33734012	G	-0.0001009	0.54303	0.475206	0.1821	0.99931	0.984
type 2 diabetes	rs6088730	20	33733704	G	-0.00010078	0.5435	0.475202	0.1821	0.999341	0.984
type 2 diabetes	rs6060268	20	33734293	C	-0.00010063	0.54414	0.475147	0.1866	0.999144	0.984
type 2 diabetes	rs1415771	20	33734493	A	-0.00010063	0.54418	0.475146	0.1866	0.999111	0.984
type 2 diabetes	rs6059691	20	32736967	G	-0.00011155	0.54712	0.277551	0.09884	0.999014	0.983
type 2 diabetes	rs12481169	20	33794510	C	0.00010086	0.54874	0.438594	0.8885	0.981619	1.02
type 2 diabetes	rs6060302	20	33783493	A	-0.00014399	0.5502	0.138232	0.9657	0.988256	0.978
type 2 diabetes	rs6058219	20	33859244	C	-0.00014414	0.55289	0.13529	0.319	0.988947	0.978
type 2 diabetes	rs2425031	20	33855284	C	-0.00014352	0.55359	0.13559	0.2536	0.992883	0.978
type 2 diabetes	rs6060283	20	33767865	G	-0.00012588	0.55405	0.186432	0.9284	0.997737	0.98
type 2 diabetes	rs2378346	20	33854104	G	-0.0001429	0.55511	0.135559	0.2659	0.99425	0.978
type 2 diabetes	rs6120757	20	33488771	T	0.0001007	0.55526	0.377904	0.8703	0.999452	1.02
type 2 diabetes	rs6088411	20	32739907	C	-0.00010929	0.55526	0.277562	0.098	0.999282	0.983
type 2 diabetes	rs6058149	20	33554488	G	0.00010284	0.55726	0.337406	0.5	0.997161	1.02
type 2 diabetes	rs6058135	20	33470164	C	9.9949e-05	0.55826	0.377691	0.8474	0.999555	1.02
type 2 diabetes	rs6058137	20	33475074	A	9.9939e-05	0.5583	0.377689	0.856	0.999562	1.02
type 2 diabetes	rs8116657	20	33476474	G	9.992e-05	0.55838	0.377688	0.856	0.999557	1.02
type 2 diabetes	rs4911164	20	33479488	C	9.9787e-05	0.5589	0.377677	0.8731	0.999544	1.02
type 2 diabetes	rs6088647	20	33505997	C	9.9793e-05	0.55891	0.377669	0.8731	0.999393	1.02
type 2 diabetes	rs4911450	20	33512406	T	9.9686e-05	0.55932	0.377656	0.8702	0.999464	1.02
type 2 diabetes	rs2223881	20	33506463	C	9.9675e-05	0.55936	0.377656	0.8731	0.99947	1.02
type 2 diabetes	rs6088635	20	33466501	G	9.9656e-05	0.55948	0.377623	0.8531	0.999273	1.02
type 2 diabetes	rs8117380	20	33485939	G	9.9619e-05	0.55955	0.377668	0.876	0.999598	1.02
type 2 diabetes	rs2378292	20	33485178	C	9.9612e-05	0.55958	0.377669	0.876	0.999596	1.02
type 2 diabetes	rs8117491	20	33510120	C	9.959e-05	0.55971	0.377654	0.8845	0.999423	1.02
type 2 diabetes	rs6060107	20	33475601	C	9.9565e-05	0.55978	0.377679	0.8588	0.999706	1.02
type 2 diabetes	rs56103637	20	33490921	G	9.9516e-05	0.55996	0.377665	0.8731	0.999619	1.02
type 2 diabetes	rs1801310	20	33517014	G	9.9471e-05	0.56017	0.377644	0.8702	0.999428	1.02
type 2 diabetes	rs2273683	20	33509523	T	9.914e-05	0.56148	0.37764	0.8788	0.999598	1.02
type 2 diabetes	rs2064454	20	33496169	T	9.9087e-05	0.56169	0.377642	0.8788	0.9996	1.02
type 2 diabetes	rs2180568	20	33794794	G	9.7536e-05	0.56208	0.438102	0.933	0.98127	1.02
type 2 diabetes	rs6060112	20	33489276	T	9.8953e-05	0.56219	0.377645	0.8759	0.999736	1.02
type 2 diabetes	rs1205411	20	33857242	T	-0.00014049	0.5626	0.135341	0.227	0.990808	0.978
type 2 diabetes	rs2425037	20	33856429	T	-0.00014046	0.56273	0.135232	0.2686	0.991418	0.978
type 2 diabetes	rs2425035	20	33855819	C	-0.00014021	0.56302	0.135344	0.2783	0.992994	0.978
type 2 diabetes	rs734111	20	33533736	C	9.8878e-05	0.56303	0.379271	0.7001	0.995412	1.02
type 2 diabetes	rs2425036	20	33855981	C	-0.00013993	0.56385	0.135331	0.2815	0.992757	0.978
type 2 diabetes	rs3746450	20	33508588	T	9.8374e-05	0.56444	0.378471	0.8789	0.99924	1.02
type 2 diabetes	rs2425034	20	33855814	C	-0.00013962	0.56466	0.135337	0.2783	0.993029	0.978
type 2 diabetes	rs6088642	20	33483186	T	9.8116e-05	0.56536	0.378353	0.8875	0.999858	1.02
type 2 diabetes	rs6120754	20	33482189	A	9.8063e-05	0.56557	0.37835	0.8875	0.999868	1.02
type 2 diabetes	rs6087649	20	33510662	G	9.8024e-05	0.56585	0.378508	0.8789	0.999095	1.02
type 2 diabetes	rs6088646	20	33505937	C	9.7962e-05	0.56605	0.378416	0.876	0.999352	1.02
type 2 diabetes	rs6057994	20	32743463	G	-0.00010633	0.56618	0.277526	0.09883	0.998267	0.983
type 2 diabetes	rs1475070	20	33563099	T	0.0001007	0.56653	0.333557	0.397	0.997689	1.02
type 2 diabetes	rs2425026	20	33847253	T	-9.6302e-05	0.56668	0.427994	0.4107	0.989803	0.985
type 2 diabetes	rs13041173	20	32542814	G	9.9733e-05	0.56815	0.342174	0.1842	0.995707	1.02
type 2 diabetes	rs6088734	20	33745046	T	-9.497e-05	0.56974	0.43727	0.405	0.99818	0.985
type 2 diabetes	rs138203209	20	34213120	G	-0.0003178	0.57316	0.0220709	0.0491	0.993403	0.951
type 2 diabetes	rs6058198	20	33748253	A	-9.3787e-05	0.57463	0.437239	0.3743	0.997865	0.985
type 2 diabetes	rs143975064	20	33772728	A	-0.00021265	0.57524	0.0528687	0.7091	0.949018	0.967
type 2 diabetes	rs6142327	20	33793147	A	9.3784e-05	0.57699	0.438379	0.7823	0.982642	1.01
type 2 diabetes	rs6579167	20	33032915	C	0.00011281	0.57777	0.217125	0.1025	0.984017	1.02
type 2 diabetes	rs6088520	20	33132364	C	9.2115e-05	0.57948	0.4733	0.05245	genotyped	1.01
type 2 diabetes	rs112825656	20	32948518	A	0.00011836	0.58116	0.193153	0.09288	0.952373	1.02
type 2 diabetes	rs8122889	20	33424151	G	9.3833e-05	0.58201	0.384905	0.7753	0.995263	1.01
type 2 diabetes	rs6579204	20	33553677	G	9.6237e-05	0.58268	0.338001	0.5372	0.996995	1.02
type 2 diabetes	rs73610830	20	32863523	G	9.8013e-05	0.58314	0.320551	0.4441	0.987163	1.02
type 2 diabetes	rs77042903	20	32668624	C	-0.00011673	0.58334	0.1873	0.1332	genotyped	0.982
type 2 diabetes	rs2236271	20	33523840	C	9.3057e-05	0.58566	0.382452	0.8028	0.995051	1.01
type 2 diabetes	rs2425040	20	33858878	A	-0.00013197	0.587	0.135143	0.3873	0.989272	0.979
type 2 diabetes	rs4911455	20	33553062	C	9.4862e-05	0.5882	0.337669	0.4976	0.997023	1.02
type 2 diabetes	rs6059743	20	32847711	G	-9.0482e-05	0.59062	0.4169	0.3871	genotyped	0.986
type 2 diabetes	rs6142321	20	33788474	A	8.9395e-05	0.59355	0.438102	0.6546	0.991452	1.01
type 2 diabetes	rs7263251	20	33554320	C	9.2948e-05	0.59559	0.338133	0.5101	0.997109	1.01
type 2 diabetes	rs6060133	20	33558011	C	9.2914e-05	0.59571	0.338133	0.5003	0.997281	1.01
type 2 diabetes	rs6142322	20	33788538	A	8.8869e-05	0.59575	0.438314	0.6422	0.990675	1.01
type 2 diabetes	rs6142320	20	33788193	G	8.8542e-05	0.59707	0.438145	0.6446	0.991461	1.01
type 2 diabetes	rs6060127	20	33538999	C	9.2652e-05	0.59721	0.337164	0.464	0.995958	1.01
type 2 diabetes	rs6060128	20	33540587	T	9.264e-05	0.5973	0.337135	0.4664	0.995831	1.01
type 2 diabetes	rs1577924	20	33784288	G	8.844e-05	0.5974	0.43832	0.6571	0.991583	1.01
type 2 diabetes	rs17310328	20	33540565	C	9.2578e-05	0.59754	0.337137	0.4641	0.99584	1.01
type 2 diabetes	rs6088660	20	33542896	T	9.2034e-05	0.59963	0.337167	0.4712	0.996174	1.01
type 2 diabetes	rs4911475	20	33780334	A	8.7868e-05	0.59968	0.437978	0.6372	0.992619	1.01
type 2 diabetes	rs35024451	20	33542081	C	9.1925e-05	0.60006	0.337182	0.4735	0.996168	1.01
type 2 diabetes	rs2093059	20	33791310	C	8.7552e-05	0.60185	0.438535	0.6921	0.986803	1.01
type 2 diabetes	rs1987165	20	33756206	C	-8.7221e-05	0.60197	0.437223	0.4911	0.99604	0.986
type 2 diabetes	rs4911478	20	33782625	C	8.725e-05	0.60234	0.438373	0.6521	0.991362	1.01
type 2 diabetes	rs2425041	20	33859013	A	-0.00012635	0.60324	0.134962	0.344	0.989529	0.98
type 2 diabetes	rs17092195	20	33559251	C	9.0724e-05	0.60446	0.338057	0.4763	0.997183	1.01
type 2 diabetes	rs2103971	20	33786256	C	8.6724e-05	0.6046	0.438228	0.6521	0.991387	1.01
type 2 diabetes	rs6088665	20	33551218	G	9.0663e-05	0.60477	0.338008	0.46	0.996736	1.01
type 2 diabetes	rs4911476	20	33780768	C	8.6597e-05	0.605	0.438249	0.6298	0.991951	1.01
type 2 diabetes	rs34515766	20	33785221	G	8.6577e-05	0.60515	0.438373	0.6597	0.991545	1.01
type 2 diabetes	rs3746429	20	33703607	C	0.00011558	0.606	0.1632	0.8808	genotyped	1.02
type 2 diabetes	rs8183502	20	32805399	A	9.2713e-05	0.60603	0.310408	0.3482	0.991902	1.01
type 2 diabetes	rs74786956	20	33786043	C	8.617e-05	0.60688	0.43842	0.6647	0.991114	1.01
type 2 diabetes	rs6088747	20	33754604	T	-8.6107e-05	0.60692	0.439343	0.3814	0.993868	0.987
type 2 diabetes	rs34837802	20	33424908	G	8.743e-05	0.60807	0.384662	0.7587	0.995205	1.01
type 2 diabetes	rs6142313	20	33780427	G	8.581e-05	0.60825	0.438257	0.6521	0.992108	1.01
type 2 diabetes	rs2064453	20	33460810	C	8.7245e-05	0.60951	0.377838	0.8674	0.998499	1.01
type 2 diabetes	rs6060151	20	33594226	T	8.6899e-05	0.61016	0.3881	0.0148	genotyped	1.01
type 2 diabetes	rs7263157	20	33459127	A	8.6676e-05	0.61191	0.377776	0.8702	0.997973	1.01
type 2 diabetes	rs819135	20	32847767	G	8.4328e-05	0.61585	0.416849	0.534	0.998932	1.01
type 2 diabetes	rs8114671	20	33789142	A	8.3527e-05	0.61806	0.437865	0.6874	0.990913	1.01
type 2 diabetes	rs6087571	20	32912091	G	-0.00012195	0.61831	0.136428	0.2923	0.972198	0.981
type 2 diabetes	rs2425027	20	33849390	G	-0.00012015	0.61971	0.135039	0.2874	0.998861	0.981
type 2 diabetes	rs35381853	20	33790171	C	8.3187e-05	0.61982	0.437973	0.6848	0.988635	1.01
type 2 diabetes	rs12626023	20	33416536	T	8.391e-05	0.62295	0.381318	0.6378	0.996578	1.01
type 2 diabetes	rs139382501	20	34343695	T	-0.00027905	0.62295	0.0219431	0.1432	0.98704	0.957
type 2 diabetes	rs6142324	20	33789043	T	8.2241e-05	0.62349	0.43793	0.6874	0.990603	1.01
type 2 diabetes	rs6119536	20	33450041	T	8.3893e-05	0.62378	0.377598	0.9768	0.995407	1.01
type 2 diabetes	rs6060130	20	33549319	T	8.3214e-05	0.62408	0.392758	0.6989	0.996082	1.01
type 2 diabetes	rs6088621	20	33418740	T	8.3631e-05	0.62416	0.381314	0.661	0.995996	1.01
type 2 diabetes	rs34542479	20	33790120	G	8.1703e-05	0.62604	0.438058	0.6873	0.988825	1.01
type 2 diabetes	rs6088658	20	33540489	C	8.5156e-05	0.62716	0.337402	0.4712	0.995746	1.01
type 2 diabetes	rs2093058	20	33791281	A	8.1367e-05	0.62782	0.43793	0.687	0.986964	1.01
type 2 diabetes	rs35416056	20	33538214	G	0.00017224	0.62857	0.05751	0.3813	genotyped	1.03
type 2 diabetes	rs2378261	20	33538384	T	8.4357e-05	0.63038	0.337448	0.4665	0.995834	1.01
type 2 diabetes	rs79965102	20	33593847	A	-0.00017208	0.6311	0.0574254	0.778	0.985757	0.973
type 2 diabetes	rs6088622	20	33419977	A	8.1332e-05	0.63385	0.380911	0.6953	0.996039	1.01
type 2 diabetes	rs7353271	20	33727431	T	-0.00010669	0.63458	0.163026	0.9052	0.995144	0.983
type 2 diabetes	rs6088744	20	33750142	C	-7.8476e-05	0.6363	0.478193	0.2069	0.997855	0.988
type 2 diabetes	rs36012778	20	32579941	T	-0.0001722	0.63868	0.05405	0.2497	genotyped	0.973
type 2 diabetes	rs6060068	20	33415820	A	7.9788e-05	0.64014	0.381111	0.6327	0.996838	1.01
type 2 diabetes	rs2378262	20	33550774	G	7.8962e-05	0.64189	0.392536	0.7363	0.996453	1.01
type 2 diabetes	rs6060132	20	33556695	A	8.1232e-05	0.64371	0.334256	0.5866	0.996923	1.01
type 2 diabetes	rs6087644	20	33480917	C	7.9269e-05	0.64374	0.37416	0.8582	0.995165	1.01
type 2 diabetes	rs7260770	20	33552653	A	7.9629e-05	0.65033	0.334313	0.5656	0.996424	1.01
type 2 diabetes	rs2024635	20	33422614	A	7.6885e-05	0.65253	0.38114	0.6954	0.995466	1.01
type 2 diabetes	rs6141488	20	33192746	G	-7.888e-05	0.65718	0.32726	0.3667	0.985915	0.988
type 2 diabetes	rs2145557	20	33667560	G	7.5041e-05	0.65893	0.38809	0.4131	0.999144	1.01
type 2 diabetes	rs2180847	20	33667763	T	7.5038e-05	0.65895	0.388089	0.4131	0.999145	1.01
type 2 diabetes	rs8116198	20	33114201	A	0.00010563	0.66022	0.1387	0.09649	genotyped	1.02
type 2 diabetes	rs4911167	20	33590096	G	7.4673e-05	0.66047	0.388153	0.4531	0.999194	1.01
type 2 diabetes	rs1058003	20	33590417	A	7.4557e-05	0.66113	0.387825	0.4445	0.99859	1.01
type 2 diabetes	rs6087670	20	33662269	T	7.4131e-05	0.66278	0.388128	0.4111	0.999293	1.01
type 2 diabetes	rs1885119	20	33645649	C	7.3875e-05	0.66388	0.388036	0.4488	0.999357	1.01
type 2 diabetes	rs10875491	20	33614145	A	7.3813e-05	0.66409	0.388043	0.4467	0.999568	1.01
type 2 diabetes	rs6060205	20	33658869	A	7.3744e-05	0.66444	0.388115	0.409	0.999266	1.01
type 2 diabetes	rs6087658	20	33606204	G	7.3677e-05	0.66466	0.388082	0.4531	0.999736	1.01
type 2 diabetes	rs6060167	20	33620611	A	7.3614e-05	0.66493	0.388077	0.4531	0.999753	1.01
type 2 diabetes	rs6120746	20	33448496	G	7.4064e-05	0.66495	0.377403	0.9536	0.996206	1.01
type 2 diabetes	rs6058166	20	33656710	G	7.3625e-05	0.66495	0.388112	0.407	0.999272	1.01
type 2 diabetes	rs2378332	20	33617250	G	7.3593e-05	0.66502	0.388073	0.4531	0.999631	1.01
type 2 diabetes	rs6088676	20	33607426	C	7.3571e-05	0.66512	0.38809	0.4531	0.99962	1.01
type 2 diabetes	rs4911460	20	33624330	A	7.3423e-05	0.66575	0.388069	0.4488	0.999762	1.01
type 2 diabetes	rs6060170	20	33624466	G	7.3423e-05	0.66575	0.388069	0.4488	0.999762	1.01
type 2 diabetes	rs6060162	20	33611461	G	7.3416e-05	0.66577	0.388067	0.4531	0.999743	1.01
type 2 diabetes	rs6087664	20	33626216	G	7.3417e-05	0.66577	0.388068	0.4488	0.999763	1.01
type 2 diabetes	rs6088687	20	33624750	A	7.3417e-05	0.66577	0.388068	0.4488	0.999759	1.01
type 2 diabetes	rs6060175	20	33631936	A	7.3417e-05	0.6658	0.388085	0.4467	0.999553	1.01
type 2 diabetes	rs6087660	20	33616528	C	7.3378e-05	0.66594	0.388064	0.451	0.99964	1.01
type 2 diabetes	rs6060164	20	33616314	G	7.333e-05	0.66614	0.388063	0.4531	0.99964	1.01
type 2 diabetes	rs10875492	20	33631407	T	7.3303e-05	0.66626	0.388066	0.4467	0.999756	1.01
type 2 diabetes	rs1358854	20	33633659	A	7.3304e-05	0.66626	0.388066	0.4467	0.999756	1.01
type 2 diabetes	rs3803938	20	33632600	T	7.3303e-05	0.66626	0.388066	0.4467	0.999756	1.01
type 2 diabetes	rs35193912	20	33785050	T	7.2265e-05	0.66639	0.435823	0.6441	0.990929	1.01
type 2 diabetes	rs2425011	20	33581689	C	7.3155e-05	0.66691	0.387949	0.5345	0.999401	1.01
type 2 diabetes	rs2065978	20	33767291	T	-7.1825e-05	0.66699	0.437857	0.5671	0.999578	0.989
type 2 diabetes	rs4911169	20	33593834	A	7.3063e-05	0.66728	0.388032	0.4297	0.999864	1.01
type 2 diabetes	rs3746431	20	33593457	C	7.3011e-05	0.66749	0.38805	0.4318	0.999881	1.01
type 2 diabetes	rs4911168	20	33593789	G	7.2995e-05	0.66756	0.38805	0.4318	0.999897	1.01
type 2 diabetes	rs6088692	20	33638588	G	7.2868e-05	0.66813	0.388053	0.4402	0.99973	1.01
type 2 diabetes	rs6142283	20	33639206	T	7.2867e-05	0.66813	0.388053	0.4402	0.999731	1.01
type 2 diabetes	rs6120785	20	33580237	G	7.2854e-05	0.6682	0.387939	0.5393	0.999441	1.01
type 2 diabetes	rs4911462	20	33642732	T	7.2852e-05	0.66821	0.388066	0.4402	0.999679	1.01
type 2 diabetes	rs4911463	20	33642737	A	7.2796e-05	0.66844	0.388056	0.4402	0.999715	1.01
type 2 diabetes	rs2425013	20	33582731	T	7.2808e-05	0.66844	0.388027	0.4973	0.999144	1.01
type 2 diabetes	rs6120816	20	33644358	C	7.2565e-05	0.66943	0.388047	0.4402	0.99972	1.01
type 2 diabetes	rs1415773	20	33765585	A	-7.1267e-05	0.66958	0.437631	0.5765	0.998739	0.989
type 2 diabetes	rs3803937	20	33632687	A	7.2501e-05	0.66967	0.388221	0.4707	0.999649	1.01
type 2 diabetes	rs6088704	20	33677621	C	7.2451e-05	0.67007	0.388003	0.4616	0.998439	1.01
type 2 diabetes	rs6060214	20	33677669	T	7.2357e-05	0.67047	0.388003	0.4595	0.998436	1.01
type 2 diabetes	rs3746427	20	33730464	G	-7.1054e-05	0.67085	0.438	0.1458	genotyped	0.989
type 2 diabetes	rs6060212	20	33676951	C	7.2265e-05	0.67089	0.388017	0.4682	0.998348	1.01
type 2 diabetes	rs6060215	20	33677860	A	7.196e-05	0.67217	0.387987	0.453	0.998492	1.01
type 2 diabetes	rs2425010	20	33581540	T	7.1258e-05	0.67506	0.38802	0.5608	0.999297	1.01
type 2 diabetes	rs17404569	20	33674077	C	6.9857e-05	0.67609	0.43319	0.6289	0.99846	1.01
type 2 diabetes	rs2025096	20	33540000	A	8.8561e-05	0.67677	0.187167	0.2748	0.996067	1.01
type 2 diabetes	rs11167248	20	33538721	T	8.8529e-05	0.6769	0.18717	0.2602	0.995908	1.01
type 2 diabetes	rs6060285	20	33770487	T	-6.955e-05	0.67693	0.437959	0.5789	0.999604	0.989
type 2 diabetes	rs2273636	20	33595300	T	7.075e-05	0.67725	0.388122	0.4706	0.999201	1.01
type 2 diabetes	rs2069944	20	33761498	G	-6.9439e-05	0.6775	0.437222	0.6346	0.999231	0.989
type 2 diabetes	rs2378337	20	33771435	A	-6.9192e-05	0.67922	0.4385	0.05844	genotyped	0.989
type 2 diabetes	rs4911165	20	33550382	C	7.2538e-05	0.67944	0.335038	0.6325	0.996541	1.01
type 2 diabetes	rs2180485	20	33278442	C	7.0762e-05	0.68111	0.367106	0.8915	0.994252	1.01
type 2 diabetes	rs6058106	20	33278255	C	7.0684e-05	0.68145	0.367105	0.8973	0.994064	1.01
type 2 diabetes	rs9574	20	33764632	G	-6.8437e-05	0.68187	0.437522	0.5601	0.999493	0.989
type 2 diabetes	rs2069948	20	33762489	T	-6.8361e-05	0.68224	0.437225	0.6297	0.999191	0.989
type 2 diabetes	rs1984588	20	33435874	C	6.9912e-05	0.68276	0.377392	0.9797	0.995584	1.01
type 2 diabetes	rs6059987	20	33277731	A	7.0259e-05	0.68335	0.366745	0.8915	0.994106	1.01
type 2 diabetes	rs4911166	20	33573377	A	6.9223e-05	0.68356	0.390512	0.4627	0.998546	1.01
type 2 diabetes	rs6058150	20	33556817	T	7.1461e-05	0.68412	0.33446	0.5451	0.996537	1.01
type 2 diabetes	rs6088760	20	33773266	C	7.4486e-05	0.68413	0.287361	0.7359	0.998547	1.01
type 2 diabetes	rs6088577	20	33281562	G	6.9769e-05	0.68539	0.366775	0.9618	0.994432	1.01
type 2 diabetes	rs6142222	20	33281736	T	6.96e-05	0.68611	0.366783	0.9501	0.994436	1.01
type 2 diabetes	rs3746428	20	33719183	A	-9.032e-05	0.68678	0.164082	0.7498	0.993758	0.986
type 2 diabetes	rs1998231	20	33598419	T	6.8506e-05	0.68686	0.388235	0.4361	0.999922	1.01
type 2 diabetes	rs945960	20	33762854	G	-6.7122e-05	0.6877	0.437241	0.5484	0.999351	0.989
type 2 diabetes	rs1415774	20	33765616	G	-6.6949e-05	0.68852	0.43764	0.5812	0.998722	0.99
type 2 diabetes	rs2069952	20	33763951	T	-6.6676e-05	0.68963	0.437426	0.598	0.99941	0.99
type 2 diabetes	rs1407203	20	33651979	T	6.7824e-05	0.69001	0.388495	0.4214	0.998233	1.01
type 2 diabetes	rs3761143	20	33545745	T	6.7048e-05	0.69255	0.395826	0.8247	0.995806	1.01
type 2 diabetes	rs111360968	20	33495069	T	0.00020467	0.69291	0.0261875	0.1777	0.999481	1.03
type 2 diabetes	rs3787212	20	33545540	A	6.9244e-05	0.69349	0.334139	0.5708	0.99632	1.01
type 2 diabetes	rs6088758	20	33769203	G	-6.5739e-05	0.69375	0.437411	0.598	0.999468	0.99
type 2 diabetes	rs2069943	20	33761408	C	-6.572e-05	0.69392	0.437164	0.6297	0.998999	0.99
type 2 diabetes	rs6141504	20	33281651	G	6.7581e-05	0.69474	0.366864	0.953	0.994291	1.01
type 2 diabetes	rs633198	20	33778434	C	6.5567e-05	0.69476	0.438413	0.6323	0.996697	1.01
type 2 diabetes	rs6088578	20	33281604	T	6.751e-05	0.69505	0.366866	0.956	0.994297	1.01
type 2 diabetes	rs1555322	20	33849179	G	9.3721e-05	0.69944	0.1345	0.9011	genotyped	1.01
type 2 diabetes	rs4911154	20	32996101	A	-7.8849e-05	0.70163	0.203464	0.5211	0.998114	0.988
type 2 diabetes	rs6087683	20	33774444	T	-6.3924e-05	0.70171	0.438488	0.6398	0.999375	0.99
type 2 diabetes	rs13038162	20	33678071	T	6.4595e-05	0.70436	0.389005	0.4704	0.995426	1.01
type 2 diabetes	rs6060216	20	33678078	C	6.4407e-05	0.70517	0.388988	0.4704	0.995495	1.01
type 2 diabetes	rs635279	20	33778882	T	6.3121e-05	0.70577	0.437901	0.6697	0.995769	1.01
type 2 diabetes	rs1001425	20	33153150	C	6.6133e-05	0.70785	0.351688	0.2073	0.964593	1.01
type 2 diabetes	rs3746448	20	33572979	T	-8.2966e-05	0.7105	0.164223	0.7044	0.997878	0.987
type 2 diabetes	rs6058202	20	33777983	G	-6.1973e-05	0.71066	0.438005	0.6596	0.997468	0.99
type 2 diabetes	rs6059909	20	33139691	A	6.1576e-05	0.71143	0.486502	0.6002	0.990408	1.01
type 2 diabetes	rs6060303	20	33785956	G	-6.6809e-05	0.71607	0.287433	0.7675	0.990949	0.99
type 2 diabetes	rs7269526	20	33053293	C	-7.4554e-05	0.71725	0.203257	0.4711	0.998702	0.988
type 2 diabetes	rs6088753	20	33768252	T	-6.0212e-05	0.71825	0.440259	0.5865	0.998529	0.991
type 2 diabetes	rs2065979	20	33767690	C	-6.0291e-05	0.71842	0.439418	0.6048	0.995411	0.991
type 2 diabetes	rs6060163	20	33611738	C	6.4935e-05	0.71874	0.302138	0.2122	0.99948	1.01
type 2 diabetes	rs6060159	20	33610546	G	6.4853e-05	0.71908	0.302142	0.2122	0.999419	1.01
type 2 diabetes	rs7268701	20	32901960	T	6.0862e-05	0.71999	0.441511	0.2835	0.962227	1.01
type 2 diabetes	rs4911472	20	33775377	A	-5.9827e-05	0.72005	0.438002	0.6672	0.99918	0.991
type 2 diabetes	rs6088570	20	33268295	C	6.1468e-05	0.72039	0.370041	0.5931	0.997239	1.01
type 2 diabetes	rs2889855	20	33276853	C	6.1365e-05	0.72109	0.370119	0.6971	0.994929	1.01
type 2 diabetes	rs4911437	20	33266149	T	6.1106e-05	0.72198	0.369524	0.5482	0.998199	1.01
type 2 diabetes	rs6088575	20	33273403	G	6.1147e-05	0.72203	0.369754	0.5803	0.995214	1.01
type 2 diabetes	rs41287074	20	33502809	A	-0.00018408	0.72229	0.02624	0.2669	genotyped	0.971
type 2 diabetes	rs6060194	20	33649930	C	6.4019e-05	0.72256	0.302236	0.1992	0.999277	1.01
type 2 diabetes	rs2378251	20	33276750	A	6.1e-05	0.72273	0.370001	0.6596	0.994502	1.01
type 2 diabetes	rs6088515	20	33110042	A	7.2876e-05	0.72288	0.203954	0.4952	0.999403	1.01
type 2 diabetes	rs6141503	20	33274469	A	6.0731e-05	0.72377	0.370122	0.6495	0.995765	1.01
type 2 diabetes	rs6088618	20	33409350	A	5.8952e-05	0.72392	0.437675	0.2583	0.9982	1.01
type 2 diabetes	rs113299530	20	33236517	A	0.00018753	0.72409	0.0256533	0.2218	0.969501	1.03
type 2 diabetes	rs2281695	20	33129164	C	7.2598e-05	0.72429	0.204349	0.5213	0.994631	1.01
type 2 diabetes	rs112171725	20	33442047	G	0.00012753	0.72496	0.05536	0.8585	genotyped	1.02
type 2 diabetes	rs6087614	20	33262874	C	6.0018e-05	0.72669	0.36957	0.5531	0.998515	1.01
type 2 diabetes	rs2424999	20	33386430	A	5.9466e-05	0.72848	0.377224	0.6999	0.993514	1.01
type 2 diabetes	rs2378250	20	33275529	G	5.9573e-05	0.7289	0.370207	0.6812	0.994805	1.01
type 2 diabetes	rs6088568	20	33265971	C	5.9452e-05	0.72918	0.369776	0.563	0.997761	1.01
type 2 diabetes	rs4263187	20	33773283	C	-5.7701e-05	0.72956	0.438061	0.6697	0.999496	0.991
type 2 diabetes	rs1853057	20	33262113	G	5.9333e-05	0.72965	0.36987	0.5704	0.997995	1.01
type 2 diabetes	rs3761142	20	33545816	T	6.0693e-05	0.7297	0.334435	0.5631	0.996282	1.01
type 2 diabetes	rs1321306	20	33266379	A	5.9256e-05	0.73005	0.369784	0.563	0.997629	1.01
type 2 diabetes	rs6088567	20	33263872	T	5.878e-05	0.73208	0.369803	0.5704	0.998005	1.01
type 2 diabetes	rs1853056	20	33262058	T	5.8743e-05	0.73218	0.370186	0.5656	0.998401	1.01
type 2 diabetes	rs4911162	20	33411425	C	5.8307e-05	0.73276	0.379159	0.8619	0.997815	1.01
type 2 diabetes	rs1122174	20	33110846	C	7.0163e-05	0.73283	0.20388	0.5185	0.999431	1.01
type 2 diabetes	rs11167241	20	33250835	T	5.8548e-05	0.73304	0.369908	0.563	0.998456	1.01
type 2 diabetes	rs6087615	20	33262984	A	5.8375e-05	0.73385	0.369826	0.568	0.998038	1.01
type 2 diabetes	rs2253484	20	33405263	T	5.7887e-05	0.73435	0.379369	0.7747	0.999515	1.01
type 2 diabetes	rs2425008	20	33574022	C	5.7359e-05	0.7354	0.391195	0.4566	0.999254	1.01
type 2 diabetes	rs6087634	20	33413809	A	5.7682e-05	0.73553	0.379352	0.7775	0.997527	1.01
type 2 diabetes	rs6119558	20	33574493	C	5.7312e-05	0.7356	0.391161	0.448	0.999558	1.01
type 2 diabetes	rs11696548	20	33859675	T	-7.794e-05	0.73748	0.152622	0.6823	0.97898	0.988
type 2 diabetes	rs7262274	20	33413176	C	5.7036e-05	0.73839	0.379091	0.7914	0.997627	1.01
type 2 diabetes	rs4602286	20	33772707	T	-5.556e-05	0.73914	0.440948	0.6476	0.998455	0.991
type 2 diabetes	rs11167239	20	33140472	A	5.504e-05	0.74051	0.48571	0.6292	0.993389	1.01
type 2 diabetes	rs1885118	20	33567860	C	5.5906e-05	0.7419	0.391009	0.4458	0.999432	1.01
type 2 diabetes	rs2425018	20	33818766	A	-7.8806e-05	0.74201	0.139573	0.6856	0.994119	0.988
type 2 diabetes	rs6058120	20	33402829	G	5.591e-05	0.74316	0.379146	0.842	0.999382	1.01
type 2 diabetes	rs6088569	20	33268199	A	5.6172e-05	0.74361	0.369964	0.6057	0.997028	1.01
type 2 diabetes	rs6120739	20	33405227	G	5.5716e-05	0.74396	0.379304	0.7747	0.999905	1.01
type 2 diabetes	rs6059913	20	33143288	A	5.3994e-05	0.74522	0.485679	0.6195	0.99385	1.01
type 2 diabetes	rs6060301	20	33783242	T	-5.9633e-05	0.74544	0.287338	0.7485	0.990915	0.991
type 2 diabetes	rs6119529	20	33401059	G	5.5233e-05	0.74652	0.37734	0.6737	0.998475	1.01
type 2 diabetes	rs6087633	20	33408137	G	5.507e-05	0.74698	0.379196	0.7858	0.998511	1.01
type 2 diabetes	rs6060064	20	33406339	G	5.248e-05	0.75841	0.379188	0.783	0.999555	1.01
type 2 diabetes	rs4911161	20	33402231	T	5.2256e-05	0.75938	0.379275	0.7719	0.999731	1.01
type 2 diabetes	rs6142216	20	33256036	A	5.2385e-05	0.76002	0.371242	0.6089	0.998678	1.01
type 2 diabetes	rs632688	20	33778287	C	-5.7047e-05	0.76091	0.267398	0.8277	0.994685	0.991
type 2 diabetes	rs4911474	20	33780297	G	-5.5881e-05	0.76094	0.286831	0.7514	0.992262	0.991
type 2 diabetes	rs2425005	20	33407715	C	5.1318e-05	0.76371	0.379005	0.7774	0.998221	1.01
type 2 diabetes	rs6120675	20	33138870	C	4.9786e-05	0.76439	0.486867	0.6965	0.993998	1.01
type 2 diabetes	rs1018447	20	33401707	A	5.0861e-05	0.76561	0.379277	0.7831	0.999759	1.01
type 2 diabetes	rs6088565	20	33254986	C	5.0805e-05	0.76707	0.370956	0.566	0.999149	1.01
type 2 diabetes	rs6060299	20	33780508	G	-5.4371e-05	0.76722	0.286877	0.7737	0.99185	0.991
type 2 diabetes	rs6060135	20	33563936	G	4.9743e-05	0.76731	0.416996	0.3959	0.997518	1.01
type 2 diabetes	rs58084442	20	33807521	C	-7.1394e-05	0.76734	0.137311	0.6551	0.99106	0.989
type 2 diabetes	rs10211823	20	33808270	C	-7.1274e-05	0.76772	0.137304	0.584	0.991083	0.989
type 2 diabetes	rs6060305	20	33788582	G	-5.3869e-05	0.76947	0.286969	0.7705	0.989909	0.992
type 2 diabetes	rs6059918	20	33150503	T	4.8496e-05	0.77019	0.48687	0.7374	0.995191	1.01
type 2 diabetes	rs7274854	20	33228672	A	4.9848e-05	0.77125	0.371258	0.5911	0.999329	1.01
type 2 diabetes	rs2425016	20	33807249	G	-7.0006e-05	0.77176	0.137293	0.6448	0.990949	0.989
type 2 diabetes	rs6142219	20	33256345	A	4.9143e-05	0.77447	0.371191	0.5987	0.998622	1.01
type 2 diabetes	rs6088564	20	33249444	G	4.9076e-05	0.77473	0.37121	0.581	0.999013	1.01
type 2 diabetes	rs13042351	20	33238573	A	4.8913e-05	0.77542	0.371265	0.5936	0.999411	1.01
type 2 diabetes	rs6060003	20	33294945	T	-4.6722e-05	0.77928	0.4473	0.8331	genotyped	0.993
type 2 diabetes	rs6060313	20	33810869	T	-6.7404e-05	0.77998	0.137186	0.6238	0.992295	0.989
type 2 diabetes	rs41290906	20	33645273	A	-0.00010311	0.78029	0.0545957	0.7312	0.971673	0.984
type 2 diabetes	rs1415775	20	33765771	C	-5.1118e-05	0.78114	0.2871	0.001419	genotyped	0.992
type 2 diabetes	rs56289635	20	33730759	A	6.7106e-05	0.78168	0.142909	0.1712	0.949646	1.01
type 2 diabetes	rs4911158	20	33239512	T	-4.7527e-05	0.78201	0.3717	0.1445	genotyped	0.993
type 2 diabetes	rs6060304	20	33788350	T	-5.0795e-05	0.78224	0.286971	0.742	0.990623	0.992
type 2 diabetes	rs6088561	20	33228871	C	4.7212e-05	0.78304	0.371182	0.5785	0.999223	1.01
type 2 diabetes	rs6088662	20	33547633	G	5.8359e-05	0.78368	0.186657	0.3667	0.997028	1.01
type 2 diabetes	rs6088552	20	33226491	G	4.7062e-05	0.78374	0.371014	0.5835	0.999199	1.01
type 2 diabetes	rs6088560	20	33228549	C	4.702e-05	0.78391	0.371164	0.576	0.999178	1.01
type 2 diabetes	rs6142212	20	33226971	T	4.6996e-05	0.78403	0.371014	0.581	0.999198	1.01
type 2 diabetes	rs2247828	20	33839939	G	-6.5832e-05	0.78404	0.138309	0.5047	0.994236	0.99
type 2 diabetes	rs7269596	20	33229063	C	4.6827e-05	0.78479	0.371013	0.581	0.999196	1.01
type 2 diabetes	rs6087600	20	33157217	C	4.5175e-05	0.78552	0.485669	0.6394	0.995704	1.01
type 2 diabetes	rs6087612	20	33230822	G	4.6639e-05	0.78561	0.371182	0.5886	0.999248	1.01
type 2 diabetes	rs6088527	20	33155841	T	4.4942e-05	0.7866	0.485678	0.6443	0.995702	1.01
type 2 diabetes	rs2224320	20	33791590	C	-4.9868e-05	0.78668	0.286751	0.7953	0.985549	0.992
type 2 diabetes	rs6142210	20	33223012	T	4.6404e-05	0.78672	0.370946	0.5685	0.998928	1.01
type 2 diabetes	rs61341205	20	33072578	A	5.5851e-05	0.78691	0.2042	0.0002675	genotyped	1.01
type 2 diabetes	rs1415772	20	33765583	G	5.0669e-05	0.78696	0.267443	0.7377	0.995021	1.01
type 2 diabetes	rs764597	20	33161225	A	4.4836e-05	0.78709	0.485678	0.6369	0.995761	1.01
type 2 diabetes	rs79084221	20	32463452	G	-0.000102	0.79053	0.0516971	0.5758	0.946847	0.984
type 2 diabetes	rs1884669	20	33171287	A	4.4074e-05	0.79061	0.485738	0.6296	0.995829	1.01
type 2 diabetes	rs2295444	20	33173883	T	4.3692e-05	0.79239	0.485762	0.6127	0.995834	1.01
type 2 diabetes	rs2889861	20	33405664	T	4.4918e-05	0.79255	0.3794	0.7333	genotyped	1.01
type 2 diabetes	rs6142147	20	32953344	G	4.707e-05	0.79429	0.302506	0.1981	0.998523	1.01
type 2 diabetes	rs6088528	20	33156742	A	4.307e-05	0.79531	0.485807	0.6442	0.995157	1.01
type 2 diabetes	rs6088771	20	33810692	C	-6.2859e-05	0.79543	0.136797	0.8009	0.985757	0.99
type 2 diabetes	rs6142152	20	32960877	A	4.6622e-05	0.79624	0.302481	0.201	0.998034	1.01
type 2 diabetes	rs6059926	20	33164804	T	4.2861e-05	0.79625	0.485778	0.674	0.995759	1.01
type 2 diabetes	rs6579218	20	33709846	C	4.6333e-05	0.79754	0.300862	0.198	0.998788	1.01
type 2 diabetes	rs13041792	20	33545055	A	5.3363e-05	0.80189	0.186428	0.326	0.996853	1.01
type 2 diabetes	rs73105035	20	33171411	T	0.00012704	0.80767	0.0261298	0.2339	0.987143	1.02
type 2 diabetes	rs6088485	20	32985992	T	4.3755e-05	0.80845	0.302835	0.2158	0.997876	1.01
type 2 diabetes	rs11698868	20	33549946	T	5.103e-05	0.81035	0.186368	0.3573	0.997626	1.01
type 2 diabetes	rs1998233	20	33657126	A	4.3382e-05	0.81038	0.3069	4.612e-07	genotyped	1.01
type 2 diabetes	rs35556948	20	33881187	C	-7.4636e-05	0.81145	0.0782431	0.2492	0.966668	0.988
type 2 diabetes	rs6060307	20	33792932	C	-4.3919e-05	0.81181	0.286567	0.8499	0.983151	0.993
type 2 diabetes	rs72497006	20	32909056	A	4.2639e-05	0.81367	0.302752	0.1967	0.993429	1.01
type 2 diabetes	rs78594636	20	32588955	G	-0.00012759	0.81486	0.02368	0.9113	genotyped	0.98
type 2 diabetes	rs6120772	20	33554761	T	4.9643e-05	0.8154	0.186245	0.3397	0.99832	1.01
type 2 diabetes	rs6119593	20	33833729	C	5.5708e-05	0.81609	0.1396	0.4477	genotyped	1.01
type 2 diabetes	rs6141513	20	33374402	C	-3.9637e-05	0.81639	0.379133	0.7773	0.998337	0.994
type 2 diabetes	rs1205340	20	32923871	A	-3.8092e-05	0.81872	0.496008	0.7118	0.992426	0.994
type 2 diabetes	rs6120775	20	33557564	C	4.8434e-05	0.81979	0.186265	0.3631	0.998555	1.01
type 2 diabetes	rs2295886	20	33713975	C	-4.0694e-05	0.8198	0.3195	0.0002578	genotyped	0.994
type 2 diabetes	rs6059938	20	33187130	A	3.7773e-05	0.82001	0.48275	0.4939	0.996304	1.01
type 2 diabetes	rs6060255	20	33717987	C	4.0834e-05	0.82197	0.297645	0.1467	0.995038	1.01
type 2 diabetes	rs6088466	20	32913534	A	4.0563e-05	0.82245	0.303065	0.1765	0.994651	1.01
type 2 diabetes	rs6142129	20	32819871	G	3.9872e-05	0.82253	0.320377	0.8538	0.996431	1.01
type 2 diabetes	rs6087605	20	33180624	T	3.7095e-05	0.82318	0.482677	0.5312	0.996271	1.01
type 2 diabetes	rs6088525	20	33141272	C	3.9175e-05	0.82435	0.332949	0.5247	0.990377	1.01
type 2 diabetes	rs6088536	20	33189106	C	3.6843e-05	0.82437	0.482728	0.4896	0.996292	1.01
type 2 diabetes	rs6058084	20	33183804	T	3.6645e-05	0.8253	0.482691	0.5245	0.996215	1.01
type 2 diabetes	rs6058165	20	33640840	T	3.9489e-05	0.82621	0.305171	0.259	0.999344	1.01
type 2 diabetes	rs2424993	20	33104592	C	-3.9359e-05	0.82764	0.3019	0.02554	genotyped	0.994
type 2 diabetes	rs1535466	20	33718706	A	3.9403e-05	0.82816	0.297478	0.1616	0.99462	1.01
type 2 diabetes	rs6059932	20	33175466	T	3.5832e-05	0.82913	0.482864	0.5562	0.995935	1.01
type 2 diabetes	rs111691147	20	33177202	C	0.00011224	0.82947	0.0262162	0.249	0.986807	1.02
type 2 diabetes	rs1205336	20	32926336	A	-3.5707e-05	0.82983	0.496187	0.7118	0.993287	0.994
type 2 diabetes	rs4911464	20	33659122	A	3.8266e-05	0.83148	0.305076	0.2474	0.999769	1.01
type 2 diabetes	rs6060201	20	33655813	G	3.8137e-05	0.83205	0.305074	0.2409	0.999759	1.01
type 2 diabetes	rs2180850	20	33655308	C	3.811e-05	0.83216	0.305072	0.2425	0.999757	1.01
type 2 diabetes	rs6060253	20	33716263	G	3.8349e-05	0.83256	0.303711	0.1648	0.983712	1.01
type 2 diabetes	rs6142300	20	33705708	C	-3.75e-05	0.83295	0.318769	0.2753	0.99897	0.994
type 2 diabetes	rs17092378	20	33736188	T	3.9507e-05	0.83321	0.264952	0.5316	0.999088	1.01
type 2 diabetes	rs2295885	20	33713963	C	-3.7209e-05	0.83428	0.318493	0.284	0.998869	0.994
type 2 diabetes	rs6058192	20	33734261	G	3.9237e-05	0.83434	0.264904	0.546	0.999165	1.01
type 2 diabetes	rs6088722	20	33706187	C	-3.7176e-05	0.83436	0.318765	0.2719	0.999103	0.994
type 2 diabetes	rs6060196	20	33653617	G	3.7502e-05	0.8348	0.305096	0.2442	0.999697	1.01
type 2 diabetes	rs2050652	20	33733180	G	-3.9214e-05	0.83519	0.2639	0.05367	genotyped	0.994
type 2 diabetes	rs2064705	20	33031276	C	-3.754e-05	0.83531	0.302527	0.1778	0.998048	0.994
type 2 diabetes	rs959829	20	33346047	C	-3.5383e-05	0.83583	0.378983	0.7606	0.997926	0.994
type 2 diabetes	rs6088523	20	33135550	G	3.6597e-05	0.83585	0.331973	0.5046	0.990274	1.01
type 2 diabetes	rs6060193	20	33648433	T	3.7202e-05	0.8361	0.305042	0.2642	0.999811	1.01
type 2 diabetes	rs6142154	20	32970673	T	3.7335e-05	0.83618	0.302474	0.1871	0.998287	1.01
type 2 diabetes	rs2180849	20	33648239	A	3.7184e-05	0.83618	0.305042	0.2659	0.999817	1.01
type 2 diabetes	rs11167234	20	32983619	A	3.7173e-05	0.83687	0.302494	0.183	0.997543	1.01
type 2 diabetes	rs13042965	20	32774089	A	4.4583e-05	0.83702	0.188115	0.8409	0.955265	1.01
type 2 diabetes	rs2180848	20	33619111	G	3.6969e-05	0.8371	0.305031	0.2764	0.999889	1.01
type 2 diabetes	rs6060321	20	33833781	A	-4.8501e-05	0.83728	0.143399	0.5014	0.998202	0.992
type 2 diabetes	rs6060156	20	33610145	G	3.6797e-05	0.83785	0.305145	0.2873	0.999636	1.01
type 2 diabetes	rs1884667	20	33285505	A	-3.3996e-05	0.83827	0.452209	0.4993	0.995704	0.995
type 2 diabetes	rs6120810	20	33626249	G	3.6683e-05	0.83835	0.30502	0.2746	0.999957	1.01
type 2 diabetes	rs6060243	20	33698119	C	-3.6247e-05	0.83862	0.31898	0.2957	0.996362	0.994
type 2 diabetes	rs6060173	20	33629082	T	3.6575e-05	0.83882	0.305017	0.2746	0.999953	1.01
type 2 diabetes	rs2425014	20	33583114	C	3.6528e-05	0.83907	0.304955	0.3131	0.999231	1.01
type 2 diabetes	rs3746430	20	33593674	C	3.6446e-05	0.83938	0.305019	0.2694	0.999912	1.01
type 2 diabetes	rs4142034	20	33643256	G	3.6435e-05	0.83943	0.305015	0.2676	0.999956	1.01
type 2 diabetes	rs1884668	20	33285514	G	-3.3751e-05	0.83944	0.45214	0.4905	0.995582	0.995
type 2 diabetes	rs4142007	20	32990050	T	-3.3526e-05	0.83975	0.494425	0.7586	0.997736	0.995
type 2 diabetes	rs1998232	20	33601959	G	3.6358e-05	0.83976	0.305015	0.2711	0.999944	1.01
type 2 diabetes	rs2425017	20	33817638	C	-4.7216e-05	0.83987	0.148319	0.8342	0.992212	0.993
type 2 diabetes	rs6087598	20	33140934	A	3.5587e-05	0.8402	0.332147	0.4972	0.991722	1.01
type 2 diabetes	rs6060154	20	33599601	C	3.6247e-05	0.84024	0.305029	0.2694	0.999883	1.01
type 2 diabetes	rs6058179	20	33689328	G	-3.5858e-05	0.84025	0.31889	0.2855	0.997507	0.994
type 2 diabetes	rs2152918	20	33740209	G	3.7629e-05	0.84109	0.264911	0.5518	0.998484	1.01
type 2 diabetes	rs6059991	20	33280836	T	-3.3322e-05	0.84153	0.451849	0.4155	0.994513	0.995
type 2 diabetes	rs6088580	20	33285053	C	-3.3222e-05	0.84191	0.452179	0.4883	0.995727	0.995
type 2 diabetes	rs7271970	20	32987666	G	-3.2997e-05	0.84222	0.49449	0.7638	0.998345	0.995
type 2 diabetes	rs6119559	20	33601601	G	3.5774e-05	0.84227	0.305181	0.2891	0.999539	1.01
type 2 diabetes	rs6060218	20	33678636	C	3.5665e-05	0.84321	0.3047	0.01631	genotyped	1.01
type 2 diabetes	rs6060217	20	33678134	G	3.5389e-05	0.8441	0.305453	0.2473	0.997368	1.01
type 2 diabetes	rs62212172	20	32987705	A	-3.2435e-05	0.84487	0.494521	0.7431	0.998165	0.995
type 2 diabetes	rs1205344	20	32918298	A	-3.2229e-05	0.84598	0.491698	0.7847	0.995864	0.995
type 2 diabetes	rs2295352	20	33320055	G	-3.3159e-05	0.84602	0.378589	0.7141	0.998281	0.995
type 2 diabetes	rs12480410	20	32988678	T	-3.1812e-05	0.84782	0.494503	0.7482	0.998296	0.995
type 2 diabetes	rs73097037	20	32974167	C	6.5511e-05	0.84842	0.0644463	0.3185	0.965167	1.01
type 2 diabetes	rs1569780	20	33429907	C	3.2618e-05	0.84847	0.395281	0.9139	0.983867	1.01
type 2 diabetes	rs6060250	20	33704108	C	-3.394e-05	0.8487	0.318787	0.2853	0.997587	0.995
type 2 diabetes	rs6119548	20	33552612	G	4.0013e-05	0.85076	0.186249	0.3601	0.998072	1.01
type 2 diabetes	rs6058186	20	33701835	G	-3.3392e-05	0.85107	0.318858	0.2997	0.997994	0.995
type 2 diabetes	rs6058184	20	33701483	C	-3.3321e-05	0.85139	0.318861	0.2979	0.997996	0.995
type 2 diabetes	rs6059956	20	33220070	C	3.0843e-05	0.85237	0.484625	0.6943	0.999177	1
type 2 diabetes	rs6120827	20	33672123	T	3.3023e-05	0.85435	0.304589	0.2605	0.99986	1.01
type 2 diabetes	rs6087567	20	32825638	T	-3.2065e-05	0.85709	0.3202	0.08403	genotyped	0.995
type 2 diabetes	rs6141479	20	33121942	C	-3.7372e-05	0.86171	0.18716	0.09311	0.979092	0.994
type 2 diabetes	rs2425021	20	33829778	C	-4.0214e-05	0.86173	0.151979	0.9422	0.996079	0.994
type 2 diabetes	rs671988	20	33837414	T	-4.1839e-05	0.86178	0.137898	0.5955	0.996407	0.993
type 2 diabetes	rs6087663	20	33625526	G	3.1326e-05	0.86279	0.3048	0.001121	genotyped	1
type 2 diabetes	rs3053708	20	33575347	CAT	3.0855e-05	0.86491	0.3028	4.567e-09	genotyped	1
type 2 diabetes	rs2425020	20	33823832	C	-3.2693e-05	0.86642	0.256598	0.5811	0.947959	0.995
type 2 diabetes	rs6060204	20	33658423	G	2.986e-05	0.86815	0.304806	0.2556	0.999872	1
type 2 diabetes	rs2057323	20	33656560	T	2.9825e-05	0.8683	0.304806	0.2539	0.999881	1
type 2 diabetes	rs6059992	20	33282275	C	-2.7523e-05	0.8688	0.452218	0.5101	0.994883	0.996
type 2 diabetes	rs6142291	20	33664887	C	2.9688e-05	0.8689	0.304799	0.2572	0.99987	1
type 2 diabetes	rs752449	20	33592474	G	2.9219e-05	0.87098	0.304665	0.278	0.999529	1
type 2 diabetes	rs17092414	20	33777756	T	6.023e-05	0.87158	0.052434	0.1998	0.988993	1.01
type 2 diabetes	rs73106933	20	33287425	C	-2.6925e-05	0.87178	0.451384	0.6095	0.992839	0.996
type 2 diabetes	rs6058177	20	33676917	C	2.8988e-05	0.872	0.304658	0.2673	0.999413	1
type 2 diabetes	rs6142272	20	33613371	G	2.8525e-05	0.87398	0.304762	0.287	0.999798	1
type 2 diabetes	rs2425009	20	33578899	C	2.8354e-05	0.87476	0.304638	0.3408	0.99957	1
type 2 diabetes	rs6088677	20	33607464	T	2.834e-05	0.87479	0.304751	0.2888	0.999805	1
type 2 diabetes	rs4911465	20	33670856	A	2.8246e-05	0.87519	0.305179	0.2394	0.999522	1
type 2 diabetes	rs6060143	20	33579073	C	2.8198e-05	0.87544	0.304634	0.3368	0.999576	1
type 2 diabetes	rs6060180	20	33638013	G	2.8089e-05	0.8759	0.304749	0.278	0.999924	1
type 2 diabetes	rs2295701	20	33596117	C	2.8045e-05	0.87609	0.304748	0.2798	0.999835	1
type 2 diabetes	rs6088693	20	33640342	G	2.8006e-05	0.87626	0.304745	0.278	0.99993	1
type 2 diabetes	rs2281626	20	33637606	G	2.7828e-05	0.87704	0.304739	0.2744	0.999919	1
type 2 diabetes	rs79566357	20	33782642	C	-5.7684e-05	0.87721	0.05178	0.2104	genotyped	0.991
type 2 diabetes	rs6058064	20	33086622	G	2.5603e-05	0.87731	0.49279	0.7301	0.997714	1
type 2 diabetes	rs6058070	20	33103521	C	2.4185e-05	0.88393	0.493639	0.79	0.999366	1
type 2 diabetes	rs6059989	20	33279604	G	-2.4255e-05	0.88428	0.451678	0.4355	0.994878	0.996
type 2 diabetes	rs6088512	20	33095891	A	2.408e-05	0.88445	0.493526	0.7795	0.999046	1
type 2 diabetes	rs6059896	20	33111783	C	2.4063e-05	0.88454	0.493567	0.7717	0.998892	1
type 2 diabetes	rs666210	20	33723810	C	-2.6836e-05	0.88682	0.262183	0.5164	0.995753	0.996
type 2 diabetes	rs6579186	20	33282198	C	-2.3445e-05	0.88811	0.451942	0.528	0.994993	0.996
type 2 diabetes	rs6059844	20	33036482	A	-2.3216e-05	0.88889	0.4949	0.03668	genotyped	0.996
type 2 diabetes	rs73105013	20	33144812	C	4.8507e-05	0.8893	0.0629078	0.9515	0.952627	1.01
type 2 diabetes	rs6059867	20	33078103	T	2.2687e-05	0.89107	0.493659	0.7561	0.999361	1
type 2 diabetes	rs6059875	20	33086090	G	2.2574e-05	0.89161	0.493655	0.7509	0.999403	1
type 2 diabetes	rs1205334	20	32930369	C	2.1793e-05	0.89539	0.490224	0.9456	0.997995	1
type 2 diabetes	rs6087588	20	33066369	C	2.1713e-05	0.89573	0.493689	0.7277	0.99963	1
type 2 diabetes	rs1205338	20	32925625	G	2.1087e-05	0.89877	0.49028	0.9022	0.997603	1
type 2 diabetes	rs6088471	20	32932643	A	2.0981e-05	0.89923	0.49069	0.8914	0.99896	1
type 2 diabetes	rs8115656	20	33282780	C	-2.0688e-05	0.90125	0.451292	0.5234	0.994312	0.997
type 2 diabetes	rs6142209	20	33220984	T	-2.1812e-05	0.90133	0.3366	0.07358	genotyped	0.997
type 2 diabetes	rs4911151	20	32932273	C	2.0516e-05	0.90145	0.490651	0.8941	0.999	1
type 2 diabetes	rs2378334	20	33716739	T	2.231e-05	0.9022	0.302518	0.1713	0.983983	1
type 2 diabetes	rs3746436	20	33586193	C	-2.6439e-05	0.90272	0.1785	0.5833	genotyped	0.996
type 2 diabetes	rs2378134	20	32938085	T	2.0068e-05	0.9036	0.490687	0.8779	0.998767	1
type 2 diabetes	rs1205337	20	32926041	A	1.9992e-05	0.90401	0.490297	0.8886	0.99765	1
type 2 diabetes	rs6059988	20	33278101	C	-1.98e-05	0.90543	0.451487	0.5314	0.994957	0.997
type 2 diabetes	rs6120825	20	33671141	C	2.5396e-05	0.90593	0.185746	0.5469	0.979315	1
type 2 diabetes	rs11699564	20	33021940	C	-3.4063e-05	0.90676	0.08989	0.7623	0.990043	0.995
type 2 diabetes	rs13040777	20	33286908	A	-1.9381e-05	0.90741	0.451862	0.5836	0.995132	0.997
type 2 diabetes	rs6087659	20	33606383	A	2.497e-05	0.90799	0.179562	0.576	0.995182	1
type 2 diabetes	rs647515	20	33727050	G	-2.1678e-05	0.90842	0.262274	0.5337	0.996569	0.997
type 2 diabetes	rs55829662	20	33731625	C	2.1613e-05	0.90854	0.26254	0.5036	0.999375	1
type 2 diabetes	rs13043505	20	32946905	T	1.8981e-05	0.90894	0.491378	0.9864	0.995649	1
type 2 diabetes	rs1015363	20	32738335	A	1.8847e-05	0.9099	0.465308	0.2703	0.993051	1
type 2 diabetes	rs11700080	20	33046761	G	-3.271e-05	0.91045	0.0898452	0.7862	0.990358	0.995
type 2 diabetes	rs9789792	20	32957709	A	1.8494e-05	0.91109	0.491184	0.9973	0.999312	1
type 2 diabetes	rs4911456	20	33573500	A	1.9954e-05	0.91141	0.308205	0.299	0.998642	1
type 2 diabetes	rs6088532	20	33178782	G	1.9213e-05	0.91279	0.338444	0.36	0.994994	1
type 2 diabetes	rs6058052	20	33047084	G	1.8102e-05	0.913	0.493709	0.6871	0.999641	1
type 2 diabetes	rs6088502	20	33037644	T	1.7785e-05	0.9145	0.493646	0.6972	0.999666	1
type 2 diabetes	rs2425007	20	33572941	G	1.9247e-05	0.91453	0.30812	0.2844	0.999438	1
type 2 diabetes	rs6058105	20	33271719	T	-1.7839e-05	0.91471	0.451579	0.6666	0.996566	0.997
type 2 diabetes	rs4258875	20	32924895	A	1.6985e-05	0.9184	0.490313	0.9103	0.997439	1
type 2 diabetes	rs6087666	20	33640242	G	-2.1963e-05	0.91913	0.1787	0.5287	genotyped	0.997
type 2 diabetes	rs6059856	20	33057954	C	1.6728e-05	0.91957	0.49367	0.6921	0.999587	1
type 2 diabetes	rs8117173	20	32930016	A	-2.1717e-05	0.92072	0.183235	0.1075	0.962009	0.997
type 2 diabetes	rs6087657	20	33564689	A	-1.7763e-05	0.92109	0.308068	0.2808	0.999952	0.997
type 2 diabetes	rs1205347	20	32912050	T	-1.6151e-05	0.92245	0.492749	0.7021	0.996221	0.997
type 2 diabetes	rs1205341	20	32923476	C	1.5965e-05	0.92329	0.489973	0.9238	0.997114	1
type 2 diabetes	rs6087580	20	32992592	G	1.5946e-05	0.92333	0.490618	0.932	0.998595	1
type 2 diabetes	rs34337249	20	33642042	A	2.7291e-05	0.92392	0.0946826	0.8104	0.976366	1
type 2 diabetes	rs6141465	20	32967314	C	-1.5581e-05	0.92507	0.49372	0.7354	0.999315	0.998
type 2 diabetes	rs6058041	20	33018008	G	1.5241e-05	0.9267	0.49378	0.6821	0.999731	1
type 2 diabetes	rs3746455	20	32957216	A	1.519e-05	0.92693	0.490568	0.97	0.999649	1
type 2 diabetes	rs7271144	20	32948885	C	-1.5025e-05	0.92775	0.492616	0.6997	0.998958	0.998
type 2 diabetes	rs6120826	20	33671831	A	1.9393e-05	0.92847	0.178894	0.5405	0.99783	1
type 2 diabetes	rs1885115	20	33681256	A	-1.5698e-05	0.92965	0.31899	0.3152	0.998066	0.998
type 2 diabetes	rs733086	20	33571749	G	1.53e-05	0.93216	0.30649	0.2187	0.998489	1
type 2 diabetes	rs6120620	20	32934054	A	1.3984e-05	0.93275	0.489695	0.9347	0.998254	1
type 2 diabetes	rs6088475	20	32964987	C	-1.395e-05	0.9329	0.49372	0.7328	0.99948	0.998
type 2 diabetes	rs6142153	20	32968747	G	-1.3945e-05	0.93292	0.493745	0.7277	0.999515	0.998
type 2 diabetes	rs13433216	20	33616301	C	1.8064e-05	0.93329	0.179094	0.5644	0.999334	1
type 2 diabetes	rs4911152	20	32955024	C	1.3799e-05	0.93361	0.490587	0.9918	0.999401	1
type 2 diabetes	rs6059824	20	33014543	C	1.376e-05	0.93381	0.493768	0.6871	0.999819	1
type 2 diabetes	rs6142157	20	32984172	G	-1.3711e-05	0.93404	0.493755	0.7406	0.99933	0.998
type 2 diabetes	rs1205342	20	32921842	T	1.3684e-05	0.93423	0.490058	0.8886	0.996977	1
type 2 diabetes	rs6142159	20	32993035	A	-1.364e-05	0.93439	0.493615	0.7431	0.998837	0.998
type 2 diabetes	rs7361656	20	33729147	G	1.5503e-05	0.93439	0.262433	0.4814	0.997747	1
type 2 diabetes	rs6059774	20	32935192	G	1.3563e-05	0.93477	0.48969	0.9292	0.998194	1
type 2 diabetes	rs11700221	20	32940320	C	1.3468e-05	0.93521	0.490147	0.8914	0.99903	1
type 2 diabetes	rs6060001	20	33294353	G	1.3324e-05	0.93626	0.445114	0.4011	0.998579	1
type 2 diabetes	rs6088529	20	33170752	A	1.4034e-05	0.93641	0.335122	0.3556	0.994958	1
type 2 diabetes	rs2378135	20	32962926	C	1.3208e-05	0.93644	0.491075	0.9673	0.999643	1
type 2 diabetes	rs55793516	20	33190165	T	1.3935e-05	0.93663	0.338615	0.3684	0.996491	1
type 2 diabetes	rs13043504	20	32946904	C	1.2892e-05	0.93803	0.490645	0.9455	0.997468	1
type 2 diabetes	rs6142297	20	33687584	G	1.3008e-05	0.93865	0.403306	0.6808	0.997299	1
type 2 diabetes	rs6059827	20	33016358	A	-1.2698e-05	0.93889	0.49117	0.932	0.999636	0.998
type 2 diabetes	rs6141482	20	33156523	C	1.3328e-05	0.9396	0.335141	0.3656	0.99481	1
type 2 diabetes	rs633784	20	33726323	G	-1.4252e-05	0.93968	0.262774	0.5428	0.996112	0.998
type 2 diabetes	rs4911421	20	32998948	C	1.2483e-05	0.93993	0.491019	0.9673	0.999317	1
type 2 diabetes	rs6060137	20	33565480	C	1.3429e-05	0.94038	0.3084	0.08142	genotyped	1
type 2 diabetes	rs6059835	20	33020141	G	-1.2322e-05	0.9407	0.491142	0.9266	0.999664	0.998
type 2 diabetes	rs3761147	20	32996689	T	1.2291e-05	0.94085	0.491012	0.9728	0.999307	1
type 2 diabetes	rs4911420	20	32998654	C	1.2267e-05	0.94097	0.491168	0.9728	0.999074	1
type 2 diabetes	rs4911419	20	32995873	A	1.226e-05	0.941	0.49101	0.9728	0.999357	1
type 2 diabetes	rs6088489	20	32997945	G	1.226e-05	0.941	0.49101	0.9728	0.99935	1
type 2 diabetes	rs6579165	20	32994715	G	1.226e-05	0.94101	0.491012	0.97	0.999319	1
type 2 diabetes	rs4911418	20	32994257	A	1.225e-05	0.94105	0.49101	0.9728	0.999318	1
type 2 diabetes	rs6059834	20	33019299	G	-1.2241e-05	0.94109	0.49117	0.9293	0.999561	0.998
type 2 diabetes	rs8125522	20	32992324	C	1.2218e-05	0.94121	0.491167	0.9728	0.999027	1
type 2 diabetes	rs6579161	20	32948784	C	1.2083e-05	0.94185	0.490003	0.9293	0.999568	1
type 2 diabetes	rs4911422	20	32999345	C	1.2075e-05	0.94189	0.491014	0.9728	0.99932	1
type 2 diabetes	rs6059779	20	32950325	T	1.201e-05	0.94221	0.489956	0.932	0.999373	1
type 2 diabetes	rs6120645	20	33025171	T	-1.1971e-05	0.94239	0.49114	0.9293	0.999653	0.998
type 2 diabetes	rs6088488	20	32992631	C	1.196e-05	0.94244	0.490998	0.9728	0.999448	1
type 2 diabetes	rs6059840	20	33030405	A	-1.1899e-05	0.94273	0.491157	0.9293	0.999638	0.998
type 2 diabetes	rs6087574	20	32948753	C	1.187e-05	0.94288	0.489982	0.9265	0.999477	1
type 2 diabetes	rs6059829	20	33017074	A	-1.1812e-05	0.94315	0.49113	0.9374	0.999646	0.998
type 2 diabetes	rs6120644	20	33023810	A	-1.1782e-05	0.94329	0.491143	0.9293	0.999583	0.998
type 2 diabetes	rs4277599	20	33008905	C	1.1719e-05	0.94359	0.491297	0.97	0.999428	1
type 2 diabetes	rs2889850	20	33010647	C	1.1707e-05	0.94365	0.49114	0.9673	0.999639	1
type 2 diabetes	rs2225837	20	33005634	T	1.159e-05	0.94422	0.491123	0.9619	0.999566	1
type 2 diabetes	rs6141486	20	33178132	A	1.2254e-05	0.94443	0.335557	0.3865	0.994682	1
type 2 diabetes	rs6088483	20	32984714	A	1.1501e-05	0.94464	0.491274	0.9646	0.999341	1
type 2 diabetes	rs6088484	20	32985961	C	1.1497e-05	0.94466	0.49128	0.9646	0.999353	1
type 2 diabetes	rs6141469	20	33004002	C	1.141e-05	0.94508	0.491144	0.9619	0.999588	1
type 2 diabetes	rs6142285	20	33643640	G	1.1839e-05	0.94508	0.381515	0.3016	0.982933	1
type 2 diabetes	rs945674	20	32964247	C	1.1364e-05	0.9453	0.491104	0.9564	0.999557	1
type 2 diabetes	rs4911417	20	32970606	G	1.1344e-05	0.9454	0.491268	0.9619	0.999429	1
type 2 diabetes	rs4911433	20	33190379	T	1.2002e-05	0.94541	0.338578	0.3644	0.996622	1
type 2 diabetes	rs7264012	20	33191027	C	1.1985e-05	0.94545	0.338674	0.3747	0.99775	1
type 2 diabetes	rs6088478	20	32971719	C	1.1309e-05	0.94556	0.491266	0.9619	0.999426	1
type 2 diabetes	rs2424992	20	33012060	T	-1.1281e-05	0.94571	0.491057	0.9428	0.999344	0.998
type 2 diabetes	rs6119497	20	33012529	A	-1.1269e-05	0.94576	0.49108	0.9428	0.999389	0.998
type 2 diabetes	rs6120803	20	33620086	A	1.4471e-05	0.94655	0.178907	0.5921	0.9996	1
type 2 diabetes	rs6058029	20	32969643	C	1.1102e-05	0.94656	0.49111	0.9619	0.999764	1
type 2 diabetes	rs6059797	20	32971424	A	1.11e-05	0.94657	0.49111	0.9619	0.99977	1
type 2 diabetes	rs6088479	20	32971736	C	1.108e-05	0.94666	0.49111	0.9646	0.999768	1
type 2 diabetes	rs6142201	20	33191752	T	1.1686e-05	0.94681	0.338589	0.3787	0.997572	1
type 2 diabetes	rs2184836	20	32963369	G	1.1047e-05	0.94682	0.49109	0.9564	0.999673	1
type 2 diabetes	rs4911423	20	32999386	A	1.1015e-05	0.94699	0.491075	0.9946	0.998994	1
type 2 diabetes	rs6058040	20	33013751	G	-1.1004e-05	0.94704	0.491266	0.9483	0.999265	0.998
type 2 diabetes	rs6088678	20	33607551	T	1.4134e-05	0.9478	0.178789	0.5719	0.999748	1
type 2 diabetes	rs1890000	20	32968312	T	1.0622e-05	0.94887	0.491311	0.9483	0.999232	1
type 2 diabetes	rs6120819	20	33653038	C	-1.382e-05	0.94895	0.179304	0.4704	0.997708	0.998
type 2 diabetes	rs6059880	20	33088669	A	-1.0579e-05	0.94911	0.492412	0.8778	0.99775	0.998
type 2 diabetes	rs752448	20	33592248	T	1.3695e-05	0.94947	0.178543	0.5718	0.999206	1
type 2 diabetes	rs6088715	20	33700468	A	1.0675e-05	0.94962	0.40333	0.6269	0.997953	1
type 2 diabetes	rs6141471	20	33006730	G	1.0464e-05	0.94963	0.491204	0.9918	0.999348	1
type 2 diabetes	rs6088716	20	33700499	T	1.0672e-05	0.94964	0.403316	0.6294	0.997875	1
type 2 diabetes	rs2077574	20	33571919	T	1.1307e-05	0.94974	0.307869	0.2825	0.9997	1
type 2 diabetes	rs36003887	20	33589107	A	1.3521e-05	0.95008	0.178727	0.6039	0.999457	1
type 2 diabetes	rs6120790	20	33599090	T	1.3309e-05	0.95084	0.178833	0.5446	0.999794	1
type 2 diabetes	rs6142298	20	33688417	G	1.0277e-05	0.95155	0.403272	0.6833	0.996253	1
type 2 diabetes	rs6120799	20	33614955	C	1.2746e-05	0.95292	0.17889	0.5641	0.999456	1
type 2 diabetes	rs6087579	20	32985155	G	9.5021e-06	0.95425	0.491304	0.9592	0.999044	1
type 2 diabetes	rs721613	20	33193428	G	1.0044e-05	0.95427	0.33877	0.3566	0.997702	1
type 2 diabetes	rs6088690	20	33633326	G	1.2244e-05	0.95477	0.178953	0.5841	0.999442	1
type 2 diabetes	rs3736762	20	33037336	T	-9.3778e-06	0.95485	0.491076	0.9157	0.999607	0.999
type 2 diabetes	rs17310782	20	33565665	T	-1.0007e-05	0.95551	0.307817	0.2806	0.999924	0.998
type 2 diabetes	rs2013125	20	33601154	A	1.1939e-05	0.95591	0.178689	0.5214	0.99984	1
type 2 diabetes	rs6058051	20	33044862	A	-9.134e-06	0.95602	0.49102	0.9483	0.999732	0.999
type 2 diabetes	rs6120797	20	33606002	A	1.1558e-05	0.95731	0.178698	0.5444	0.999883	1
type 2 diabetes	rs6059855	20	33057328	G	-8.7975e-06	0.95764	0.491024	0.9592	0.999687	0.999
type 2 diabetes	rs6120650	20	33039973	A	-8.7788e-06	0.95773	0.491021	0.9293	0.999731	0.999
type 2 diabetes	rs11167253	20	33614449	C	1.1431e-05	0.95778	0.178738	0.5483	0.999658	1
type 2 diabetes	rs6087587	20	33058628	T	-8.7538e-06	0.95785	0.49102	0.9592	0.999696	0.999
type 2 diabetes	rs6088686	20	33623437	T	1.1351e-05	0.95807	0.178793	0.564	0.999519	1
type 2 diabetes	rs6088691	20	33633758	T	1.1271e-05	0.95837	0.178799	0.5601	0.99956	1
type 2 diabetes	rs1205346	20	32914269	T	8.6128e-06	0.95858	0.49003	0.9021	0.996425	1
type 2 diabetes	rs6120788	20	33583716	T	1.1165e-05	0.9588	0.178523	0.6239	0.998896	1
type 2 diabetes	rs6059861	20	33068563	T	-8.5556e-06	0.95881	0.491115	1	0.999255	0.999
type 2 diabetes	rs1205343	20	32921602	G	8.5514e-06	0.95887	0.48957	0.8698	0.996909	1
type 2 diabetes	rs6059850	20	33044784	G	-8.3826e-06	0.95963	0.491017	0.9592	0.999657	0.999
type 2 diabetes	rs6142208	20	33220263	T	8.8661e-06	0.95967	0.336426	0.4424	0.999849	1
type 2 diabetes	rs6059845	20	33036500	A	-8.3248e-06	0.95992	0.491197	0.9211	0.999535	0.999
type 2 diabetes	rs6059851	20	33047945	A	-8.1007e-06	0.96099	0.491168	0.9564	0.999511	0.999
type 2 diabetes	rs6059843	20	33036128	G	-8.0745e-06	0.96112	0.491235	0.9157	0.999501	0.999
type 2 diabetes	rs2378133	20	32919505	G	8.0261e-06	0.9614	0.489519	0.8698	0.996576	1
type 2 diabetes	rs1040747	20	33145832	G	8.499e-06	0.96149	0.334606	0.4131	0.993414	1
type 2 diabetes	rs6087606	20	33194426	C	8.3579e-06	0.96194	0.338843	0.3626	0.997924	1
type 2 diabetes	rs752075	20	33591591	A	1.0188e-05	0.96245	0.178132	0.67	0.997795	1
type 2 diabetes	rs17319032	20	33643296	C	1.001e-05	0.96303	0.178731	0.5444	0.999698	1
type 2 diabetes	rs6088537	20	33195608	T	7.6997e-06	0.96494	0.338469	0.3954	0.997763	1
type 2 diabetes	rs1890002	20	32919219	G	7.1908e-06	0.96542	0.489472	0.9021	0.996555	1
type 2 diabetes	rs6142202	20	33194798	T	7.4834e-06	0.96593	0.338475	0.3975	0.997733	1
type 2 diabetes	rs6088524	20	33139384	C	7.3604e-06	0.96666	0.334521	0.3957	0.992866	1
type 2 diabetes	rs3818253	20	33596876	A	9.008e-06	0.96672	0.178824	0.5292	0.999513	1
type 2 diabetes	rs6141493	20	33218649	G	7.1063e-06	0.96766	0.336962	0.427	0.998513	1
type 2 diabetes	rs6088548	20	33215745	C	6.8915e-06	0.96864	0.337108	0.4382	0.99865	1
type 2 diabetes	rs6087609	20	33214541	C	6.8406e-06	0.96887	0.337112	0.4315	0.998782	1
type 2 diabetes	rs4911153	20	32961547	T	-6.1384e-06	0.97044	0.493551	0.7639	0.99954	0.999
type 2 diabetes	rs6088508	20	33060081	G	-6.0046e-06	0.97108	0.491155	0.9973	0.998882	0.999
type 2 diabetes	rs1205345	20	32914699	C	5.9645e-06	0.97131	0.48927	0.9157	0.996435	1
type 2 diabetes	rs2295887	20	33714187	A	6.0034e-06	0.97163	0.403111	0.5851	0.999858	1
type 2 diabetes	rs6059893	20	33105897	G	-5.7915e-06	0.97211	0.491302	0.9918	0.999178	0.999
type 2 diabetes	rs6142302	20	33713251	G	5.8746e-06	0.97224	0.403102	0.5754	0.999922	1
type 2 diabetes	rs6142301	20	33712148	C	5.8248e-06	0.97248	0.403098	0.5778	0.999902	1
type 2 diabetes	rs6059866	20	33075810	G	-5.644e-06	0.97282	0.491248	1	0.998904	0.999
type 2 diabetes	rs6141535	20	33715067	A	5.7479e-06	0.97287	0.403071	0.5949	0.997583	1
type 2 diabetes	rs7268266	20	33581889	C	7.2928e-06	0.97306	0.178933	0.5721	0.998823	1
type 2 diabetes	rs1989395	20	33707989	T	5.6295e-06	0.97341	0.403123	0.5658	0.999415	1
type 2 diabetes	rs2378205	20	33110803	G	-5.462e-06	0.97369	0.491099	0.9946	0.999447	0.999
type 2 diabetes	rs1885116	20	33600560	G	6.9455e-06	0.97433	0.178955	0.5448	0.999761	1
type 2 diabetes	rs6120793	20	33604407	C	6.8885e-06	0.97454	0.178946	0.5448	0.999818	1
type 2 diabetes	rs1885117	20	33600740	T	6.8336e-06	0.97474	0.178949	0.5448	0.999776	1
type 2 diabetes	rs3746444	20	33578251	G	6.7912e-06	0.97491	0.178803	0.5563	0.999171	1
type 2 diabetes	rs13044899	20	33287078	A	5.152e-06	0.9755	0.436485	0.7021	0.988654	1
type 2 diabetes	rs2378204	20	33067904	G	-4.9269e-06	0.97627	0.491039	0.9864	0.999595	0.999
type 2 diabetes	rs6058057	20	33065283	A	-4.8718e-06	0.97653	0.491033	0.9918	0.999619	0.999
type 2 diabetes	rs6120804	20	33623701	A	6.3283e-06	0.97663	0.17985	0.503	0.994355	1
type 2 diabetes	rs6120828	20	33674460	C	6.1693e-06	0.97721	0.178832	0.5406	0.998521	1
type 2 diabetes	rs6142299	20	33704888	C	4.8142e-06	0.97727	0.402794	0.5899	0.998158	1
type 2 diabetes	rs6087677	20	33714805	C	4.7636e-06	0.97751	0.403014	0.6047	0.998278	1
type 2 diabetes	rs2065111	20	33708637	C	4.7298e-06	0.97766	0.40305	0.5705	0.999275	1
type 2 diabetes	rs6058059	20	33070159	T	-4.3713e-06	0.97894	0.491029	0.9782	0.999648	0.999
type 2 diabetes	rs6059872	20	33082775	A	-4.3066e-06	0.97926	0.491021	0.9782	0.999666	0.999
type 2 diabetes	rs2378333	20	33708890	G	4.2515e-06	0.97992	0.403104	0.5681	0.998642	1
type 2 diabetes	rs2144717	20	33076333	G	-3.9273e-06	0.98108	0.490954	0.9946	0.999226	0.999
type 2 diabetes	rs6119560	20	33606977	C	5.1191e-06	0.98108	0.178984	0.5643	0.999737	1
type 2 diabetes	rs6059868	20	33079460	G	-3.9081e-06	0.98117	0.491189	0.9864	0.999521	0.999
type 2 diabetes	rs6120812	20	33629427	C	5.0891e-06	0.98119	0.179082	0.5763	0.999459	1
type 2 diabetes	rs6059905	20	33126946	C	-3.8462e-06	0.98151	0.490892	0.9536	0.995855	0.999
type 2 diabetes	rs3746446	20	33574765	C	4.7925e-06	0.98229	0.178883	0.5721	0.999002	1
type 2 diabetes	rs6088725	20	33713040	A	3.6854e-06	0.98259	0.402799	0.535	0.999271	1
type 2 diabetes	rs6059863	20	33069600	G	-3.5489e-06	0.98291	0.491234	0.9891	0.999206	0.999
type 2 diabetes	rs11904852	20	33216764	A	3.6674e-06	0.98331	0.336671	0.4679	0.998417	1
type 2 diabetes	rs6088682	20	33615702	C	4.0734e-06	0.98494	0.179037	0.5565	0.999431	1
type 2 diabetes	rs6120813	20	33642112	C	4.0724e-06	0.98495	0.179009	0.5723	0.999563	1
type 2 diabetes	rs6059882	20	33090167	C	-2.8972e-06	0.98604	0.491235	0.9782	0.999155	1
type 2 diabetes	rs6059887	20	33101102	G	-2.889e-06	0.98608	0.490931	0.9918	0.999283	1
type 2 diabetes	rs6058073	20	33116483	C	-2.8861e-06	0.9861	0.491039	0.9809	0.999085	1
type 2 diabetes	rs6088543	20	33206191	T	3.0363e-06	0.98618	0.337149	0.436	0.998476	1
type 2 diabetes	rs6059892	20	33105766	G	-2.8532e-06	0.98626	0.491039	0.9973	0.999384	1
type 2 diabetes	rs6059890	20	33101653	C	-2.8309e-06	0.98636	0.491187	0.9946	0.999217	1
type 2 diabetes	rs6120669	20	33105028	C	-2.8253e-06	0.98639	0.490984	0.9837	0.999229	1
type 2 diabetes	rs6120666	20	33090718	G	-2.7862e-06	0.98658	0.490966	0.9946	0.999296	1
type 2 diabetes	rs6120668	20	33099793	G	-2.7749e-06	0.98664	0.490914	1	0.998964	1
type 2 diabetes	rs6579178	20	33203552	A	2.9281e-06	0.98667	0.337076	0.436	0.99827	1
type 2 diabetes	rs6087592	20	33114503	G	-2.7474e-06	0.98677	0.491153	0.9946	0.998486	1
type 2 diabetes	rs6088721	20	33706011	C	2.7428e-06	0.98704	0.402847	0.6072	0.998457	1
type 2 diabetes	rs6088703	20	33676049	A	-3.419e-06	0.98737	0.179014	0.5327	0.997145	0.999
type 2 diabetes	rs6088542	20	33204410	T	2.5405e-06	0.98844	0.337084	0.436	0.998624	1
type 2 diabetes	rs3746435	20	33587198	G	3.0596e-06	0.98871	0.1787	0.8473	genotyped	1
type 2 diabetes	rs6088726	20	33713055	G	-2.2427e-06	0.98941	0.402398	0.5537	0.998802	1
type 2 diabetes	rs6058094	20	33224174	T	-1.9731e-06	0.99054	0.45053	0.7301	0.998671	1
type 2 diabetes	rs7261969	20	33563611	T	-2.4674e-06	0.99088	0.178855	0.5841	0.999356	1
type 2 diabetes	rs6088727	20	33713639	A	1.7828e-06	0.9916	0.4044	0.03792	genotyped	1
type 2 diabetes	rs6088667	20	33566722	G	-2.1147e-06	0.99219	0.178806	0.5563	0.999599	1
type 2 diabetes	rs8501	20	33590584	C	1.6949e-06	0.99374	0.178924	0.5681	0.999363	1
type 2 diabetes	rs6087667	20	33651887	G	1.6787e-06	0.9938	0.178897	0.5446	0.998689	1
type 2 diabetes	rs6059897	20	33113224	G	-9.8599e-07	0.99525	0.491221	0.9891	0.998943	1
type 2 diabetes	rs6088694	20	33652371	A	1.2064e-06	0.99554	0.178919	0.5407	0.998504	1
type 2 diabetes	rs2065109	20	33707135	C	7.4186e-07	0.9965	0.402741	0.5826	0.998703	1
type 2 diabetes	rs927442	20	33708871	G	-7.3653e-07	0.99652	0.40272	0.5802	0.998185	1
type 2 diabetes	rs6120777	20	33560172	A	-8.5156e-07	0.99701	0.159354	0.1836	0.986122	1
type 2 diabetes	rs2273805	20	33706575	A	6.3254e-07	0.99701	0.40274	0.5826	0.998656	1
type 2 diabetes	rs6088723	20	33709279	C	-6.1284e-07	0.9971	0.402672	0.5899	0.998969	1
type 2 diabetes	rs6088547	20	33212947	A	-4.4807e-07	0.99796	0.337024	0.4337	0.998357	1
type 2 diabetes	rs6120821	20	33660761	C	-4.7444e-07	0.99825	0.178878	0.533	0.998657	1
type 2 diabetes	rs6088724	20	33712915	T	-3.6663e-07	0.99827	0.40267	0.5948	0.999298	1
type 2 diabetes	rs6579219	20	33711391	G	-2.7671e-07	0.99869	0.402684	0.6022	0.999139	1
type 2 diabetes	rs6088700	20	33660752	C	-3.4969e-07	0.99871	0.178875	0.533	0.998676	1
type 2 diabetes	rs2016438	20	33708023	G	-2.6758e-07	0.99874	0.402705	0.5802	0.998823	1
type 2 diabetes	rs6087577	20	32955423	G	2.4515e-07	0.99882	0.4897	0.06474	genotyped	1
type 2 diabetes	rs6088728	20	33713674	C	2.3288e-07	0.9989	0.402668	0.5948	0.999368	1
type 2 diabetes	rs2065108	20	33706822	T	2.0995e-07	0.99901	0.40272	0.585	0.99876	1
type 2 diabetes	rs6120838	20	33711624	A	-5.0116e-08	0.99976	0.402679	0.5973	0.999268	1

## Sheet: NIDDM-GSS
Trait	Variant	Chromosome	Position	Eff. allele	beta	pv	MAF	HWE	imp. score	ORbeta*
E11 Non-insulin-dependent diabetes mellitus	rs12626122	20	33425800	G	0.0010376	0.013772	0.374328	0.838	0.994259	1.03
E11 Non-insulin-dependent diabetes mellitus	rs6088595	20	33358499	A	0.0009974	0.017585	0.376878	0.8416	0.997054	1.02
E11 Non-insulin-dependent diabetes mellitus	rs2236270	20	33523155	T	0.00099182	0.018794	0.381959	0.7802	0.982611	1.02
E11 Non-insulin-dependent diabetes mellitus	rs6088617	20	33408036	A	0.0009747	0.01969	0.386823	0.8998	0.998065	1.02
E11 Non-insulin-dependent diabetes mellitus	rs6087631	20	33403509	C	0.00097141	0.020036	0.386874	0.8799	0.999174	1.02
E11 Non-insulin-dependent diabetes mellitus	rs6087632	20	33407704	C	0.00097072	0.020183	0.387017	0.9141	0.998141	1.02
E11 Non-insulin-dependent diabetes mellitus	rs6088620	20	33412022	G	0.00096796	0.02063	0.386712	0.897	0.996966	1.02
E11 Non-insulin-dependent diabetes mellitus	rs2180276	20	33360785	A	0.00096152	0.021396	0.387065	0.9083	0.997766	1.02
E11 Non-insulin-dependent diabetes mellitus	rs6120727	20	33374102	C	0.00096033	0.021533	0.38697	0.8941	0.998299	1.02
E11 Non-insulin-dependent diabetes mellitus	rs7267403	20	33372856	A	0.0009601	0.021562	0.386975	0.8855	0.998334	1.02
E11 Non-insulin-dependent diabetes mellitus	rs6087626	20	33347328	T	0.00096002	0.021564	0.387214	0.9112	0.998082	1.02
E11 Non-insulin-dependent diabetes mellitus	rs6119524	20	33373813	T	0.00095995	0.021582	0.386977	0.8827	0.998341	1.02
E11 Non-insulin-dependent diabetes mellitus	rs11698996	20	33449739	G	0.00096713	0.021638	0.372532	0.9913	0.996902	1.02
E11 Non-insulin-dependent diabetes mellitus	rs6120723	20	33364655	T	0.00095952	0.021641	0.386979	0.8798	0.998302	1.02
E11 Non-insulin-dependent diabetes mellitus	rs6088607	20	33378733	T	0.00095949	0.021656	0.38699	0.8969	0.998193	1.02
E11 Non-insulin-dependent diabetes mellitus	rs28542147	20	33376323	A	0.00095932	0.02167	0.386971	0.8827	0.99831	1.02
E11 Non-insulin-dependent diabetes mellitus	rs13041059	20	33366641	G	0.00095846	0.021789	0.386974	0.8855	0.998283	1.02
E11 Non-insulin-dependent diabetes mellitus	rs6119522	20	33366481	A	0.00095851	0.021794	0.387045	0.8827	0.998036	1.02
E11 Non-insulin-dependent diabetes mellitus	rs2076668	20	33437621	G	-0.00096137	0.022245	0.379	0.08074	genotyped	0.977
E11 Non-insulin-dependent diabetes mellitus	rs6120724	20	33366470	T	0.00095422	0.022621	0.386202	0.9026	0.995593	1.02
E11 Non-insulin-dependent diabetes mellitus	rs6119530	20	33403930	G	0.00095216	0.022654	0.386633	0.8884	0.999076	1.02
E11 Non-insulin-dependent diabetes mellitus	rs6119516	20	33328024	T	0.00094668	0.023425	0.387586	0.8488	0.998077	1.02
E11 Non-insulin-dependent diabetes mellitus	rs6058111	20	33310999	C	0.00094495	0.023686	0.38763	0.8544	0.997899	1.02
E11 Non-insulin-dependent diabetes mellitus	rs6120705	20	33313740	C	0.00094419	0.023805	0.387446	0.86	0.998003	1.02
E11 Non-insulin-dependent diabetes mellitus	rs6087623	20	33317662	G	0.00094346	0.023912	0.387439	0.8629	0.998042	1.02
E11 Non-insulin-dependent diabetes mellitus	rs11698977	20	33449691	T	0.00094583	0.023994	0.381834	0.9394	0.997502	1.02
E11 Non-insulin-dependent diabetes mellitus	rs6120730	20	33385102	C	0.0009412	0.024297	0.386738	0.894	0.998266	1.02
E11 Non-insulin-dependent diabetes mellitus	rs6088590	20	33313566	C	0.00094056	0.024346	0.387476	0.8544	0.997764	1.02
E11 Non-insulin-dependent diabetes mellitus	rs2295353	20	33356511	T	0.00093892	0.024641	0.386749	0.8855	0.998273	1.02
E11 Non-insulin-dependent diabetes mellitus	rs6120708	20	33335526	A	0.00093864	0.024645	0.387849	0.8827	0.99764	1.02
E11 Non-insulin-dependent diabetes mellitus	rs2295354	20	33356541	C	0.00093886	0.02465	0.386748	0.8883	0.998286	1.02
E11 Non-insulin-dependent diabetes mellitus	rs13040449	20	33358901	A	0.00093859	0.024748	0.386466	0.8627	0.997572	1.02
E11 Non-insulin-dependent diabetes mellitus	rs10048849	20	33419680	T	0.0009389	0.024952	0.384887	0.7892	0.995916	1.02
E11 Non-insulin-dependent diabetes mellitus	rs35393655	20	33452915	A	0.00093061	0.026406	0.38178	0.845	0.996812	1.02
E11 Non-insulin-dependent diabetes mellitus	rs1998028	20	33344595	T	0.00092522	0.026787	0.38719	0.8628	0.997999	1.02
E11 Non-insulin-dependent diabetes mellitus	rs6119534	20	33441257	T	0.00092834	0.02689	0.379067	0.6876	0.997563	1.02
E11 Non-insulin-dependent diabetes mellitus	rs11696546	20	33452999	G	0.00092682	0.026964	0.382059	0.8907	0.997365	1.02
E11 Non-insulin-dependent diabetes mellitus	rs6119512	20	33306904	C	0.00092264	0.027224	0.387235	0.8685	0.997844	1.02
E11 Non-insulin-dependent diabetes mellitus	rs6088624	20	33436852	A	0.00092442	0.027275	0.381806	0.8594	0.998869	1.02
E11 Non-insulin-dependent diabetes mellitus	rs6087625	20	33342477	A	0.00092223	0.027285	0.387213	0.86	0.997976	1.02
E11 Non-insulin-dependent diabetes mellitus	rs3787222	20	33333040	A	0.00092136	0.027477	0.387096	0.86	0.997449	1.02
E11 Non-insulin-dependent diabetes mellitus	rs6087639	20	33443866	A	0.0009204	0.027936	0.382081	0.8566	0.998738	1.02
E11 Non-insulin-dependent diabetes mellitus	rs67159833	20	33488079	C	0.00092818	0.027981	0.367528	0.8286	0.99643	1.02
E11 Non-insulin-dependent diabetes mellitus	rs113604906	20	32599334	G	-0.0022751	0.029244	0.03966	0.392	genotyped	0.947
E11 Non-insulin-dependent diabetes mellitus	rs7262834	20	33400913	T	0.0009099	0.029353	0.388572	0.7518	0.997725	1.02
E11 Non-insulin-dependent diabetes mellitus	rs6120747	20	33449769	C	0.00091127	0.029766	0.380759	0.8223	0.997148	1.02
E11 Non-insulin-dependent diabetes mellitus	rs6120750	20	33465289	C	0.000908	0.030167	0.381884	0.9424	0.998546	1.02
E11 Non-insulin-dependent diabetes mellitus	rs112712641	20	32599316	T	0.0022279	0.0312	0.0403054	0.3636	0.998868	1.05
E11 Non-insulin-dependent diabetes mellitus	rs55753039	20	33394940	T	0.00089758	0.03165	0.388619	0.7572	0.99717	1.02
E11 Non-insulin-dependent diabetes mellitus	rs6088521	20	33133184	C	0.00088011	0.033375	0.476982	0.3137	0.969652	1.02
E11 Non-insulin-dependent diabetes mellitus	rs78116891	20	32655691	C	-0.0017363	0.039099	0.06259	0.3954	genotyped	0.959
E11 Non-insulin-dependent diabetes mellitus	rs75261307	20	32567143	T	0.0021697	0.0407	0.0392919	0.3632	0.973425	1.05
E11 Non-insulin-dependent diabetes mellitus	rs6142137	20	32903904	C	0.00084287	0.042556	0.42853	0.6446	0.977169	1.02
E11 Non-insulin-dependent diabetes mellitus	rs6058108	20	33288655	G	0.00080029	0.05485	0.395269	0.7614	0.99567	1.02
E11 Non-insulin-dependent diabetes mellitus	rs4911445	20	33378752	C	-0.0007824	0.056929	0.430336	0.725	0.998359	0.982
E11 Non-insulin-dependent diabetes mellitus	rs6060038	20	33357715	A	-0.00078219	0.057002	0.430052	0.7832	0.998467	0.982
E11 Non-insulin-dependent diabetes mellitus	rs6060039	20	33357945	T	-0.00078153	0.057225	0.429844	0.7965	0.998375	0.982
E11 Non-insulin-dependent diabetes mellitus	rs4911444	20	33378448	G	-0.00078146	0.05723	0.430329	0.7302	0.99832	0.982
E11 Non-insulin-dependent diabetes mellitus	rs6060048	20	33370266	C	-0.00078031	0.05761	0.430054	0.7966	0.998411	0.982
E11 Non-insulin-dependent diabetes mellitus	rs2424997	20	33384805	G	0.00077948	0.057861	0.430323	0.7329	0.998384	1.02
E11 Non-insulin-dependent diabetes mellitus	rs2378337	20	33771435	A	0.00077861	0.058303	0.4385	0.05844	genotyped	1.02
E11 Non-insulin-dependent diabetes mellitus	rs6058198	20	33748253	A	0.00077671	0.058593	0.437239	0.3743	0.997865	1.02
E11 Non-insulin-dependent diabetes mellitus	rs910869	20	33292777	T	0.00078808	0.058734	0.393556	0.8665	0.996534	1.02
E11 Non-insulin-dependent diabetes mellitus	rs6060052	20	33382665	G	0.0007751	0.059305	0.430185	0.725	0.998331	1.02
E11 Non-insulin-dependent diabetes mellitus	rs11167245	20	33371537	C	-0.00077456	0.059467	0.430125	0.7752	0.998457	0.982
E11 Non-insulin-dependent diabetes mellitus	rs1986110	20	33319036	T	-0.00077466	0.059479	0.429798	0.7938	0.998085	0.982
E11 Non-insulin-dependent diabetes mellitus	rs6141514	20	33377565	T	-0.0007733	0.059876	0.430113	0.7672	0.998519	0.982
E11 Non-insulin-dependent diabetes mellitus	rs62213657	20	33341129	T	-0.00077212	0.060345	0.429544	0.8235	0.998072	0.982
E11 Non-insulin-dependent diabetes mellitus	rs3787219	20	33355261	T	-0.00077109	0.060667	0.429652	0.8127	0.997977	0.982
E11 Non-insulin-dependent diabetes mellitus	rs4911441	20	33316546	C	-0.0007706	0.060835	0.429619	0.8344	0.998051	0.982
E11 Non-insulin-dependent diabetes mellitus	rs6141509	20	33319388	A	-0.00076856	0.06152	0.429608	0.8398	0.99815	0.982
E11 Non-insulin-dependent diabetes mellitus	rs6060013	20	33308809	G	-0.00076776	0.061799	0.429599	0.8371	0.998031	0.982
E11 Non-insulin-dependent diabetes mellitus	rs17092066	20	33322840	C	-0.00076688	0.062085	0.429715	0.8398	0.997831	0.982
E11 Non-insulin-dependent diabetes mellitus	rs6088734	20	33745046	T	0.00076452	0.062613	0.43727	0.405	0.99818	1.02
E11 Non-insulin-dependent diabetes mellitus	rs1018503	20	33325516	G	-0.00076518	0.062691	0.429769	0.81	0.997936	0.982
E11 Non-insulin-dependent diabetes mellitus	rs6060015	20	33310057	T	-0.00076471	0.062844	0.429577	0.8371	0.998033	0.982
E11 Non-insulin-dependent diabetes mellitus	rs6060012	20	33305220	T	-0.00076424	0.063	0.429646	0.8426	0.997743	0.982
E11 Non-insulin-dependent diabetes mellitus	rs6087618	20	33288407	T	0.00077454	0.063189	0.394868	0.745	0.995799	1.02
E11 Non-insulin-dependent diabetes mellitus	rs6087619	20	33288511	C	0.00077441	0.063236	0.394867	0.745	0.995812	1.02
E11 Non-insulin-dependent diabetes mellitus	rs2378259	20	33341688	A	-0.00076066	0.064223	0.429638	0.829	0.997934	0.982
E11 Non-insulin-dependent diabetes mellitus	rs6087624	20	33336085	G	-0.00075974	0.064555	0.429653	0.8263	0.997891	0.982
E11 Non-insulin-dependent diabetes mellitus	rs633198	20	33778434	C	-0.0007564	0.065484	0.438413	0.6323	0.996697	0.982
E11 Non-insulin-dependent diabetes mellitus	rs6087683	20	33774444	T	0.00075365	0.066156	0.438488	0.6398	0.999375	1.02
E11 Non-insulin-dependent diabetes mellitus	rs4602286	20	33772707	T	0.00075319	0.066241	0.440948	0.6476	0.998455	1.02
E11 Non-insulin-dependent diabetes mellitus	rs2378256	20	33292127	C	0.0007639	0.066912	0.394019	0.8525	0.996241	1.02
E11 Non-insulin-dependent diabetes mellitus	rs2065978	20	33767291	T	0.00074729	0.068519	0.437857	0.5671	0.999578	1.02
E11 Non-insulin-dependent diabetes mellitus	rs6088753	20	33768252	T	0.00074665	0.068695	0.440259	0.5865	0.998529	1.02
E11 Non-insulin-dependent diabetes mellitus	rs945960	20	33762854	G	0.00073992	0.071384	0.437241	0.5484	0.999351	1.02
E11 Non-insulin-dependent diabetes mellitus	rs6060057	20	33392283	G	0.00074158	0.07144	0.428364	0.9222	0.997459	1.02
E11 Non-insulin-dependent diabetes mellitus	rs2425001	20	33394868	T	0.00074121	0.071574	0.428442	0.925	0.997338	1.02
E11 Non-insulin-dependent diabetes mellitus	rs6060285	20	33770487	T	0.00073824	0.071933	0.437959	0.5789	0.999604	1.02
E11 Non-insulin-dependent diabetes mellitus	rs4911472	20	33775377	A	0.00073799	0.072041	0.438002	0.6672	0.99918	1.02
E11 Non-insulin-dependent diabetes mellitus	rs2425000	20	33391141	C	0.00073911	0.072432	0.428354	0.9139	0.996865	1.02
E11 Non-insulin-dependent diabetes mellitus	rs4263187	20	33773283	C	0.00073542	0.072993	0.438061	0.6697	0.999496	1.02
E11 Non-insulin-dependent diabetes mellitus	rs6058202	20	33777983	G	0.00073528	0.07331	0.438005	0.6596	0.997468	1.02
E11 Non-insulin-dependent diabetes mellitus	rs1415774	20	33765616	G	0.00073483	0.073407	0.43764	0.5812	0.998722	1.02
E11 Non-insulin-dependent diabetes mellitus	rs6088744	20	33750142	C	0.00072934	0.073744	0.478193	0.2069	0.997855	1.02
E11 Non-insulin-dependent diabetes mellitus	rs2065979	20	33767690	C	0.00073423	0.073991	0.439418	0.6048	0.995411	1.02
E11 Non-insulin-dependent diabetes mellitus	rs6088758	20	33769203	G	0.00073146	0.074627	0.437411	0.598	0.999468	1.02
E11 Non-insulin-dependent diabetes mellitus	rs1987165	20	33756206	C	0.0007309	0.075344	0.437223	0.4911	0.99604	1.02
E11 Non-insulin-dependent diabetes mellitus	rs1415773	20	33765585	A	0.00072966	0.075454	0.437631	0.5765	0.998739	1.02
E11 Non-insulin-dependent diabetes mellitus	rs6142313	20	33780427	G	-0.00073111	0.075571	0.438257	0.6521	0.992108	0.983
E11 Non-insulin-dependent diabetes mellitus	rs9574	20	33764632	G	0.00072897	0.075628	0.437522	0.5601	0.999493	1.02
E11 Non-insulin-dependent diabetes mellitus	rs3746427	20	33730464	G	0.00072989	0.075681	0.438	0.1458	genotyped	1.02
E11 Non-insulin-dependent diabetes mellitus	rs2273684	20	33529766	G	0.0007327	0.07575	0.445412	0.4154	0.982417	1.02
E11 Non-insulin-dependent diabetes mellitus	rs635279	20	33778882	T	-0.0007288	0.076114	0.437901	0.6697	0.995769	0.983
E11 Non-insulin-dependent diabetes mellitus	rs6088747	20	33754604	T	0.00072931	0.076226	0.439343	0.3814	0.993868	1.02
E11 Non-insulin-dependent diabetes mellitus	rs2069952	20	33763951	T	0.00072592	0.07687	0.437426	0.598	0.99941	1.02
E11 Non-insulin-dependent diabetes mellitus	rs2069944	20	33761498	G	0.00072475	0.077371	0.437222	0.6346	0.999231	1.02
E11 Non-insulin-dependent diabetes mellitus	rs6119510	20	33287782	G	0.00073396	0.077776	0.400814	0.8116	0.994086	1.02
E11 Non-insulin-dependent diabetes mellitus	rs4911476	20	33780768	C	-0.00072554	0.077859	0.438249	0.6298	0.991951	0.983
E11 Non-insulin-dependent diabetes mellitus	rs2069943	20	33761408	C	0.00072223	0.078448	0.437164	0.6297	0.998999	1.02
E11 Non-insulin-dependent diabetes mellitus	rs2069948	20	33762489	T	0.00072058	0.079105	0.437225	0.6297	0.999191	1.02
E11 Non-insulin-dependent diabetes mellitus	rs4911475	20	33780334	A	-0.00072024	0.080029	0.437978	0.6372	0.992619	0.983
E11 Non-insulin-dependent diabetes mellitus	rs4911478	20	33782625	C	-0.00071568	0.082032	0.438373	0.6521	0.991362	0.983
E11 Non-insulin-dependent diabetes mellitus	rs6142322	20	33788538	A	-0.00071165	0.083881	0.438314	0.6422	0.990675	0.983
E11 Non-insulin-dependent diabetes mellitus	rs74786956	20	33786043	C	-0.00071078	0.084185	0.43842	0.6647	0.991114	0.983
E11 Non-insulin-dependent diabetes mellitus	rs34515766	20	33785221	G	-0.00070981	0.084577	0.438373	0.6597	0.991545	0.983
E11 Non-insulin-dependent diabetes mellitus	rs1577924	20	33784288	G	-0.00070879	0.085026	0.43832	0.6571	0.991583	0.983
E11 Non-insulin-dependent diabetes mellitus	rs6142320	20	33788193	G	-0.00070616	0.086268	0.438145	0.6446	0.991461	0.983
E11 Non-insulin-dependent diabetes mellitus	rs6142321	20	33788474	A	-0.00070575	0.086456	0.438102	0.6546	0.991452	0.983
E11 Non-insulin-dependent diabetes mellitus	rs2103971	20	33786256	C	-0.00070449	0.086993	0.438228	0.6521	0.991387	0.983
E11 Non-insulin-dependent diabetes mellitus	rs6087567	20	32825638	T	0.00074772	0.087517	0.3202	0.08403	genotyped	1.02
E11 Non-insulin-dependent diabetes mellitus	rs2093059	20	33791310	C	-0.00070381	0.0879	0.438535	0.6921	0.986803	0.983
E11 Non-insulin-dependent diabetes mellitus	rs4911163	20	33470694	T	0.00072103	0.089143	0.3787	0.07442	genotyped	1.02
E11 Non-insulin-dependent diabetes mellitus	rs6142324	20	33789043	T	-0.0006981	0.089974	0.43793	0.6874	0.990603	0.984
E11 Non-insulin-dependent diabetes mellitus	rs6088461	20	32905161	T	0.00069929	0.090414	0.42632	0.3571	0.992163	1.02
E11 Non-insulin-dependent diabetes mellitus	rs34542479	20	33790120	G	-0.00069532	0.091519	0.438058	0.6873	0.988825	0.984
E11 Non-insulin-dependent diabetes mellitus	rs8114671	20	33789142	A	-0.00069297	0.092346	0.437865	0.6874	0.990913	0.984
E11 Non-insulin-dependent diabetes mellitus	rs2093058	20	33791281	A	-0.00068589	0.09635	0.43793	0.687	0.986964	0.984
E11 Non-insulin-dependent diabetes mellitus	rs35193912	20	33785050	T	-0.00068342	0.097133	0.435823	0.6441	0.990929	0.984
E11 Non-insulin-dependent diabetes mellitus	rs6142327	20	33793147	A	-0.00068501	0.097369	0.438379	0.7823	0.982642	0.984
E11 Non-insulin-dependent diabetes mellitus	rs35381853	20	33790171	C	-0.00068078	0.098535	0.437973	0.6848	0.988635	0.984
E11 Non-insulin-dependent diabetes mellitus	rs6087644	20	33480917	C	0.00069375	0.099579	0.37416	0.8582	0.995165	1.02
E11 Non-insulin-dependent diabetes mellitus	rs6141534	20	33704836	T	-0.00067059	0.10275	0.433197	0.6589	0.997931	0.984
E11 Non-insulin-dependent diabetes mellitus	rs6059743	20	32847711	G	0.00067418	0.10291	0.4169	0.3871	genotyped	1.02
E11 Non-insulin-dependent diabetes mellitus	rs734111	20	33533736	C	0.00068117	0.10498	0.379271	0.7001	0.995412	1.02
E11 Non-insulin-dependent diabetes mellitus	rs12481169	20	33794510	C	-0.00066474	0.10781	0.438594	0.8885	0.981619	0.984
E11 Non-insulin-dependent diabetes mellitus	rs945959	20	33734905	C	0.00065508	0.10813	0.475201	0.1787	0.999205	1.02
E11 Non-insulin-dependent diabetes mellitus	rs6088730	20	33733704	G	0.00065464	0.10835	0.475202	0.1821	0.999341	1.02
E11 Non-insulin-dependent diabetes mellitus	rs6060267	20	33734012	G	0.00065432	0.10853	0.475206	0.1821	0.99931	1.02
E11 Non-insulin-dependent diabetes mellitus	rs1415771	20	33734493	A	0.00064924	0.11133	0.475146	0.1866	0.999111	1.02
E11 Non-insulin-dependent diabetes mellitus	rs6060268	20	33734293	C	0.00064913	0.11138	0.475147	0.1866	0.999144	1.02
E11 Non-insulin-dependent diabetes mellitus	rs1124511	20	33736697	C	0.0006491	0.11145	0.475183	0.1854	0.998852	1.02
E11 Non-insulin-dependent diabetes mellitus	rs6060112	20	33489276	T	0.00066725	0.11178	0.377645	0.8759	0.999736	1.02
E11 Non-insulin-dependent diabetes mellitus	rs6142129	20	32819871	G	-0.00069354	0.11243	0.320377	0.8538	0.996431	0.984
E11 Non-insulin-dependent diabetes mellitus	rs2064454	20	33496169	T	0.00066328	0.11395	0.377642	0.8788	0.9996	1.02
E11 Non-insulin-dependent diabetes mellitus	rs6120757	20	33488771	T	0.00066304	0.11402	0.377904	0.8703	0.999452	1.02
E11 Non-insulin-dependent diabetes mellitus	rs2273683	20	33509523	T	0.0006631	0.11406	0.37764	0.8788	0.999598	1.02
E11 Non-insulin-dependent diabetes mellitus	rs6088618	20	33409350	A	0.00064711	0.11465	0.437675	0.2583	0.9982	1.02
E11 Non-insulin-dependent diabetes mellitus	rs4911452	20	33526983	C	0.00066133	0.11482	0.379959	0.6611	0.998898	1.02
E11 Non-insulin-dependent diabetes mellitus	rs6060107	20	33475601	C	0.00065927	0.11613	0.377679	0.8588	0.999706	1.02
E11 Non-insulin-dependent diabetes mellitus	rs12624640	20	32952125	A	0.00064403	0.1181	0.428495	0.3328	0.996149	1.02
E11 Non-insulin-dependent diabetes mellitus	rs819135	20	32847767	G	-0.00064145	0.12044	0.416849	0.534	0.998932	0.985
E11 Non-insulin-dependent diabetes mellitus	rs2180568	20	33794794	G	-0.00064108	0.12103	0.438102	0.933	0.98127	0.985
E11 Non-insulin-dependent diabetes mellitus	rs6142329	20	33795623	G	-0.00064117	0.12118	0.439235	0.8995	0.979456	0.985
E11 Non-insulin-dependent diabetes mellitus	rs6087654	20	33522142	C	0.00064928	0.12189	0.378549	0.8107	0.998379	1.02
E11 Non-insulin-dependent diabetes mellitus	rs6120758	20	33492523	T	0.00065075	0.1221	0.3788	0.258	genotyped	1.02
E11 Non-insulin-dependent diabetes mellitus	rs6087653	20	33522054	C	0.00064751	0.12288	0.378719	0.7995	0.998433	1.02
E11 Non-insulin-dependent diabetes mellitus	rs6087652	20	33520802	A	0.00064722	0.12305	0.378731	0.8023	0.998415	1.02
E11 Non-insulin-dependent diabetes mellitus	rs7263157	20	33459127	A	0.00064738	0.1231	0.377776	0.8702	0.997973	1.02
E11 Non-insulin-dependent diabetes mellitus	rs6119545	20	33522869	C	0.00064636	0.12355	0.378712	0.8107	0.998439	1.02
E11 Non-insulin-dependent diabetes mellitus	rs56020497	20	33166470	T	-0.0010177	0.12516	0.104753	0.7172	0.999679	0.976
E11 Non-insulin-dependent diabetes mellitus	rs1885120	20	33576989	G	0.0010482	0.12558	0.0994682	0.8121	0.983635	1.03
E11 Non-insulin-dependent diabetes mellitus	rs6142206	20	33212055	G	-0.00063255	0.12559	0.4219	0.06926	genotyped	0.985
E11 Non-insulin-dependent diabetes mellitus	rs17305573	20	33180152	C	-0.0010153	0.12604	0.105156	0.6838	0.995932	0.976
E11 Non-insulin-dependent diabetes mellitus	rs4616	20	33590358	T	-0.00062638	0.12735	0.432631	0.5971	0.99913	0.985
E11 Non-insulin-dependent diabetes mellitus	rs3787214	20	33500245	A	0.00063971	0.12738	0.378738	0.8904	0.998643	1.02
E11 Non-insulin-dependent diabetes mellitus	rs926734	20	33491700	T	0.00063956	0.12749	0.379647	0.974	0.997537	1.02
E11 Non-insulin-dependent diabetes mellitus	rs2378293	20	33499052	G	0.00063929	0.12762	0.378723	0.8904	0.998705	1.02
E11 Non-insulin-dependent diabetes mellitus	rs8183502	20	32805399	A	-0.00067253	0.12794	0.310408	0.3482	0.991902	0.984
E11 Non-insulin-dependent diabetes mellitus	rs6119536	20	33450041	T	0.00063945	0.1282	0.377598	0.9768	0.995407	1.02
E11 Non-insulin-dependent diabetes mellitus	rs6088642	20	33483186	T	0.00063785	0.12833	0.378353	0.8875	0.999858	1.02
E11 Non-insulin-dependent diabetes mellitus	rs6120754	20	33482189	A	0.00063718	0.12873	0.37835	0.8875	0.999868	1.02
E11 Non-insulin-dependent diabetes mellitus	rs6119543	20	33484757	T	0.00063685	0.12889	0.378528	0.8818	0.999917	1.02
E11 Non-insulin-dependent diabetes mellitus	rs13042358	20	33634479	A	-0.00062372	0.12897	0.432578	0.6562	0.999323	0.985
E11 Non-insulin-dependent diabetes mellitus	rs2378294	20	33500378	A	0.00063666	0.12917	0.378896	0.8875	0.998681	1.02
E11 Non-insulin-dependent diabetes mellitus	rs725521	20	33516071	C	0.00063614	0.12941	0.378583	0.8703	0.999427	1.02
E11 Non-insulin-dependent diabetes mellitus	rs6088653	20	33520321	C	0.00063598	0.12954	0.378435	0.876	0.999326	1.02
E11 Non-insulin-dependent diabetes mellitus	rs2207147	20	33488013	A	0.0006358	0.12955	0.378496	0.8818	0.99988	1.02
E11 Non-insulin-dependent diabetes mellitus	rs6120756	20	33486596	A	0.00063558	0.12966	0.378515	0.8818	0.999954	1.02
E11 Non-insulin-dependent diabetes mellitus	rs6119542	20	33484545	T	0.00063537	0.12979	0.378517	0.8789	0.999918	1.02
E11 Non-insulin-dependent diabetes mellitus	rs2065003	20	33538521	G	0.00063254	0.12982	0.391959	0.6335	0.995552	1.02
E11 Non-insulin-dependent diabetes mellitus	rs6142290	20	33654672	C	-0.00062201	0.13014	0.432532	0.6165	0.998684	0.985
E11 Non-insulin-dependent diabetes mellitus	rs4911447	20	33479445	A	0.00063458	0.13031	0.378356	0.8903	0.999809	1.02
E11 Non-insulin-dependent diabetes mellitus	rs6087649	20	33510662	G	0.0006347	0.13035	0.378508	0.8789	0.999095	1.02
E11 Non-insulin-dependent diabetes mellitus	rs2145559	20	33651725	A	-0.00062172	0.13035	0.432565	0.6214	0.998419	0.985
E11 Non-insulin-dependent diabetes mellitus	rs4911449	20	33512236	G	0.00063458	0.13037	0.378429	0.8789	0.999406	1.02
E11 Non-insulin-dependent diabetes mellitus	rs6120763	20	33506400	G	0.00063444	0.1305	0.378386	0.8817	0.999248	1.02
E11 Non-insulin-dependent diabetes mellitus	rs6088646	20	33505937	C	0.00063432	0.13054	0.378416	0.876	0.999352	1.02
E11 Non-insulin-dependent diabetes mellitus	rs3746450	20	33508588	T	0.00063378	0.13089	0.378471	0.8789	0.99924	1.02
E11 Non-insulin-dependent diabetes mellitus	rs6058146	20	33540529	G	0.00063078	0.13089	0.391987	0.6361	0.995594	1.02
E11 Non-insulin-dependent diabetes mellitus	rs7266550	20	33495510	T	0.00063286	0.13138	0.378593	0.876	0.999481	1.02
E11 Non-insulin-dependent diabetes mellitus	rs6087651	20	33518353	T	0.00063281	0.13142	0.378609	0.8732	0.999422	1.02
E11 Non-insulin-dependent diabetes mellitus	rs6088650	20	33514465	C	0.00063258	0.13156	0.378586	0.8703	0.999421	1.02
E11 Non-insulin-dependent diabetes mellitus	rs3818273	20	33509275	A	0.000632	0.13191	0.378594	0.8732	0.999479	1.02
E11 Non-insulin-dependent diabetes mellitus	rs4911451	20	33512466	G	0.00063193	0.13195	0.378594	0.8732	0.999458	1.02
E11 Non-insulin-dependent diabetes mellitus	rs1060615	20	33478381	G	0.00063134	0.13229	0.378364	0.8817	0.999774	1.02
E11 Non-insulin-dependent diabetes mellitus	rs1407202	20	33651967	T	-0.00061816	0.13279	0.432062	0.6337	0.997443	0.985
E11 Non-insulin-dependent diabetes mellitus	rs6060197	20	33654315	T	-0.00061718	0.13317	0.432639	0.5875	0.998554	0.985
E11 Non-insulin-dependent diabetes mellitus	rs6088664	20	33551100	A	0.00062561	0.13322	0.395763	0.909	0.996258	1.02
E11 Non-insulin-dependent diabetes mellitus	rs6141526	20	33615255	T	-0.00061625	0.13361	0.432418	0.6764	0.999218	0.985
E11 Non-insulin-dependent diabetes mellitus	rs3761143	20	33545745	T	0.00062388	0.1344	0.395826	0.8247	0.995806	1.01
E11 Non-insulin-dependent diabetes mellitus	rs6060199	20	33654773	G	-0.00061507	0.13447	0.432646	0.5875	0.998731	0.985
E11 Non-insulin-dependent diabetes mellitus	rs2076667	20	33506964	A	0.00062691	0.1351	0.378686	0.8732	0.999127	1.02
E11 Non-insulin-dependent diabetes mellitus	rs6088636	20	33469746	T	0.00062546	0.13593	0.378366	0.8617	0.999805	1.02
E11 Non-insulin-dependent diabetes mellitus	rs1013677	20	33468793	A	0.00062477	0.13636	0.378371	0.8617	0.999802	1.01
E11 Non-insulin-dependent diabetes mellitus	rs6087643	20	33474462	T	0.00062385	0.1369	0.378535	0.8646	0.999856	1.01
E11 Non-insulin-dependent diabetes mellitus	rs6088640	20	33472509	T	0.00062373	0.13697	0.378538	0.8646	0.999904	1.01
E11 Non-insulin-dependent diabetes mellitus	rs6087642	20	33468306	C	0.00062306	0.13748	0.378317	0.8703	0.99963	1.01
E11 Non-insulin-dependent diabetes mellitus	rs3746432	20	33592763	T	-0.00060943	0.13801	0.434287	0.5852	0.998267	0.986
E11 Non-insulin-dependent diabetes mellitus	rs1984588	20	33435874	C	0.00062335	0.13815	0.377392	0.9797	0.995584	1.01
E11 Non-insulin-dependent diabetes mellitus	rs2038503	20	33675900	A	-0.00060828	0.1389	0.433013	0.7305	0.997893	0.986
E11 Non-insulin-dependent diabetes mellitus	rs6087641	20	33467717	C	0.00062042	0.13913	0.378483	0.8674	0.999665	1.01
E11 Non-insulin-dependent diabetes mellitus	rs6142284	20	33641367	A	-0.0006041	0.14142	0.432769	0.6765	0.999353	0.986
E11 Non-insulin-dependent diabetes mellitus	rs3803936	20	33632775	C	-0.00060384	0.14152	0.432924	0.6314	0.999619	0.986
E11 Non-insulin-dependent diabetes mellitus	rs2104084	20	33649217	C	-0.00060318	0.1421	0.432827	0.6613	0.998905	0.986
E11 Non-insulin-dependent diabetes mellitus	rs4621232	20	33662737	T	0.00098829	0.14357	0.10199	0.8677	0.986792	1.02
E11 Non-insulin-dependent diabetes mellitus	rs6088655	20	33527838	G	0.00061216	0.14457	0.3801	0.4445	genotyped	1.01
E11 Non-insulin-dependent diabetes mellitus	rs2104083	20	33649133	A	-0.00059926	0.14469	0.432723	0.674	0.999037	0.986
E11 Non-insulin-dependent diabetes mellitus	rs62211621	20	33411661	C	-0.00097999	0.1447	0.10356	0.841	0.984754	0.977
E11 Non-insulin-dependent diabetes mellitus	rs6142280	20	33622242	C	-0.00059764	0.14573	0.432846	0.6215	0.999194	0.986
E11 Non-insulin-dependent diabetes mellitus	rs6141523	20	33569417	A	-0.00059807	0.14577	0.429628	0.6332	0.999501	0.986
E11 Non-insulin-dependent diabetes mellitus	rs6120778	20	33565169	C	0.00059815	0.14632	0.4297	0.1762	genotyped	1.01
E11 Non-insulin-dependent diabetes mellitus	rs62211619	20	33410931	A	-0.00097275	0.14734	0.103736	0.8055	0.985022	0.977
E11 Non-insulin-dependent diabetes mellitus	rs2057324	20	33656561	A	-0.00059527	0.14745	0.432811	0.6117	0.998709	0.986
E11 Non-insulin-dependent diabetes mellitus	rs6142294	20	33671497	G	-0.00059515	0.14795	0.431917	0.7383	0.996808	0.986
E11 Non-insulin-dependent diabetes mellitus	rs745849	20	33572178	A	-0.00059388	0.14868	0.429581	0.6086	0.999208	0.986
E11 Non-insulin-dependent diabetes mellitus	rs6120663	20	33081906	A	0.00059267	0.14875	0.439027	0.3116	0.997583	1.01
E11 Non-insulin-dependent diabetes mellitus	rs17404569	20	33674077	C	-0.00059326	0.14882	0.43319	0.6289	0.99846	0.986
E11 Non-insulin-dependent diabetes mellitus	rs734308	20	33572096	G	-0.00059359	0.14889	0.429576	0.5989	0.999015	0.986
E11 Non-insulin-dependent diabetes mellitus	rs4911461	20	33629993	C	-0.00059118	0.1501	0.432919	0.674	0.999363	0.986
E11 Non-insulin-dependent diabetes mellitus	rs6060140	20	33566507	A	0.00059213	0.15046	0.428847	0.6989	0.99661	1.01
E11 Non-insulin-dependent diabetes mellitus	rs6060168	20	33621017	C	-0.00058945	0.15133	0.433066	0.624	0.999226	0.986
E11 Non-insulin-dependent diabetes mellitus	rs55695988	20	33090447	A	-0.00093607	0.15137	0.109646	0.1858	0.995094	0.978
E11 Non-insulin-dependent diabetes mellitus	rs2038504	20	33648187	C	-0.00058923	0.15153	0.43285	0.6689	0.999049	0.986
E11 Non-insulin-dependent diabetes mellitus	rs2425012	20	33581955	A	-0.00058852	0.15195	0.433035	0.6842	0.99919	0.986
E11 Non-insulin-dependent diabetes mellitus	rs6060130	20	33549319	T	0.00059561	0.1535	0.392758	0.6989	0.996082	1.01
E11 Non-insulin-dependent diabetes mellitus	rs2425006	20	33571228	G	-0.00058486	0.15497	0.429889	0.6357	0.999038	0.986
E11 Non-insulin-dependent diabetes mellitus	rs6142276	20	33620332	C	-0.0005838	0.1552	0.433092	0.6413	0.999592	0.986
E11 Non-insulin-dependent diabetes mellitus	rs1544047	20	33670753	C	-0.00058374	0.15557	0.432857	0.5828	0.998139	0.986
E11 Non-insulin-dependent diabetes mellitus	rs8122889	20	33424151	G	0.00059368	0.15646	0.384905	0.7753	0.995263	1.01
E11 Non-insulin-dependent diabetes mellitus	rs1885114	20	33577361	G	-0.00058175	0.15717	0.434212	0.757	0.996112	0.986
E11 Non-insulin-dependent diabetes mellitus	rs66535333	20	33656666	A	-0.00058041	0.15782	0.432931	0.6142	0.998694	0.986
E11 Non-insulin-dependent diabetes mellitus	rs2378262	20	33550774	G	0.00058864	0.15835	0.392536	0.7363	0.996453	1.01
E11 Non-insulin-dependent diabetes mellitus	rs6088666	20	33564570	G	0.0005799	0.1584	0.429787	0.6407	0.999611	1.01
E11 Non-insulin-dependent diabetes mellitus	rs6058154	20	33585834	A	-0.00057912	0.15853	0.433059	0.6314	0.999687	0.986
E11 Non-insulin-dependent diabetes mellitus	rs6058161	20	33620026	T	-0.00057871	0.15887	0.432939	0.6488	0.999471	0.986
E11 Non-insulin-dependent diabetes mellitus	rs6060165	20	33619480	C	-0.00057843	0.15904	0.433159	0.6339	0.999453	0.986
E11 Non-insulin-dependent diabetes mellitus	rs6060003	20	33294945	T	-0.000577	0.15905	0.4473	0.8331	genotyped	0.986
E11 Non-insulin-dependent diabetes mellitus	rs6142285	20	33643640	G	-0.00059362	0.15994	0.381515	0.3016	0.982933	0.986
E11 Non-insulin-dependent diabetes mellitus	rs6088623	20	33429684	C	0.00058669	0.16139	0.384805	0.7644	0.995296	1.01
E11 Non-insulin-dependent diabetes mellitus	rs6060139	20	33566499	C	0.0005745	0.16297	0.429033	0.717	0.996831	1.01
E11 Non-insulin-dependent diabetes mellitus	rs13044413	20	33020957	G	0.00057292	0.16299	0.439666	0.2543	0.99617	1.01
E11 Non-insulin-dependent diabetes mellitus	rs3761144	20	33544075	G	0.00058013	0.16472	0.39263	0.6962	0.995109	1.01
E11 Non-insulin-dependent diabetes mellitus	rs3736802	20	33604042	C	-0.00056456	0.16555	0.484136	0.4689	0.999592	0.987
E11 Non-insulin-dependent diabetes mellitus	rs62212235	20	33082171	T	-0.0008871	0.1715	0.11016	0.8219	1	0.979
E11 Non-insulin-dependent diabetes mellitus	rs4911466	20	33690010	T	0.00092452	0.17952	0.0988132	0.8934	0.976478	1.02
E11 Non-insulin-dependent diabetes mellitus	rs6087633	20	33408137	G	0.00055354	0.18701	0.379196	0.7858	0.998511	1.01
E11 Non-insulin-dependent diabetes mellitus	rs2425005	20	33407715	C	0.0005494	0.19037	0.379005	0.7774	0.998221	1.01
E11 Non-insulin-dependent diabetes mellitus	rs7262274	20	33413176	C	0.00054946	0.19048	0.379091	0.7914	0.997627	1.01
E11 Non-insulin-dependent diabetes mellitus	rs959829	20	33346047	C	-0.00054129	0.19709	0.378983	0.7606	0.997926	0.987
E11 Non-insulin-dependent diabetes mellitus	rs13044899	20	33287078	A	0.0005309	0.19793	0.436485	0.7021	0.988654	1.01
E11 Non-insulin-dependent diabetes mellitus	rs6141513	20	33374402	C	-0.00053983	0.1982	0.379133	0.7773	0.998337	0.987
E11 Non-insulin-dependent diabetes mellitus	rs73610830	20	32863523	G	-0.00055286	0.20782	0.320551	0.4441	0.987163	0.987
E11 Non-insulin-dependent diabetes mellitus	rs2295352	20	33320055	G	-0.00052842	0.20796	0.378589	0.7141	0.998281	0.987
E11 Non-insulin-dependent diabetes mellitus	rs6060001	20	33294353	G	0.00051406	0.20931	0.445114	0.4011	0.998579	1.01
E11 Non-insulin-dependent diabetes mellitus	rs6058107	20	33288546	C	0.00059102	0.22054	0.232474	0.8215	0.995375	1.01
E11 Non-insulin-dependent diabetes mellitus	rs3746438	20	33584289	C	0.00050174	0.22218	0.4404	0.02813	genotyped	1.01
E11 Non-insulin-dependent diabetes mellitus	rs6088622	20	33419977	A	0.00050358	0.23014	0.380911	0.6953	0.996039	1.01
E11 Non-insulin-dependent diabetes mellitus	rs1205347	20	32912050	T	-0.00048793	0.23142	0.492749	0.7021	0.996221	0.988
E11 Non-insulin-dependent diabetes mellitus	rs1205336	20	32926336	A	-0.00048812	0.23193	0.496187	0.7118	0.993287	0.988
E11 Non-insulin-dependent diabetes mellitus	rs1205346	20	32914269	T	-0.00048312	0.23591	0.49003	0.9021	0.996425	0.989
E11 Non-insulin-dependent diabetes mellitus	rs1205340	20	32923871	A	-0.0004805	0.23945	0.496008	0.7118	0.992426	0.989
E11 Non-insulin-dependent diabetes mellitus	rs6059909	20	33139691	A	0.00047762	0.24299	0.486502	0.6002	0.990408	1.01
E11 Non-insulin-dependent diabetes mellitus	rs1205337	20	32926041	A	-0.00046914	0.24952	0.490297	0.8886	0.99765	0.989
E11 Non-insulin-dependent diabetes mellitus	rs1205345	20	32914699	C	-0.00046832	0.25059	0.48927	0.9157	0.996435	0.989
E11 Non-insulin-dependent diabetes mellitus	rs1205338	20	32925625	G	-0.00046414	0.25459	0.49028	0.9022	0.997603	0.989
E11 Non-insulin-dependent diabetes mellitus	rs6058064	20	33086622	G	0.0004628	0.25617	0.49279	0.7301	0.997714	1.01
E11 Non-insulin-dependent diabetes mellitus	rs1205344	20	32918298	A	-0.00046171	0.25753	0.491698	0.7847	0.995864	0.989
E11 Non-insulin-dependent diabetes mellitus	rs6120675	20	33138870	C	0.00046154	0.25823	0.486867	0.6965	0.993998	1.01
E11 Non-insulin-dependent diabetes mellitus	rs2424999	20	33386430	A	0.00047441	0.25979	0.377224	0.6999	0.993514	1.01
E11 Non-insulin-dependent diabetes mellitus	rs1205342	20	32921842	T	-0.0004568	0.26232	0.490058	0.8886	0.996977	0.989
E11 Non-insulin-dependent diabetes mellitus	rs1205341	20	32923476	C	-0.00045603	0.26308	0.489973	0.9238	0.997114	0.989
E11 Non-insulin-dependent diabetes mellitus	rs4258875	20	32924895	A	-0.00045519	0.26389	0.490313	0.9103	0.997439	0.989
E11 Non-insulin-dependent diabetes mellitus	rs6088638	20	33470514	C	0.00059841	0.26706	0.17391	0.0972	0.992771	1.01
E11 Non-insulin-dependent diabetes mellitus	rs1205334	20	32930369	C	-0.00045079	0.26845	0.490224	0.9456	0.997995	0.989
E11 Non-insulin-dependent diabetes mellitus	rs7271970	20	32987666	G	-0.00044777	0.27173	0.49449	0.7638	0.998345	0.989
E11 Non-insulin-dependent diabetes mellitus	rs6059913	20	33143288	A	0.00044825	0.27235	0.485679	0.6195	0.99385	1.01
E11 Non-insulin-dependent diabetes mellitus	rs11167239	20	33140472	A	0.00044778	0.27295	0.48571	0.6292	0.993389	1.01
E11 Non-insulin-dependent diabetes mellitus	rs1205343	20	32921602	G	-0.00044336	0.27667	0.48957	0.8698	0.996909	0.989
E11 Non-insulin-dependent diabetes mellitus	rs6059918	20	33150503	T	0.00044339	0.27715	0.48687	0.7374	0.995191	1.01
E11 Non-insulin-dependent diabetes mellitus	rs2378133	20	32919505	G	-0.00044221	0.27796	0.489519	0.8698	0.996576	0.99
E11 Non-insulin-dependent diabetes mellitus	rs2378134	20	32938085	T	-0.00044159	0.27818	0.490687	0.8779	0.998767	0.99
E11 Non-insulin-dependent diabetes mellitus	rs6058041	20	33018008	G	0.00044109	0.27868	0.49378	0.6821	0.999731	1.01
E11 Non-insulin-dependent diabetes mellitus	rs4911151	20	32932273	C	-0.00044103	0.27874	0.490651	0.8941	0.999	0.99
E11 Non-insulin-dependent diabetes mellitus	rs12480410	20	32988678	T	-0.00044101	0.27905	0.494503	0.7482	0.998296	0.99
E11 Non-insulin-dependent diabetes mellitus	rs6059824	20	33014543	C	0.0004407	0.2791	0.493768	0.6871	0.999819	1.01
E11 Non-insulin-dependent diabetes mellitus	rs1890002	20	32919219	G	-0.00044062	0.27969	0.489472	0.9021	0.996555	0.99
E11 Non-insulin-dependent diabetes mellitus	rs6088475	20	32964987	C	-0.00043992	0.27996	0.49372	0.7328	0.99948	0.99
E11 Non-insulin-dependent diabetes mellitus	rs4142007	20	32990050	T	-0.00044004	0.28017	0.494425	0.7586	0.997736	0.99
E11 Non-insulin-dependent diabetes mellitus	rs62212172	20	32987705	A	-0.00043975	0.2804	0.494521	0.7431	0.998165	0.99
E11 Non-insulin-dependent diabetes mellitus	rs6142153	20	32968747	G	-0.00043928	0.28063	0.493745	0.7277	0.999515	0.99
E11 Non-insulin-dependent diabetes mellitus	rs6088471	20	32932643	A	-0.00043916	0.28081	0.49069	0.8914	0.99896	0.99
E11 Non-insulin-dependent diabetes mellitus	rs7271144	20	32948885	C	-0.00043906	0.28094	0.492616	0.6997	0.998958	0.99
E11 Non-insulin-dependent diabetes mellitus	rs6141465	20	32967314	C	-0.00043802	0.28201	0.49372	0.7354	0.999315	0.99
E11 Non-insulin-dependent diabetes mellitus	rs6087588	20	33066369	C	0.00043798	0.28205	0.493689	0.7277	0.99963	1.01
E11 Non-insulin-dependent diabetes mellitus	rs6059875	20	33086090	G	0.00043783	0.2822	0.493655	0.7509	0.999403	1.01
E11 Non-insulin-dependent diabetes mellitus	rs6059867	20	33078103	T	0.00043738	0.2827	0.493659	0.7561	0.999361	1.01
E11 Non-insulin-dependent diabetes mellitus	rs6058052	20	33047084	G	0.00043718	0.28298	0.493709	0.6871	0.999641	1.01
E11 Non-insulin-dependent diabetes mellitus	rs6058070	20	33103521	C	0.00043627	0.28392	0.493639	0.79	0.999366	1.01
E11 Non-insulin-dependent diabetes mellitus	rs6142159	20	32993035	A	-0.00043627	0.28403	0.493615	0.7431	0.998837	0.99
E11 Non-insulin-dependent diabetes mellitus	rs6088502	20	33037644	T	0.00043597	0.28426	0.493646	0.6972	0.999666	1.01
E11 Non-insulin-dependent diabetes mellitus	rs6059856	20	33057954	C	0.0004357	0.28457	0.49367	0.6921	0.999587	1.01
E11 Non-insulin-dependent diabetes mellitus	rs1569780	20	33429907	C	0.00044852	0.28506	0.395281	0.9139	0.983867	1.01
E11 Non-insulin-dependent diabetes mellitus	rs6142157	20	32984172	G	-0.00043374	0.28674	0.493755	0.7406	0.99933	0.99
E11 Non-insulin-dependent diabetes mellitus	rs6059896	20	33111783	C	0.00043228	0.28848	0.493567	0.7717	0.998892	1.01
E11 Non-insulin-dependent diabetes mellitus	rs6088512	20	33095891	A	0.00043195	0.2888	0.493526	0.7795	0.999046	1.01
E11 Non-insulin-dependent diabetes mellitus	rs6059880	20	33088669	A	0.00043196	0.28895	0.492412	0.8778	0.99775	1.01
E11 Non-insulin-dependent diabetes mellitus	rs13043505	20	32946905	T	-0.00042911	0.29275	0.491378	0.9864	0.995649	0.99
E11 Non-insulin-dependent diabetes mellitus	rs4911153	20	32961547	T	-0.00042699	0.29431	0.493551	0.7639	0.99954	0.99
E11 Non-insulin-dependent diabetes mellitus	rs6059905	20	33126946	C	0.00042741	0.29464	0.490892	0.9536	0.995855	1.01
E11 Non-insulin-dependent diabetes mellitus	rs11700221	20	32940320	C	-0.00042668	0.29472	0.490147	0.8914	0.99903	0.99
E11 Non-insulin-dependent diabetes mellitus	rs6058040	20	33013751	G	0.00042577	0.29565	0.491266	0.9483	0.999265	1.01
E11 Non-insulin-dependent diabetes mellitus	rs73106933	20	33287425	C	0.00042819	0.29632	0.451384	0.6095	0.992839	1.01
E11 Non-insulin-dependent diabetes mellitus	rs6059827	20	33016358	A	0.00042512	0.29633	0.49117	0.932	0.999636	1.01
E11 Non-insulin-dependent diabetes mellitus	rs6119497	20	33012529	A	0.00042454	0.29704	0.49108	0.9428	0.999389	1.01
E11 Non-insulin-dependent diabetes mellitus	rs6059868	20	33079460	G	0.00042437	0.29716	0.491189	0.9864	0.999521	1.01
E11 Non-insulin-dependent diabetes mellitus	rs6088528	20	33156742	A	0.00042516	0.29743	0.485807	0.6442	0.995157	1.01
E11 Non-insulin-dependent diabetes mellitus	rs13043504	20	32946904	C	-0.00042454	0.2975	0.490645	0.9455	0.997468	0.99
E11 Non-insulin-dependent diabetes mellitus	rs2424992	20	33012060	T	0.0004239	0.29779	0.491057	0.9428	0.999344	1.01
E11 Non-insulin-dependent diabetes mellitus	rs6088483	20	32984714	A	-0.00042309	0.29864	0.491274	0.9646	0.999341	0.99
E11 Non-insulin-dependent diabetes mellitus	rs13040777	20	33286908	A	0.00042543	0.29891	0.451862	0.5836	0.995132	1.01
E11 Non-insulin-dependent diabetes mellitus	rs6059829	20	33017074	A	0.00042279	0.29897	0.49113	0.9374	0.999646	1.01
E11 Non-insulin-dependent diabetes mellitus	rs6059872	20	33082775	A	0.00042251	0.29928	0.491021	0.9782	0.999666	1.01
E11 Non-insulin-dependent diabetes mellitus	rs6088484	20	32985961	C	-0.00042253	0.29928	0.49128	0.9646	0.999353	0.99
E11 Non-insulin-dependent diabetes mellitus	rs6058073	20	33116483	C	0.0004225	0.29937	0.491039	0.9809	0.999085	1.01
E11 Non-insulin-dependent diabetes mellitus	rs4277599	20	33008905	C	-0.00042245	0.29938	0.491297	0.97	0.999428	0.99
E11 Non-insulin-dependent diabetes mellitus	rs6120650	20	33039973	A	0.00042225	0.29958	0.491021	0.9293	0.999731	1.01
E11 Non-insulin-dependent diabetes mellitus	rs6088508	20	33060081	G	0.00042201	0.29992	0.491155	0.9973	0.998882	1.01
E11 Non-insulin-dependent diabetes mellitus	rs6058059	20	33070159	T	0.00042183	0.30005	0.491029	0.9782	0.999648	1.01
E11 Non-insulin-dependent diabetes mellitus	rs6120666	20	33090718	G	0.00042173	0.3002	0.490966	0.9946	0.999296	1.01
E11 Non-insulin-dependent diabetes mellitus	rs6059851	20	33047945	A	0.00042167	0.30023	0.491168	0.9564	0.999511	1.01
E11 Non-insulin-dependent diabetes mellitus	rs6059890	20	33101653	C	0.00042154	0.30039	0.491187	0.9946	0.999217	1.01
E11 Non-insulin-dependent diabetes mellitus	rs6058057	20	33065283	A	0.00042145	0.30049	0.491033	0.9918	0.999619	1.01
E11 Non-insulin-dependent diabetes mellitus	rs6059835	20	33020141	G	0.00042129	0.3007	0.491142	0.9266	0.999664	1.01
E11 Non-insulin-dependent diabetes mellitus	rs6059834	20	33019299	G	0.00042127	0.30075	0.49117	0.9293	0.999561	1.01
E11 Non-insulin-dependent diabetes mellitus	rs4911420	20	32998654	C	-0.00042122	0.30086	0.491168	0.9728	0.999074	0.99
E11 Non-insulin-dependent diabetes mellitus	rs6059887	20	33101102	G	0.00042118	0.30086	0.490931	0.9918	0.999283	1.01
E11 Non-insulin-dependent diabetes mellitus	rs8125522	20	32992324	C	-0.00042122	0.30086	0.491167	0.9728	0.999027	0.99
E11 Non-insulin-dependent diabetes mellitus	rs2378204	20	33067904	G	0.00042104	0.30096	0.491039	0.9864	0.999595	1.01
E11 Non-insulin-dependent diabetes mellitus	rs6059897	20	33113224	G	0.0004209	0.30121	0.491221	0.9891	0.998943	1.01
E11 Non-insulin-dependent diabetes mellitus	rs4911417	20	32970606	G	-0.00042081	0.30124	0.491268	0.9619	0.999429	0.99
E11 Non-insulin-dependent diabetes mellitus	rs6088478	20	32971719	C	-0.00042073	0.30133	0.491266	0.9619	0.999426	0.99
E11 Non-insulin-dependent diabetes mellitus	rs6059840	20	33030405	A	0.00042072	0.30136	0.491157	0.9293	0.999638	1.01
E11 Non-insulin-dependent diabetes mellitus	rs6120644	20	33023810	A	0.00042073	0.30137	0.491143	0.9293	0.999583	1.01
E11 Non-insulin-dependent diabetes mellitus	rs2144717	20	33076333	G	0.0004206	0.30152	0.490954	0.9946	0.999226	1.01
E11 Non-insulin-dependent diabetes mellitus	rs6059845	20	33036500	A	0.00042056	0.30154	0.491197	0.9211	0.999535	1.01
E11 Non-insulin-dependent diabetes mellitus	rs6087579	20	32985155	G	-0.00042041	0.30172	0.491304	0.9592	0.999044	0.99
E11 Non-insulin-dependent diabetes mellitus	rs6059892	20	33105766	G	0.00042038	0.30173	0.491039	0.9973	0.999384	1.01
E11 Non-insulin-dependent diabetes mellitus	rs6120645	20	33025171	T	0.00042034	0.3018	0.49114	0.9293	0.999653	1.01
E11 Non-insulin-dependent diabetes mellitus	rs6059866	20	33075810	G	0.00042041	0.30185	0.491248	1	0.998904	1.01
E11 Non-insulin-dependent diabetes mellitus	rs6059882	20	33090167	C	0.00042026	0.30187	0.491235	0.9782	0.999155	1.01
E11 Non-insulin-dependent diabetes mellitus	rs11546155	20	33451148	A	-0.00058796	0.30193	0.162815	0.9493	0.929391	0.986
E11 Non-insulin-dependent diabetes mellitus	rs2889850	20	33010647	C	-0.0004202	0.30194	0.49114	0.9673	0.999639	0.99
E11 Non-insulin-dependent diabetes mellitus	rs6141469	20	33004002	C	-0.00042018	0.30197	0.491144	0.9619	0.999588	0.99
E11 Non-insulin-dependent diabetes mellitus	rs6120668	20	33099793	G	0.00041964	0.30268	0.490914	1	0.998964	1.01
E11 Non-insulin-dependent diabetes mellitus	rs6087574	20	32948753	C	-0.00041958	0.30275	0.489982	0.9265	0.999477	0.99
E11 Non-insulin-dependent diabetes mellitus	rs945674	20	32964247	C	-0.00041941	0.30287	0.491104	0.9564	0.999557	0.99
E11 Non-insulin-dependent diabetes mellitus	rs6058094	20	33224174	T	0.00042128	0.30309	0.45053	0.7301	0.998671	1.01
E11 Non-insulin-dependent diabetes mellitus	rs6059863	20	33069600	G	0.00041913	0.30317	0.491234	0.9891	0.999206	1.01
E11 Non-insulin-dependent diabetes mellitus	rs1890000	20	32968312	T	-0.00041891	0.30345	0.491311	0.9483	0.999232	0.99
E11 Non-insulin-dependent diabetes mellitus	rs4911418	20	32994257	A	-0.00041886	0.30356	0.49101	0.9728	0.999318	0.99
E11 Non-insulin-dependent diabetes mellitus	rs4911419	20	32995873	A	-0.00041886	0.30356	0.49101	0.9728	0.999357	0.99
E11 Non-insulin-dependent diabetes mellitus	rs6088489	20	32997945	G	-0.00041885	0.30357	0.49101	0.9728	0.99935	0.99
E11 Non-insulin-dependent diabetes mellitus	rs6579165	20	32994715	G	-0.00041881	0.30362	0.491012	0.97	0.999319	0.99
E11 Non-insulin-dependent diabetes mellitus	rs3761147	20	32996689	T	-0.00041881	0.30363	0.491012	0.9728	0.999307	0.99
E11 Non-insulin-dependent diabetes mellitus	rs6059855	20	33057328	G	0.00041861	0.30375	0.491024	0.9592	0.999687	1.01
E11 Non-insulin-dependent diabetes mellitus	rs4911422	20	32999345	C	-0.00041868	0.30377	0.491014	0.9728	0.99932	0.99
E11 Non-insulin-dependent diabetes mellitus	rs6058029	20	32969643	C	-0.00041858	0.3038	0.49111	0.9619	0.999764	0.99
E11 Non-insulin-dependent diabetes mellitus	rs2184836	20	32963369	G	-0.00041859	0.30381	0.49109	0.9564	0.999673	0.99
E11 Non-insulin-dependent diabetes mellitus	rs6087587	20	33058628	T	0.00041854	0.30383	0.49102	0.9592	0.999696	1.01
E11 Non-insulin-dependent diabetes mellitus	rs6059797	20	32971424	A	-0.00041849	0.3039	0.49111	0.9619	0.99977	0.99
E11 Non-insulin-dependent diabetes mellitus	rs6088479	20	32971736	C	-0.00041848	0.30391	0.49111	0.9646	0.999768	0.99
E11 Non-insulin-dependent diabetes mellitus	rs6059861	20	33068563	T	0.00041837	0.30409	0.491115	1	0.999255	1.01
E11 Non-insulin-dependent diabetes mellitus	rs6087592	20	33114503	G	0.00041842	0.30411	0.491153	0.9946	0.998486	1.01
E11 Non-insulin-dependent diabetes mellitus	rs6059779	20	32950325	T	-0.00041838	0.30414	0.489956	0.932	0.999373	0.99
E11 Non-insulin-dependent diabetes mellitus	rs2378135	20	32962926	C	-0.00041808	0.30439	0.491075	0.9673	0.999643	0.99
E11 Non-insulin-dependent diabetes mellitus	rs6058051	20	33044862	A	0.00041796	0.3045	0.49102	0.9483	0.999732	1.01
E11 Non-insulin-dependent diabetes mellitus	rs6579161	20	32948784	C	-0.00041804	0.3045	0.490003	0.9293	0.999568	0.99
E11 Non-insulin-dependent diabetes mellitus	rs3736762	20	33037336	T	0.00041793	0.30459	0.491076	0.9157	0.999607	1.01
E11 Non-insulin-dependent diabetes mellitus	rs2225837	20	33005634	T	-0.00041783	0.30469	0.491123	0.9619	0.999566	0.99
E11 Non-insulin-dependent diabetes mellitus	rs6088488	20	32992631	C	-0.00041783	0.30475	0.490998	0.9728	0.999448	0.99
E11 Non-insulin-dependent diabetes mellitus	rs6120669	20	33105028	C	0.0004175	0.30507	0.490984	0.9837	0.999229	1.01
E11 Non-insulin-dependent diabetes mellitus	rs4911421	20	32998948	C	-0.00041753	0.30511	0.491019	0.9673	0.999317	0.99
E11 Non-insulin-dependent diabetes mellitus	rs6059843	20	33036128	G	0.00041736	0.30523	0.491235	0.9157	0.999501	1.01
E11 Non-insulin-dependent diabetes mellitus	rs6088527	20	33155841	T	0.00041791	0.30568	0.485678	0.6443	0.995702	1.01
E11 Non-insulin-dependent diabetes mellitus	rs6141471	20	33006730	G	-0.00041664	0.30607	0.491204	0.9918	0.999348	0.99
E11 Non-insulin-dependent diabetes mellitus	rs6059850	20	33044784	G	0.00041644	0.30627	0.491017	0.9592	0.999657	1.01
E11 Non-insulin-dependent diabetes mellitus	rs764597	20	33161225	A	0.00041726	0.30642	0.485678	0.6369	0.995761	1.01
E11 Non-insulin-dependent diabetes mellitus	rs9789792	20	32957709	A	-0.00041628	0.30648	0.491184	0.9973	0.999312	0.99
E11 Non-insulin-dependent diabetes mellitus	rs2295444	20	33173883	T	0.00041693	0.3068	0.485762	0.6127	0.995834	1.01
E11 Non-insulin-dependent diabetes mellitus	rs4911423	20	32999386	A	-0.00041536	0.30763	0.491075	0.9946	0.998994	0.99
E11 Non-insulin-dependent diabetes mellitus	rs1884669	20	33171287	A	0.00041565	0.30827	0.485738	0.6296	0.995829	1.01
E11 Non-insulin-dependent diabetes mellitus	rs6087600	20	33157217	C	0.0004149	0.30917	0.485669	0.6394	0.995704	1.01
E11 Non-insulin-dependent diabetes mellitus	rs6059926	20	33164804	T	0.00040936	0.31565	0.485778	0.674	0.995759	1.01
E11 Non-insulin-dependent diabetes mellitus	rs6059774	20	32935192	G	-0.00040568	0.31922	0.48969	0.9292	0.998194	0.99
E11 Non-insulin-dependent diabetes mellitus	rs6120620	20	32934054	A	-0.00040554	0.31936	0.489695	0.9347	0.998254	0.99
E11 Non-insulin-dependent diabetes mellitus	rs6059893	20	33105897	G	0.00040437	0.32053	0.491302	0.9918	0.999178	1.01
E11 Non-insulin-dependent diabetes mellitus	rs6059844	20	33036482	A	-0.00040531	0.32101	0.4949	0.03668	genotyped	0.99
E11 Non-insulin-dependent diabetes mellitus	rs3746455	20	32957216	A	-0.00040339	0.3217	0.490568	0.97	0.999649	0.99
E11 Non-insulin-dependent diabetes mellitus	rs2378205	20	33110803	G	0.00040326	0.32187	0.491099	0.9946	0.999447	1.01
E11 Non-insulin-dependent diabetes mellitus	rs4911152	20	32955024	C	-0.00039762	0.3287	0.490587	0.9918	0.999401	0.991
E11 Non-insulin-dependent diabetes mellitus	rs6059988	20	33278101	C	0.00040003	0.32875	0.451487	0.5314	0.994957	1.01
E11 Non-insulin-dependent diabetes mellitus	rs6059989	20	33279604	G	0.0003985	0.33059	0.451678	0.4355	0.994878	1.01
E11 Non-insulin-dependent diabetes mellitus	rs114125379	20	33463670	G	0.0020915	0.33195	0.00934866	0.5647	0.947482	1.05
E11 Non-insulin-dependent diabetes mellitus	rs6058105	20	33271719	T	0.00039474	0.33489	0.451579	0.6666	0.996566	1.01
E11 Non-insulin-dependent diabetes mellitus	rs6579186	20	33282198	C	0.00039042	0.34044	0.451942	0.528	0.994993	1.01
E11 Non-insulin-dependent diabetes mellitus	rs6087577	20	32955423	G	-0.00038665	0.34372	0.4897	0.06474	genotyped	0.991
E11 Non-insulin-dependent diabetes mellitus	rs6059991	20	33280836	T	0.00038777	0.3438	0.451849	0.4155	0.994513	1.01
E11 Non-insulin-dependent diabetes mellitus	rs6059992	20	33282275	C	0.00038533	0.34671	0.452218	0.5101	0.994883	1.01
E11 Non-insulin-dependent diabetes mellitus	rs6087580	20	32992592	G	-0.00037993	0.35082	0.490618	0.932	0.998595	0.991
E11 Non-insulin-dependent diabetes mellitus	rs6088498	20	33020446	G	0.0003785	0.35261	0.490737	0.8914	0.998696	1.01
E11 Non-insulin-dependent diabetes mellitus	rs3891369	20	33161127	T	0.00037623	0.35652	0.485299	0.5818	0.995174	1.01
E11 Non-insulin-dependent diabetes mellitus	rs8115656	20	33282780	C	0.0003633	0.37528	0.451292	0.5234	0.994312	1.01
E11 Non-insulin-dependent diabetes mellitus	rs1884667	20	33285505	A	0.00035741	0.38262	0.452209	0.4993	0.995704	1.01
E11 Non-insulin-dependent diabetes mellitus	rs1884668	20	33285514	G	0.00035667	0.38364	0.45214	0.4905	0.995582	1.01
E11 Non-insulin-dependent diabetes mellitus	rs6088580	20	33285053	C	0.00035659	0.3837	0.452179	0.4883	0.995727	1.01
E11 Non-insulin-dependent diabetes mellitus	rs6088536	20	33189106	C	0.00035285	0.38713	0.482728	0.4896	0.996292	1.01
E11 Non-insulin-dependent diabetes mellitus	rs6059938	20	33187130	A	0.00035131	0.3892	0.48275	0.4939	0.996304	1.01
E11 Non-insulin-dependent diabetes mellitus	rs6087605	20	33180624	T	0.00034852	0.39297	0.482677	0.5312	0.996271	1.01
E11 Non-insulin-dependent diabetes mellitus	rs6058084	20	33183804	T	0.00034623	0.39611	0.482691	0.5245	0.996215	1.01
E11 Non-insulin-dependent diabetes mellitus	rs6059932	20	33175466	T	0.00034229	0.40155	0.482864	0.5562	0.995935	1.01
E11 Non-insulin-dependent diabetes mellitus	rs59030726	20	33454117	A	-0.00039323	0.40968	0.239745	0.9551	0.997296	0.991
E11 Non-insulin-dependent diabetes mellitus	rs6059956	20	33220070	C	0.0003335	0.41294	0.484625	0.6943	0.999177	1.01
E11 Non-insulin-dependent diabetes mellitus	rs61655108	20	33455008	A	-0.0003892	0.41454	0.239675	0.9365	0.997352	0.991
E11 Non-insulin-dependent diabetes mellitus	rs7273470	20	33456921	C	-0.0003889	0.41484	0.239698	0.9664	0.99747	0.991
E11 Non-insulin-dependent diabetes mellitus	rs7265109	20	33459354	A	-0.00038699	0.41704	0.239682	0.9776	0.997858	0.991
E11 Non-insulin-dependent diabetes mellitus	rs11697978	20	33460366	C	-0.00038545	0.41889	0.239673	0.9701	0.998018	0.991
E11 Non-insulin-dependent diabetes mellitus	rs62212082	20	33454241	A	-0.00038198	0.423	0.240111	0.9254	0.996729	0.991
E11 Non-insulin-dependent diabetes mellitus	rs17122844	20	33452600	T	-0.00038192	0.42318	0.240034	0.929	0.996427	0.991
E11 Non-insulin-dependent diabetes mellitus	rs62212084	20	33458851	G	-0.0003794	0.42605	0.240047	0.9515	0.997557	0.991
E11 Non-insulin-dependent diabetes mellitus	rs45465702	20	33320571	T	-0.00041958	0.4267	0.1825	0.08978	genotyped	0.99
E11 Non-insulin-dependent diabetes mellitus	rs2295096	20	33464710	G	-0.00037533	0.43116	0.239677	0.9589	0.998254	0.991
E11 Non-insulin-dependent diabetes mellitus	rs72497006	20	32909056	A	-0.00033752	0.44777	0.302752	0.1967	0.993429	0.992
E11 Non-insulin-dependent diabetes mellitus	rs6141488	20	33192746	G	-0.00033126	0.44822	0.32726	0.3667	0.985915	0.992
E11 Non-insulin-dependent diabetes mellitus	rs3053708	20	33575347	CAT	-0.00033715	0.44944	0.3028	4.567e-09	genotyped	0.992
E11 Non-insulin-dependent diabetes mellitus	rs1415775	20	33765771	C	-0.00034028	0.45173	0.2871	0.001419	genotyped	0.992
E11 Non-insulin-dependent diabetes mellitus	rs7268701	20	32901960	T	0.00031315	0.45298	0.441511	0.2835	0.962227	1.01
E11 Non-insulin-dependent diabetes mellitus	rs6088466	20	32913534	A	-0.0003312	0.45597	0.303065	0.1765	0.994651	0.992
E11 Non-insulin-dependent diabetes mellitus	rs6059934	20	33178324	T	0.00030421	0.45598	0.482326	0.4851	0.995768	1.01
E11 Non-insulin-dependent diabetes mellitus	rs150385410	20	33543429	G	0.0016361	0.46001	0.00894007	0.373	0.942515	1.04
E11 Non-insulin-dependent diabetes mellitus	rs144146026	20	33508634	C	0.0016475	0.46227	0.00879849	0.4808	0.932267	1.04
E11 Non-insulin-dependent diabetes mellitus	rs6142154	20	32970673	T	-0.00032444	0.46468	0.302474	0.1871	0.998287	0.992
E11 Non-insulin-dependent diabetes mellitus	rs11167234	20	32983619	A	-0.00032378	0.46556	0.302494	0.183	0.997543	0.992
E11 Non-insulin-dependent diabetes mellitus	rs6142152	20	32960877	A	-0.00032163	0.46858	0.302481	0.201	0.998034	0.992
E11 Non-insulin-dependent diabetes mellitus	rs6142147	20	32953344	G	-0.00031545	0.47707	0.302506	0.1981	0.998523	0.993
E11 Non-insulin-dependent diabetes mellitus	rs2064705	20	33031276	C	0.00031015	0.48461	0.302527	0.1778	0.998048	1.01
E11 Non-insulin-dependent diabetes mellitus	rs55829662	20	33731625	C	0.00032121	0.48724	0.26254	0.5036	0.999375	1.01
E11 Non-insulin-dependent diabetes mellitus	rs7361656	20	33729147	G	0.00031546	0.49545	0.262433	0.4814	0.997747	1.01
E11 Non-insulin-dependent diabetes mellitus	rs6058150	20	33556817	T	0.00029313	0.49711	0.33446	0.5451	0.996537	1.01
E11 Non-insulin-dependent diabetes mellitus	rs6087613	20	33238981	A	-0.00042337	0.49877	0.123936	0.2307	0.974516	0.99
E11 Non-insulin-dependent diabetes mellitus	rs633784	20	33726323	G	-0.00030969	0.50348	0.262774	0.5428	0.996112	0.993
E11 Non-insulin-dependent diabetes mellitus	rs6060299	20	33780508	G	-0.00030064	0.50541	0.286877	0.7737	0.99185	0.993
E11 Non-insulin-dependent diabetes mellitus	rs4911474	20	33780297	G	-0.00029874	0.50809	0.286831	0.7514	0.992262	0.993
E11 Non-insulin-dependent diabetes mellitus	rs7260770	20	33552653	A	0.00028467	0.50965	0.334313	0.5656	0.996424	1.01
E11 Non-insulin-dependent diabetes mellitus	rs6088760	20	33773266	C	0.00029411	0.51336	0.287361	0.7359	0.998547	1.01
E11 Non-insulin-dependent diabetes mellitus	rs6060132	20	33556695	A	0.00028029	0.51611	0.334256	0.5866	0.996923	1.01
E11 Non-insulin-dependent diabetes mellitus	rs647515	20	33727050	G	-0.00029966	0.51761	0.262274	0.5337	0.996569	0.993
E11 Non-insulin-dependent diabetes mellitus	rs6060307	20	33792932	C	-0.00028909	0.52367	0.286567	0.8499	0.983151	0.993
E11 Non-insulin-dependent diabetes mellitus	rs3761142	20	33545816	T	0.00027424	0.52526	0.334435	0.5631	0.996282	1.01
E11 Non-insulin-dependent diabetes mellitus	rs2224320	20	33791590	C	-0.00028744	0.52563	0.286751	0.7953	0.985549	0.993
E11 Non-insulin-dependent diabetes mellitus	rs4911165	20	33550382	C	0.00027149	0.52916	0.335038	0.6325	0.996541	1.01
E11 Non-insulin-dependent diabetes mellitus	rs666210	20	33723810	C	-0.0002909	0.53015	0.262183	0.5164	0.995753	0.993
E11 Non-insulin-dependent diabetes mellitus	rs6060305	20	33788582	G	-0.00028102	0.5339	0.286969	0.7705	0.989909	0.993
E11 Non-insulin-dependent diabetes mellitus	rs6060304	20	33788350	T	-0.00027763	0.53876	0.286971	0.742	0.990623	0.993
E11 Non-insulin-dependent diabetes mellitus	rs6088658	20	33540489	C	0.00025872	0.54821	0.337402	0.4712	0.995746	1.01
E11 Non-insulin-dependent diabetes mellitus	rs2378261	20	33538384	T	0.0002586	0.54836	0.337448	0.4665	0.995834	1.01
E11 Non-insulin-dependent diabetes mellitus	rs2424993	20	33104592	C	0.00026629	0.54892	0.3019	0.02554	genotyped	1.01
E11 Non-insulin-dependent diabetes mellitus	rs4911429	20	33133553	A	-0.00026898	0.54897	0.307145	0.7618	0.963995	0.994
E11 Non-insulin-dependent diabetes mellitus	rs4911455	20	33553062	C	0.00025733	0.55008	0.337669	0.4976	0.997023	1.01
E11 Non-insulin-dependent diabetes mellitus	rs6060301	20	33783242	T	-0.00026933	0.55075	0.287338	0.7485	0.990915	0.994
E11 Non-insulin-dependent diabetes mellitus	rs73106997	20	33375138	T	0.00033356	0.55139	0.166712	0.04442	0.947745	1.01
E11 Non-insulin-dependent diabetes mellitus	rs2050652	20	33733180	G	-0.00027389	0.55433	0.2639	0.05367	genotyped	0.993
E11 Non-insulin-dependent diabetes mellitus	rs6060212	20	33676951	C	-0.00024516	0.55749	0.388017	0.4682	0.998348	0.994
E11 Non-insulin-dependent diabetes mellitus	rs6058149	20	33554488	G	0.00025253	0.55759	0.337406	0.5	0.997161	1.01
E11 Non-insulin-dependent diabetes mellitus	rs6060215	20	33677860	A	-0.00024491	0.55787	0.387987	0.453	0.998492	0.994
E11 Non-insulin-dependent diabetes mellitus	rs6060214	20	33677669	T	-0.00024461	0.55836	0.388003	0.4595	0.998436	0.994
E11 Non-insulin-dependent diabetes mellitus	rs6088704	20	33677621	C	-0.00024456	0.55843	0.388003	0.4616	0.998439	0.994
E11 Non-insulin-dependent diabetes mellitus	rs6060137	20	33565480	C	-0.00025686	0.56053	0.3084	0.08142	genotyped	0.994
E11 Non-insulin-dependent diabetes mellitus	rs6060127	20	33538999	C	0.00025	0.56181	0.337164	0.464	0.995958	1.01
E11 Non-insulin-dependent diabetes mellitus	rs13038162	20	33678071	T	-0.0002406	0.56525	0.389005	0.4704	0.995426	0.994
E11 Non-insulin-dependent diabetes mellitus	rs6142298	20	33688417	G	-0.00023891	0.56545	0.403272	0.6833	0.996253	0.994
E11 Non-insulin-dependent diabetes mellitus	rs6060216	20	33678078	C	-0.00023974	0.56663	0.388988	0.4704	0.995495	0.994
E11 Non-insulin-dependent diabetes mellitus	rs2425010	20	33581540	T	-0.00023898	0.56728	0.38802	0.5608	0.999297	0.994
E11 Non-insulin-dependent diabetes mellitus	rs6060128	20	33540587	T	0.00024637	0.56755	0.337135	0.4664	0.995831	1.01
E11 Non-insulin-dependent diabetes mellitus	rs17310328	20	33540565	C	0.00024628	0.5677	0.337137	0.4641	0.99584	1.01
E11 Non-insulin-dependent diabetes mellitus	rs1998231	20	33598419	T	-0.00023816	0.56852	0.388235	0.4361	0.999922	0.994
E11 Non-insulin-dependent diabetes mellitus	rs6060303	20	33785956	G	-0.00025694	0.56925	0.287433	0.7675	0.990949	0.994
E11 Non-insulin-dependent diabetes mellitus	rs6088665	20	33551218	G	0.00024487	0.56951	0.338008	0.46	0.996736	1.01
E11 Non-insulin-dependent diabetes mellitus	rs6088660	20	33542896	T	0.0002438	0.57152	0.337167	0.4712	0.996174	1.01
E11 Non-insulin-dependent diabetes mellitus	rs35024451	20	33542081	C	0.00024321	0.57247	0.337182	0.4735	0.996168	1.01
E11 Non-insulin-dependent diabetes mellitus	rs2425011	20	33581689	C	-0.00023445	0.57464	0.387949	0.5345	0.999401	0.994
E11 Non-insulin-dependent diabetes mellitus	rs112825656	20	32948518	A	-0.0002954	0.57533	0.193153	0.09288	0.952373	0.993
E11 Non-insulin-dependent diabetes mellitus	rs6088721	20	33706011	C	-0.00023197	0.57631	0.402847	0.6072	0.998457	0.994
E11 Non-insulin-dependent diabetes mellitus	rs2273805	20	33706575	A	-0.00023122	0.57754	0.40274	0.5826	0.998656	0.995
E11 Non-insulin-dependent diabetes mellitus	rs2065109	20	33707135	C	-0.000231	0.57789	0.402741	0.5826	0.998703	0.995
E11 Non-insulin-dependent diabetes mellitus	rs6120785	20	33580237	G	-0.00023133	0.57975	0.387939	0.5393	0.999441	0.995
E11 Non-insulin-dependent diabetes mellitus	rs2065108	20	33706822	T	-0.00022942	0.58049	0.40272	0.585	0.99876	0.995
E11 Non-insulin-dependent diabetes mellitus	rs6060217	20	33678134	G	-0.00024409	0.58104	0.305453	0.2473	0.997368	0.994
E11 Non-insulin-dependent diabetes mellitus	rs6060135	20	33563936	G	0.0002277	0.58155	0.416996	0.3959	0.997518	1.01
E11 Non-insulin-dependent diabetes mellitus	rs6060133	20	33558011	C	0.00023693	0.58197	0.338133	0.5003	0.997281	1.01
E11 Non-insulin-dependent diabetes mellitus	rs6579204	20	33553677	G	0.00023646	0.58277	0.338001	0.5372	0.996995	1.01
E11 Non-insulin-dependent diabetes mellitus	rs6088726	20	33713055	G	-0.00022768	0.58344	0.402398	0.5537	0.998802	0.995
E11 Non-insulin-dependent diabetes mellitus	rs7263251	20	33554320	C	0.00023559	0.58412	0.338133	0.5101	0.997109	1.01
E11 Non-insulin-dependent diabetes mellitus	rs2425013	20	33582731	T	-0.00022796	0.58531	0.388027	0.4973	0.999144	0.995
E11 Non-insulin-dependent diabetes mellitus	rs6142299	20	33704888	C	-0.00022653	0.58542	0.402794	0.5899	0.998158	0.995
E11 Non-insulin-dependent diabetes mellitus	rs2425014	20	33583114	C	-0.00024074	0.58605	0.304955	0.3131	0.999231	0.994
E11 Non-insulin-dependent diabetes mellitus	rs927442	20	33708871	G	-0.00022611	0.58606	0.40272	0.5802	0.998185	0.995
E11 Non-insulin-dependent diabetes mellitus	rs2016438	20	33708023	G	-0.00022568	0.58666	0.402705	0.5802	0.998823	0.995
E11 Non-insulin-dependent diabetes mellitus	rs6120827	20	33672123	T	-0.00024018	0.58697	0.304589	0.2605	0.99986	0.994
E11 Non-insulin-dependent diabetes mellitus	rs6142297	20	33687584	G	-0.00022541	0.58737	0.403306	0.6808	0.997299	0.995
E11 Non-insulin-dependent diabetes mellitus	rs17092195	20	33559251	C	0.00023334	0.58776	0.338057	0.4763	0.997183	1.01
E11 Non-insulin-dependent diabetes mellitus	rs6141535	20	33715067	A	-0.0002251	0.58786	0.403071	0.5949	0.997583	0.995
E11 Non-insulin-dependent diabetes mellitus	rs6579219	20	33711391	G	-0.00022454	0.5885	0.402684	0.6022	0.999139	0.995
E11 Non-insulin-dependent diabetes mellitus	rs1058003	20	33590417	A	-0.00022608	0.58861	0.387825	0.4445	0.99859	0.995
E11 Non-insulin-dependent diabetes mellitus	rs2152918	20	33740209	G	0.000249	0.58931	0.264911	0.5518	0.998484	1.01
E11 Non-insulin-dependent diabetes mellitus	rs6088723	20	33709279	C	-0.00022278	0.59145	0.402672	0.5899	0.998969	0.995
E11 Non-insulin-dependent diabetes mellitus	rs4911167	20	33590096	G	-0.00022385	0.5921	0.388153	0.4531	0.999194	0.995
E11 Non-insulin-dependent diabetes mellitus	rs6120838	20	33711624	A	-0.00022151	0.59351	0.402679	0.5973	0.999268	0.995
E11 Non-insulin-dependent diabetes mellitus	rs6088724	20	33712915	T	-0.00022134	0.5938	0.40267	0.5948	0.999298	0.995
E11 Non-insulin-dependent diabetes mellitus	rs6060175	20	33631936	A	-0.00022224	0.59474	0.388085	0.4467	0.999553	0.995
E11 Non-insulin-dependent diabetes mellitus	rs6087677	20	33714805	C	-0.00022086	0.59479	0.403014	0.6047	0.998278	0.995
E11 Non-insulin-dependent diabetes mellitus	rs17092378	20	33736188	T	0.00024496	0.59522	0.264952	0.5316	0.999088	1.01
E11 Non-insulin-dependent diabetes mellitus	rs6088728	20	33713674	C	-0.00022046	0.59526	0.402668	0.5948	0.999368	0.995
E11 Non-insulin-dependent diabetes mellitus	rs6087670	20	33662269	T	-0.00022127	0.59639	0.388128	0.4111	0.999293	0.995
E11 Non-insulin-dependent diabetes mellitus	rs4911169	20	33593834	A	-0.00022106	0.59664	0.388032	0.4297	0.999864	0.995
E11 Non-insulin-dependent diabetes mellitus	rs4911168	20	33593789	G	-0.0002208	0.59706	0.38805	0.4318	0.999897	0.995
E11 Non-insulin-dependent diabetes mellitus	rs2180847	20	33667763	T	-0.00022069	0.59737	0.388089	0.4131	0.999145	0.995
E11 Non-insulin-dependent diabetes mellitus	rs10875491	20	33614145	A	-0.00022052	0.59757	0.388043	0.4467	0.999568	0.995
E11 Non-insulin-dependent diabetes mellitus	rs6088725	20	33713040	A	-0.00021907	0.5977	0.402799	0.535	0.999271	0.995
E11 Non-insulin-dependent diabetes mellitus	rs6087657	20	33564689	A	0.00023244	0.59788	0.308068	0.2808	0.999952	1.01
E11 Non-insulin-dependent diabetes mellitus	rs6060164	20	33616314	G	-0.00021981	0.59873	0.388063	0.4531	0.99964	0.995
E11 Non-insulin-dependent diabetes mellitus	rs6088716	20	33700499	T	-0.00021842	0.59893	0.403316	0.6294	0.997875	0.995
E11 Non-insulin-dependent diabetes mellitus	rs6087660	20	33616528	C	-0.0002196	0.59909	0.388064	0.451	0.99964	0.995
E11 Non-insulin-dependent diabetes mellitus	rs6119559	20	33601601	G	-0.00023221	0.5992	0.305181	0.2891	0.999539	0.994
E11 Non-insulin-dependent diabetes mellitus	rs10875492	20	33631407	T	-0.00021946	0.59932	0.388066	0.4467	0.999756	0.995
E11 Non-insulin-dependent diabetes mellitus	rs3803938	20	33632600	T	-0.00021946	0.59932	0.388066	0.4467	0.999756	0.995
E11 Non-insulin-dependent diabetes mellitus	rs1358854	20	33633659	A	-0.00021946	0.59933	0.388066	0.4467	0.999756	0.995
E11 Non-insulin-dependent diabetes mellitus	rs1407203	20	33651979	T	-0.00021937	0.59966	0.388495	0.4214	0.998233	0.995
E11 Non-insulin-dependent diabetes mellitus	rs6058166	20	33656710	G	-0.00021921	0.59981	0.388112	0.407	0.999272	0.995
E11 Non-insulin-dependent diabetes mellitus	rs4911465	20	33670856	A	-0.00023188	0.59982	0.305179	0.2394	0.999522	0.994
E11 Non-insulin-dependent diabetes mellitus	rs6088687	20	33624750	A	-0.00021914	0.59985	0.388068	0.4488	0.999759	0.995
E11 Non-insulin-dependent diabetes mellitus	rs4911460	20	33624330	A	-0.0002191	0.59991	0.388069	0.4488	0.999762	0.995
E11 Non-insulin-dependent diabetes mellitus	rs6060170	20	33624466	G	-0.0002191	0.59991	0.388069	0.4488	0.999762	0.995
E11 Non-insulin-dependent diabetes mellitus	rs6060162	20	33611461	G	-0.00021904	0.60001	0.388067	0.4531	0.999743	0.995
E11 Non-insulin-dependent diabetes mellitus	rs752449	20	33592474	G	-0.00023178	0.60013	0.304665	0.278	0.999529	0.994
E11 Non-insulin-dependent diabetes mellitus	rs6060205	20	33658869	A	-0.00021855	0.60091	0.388115	0.409	0.999266	0.995
E11 Non-insulin-dependent diabetes mellitus	rs4911463	20	33642737	A	-0.00021822	0.60139	0.388056	0.4402	0.999715	0.995
E11 Non-insulin-dependent diabetes mellitus	rs6060167	20	33620611	A	-0.00021809	0.60159	0.388077	0.4531	0.999753	0.995
E11 Non-insulin-dependent diabetes mellitus	rs6088715	20	33700468	A	-0.00021677	0.60167	0.40333	0.6269	0.997953	0.995
E11 Non-insulin-dependent diabetes mellitus	rs4911462	20	33642732	T	-0.00021798	0.6018	0.388066	0.4402	0.999679	0.995
E11 Non-insulin-dependent diabetes mellitus	rs6087658	20	33606204	G	-0.00021797	0.6018	0.388082	0.4531	0.999736	0.995
E11 Non-insulin-dependent diabetes mellitus	rs6142283	20	33639206	T	-0.00021788	0.60195	0.388053	0.4402	0.999731	0.995
E11 Non-insulin-dependent diabetes mellitus	rs6088692	20	33638588	G	-0.00021785	0.60201	0.388053	0.4402	0.99973	0.995
E11 Non-insulin-dependent diabetes mellitus	rs1989395	20	33707989	T	-0.00021519	0.60411	0.403123	0.5658	0.999415	0.995
E11 Non-insulin-dependent diabetes mellitus	rs2281626	20	33637606	G	-0.00022865	0.60498	0.304739	0.2744	0.999919	0.995
E11 Non-insulin-dependent diabetes mellitus	rs6060193	20	33648433	T	-0.00022831	0.60543	0.305042	0.2642	0.999811	0.995
E11 Non-insulin-dependent diabetes mellitus	rs2180849	20	33648239	A	-0.00022828	0.60548	0.305042	0.2659	0.999817	0.995
E11 Non-insulin-dependent diabetes mellitus	rs6058192	20	33734261	G	0.00023811	0.60558	0.264904	0.546	0.999165	1.01
E11 Non-insulin-dependent diabetes mellitus	rs1885119	20	33645649	C	-0.00021552	0.60597	0.388036	0.4488	0.999357	0.995
E11 Non-insulin-dependent diabetes mellitus	rs6088693	20	33640342	G	-0.00022795	0.60608	0.304745	0.278	0.99993	0.995
E11 Non-insulin-dependent diabetes mellitus	rs4142034	20	33643256	G	-0.00022778	0.60625	0.305015	0.2676	0.999956	0.995
E11 Non-insulin-dependent diabetes mellitus	rs6060180	20	33638013	G	-0.00022776	0.60638	0.304749	0.278	0.999924	0.995
E11 Non-insulin-dependent diabetes mellitus	rs3746430	20	33593674	C	-0.0002277	0.60638	0.305019	0.2694	0.999912	0.995
E11 Non-insulin-dependent diabetes mellitus	rs6060173	20	33629082	T	-0.00022734	0.60694	0.305017	0.2746	0.999953	0.995
E11 Non-insulin-dependent diabetes mellitus	rs6120810	20	33626249	G	-0.00022688	0.60767	0.30502	0.2746	0.999957	0.995
E11 Non-insulin-dependent diabetes mellitus	rs6142301	20	33712148	C	-0.00021274	0.60815	0.403098	0.5778	0.999902	0.995
E11 Non-insulin-dependent diabetes mellitus	rs2065111	20	33708637	C	-0.00021273	0.60827	0.40305	0.5705	0.999275	0.995
E11 Non-insulin-dependent diabetes mellitus	rs6142302	20	33713251	G	-0.00021233	0.60884	0.403102	0.5754	0.999922	0.995
E11 Non-insulin-dependent diabetes mellitus	rs1998232	20	33601959	G	-0.00022588	0.60926	0.305015	0.2711	0.999944	0.995
E11 Non-insulin-dependent diabetes mellitus	rs2295887	20	33714187	A	-0.00021203	0.60935	0.403111	0.5851	0.999858	0.995
E11 Non-insulin-dependent diabetes mellitus	rs2378333	20	33708890	G	-0.00021212	0.6094	0.403104	0.5681	0.998642	0.995
E11 Non-insulin-dependent diabetes mellitus	rs2180848	20	33619111	G	-0.00022558	0.60973	0.305031	0.2764	0.999889	0.995
E11 Non-insulin-dependent diabetes mellitus	rs6060154	20	33599601	C	-0.00022556	0.60977	0.305029	0.2694	0.999883	0.995
E11 Non-insulin-dependent diabetes mellitus	rs6060196	20	33653617	G	-0.00022508	0.61055	0.305096	0.2442	0.999697	0.995
E11 Non-insulin-dependent diabetes mellitus	rs2180850	20	33655308	C	-0.00022459	0.61133	0.305072	0.2425	0.999757	0.995
E11 Non-insulin-dependent diabetes mellitus	rs6060201	20	33655813	G	-0.0002245	0.61147	0.305074	0.2409	0.999759	0.995
E11 Non-insulin-dependent diabetes mellitus	rs6120816	20	33644358	C	-0.00021174	0.61223	0.388047	0.4402	0.99972	0.995
E11 Non-insulin-dependent diabetes mellitus	rs4911464	20	33659122	A	-0.00022371	0.61272	0.305076	0.2474	0.999769	0.995
E11 Non-insulin-dependent diabetes mellitus	rs1885118	20	33567860	C	-0.00021092	0.61316	0.391009	0.4458	0.999432	0.995
E11 Non-insulin-dependent diabetes mellitus	rs2425007	20	33572941	G	-0.00022268	0.6134	0.30812	0.2844	0.999438	0.995
E11 Non-insulin-dependent diabetes mellitus	rs112310554	20	32895324	G	-0.00028091	0.61341	0.173057	0.1555	0.934132	0.993
E11 Non-insulin-dependent diabetes mellitus	rs6058179	20	33689328	G	-0.00022087	0.61343	0.31889	0.2855	0.997507	0.995
E11 Non-insulin-dependent diabetes mellitus	rs6088677	20	33607464	T	-0.00022302	0.61388	0.304751	0.2888	0.999805	0.995
E11 Non-insulin-dependent diabetes mellitus	rs6142272	20	33613371	G	-0.00022212	0.6153	0.304762	0.287	0.999798	0.995
E11 Non-insulin-dependent diabetes mellitus	rs6088659	20	33542605	C	-0.00027583	0.61665	0.171523	0.1214	0.957711	0.993
E11 Non-insulin-dependent diabetes mellitus	rs6058165	20	33640840	T	-0.00022064	0.61765	0.305171	0.259	0.999344	0.995
E11 Non-insulin-dependent diabetes mellitus	rs6119558	20	33574493	C	-0.00020714	0.61948	0.391161	0.448	0.999558	0.995
E11 Non-insulin-dependent diabetes mellitus	rs2425008	20	33574022	C	-0.00020532	0.62256	0.391195	0.4566	0.999254	0.995
E11 Non-insulin-dependent diabetes mellitus	rs4911166	20	33573377	A	-0.00020475	0.62374	0.390512	0.4627	0.998546	0.995
E11 Non-insulin-dependent diabetes mellitus	rs6060250	20	33704108	C	-0.00020839	0.63365	0.318787	0.2853	0.997587	0.995
E11 Non-insulin-dependent diabetes mellitus	rs6060243	20	33698119	C	-0.00020734	0.63549	0.31898	0.2957	0.996362	0.995
E11 Non-insulin-dependent diabetes mellitus	rs6060156	20	33610145	G	-0.00020908	0.63612	0.305145	0.2873	0.999636	0.995
E11 Non-insulin-dependent diabetes mellitus	rs6088524	20	33139384	C	-0.00020339	0.63838	0.334521	0.3957	0.992866	0.995
E11 Non-insulin-dependent diabetes mellitus	rs6142300	20	33705708	C	-0.00020508	0.63883	0.318769	0.2753	0.99897	0.995
E11 Non-insulin-dependent diabetes mellitus	rs6060151	20	33594226	T	-0.00019626	0.63941	0.3881	0.0148	genotyped	0.995
E11 Non-insulin-dependent diabetes mellitus	rs6088722	20	33706187	C	-0.00020466	0.6395	0.318765	0.2719	0.999103	0.995
E11 Non-insulin-dependent diabetes mellitus	rs6142216	20	33256036	A	-0.00019646	0.64114	0.371242	0.6089	0.998678	0.995
E11 Non-insulin-dependent diabetes mellitus	rs4911456	20	33573500	A	-0.00020521	0.64152	0.308205	0.299	0.998642	0.995
E11 Non-insulin-dependent diabetes mellitus	rs6088523	20	33135550	G	-0.00020119	0.64301	0.331973	0.5046	0.990274	0.995
E11 Non-insulin-dependent diabetes mellitus	rs6087663	20	33625526	G	-0.00020544	0.64468	0.3048	0.001121	genotyped	0.995
E11 Non-insulin-dependent diabetes mellitus	rs1040747	20	33145832	G	-0.00019917	0.64525	0.334606	0.4131	0.993414	0.995
E11 Non-insulin-dependent diabetes mellitus	rs1885115	20	33681256	A	-0.00020028	0.64672	0.31899	0.3152	0.998066	0.995
E11 Non-insulin-dependent diabetes mellitus	rs2295885	20	33713963	C	-0.00019941	0.64825	0.318493	0.284	0.998869	0.995
E11 Non-insulin-dependent diabetes mellitus	rs6058186	20	33701835	G	-0.00019919	0.64861	0.318858	0.2997	0.997994	0.995
E11 Non-insulin-dependent diabetes mellitus	rs6058184	20	33701483	C	-0.00019842	0.64987	0.318861	0.2979	0.997996	0.995
E11 Non-insulin-dependent diabetes mellitus	rs2295886	20	33713975	C	-0.00019835	0.65143	0.3195	0.0002578	genotyped	0.995
E11 Non-insulin-dependent diabetes mellitus	rs6141504	20	33281651	G	-0.00018885	0.65546	0.366864	0.953	0.994291	0.996
E11 Non-insulin-dependent diabetes mellitus	rs6088727	20	33713639	A	-0.00018511	0.65638	0.4044	0.03792	genotyped	0.996
E11 Non-insulin-dependent diabetes mellitus	rs2889874	20	33715777	T	-0.00018094	0.66126	0.454041	0.6201	0.978144	0.996
E11 Non-insulin-dependent diabetes mellitus	rs6088578	20	33281604	T	-0.00018542	0.66132	0.366866	0.956	0.994297	0.996
E11 Non-insulin-dependent diabetes mellitus	rs6087598	20	33140934	A	-0.0001891	0.66286	0.332147	0.4972	0.991722	0.996
E11 Non-insulin-dependent diabetes mellitus	rs6142222	20	33281736	T	-0.00018355	0.66454	0.366783	0.9501	0.994436	0.996
E11 Non-insulin-dependent diabetes mellitus	rs6088565	20	33254986	C	-0.00018207	0.66581	0.370956	0.566	0.999149	0.996
E11 Non-insulin-dependent diabetes mellitus	rs6579218	20	33709846	C	-0.0001871	0.67339	0.300862	0.198	0.998788	0.996
E11 Non-insulin-dependent diabetes mellitus	rs6579167	20	33032915	C	0.00020822	0.67592	0.217125	0.1025	0.984017	1
E11 Non-insulin-dependent diabetes mellitus	rs6088525	20	33141272	C	-0.00017986	0.6784	0.332949	0.5247	0.990377	0.996
E11 Non-insulin-dependent diabetes mellitus	rs2180485	20	33278442	C	-0.00017379	0.68131	0.367106	0.8915	0.994252	0.996
E11 Non-insulin-dependent diabetes mellitus	rs13042351	20	33238573	A	-0.00017303	0.68133	0.371265	0.5936	0.999411	0.996
E11 Non-insulin-dependent diabetes mellitus	rs7274854	20	33228672	A	-0.00017254	0.68219	0.371258	0.5911	0.999329	0.996
E11 Non-insulin-dependent diabetes mellitus	rs4911158	20	33239512	T	0.00017233	0.6831	0.3717	0.1445	genotyped	1
E11 Non-insulin-dependent diabetes mellitus	rs6058106	20	33278255	C	-0.00017208	0.68429	0.367105	0.8973	0.994064	0.996
E11 Non-insulin-dependent diabetes mellitus	rs1853056	20	33262058	T	-0.00016676	0.69261	0.370186	0.5656	0.998401	0.996
E11 Non-insulin-dependent diabetes mellitus	rs6059987	20	33277731	A	-0.00016385	0.69872	0.366745	0.8915	0.994106	0.996
E11 Non-insulin-dependent diabetes mellitus	rs6060163	20	33611738	C	-0.00016888	0.70311	0.302138	0.2122	0.99948	0.996
E11 Non-insulin-dependent diabetes mellitus	rs6060159	20	33610546	G	-0.00016886	0.70315	0.302142	0.2122	0.999419	0.996
E11 Non-insulin-dependent diabetes mellitus	rs6060194	20	33649930	C	-0.00016837	0.70399	0.302236	0.1992	0.999277	0.996
E11 Non-insulin-dependent diabetes mellitus	rs6088570	20	33268295	C	-0.00015927	0.7059	0.370041	0.5931	0.997239	0.996
E11 Non-insulin-dependent diabetes mellitus	rs6087614	20	33262874	C	-0.00015163	0.71936	0.36957	0.5531	0.998515	0.996
E11 Non-insulin-dependent diabetes mellitus	rs4911437	20	33266149	T	-0.00014997	0.72235	0.369524	0.5482	0.998199	0.996
E11 Non-insulin-dependent diabetes mellitus	rs6088575	20	33273403	G	-0.00014379	0.73357	0.369754	0.5803	0.995214	0.997
E11 Non-insulin-dependent diabetes mellitus	rs6141482	20	33156523	C	-0.0001431	0.74064	0.335141	0.3656	0.99481	0.997
E11 Non-insulin-dependent diabetes mellitus	rs6141486	20	33178132	A	-0.00014103	0.74413	0.335557	0.3865	0.994682	0.997
E11 Non-insulin-dependent diabetes mellitus	rs6088529	20	33170752	A	-0.00013358	0.75731	0.335122	0.3556	0.994958	0.997
E11 Non-insulin-dependent diabetes mellitus	rs6088520	20	33132364	C	-0.00011435	0.77955	0.4733	0.05245	genotyped	0.997
E11 Non-insulin-dependent diabetes mellitus	rs6088547	20	33212947	A	-0.00010592	0.80578	0.337024	0.4337	0.998357	0.997
E11 Non-insulin-dependent diabetes mellitus	rs8116198	20	33114201	A	-0.00014424	0.80704	0.1387	0.09649	genotyped	0.997
E11 Non-insulin-dependent diabetes mellitus	rs6088542	20	33204410	T	-0.00010318	0.81072	0.337084	0.436	0.998624	0.998
E11 Non-insulin-dependent diabetes mellitus	rs6579178	20	33203552	A	-0.00010221	0.81247	0.337076	0.436	0.99827	0.998
E11 Non-insulin-dependent diabetes mellitus	rs6088543	20	33206191	T	-0.00010208	0.81271	0.337149	0.436	0.998476	0.998
E11 Non-insulin-dependent diabetes mellitus	rs6087609	20	33214541	C	-0.00010161	0.81354	0.337112	0.4315	0.998782	0.998
E11 Non-insulin-dependent diabetes mellitus	rs6088548	20	33215745	C	-0.0001013	0.8141	0.337108	0.4382	0.99865	0.998
E11 Non-insulin-dependent diabetes mellitus	rs1033798	20	33719945	C	0.00035988	0.8168	0.0177767	0.1824	0.983745	1.01
E11 Non-insulin-dependent diabetes mellitus	rs34502964	20	33218638	A	0.0001141	0.81808	0.219112	0.1682	0.985183	1
E11 Non-insulin-dependent diabetes mellitus	rs6141493	20	33218649	G	-9.4093e-05	0.82711	0.336962	0.427	0.998513	0.998
E11 Non-insulin-dependent diabetes mellitus	rs17092385	20	33739254	A	-0.00014051	0.82999	0.1138	0.09597	0.958066	0.997
E11 Non-insulin-dependent diabetes mellitus	rs11904852	20	33216764	A	-9.0926e-05	0.83289	0.336671	0.4679	0.998417	0.998
E11 Non-insulin-dependent diabetes mellitus	rs6087571	20	32912091	G	0.00012683	0.83301	0.136428	0.2923	0.972198	1
E11 Non-insulin-dependent diabetes mellitus	rs6087606	20	33194426	C	-8.7321e-05	0.83924	0.338843	0.3626	0.997924	0.998
E11 Non-insulin-dependent diabetes mellitus	rs1415772	20	33765583	G	-9.3297e-05	0.83954	0.267443	0.7377	0.995021	0.998
E11 Non-insulin-dependent diabetes mellitus	rs721613	20	33193428	G	-8.6318e-05	0.84107	0.33877	0.3566	0.997702	0.998
E11 Non-insulin-dependent diabetes mellitus	rs6142208	20	33220263	T	-8.2382e-05	0.84836	0.336426	0.4424	0.999849	0.998
E11 Non-insulin-dependent diabetes mellitus	rs7264012	20	33191027	C	-8.0716e-05	0.85127	0.338674	0.3747	0.99775	0.998
E11 Non-insulin-dependent diabetes mellitus	rs632688	20	33778287	C	7.1562e-05	0.87658	0.267398	0.8277	0.994685	1
E11 Non-insulin-dependent diabetes mellitus	rs6088532	20	33178782	G	-6.4913e-05	0.88033	0.338444	0.36	0.994994	0.998
E11 Non-insulin-dependent diabetes mellitus	rs6142209	20	33220984	T	6.3163e-05	0.88386	0.3366	0.07358	genotyped	1
E11 Non-insulin-dependent diabetes mellitus	rs17092209	20	33592721	A	-7.9864e-05	0.89717	0.1242	0.1509	genotyped	0.998
E11 Non-insulin-dependent diabetes mellitus	rs6060124	20	33536897	A	-5.5714e-05	0.89957	0.309663	0.2409	0.992465	0.999
E11 Non-insulin-dependent diabetes mellitus	rs6088619	20	33411871	G	-6.0723e-05	0.91895	0.136756	0.4192	0.985849	0.999
E11 Non-insulin-dependent diabetes mellitus	rs6088519	20	33132191	C	3.4741e-05	0.93945	0.2792	1.056e-11	genotyped	1
E11 Non-insulin-dependent diabetes mellitus	rs1015363	20	32738335	A	-2.2219e-05	0.95671	0.465308	0.2703	0.993051	0.999

## Sheet: T2D-GSS
Trait	Variant	Chromosome	Position	Eff. allele	beta	pv	MAF	HWE	imp. score	ORbeta*
type 2 diabetes	rs78116891	20	32655691	C	-0.00074939	0.02864	0.06259	0.3954	genotyped	0.889
type 2 diabetes	rs113604906	20	32599334	G	-0.00071612	0.091688	0.03966	0.392	genotyped	0.893
type 2 diabetes	rs75261307	20	32567143	T	0.00072279	0.093828	0.0392919	0.3632	0.973425	1.12
type 2 diabetes	rs112712641	20	32599316	T	0.00069056	0.10074	0.0403054	0.3636	0.998868	1.11
type 2 diabetes	rs55695988	20	33090447	A	-0.00042169	0.11219	0.109646	0.1858	0.995094	0.936
type 2 diabetes	rs17305573	20	33180152	C	-0.00042735	0.11352	0.105156	0.6838	0.995932	0.935
type 2 diabetes	rs56020497	20	33166470	T	-0.00042079	0.11917	0.104753	0.7172	0.999679	0.936
type 2 diabetes	rs10048849	20	33419680	T	0.00026454	0.12052	0.384887	0.7892	0.995916	1.04
type 2 diabetes	rs1885120	20	33576989	G	0.00042157	0.13001	0.0994682	0.8121	0.983635	1.07
type 2 diabetes	rs62212235	20	33082171	T	-0.0003945	0.13505	0.11016	0.8219	1	0.94
type 2 diabetes	rs4621232	20	33662737	T	0.0004073	0.13849	0.10199	0.8677	0.986792	1.07
type 2 diabetes	rs73106997	20	33375138	T	0.00032757	0.15052	0.166712	0.04442	0.947745	1.05
type 2 diabetes	rs6088659	20	33542605	C	-0.0003181	0.15593	0.171523	0.1214	0.957711	0.951
type 2 diabetes	rs1033798	20	33719945	C	0.00089019	0.15904	0.0177767	0.1824	0.983745	1.15
type 2 diabetes	rs6142206	20	33212055	G	-0.00023442	0.16299	0.4219	0.06926	genotyped	0.964
type 2 diabetes	rs12626122	20	33425800	G	0.00023848	0.16413	0.374328	0.838	0.994259	1.04
type 2 diabetes	rs6088617	20	33408036	A	0.00023556	0.16598	0.386823	0.8998	0.998065	1.04
type 2 diabetes	rs4911466	20	33690010	T	0.00038704	0.16728	0.0988132	0.8934	0.976478	1.06
type 2 diabetes	rs11698977	20	33449691	T	0.00023541	0.16736	0.381834	0.9394	0.997502	1.04
type 2 diabetes	rs6120724	20	33366470	T	0.00023113	0.17473	0.386202	0.9026	0.995593	1.04
type 2 diabetes	rs28542147	20	33376323	A	0.00022604	0.18363	0.386971	0.8827	0.99831	1.04
type 2 diabetes	rs13041059	20	33366641	G	0.0002255	0.18469	0.386974	0.8855	0.998283	1.04
type 2 diabetes	rs6119522	20	33366481	A	0.00022523	0.18525	0.387045	0.8827	0.998036	1.04
type 2 diabetes	rs6120727	20	33374102	C	0.00022517	0.18534	0.38697	0.8941	0.998299	1.04
type 2 diabetes	rs6120723	20	33364655	T	0.00022479	0.18608	0.386979	0.8798	0.998302	1.04
type 2 diabetes	rs6087639	20	33443866	A	0.00022121	0.19414	0.382081	0.8566	0.998738	1.04
type 2 diabetes	rs6087626	20	33347328	T	0.00022034	0.1949	0.387214	0.9112	0.998082	1.04
type 2 diabetes	rs2180276	20	33360785	A	0.00022015	0.19542	0.387065	0.9083	0.997766	1.04
type 2 diabetes	rs6119516	20	33328024	T	0.000219	0.19755	0.387586	0.8488	0.998077	1.04
type 2 diabetes	rs6120705	20	33313740	C	0.00021797	0.19971	0.387446	0.86	0.998003	1.03
type 2 diabetes	rs6088590	20	33313566	C	0.00021738	0.20092	0.387476	0.8544	0.997764	1.03
type 2 diabetes	rs17092385	20	33739254	A	0.00034009	0.2015	0.1138	0.09597	0.958066	1.06
type 2 diabetes	rs62211619	20	33410931	A	-0.00034601	0.20526	0.103736	0.8055	0.985022	0.947
type 2 diabetes	rs6058107	20	33288546	C	0.00024811	0.20625	0.232474	0.8215	0.995375	1.04
type 2 diabetes	rs2425001	20	33394868	T	0.00020881	0.21221	0.428442	0.925	0.997338	1.03
type 2 diabetes	rs2425000	20	33391141	C	0.00020854	0.21287	0.428354	0.9139	0.996865	1.03
type 2 diabetes	rs62211621	20	33411661	C	-0.00033889	0.21513	0.10356	0.841	0.984754	0.948
type 2 diabetes	rs6060057	20	33392283	G	0.00020748	0.21515	0.428364	0.9222	0.997459	1.03
type 2 diabetes	rs6119512	20	33306904	C	0.00021007	0.21657	0.387235	0.8685	0.997844	1.03
type 2 diabetes	rs6119534	20	33441257	T	0.00021003	0.2185	0.379067	0.6876	0.997563	1.03
type 2 diabetes	rs2424997	20	33384805	G	0.00020273	0.22537	0.430323	0.7329	0.998384	1.03
type 2 diabetes	rs4911445	20	33378752	C	-0.00020204	0.22694	0.430336	0.725	0.998359	0.969
type 2 diabetes	rs4911444	20	33378448	G	-0.00020131	0.22862	0.430329	0.7302	0.99832	0.969
type 2 diabetes	rs6060052	20	33382665	G	0.0002011	0.22915	0.430185	0.725	0.998331	1.03
type 2 diabetes	rs11167245	20	33371537	C	-0.00019761	0.23732	0.430125	0.7752	0.998457	0.969
type 2 diabetes	rs1986110	20	33319036	T	-0.00019735	0.23801	0.429798	0.7938	0.998085	0.969
type 2 diabetes	rs6141514	20	33377565	T	-0.00019693	0.23891	0.430113	0.7672	0.998519	0.969
type 2 diabetes	rs6060038	20	33357715	A	-0.00019567	0.24195	0.430052	0.7832	0.998467	0.97
type 2 diabetes	rs6060048	20	33370266	C	-0.0001954	0.2426	0.430054	0.7966	0.998411	0.97
type 2 diabetes	rs17092066	20	33322840	C	-0.00019528	0.24297	0.429715	0.8398	0.997831	0.97
type 2 diabetes	rs2378259	20	33341688	A	-0.00019471	0.24432	0.429638	0.829	0.997934	0.97
type 2 diabetes	rs6087624	20	33336085	G	-0.0001945	0.24486	0.429653	0.8263	0.997891	0.97
type 2 diabetes	rs62213657	20	33341129	T	-0.00019442	0.24508	0.429544	0.8235	0.998072	0.97
type 2 diabetes	rs6060012	20	33305220	T	-0.00019419	0.24563	0.429646	0.8426	0.997743	0.97
type 2 diabetes	rs4911441	20	33316546	C	-0.00019368	0.24686	0.429619	0.8344	0.998051	0.97
type 2 diabetes	rs6141509	20	33319388	A	-0.00019321	0.24801	0.429608	0.8398	0.99815	0.97
type 2 diabetes	rs6060013	20	33308809	G	-0.00019317	0.24812	0.429599	0.8371	0.998031	0.97
type 2 diabetes	rs6060015	20	33310057	T	-0.00019244	0.24991	0.429577	0.8371	0.998033	0.97
type 2 diabetes	rs6060039	20	33357945	T	-0.0001915	0.25214	0.429844	0.7965	0.998375	0.97
type 2 diabetes	rs1018503	20	33325516	G	-0.00019097	0.25357	0.429769	0.81	0.997936	0.97
type 2 diabetes	rs3787219	20	33355261	T	-0.00019071	0.25417	0.429652	0.8127	0.997977	0.97
type 2 diabetes	rs11698996	20	33449739	G	0.00019442	0.25651	0.372532	0.9913	0.996902	1.03
type 2 diabetes	rs67159833	20	33488079	C	0.00018961	0.2699	0.367528	0.8286	0.99643	1.03
type 2 diabetes	rs34502964	20	33218638	A	0.00022195	0.2715	0.219112	0.1682	0.985183	1.04
type 2 diabetes	rs17092209	20	33592721	A	-0.00026395	0.29382	0.1242	0.1509	genotyped	0.959
type 2 diabetes	rs112310554	20	32895324	G	0.00023646	0.29594	0.173057	0.1555	0.934132	1.04
type 2 diabetes	rs17122844	20	33452600	T	-0.00019728	0.30926	0.240034	0.929	0.996427	0.969
type 2 diabetes	rs62212082	20	33454241	A	-0.000193	0.31977	0.240111	0.9254	0.996729	0.97
type 2 diabetes	rs61655108	20	33455008	A	-0.00019138	0.3241	0.239675	0.9365	0.997352	0.97
type 2 diabetes	rs62212084	20	33458851	G	-0.00018899	0.32983	0.240047	0.9515	0.997557	0.971
type 2 diabetes	rs59030726	20	33454117	A	-0.00018755	0.33383	0.239745	0.9551	0.997296	0.971
type 2 diabetes	rs7273470	20	33456921	C	-0.000186	0.33784	0.239698	0.9664	0.99747	0.971
type 2 diabetes	rs7265109	20	33459354	A	-0.00018399	0.343	0.239682	0.9776	0.997858	0.971
type 2 diabetes	rs11697978	20	33460366	C	-0.00018324	0.34494	0.239673	0.9701	0.998018	0.972
type 2 diabetes	rs2295096	20	33464710	G	-0.00018194	0.34831	0.239677	0.9589	0.998254	0.972
type 2 diabetes	rs6088521	20	33133184	C	0.0001473	0.38151	0.476982	0.3137	0.969652	1.02
type 2 diabetes	rs6088619	20	33411871	G	-0.00020645	0.39517	0.136756	0.4192	0.985849	0.968
type 2 diabetes	rs4911429	20	33133553	A	-0.00014365	0.43153	0.307145	0.7618	0.963995	0.978
type 2 diabetes	rs12624640	20	32952125	A	0.00012488	0.45643	0.428495	0.3328	0.996149	1.02
type 2 diabetes	rs6088519	20	33132191	C	-0.00013247	0.47659	0.2792	1.056e-11	genotyped	0.979
type 2 diabetes	rs45465702	20	33320571	T	-0.00015258	0.47747	0.1825	0.08978	genotyped	0.976
type 2 diabetes	rs6142329	20	33795623	G	0.00011732	0.48585	0.439235	0.8995	0.979456	1.02
type 2 diabetes	rs6088638	20	33470514	C	0.00015259	0.48671	0.17391	0.0972	0.992771	1.02
type 2 diabetes	rs6058146	20	33540529	G	0.00011132	0.51233	0.391987	0.6361	0.995594	1.02
type 2 diabetes	rs4911163	20	33470694	T	0.00011288	0.51307	0.3787	0.07442	genotyped	1.02
type 2 diabetes	rs2065003	20	33538521	G	0.00011109	0.51324	0.391959	0.6335	0.995552	1.02
type 2 diabetes	rs144146026	20	33508634	C	0.00056482	0.53566	0.00879849	0.4808	0.932267	1.09
type 2 diabetes	rs1124511	20	33736697	C	-0.0001018	0.53955	0.475183	0.1854	0.998852	0.984
type 2 diabetes	rs945959	20	33734905	C	-0.00010092	0.54297	0.475201	0.1787	0.999205	0.984
type 2 diabetes	rs6060267	20	33734012	G	-0.0001009	0.54303	0.475206	0.1821	0.99931	0.984
type 2 diabetes	rs6088730	20	33733704	G	-0.00010078	0.5435	0.475202	0.1821	0.999341	0.984
type 2 diabetes	rs6060268	20	33734293	C	-0.00010063	0.54414	0.475147	0.1866	0.999144	0.984
type 2 diabetes	rs1415771	20	33734493	A	-0.00010063	0.54418	0.475146	0.1866	0.999111	0.984
type 2 diabetes	rs12481169	20	33794510	C	0.00010086	0.54874	0.438594	0.8885	0.981619	1.02
type 2 diabetes	rs6087654	20	33522142	C	0.00010216	0.54974	0.378549	0.8107	0.998379	1.02
type 2 diabetes	rs6087653	20	33522054	C	0.00010197	0.55044	0.378719	0.7995	0.998433	1.02
type 2 diabetes	rs6087652	20	33520802	A	0.00010191	0.55067	0.378731	0.8023	0.998415	1.02
type 2 diabetes	rs6119545	20	33522869	C	0.00010163	0.55177	0.378712	0.8107	0.998439	1.02
type 2 diabetes	rs4911452	20	33526983	C	0.00010093	0.5542	0.379959	0.6611	0.998898	1.02
type 2 diabetes	rs6120757	20	33488771	T	0.0001007	0.55526	0.377904	0.8703	0.999452	1.02
type 2 diabetes	rs6058149	20	33554488	G	0.00010284	0.55726	0.337406	0.5	0.997161	1.02
type 2 diabetes	rs6060107	20	33475601	C	9.9565e-05	0.55978	0.377679	0.8588	0.999706	1.02
type 2 diabetes	rs2273683	20	33509523	T	9.914e-05	0.56148	0.37764	0.8788	0.999598	1.02
type 2 diabetes	rs2064454	20	33496169	T	9.9087e-05	0.56169	0.377642	0.8788	0.9996	1.02
type 2 diabetes	rs2180568	20	33794794	G	9.7536e-05	0.56208	0.438102	0.933	0.98127	1.02
type 2 diabetes	rs6060112	20	33489276	T	9.8953e-05	0.56219	0.377645	0.8759	0.999736	1.02
type 2 diabetes	rs3787214	20	33500245	A	9.876e-05	0.56297	0.378738	0.8904	0.998643	1.02
type 2 diabetes	rs734111	20	33533736	C	9.8878e-05	0.56303	0.379271	0.7001	0.995412	1.02
type 2 diabetes	rs6087642	20	33468306	C	9.8577e-05	0.56359	0.378317	0.8703	0.99963	1.02
type 2 diabetes	rs6088653	20	33520321	C	9.8574e-05	0.56363	0.378435	0.876	0.999326	1.02
type 2 diabetes	rs3746450	20	33508588	T	9.8374e-05	0.56444	0.378471	0.8789	0.99924	1.02
type 2 diabetes	rs2378293	20	33499052	G	9.8359e-05	0.56455	0.378723	0.8904	0.998705	1.02
type 2 diabetes	rs1060615	20	33478381	G	9.8232e-05	0.56491	0.378364	0.8817	0.999774	1.02
type 2 diabetes	rs6088636	20	33469746	T	9.8202e-05	0.56504	0.378366	0.8617	0.999805	1.02
type 2 diabetes	rs4911449	20	33512236	G	9.8205e-05	0.56508	0.378429	0.8789	0.999406	1.02
type 2 diabetes	rs2378294	20	33500378	A	9.8204e-05	0.56514	0.378896	0.8875	0.998681	1.02
type 2 diabetes	rs6120763	20	33506400	G	9.8188e-05	0.56519	0.378386	0.8817	0.999248	1.02
type 2 diabetes	rs4911447	20	33479445	A	9.8139e-05	0.56527	0.378356	0.8903	0.999809	1.02
type 2 diabetes	rs1013677	20	33468793	A	9.814e-05	0.56528	0.378371	0.8617	0.999802	1.02
type 2 diabetes	rs6088642	20	33483186	T	9.8116e-05	0.56536	0.378353	0.8875	0.999858	1.02
type 2 diabetes	rs6087641	20	33467717	C	9.8091e-05	0.56549	0.378483	0.8674	0.999665	1.02
type 2 diabetes	rs6087651	20	33518353	T	9.809e-05	0.56551	0.378609	0.8732	0.999422	1.02
type 2 diabetes	rs6120754	20	33482189	A	9.8063e-05	0.56557	0.37835	0.8875	0.999868	1.02
type 2 diabetes	rs6087649	20	33510662	G	9.8024e-05	0.56585	0.378508	0.8789	0.999095	1.02
type 2 diabetes	rs6088646	20	33505937	C	9.7962e-05	0.56605	0.378416	0.876	0.999352	1.02
type 2 diabetes	rs6088655	20	33527838	G	9.7954e-05	0.56613	0.3801	0.4445	genotyped	1.02
type 2 diabetes	rs6088640	20	33472509	T	9.7774e-05	0.56669	0.378538	0.8646	0.999904	1.02
type 2 diabetes	rs6119543	20	33484757	T	9.775e-05	0.56678	0.378528	0.8818	0.999917	1.02
type 2 diabetes	rs3818273	20	33509275	A	9.772e-05	0.56697	0.378594	0.8732	0.999479	1.02
type 2 diabetes	rs4911451	20	33512466	G	9.7707e-05	0.56702	0.378594	0.8732	0.999458	1.02
type 2 diabetes	rs7266550	20	33495510	T	9.7696e-05	0.56707	0.378593	0.876	0.999481	1.02
type 2 diabetes	rs6087643	20	33474462	T	9.7635e-05	0.56724	0.378535	0.8646	0.999856	1.02
type 2 diabetes	rs2207147	20	33488013	A	9.762e-05	0.56731	0.378496	0.8818	0.99988	1.02
type 2 diabetes	rs6119542	20	33484545	T	9.7599e-05	0.56738	0.378517	0.8789	0.999918	1.02
type 2 diabetes	rs6088650	20	33514465	C	9.7616e-05	0.56739	0.378586	0.8703	0.999421	1.02
type 2 diabetes	rs6120756	20	33486596	A	9.7562e-05	0.56752	0.378515	0.8818	0.999954	1.02
type 2 diabetes	rs725521	20	33516071	C	9.7557e-05	0.56762	0.378583	0.8703	0.999427	1.02
type 2 diabetes	rs926734	20	33491700	T	9.7198e-05	0.56919	0.379647	0.974	0.997537	1.02
type 2 diabetes	rs6088734	20	33745046	T	-9.497e-05	0.56974	0.43727	0.405	0.99818	0.985
type 2 diabetes	rs2076667	20	33506964	A	9.6942e-05	0.57011	0.378686	0.8732	0.999127	1.02
type 2 diabetes	rs6058198	20	33748253	A	-9.3787e-05	0.57463	0.437239	0.3743	0.997865	0.985
type 2 diabetes	rs6142327	20	33793147	A	9.3784e-05	0.57699	0.438379	0.7823	0.982642	1.01
type 2 diabetes	rs112825656	20	32948518	A	0.00011836	0.58116	0.193153	0.09288	0.952373	1.02
type 2 diabetes	rs8122889	20	33424151	G	9.3833e-05	0.58201	0.384905	0.7753	0.995263	1.01
type 2 diabetes	rs6088623	20	33429684	C	9.3772e-05	0.58225	0.384805	0.7644	0.995296	1.01
type 2 diabetes	rs6579204	20	33553677	G	9.6237e-05	0.58268	0.338001	0.5372	0.996995	1.02
type 2 diabetes	rs73610830	20	32863523	G	9.8013e-05	0.58314	0.320551	0.4441	0.987163	1.02
type 2 diabetes	rs3746438	20	33584289	C	-9.1669e-05	0.58359	0.4404	0.02813	genotyped	0.986
type 2 diabetes	rs4911455	20	33553062	C	9.4862e-05	0.5882	0.337669	0.4976	0.997023	1.02
type 2 diabetes	rs6059743	20	32847711	G	-9.0482e-05	0.59062	0.4169	0.3871	genotyped	0.986
type 2 diabetes	rs6142321	20	33788474	A	8.9395e-05	0.59355	0.438102	0.6546	0.991452	1.01
type 2 diabetes	rs7263251	20	33554320	C	9.2948e-05	0.59559	0.338133	0.5101	0.997109	1.01
type 2 diabetes	rs6060133	20	33558011	C	9.2914e-05	0.59571	0.338133	0.5003	0.997281	1.01
type 2 diabetes	rs6142322	20	33788538	A	8.8869e-05	0.59575	0.438314	0.6422	0.990675	1.01
type 2 diabetes	rs6142320	20	33788193	G	8.8542e-05	0.59707	0.438145	0.6446	0.991461	1.01
type 2 diabetes	rs6060127	20	33538999	C	9.2652e-05	0.59721	0.337164	0.464	0.995958	1.01
type 2 diabetes	rs6060128	20	33540587	T	9.264e-05	0.5973	0.337135	0.4664	0.995831	1.01
type 2 diabetes	rs1577924	20	33784288	G	8.844e-05	0.5974	0.43832	0.6571	0.991583	1.01
type 2 diabetes	rs17310328	20	33540565	C	9.2578e-05	0.59754	0.337137	0.4641	0.99584	1.01
type 2 diabetes	rs6088660	20	33542896	T	9.2034e-05	0.59963	0.337167	0.4712	0.996174	1.01
type 2 diabetes	rs4911475	20	33780334	A	8.7868e-05	0.59968	0.437978	0.6372	0.992619	1.01
type 2 diabetes	rs35024451	20	33542081	C	9.1925e-05	0.60006	0.337182	0.4735	0.996168	1.01
type 2 diabetes	rs150385410	20	33543429	G	0.00047077	0.60134	0.00894007	0.373	0.942515	1.08
type 2 diabetes	rs2093059	20	33791310	C	8.7552e-05	0.60185	0.438535	0.6921	0.986803	1.01
type 2 diabetes	rs1987165	20	33756206	C	-8.7221e-05	0.60197	0.437223	0.4911	0.99604	0.986
type 2 diabetes	rs4911478	20	33782625	C	8.725e-05	0.60234	0.438373	0.6521	0.991362	1.01
type 2 diabetes	rs17092195	20	33559251	C	9.0724e-05	0.60446	0.338057	0.4763	0.997183	1.01
type 2 diabetes	rs2103971	20	33786256	C	8.6724e-05	0.6046	0.438228	0.6521	0.991387	1.01
type 2 diabetes	rs6088665	20	33551218	G	9.0663e-05	0.60477	0.338008	0.46	0.996736	1.01
type 2 diabetes	rs4911476	20	33780768	C	8.6597e-05	0.605	0.438249	0.6298	0.991951	1.01
type 2 diabetes	rs34515766	20	33785221	G	8.6577e-05	0.60515	0.438373	0.6597	0.991545	1.01
type 2 diabetes	rs8183502	20	32805399	A	9.2713e-05	0.60603	0.310408	0.3482	0.991902	1.01
type 2 diabetes	rs74786956	20	33786043	C	8.617e-05	0.60688	0.43842	0.6647	0.991114	1.01
type 2 diabetes	rs6088747	20	33754604	T	-8.6107e-05	0.60692	0.439343	0.3814	0.993868	0.987
type 2 diabetes	rs6142313	20	33780427	G	8.581e-05	0.60825	0.438257	0.6521	0.992108	1.01
type 2 diabetes	rs6060151	20	33594226	T	8.6899e-05	0.61016	0.3881	0.0148	genotyped	1.01
type 2 diabetes	rs7263157	20	33459127	A	8.6676e-05	0.61191	0.377776	0.8702	0.997973	1.01
type 2 diabetes	rs819135	20	32847767	G	8.4328e-05	0.61585	0.416849	0.534	0.998932	1.01
type 2 diabetes	rs8114671	20	33789142	A	8.3527e-05	0.61806	0.437865	0.6874	0.990913	1.01
type 2 diabetes	rs6087571	20	32912091	G	-0.00012195	0.61831	0.136428	0.2923	0.972198	0.981
type 2 diabetes	rs35381853	20	33790171	C	8.3187e-05	0.61982	0.437973	0.6848	0.988635	1.01
type 2 diabetes	rs6120758	20	33492523	T	8.4331e-05	0.62244	0.3788	0.258	genotyped	1.01
type 2 diabetes	rs6142324	20	33789043	T	8.2241e-05	0.62349	0.43793	0.6874	0.990603	1.01
type 2 diabetes	rs6119536	20	33450041	T	8.3893e-05	0.62378	0.377598	0.9768	0.995407	1.01
type 2 diabetes	rs6060130	20	33549319	T	8.3214e-05	0.62408	0.392758	0.6989	0.996082	1.01
type 2 diabetes	rs34542479	20	33790120	G	8.1703e-05	0.62604	0.438058	0.6873	0.988825	1.01
type 2 diabetes	rs6088658	20	33540489	C	8.5156e-05	0.62716	0.337402	0.4712	0.995746	1.01
type 2 diabetes	rs2093058	20	33791281	A	8.1367e-05	0.62782	0.43793	0.687	0.986964	1.01
type 2 diabetes	rs3761144	20	33544075	G	8.2267e-05	0.62823	0.39263	0.6962	0.995109	1.01
type 2 diabetes	rs2378261	20	33538384	T	8.4357e-05	0.63038	0.337448	0.4665	0.995834	1.01
type 2 diabetes	rs6088622	20	33419977	A	8.1332e-05	0.63385	0.380911	0.6953	0.996039	1.01
type 2 diabetes	rs6088744	20	33750142	C	-7.8476e-05	0.6363	0.478193	0.2069	0.997855	0.988
type 2 diabetes	rs2378262	20	33550774	G	7.8962e-05	0.64189	0.392536	0.7363	0.996453	1.01
type 2 diabetes	rs11546155	20	33451148	A	-0.00010749	0.64276	0.162815	0.9493	0.929391	0.983
type 2 diabetes	rs6060132	20	33556695	A	8.1232e-05	0.64371	0.334256	0.5866	0.996923	1.01
type 2 diabetes	rs6087644	20	33480917	C	7.9269e-05	0.64374	0.37416	0.8582	0.995165	1.01
type 2 diabetes	rs7260770	20	33552653	A	7.9629e-05	0.65033	0.334313	0.5656	0.996424	1.01
type 2 diabetes	rs6141534	20	33704836	T	7.444e-05	0.65621	0.433197	0.6589	0.997931	1.01
type 2 diabetes	rs6141488	20	33192746	G	-7.888e-05	0.65718	0.32726	0.3667	0.985915	0.988
type 2 diabetes	rs1885114	20	33577361	G	7.3996e-05	0.65833	0.434212	0.757	0.996112	1.01
type 2 diabetes	rs2038503	20	33675900	A	7.3893e-05	0.65861	0.433013	0.7305	0.997893	1.01
type 2 diabetes	rs2180847	20	33667763	T	7.5038e-05	0.65895	0.388089	0.4131	0.999145	1.01
type 2 diabetes	rs8116198	20	33114201	A	0.00010563	0.66022	0.1387	0.09649	genotyped	1.02
type 2 diabetes	rs4911167	20	33590096	G	7.4673e-05	0.66047	0.388153	0.4531	0.999194	1.01
type 2 diabetes	rs1058003	20	33590417	A	7.4557e-05	0.66113	0.387825	0.4445	0.99859	1.01
type 2 diabetes	rs6087670	20	33662269	T	7.4131e-05	0.66278	0.388128	0.4111	0.999293	1.01
type 2 diabetes	rs1885119	20	33645649	C	7.3875e-05	0.66388	0.388036	0.4488	0.999357	1.01
type 2 diabetes	rs10875491	20	33614145	A	7.3813e-05	0.66409	0.388043	0.4467	0.999568	1.01
type 2 diabetes	rs6060205	20	33658869	A	7.3744e-05	0.66444	0.388115	0.409	0.999266	1.01
type 2 diabetes	rs6087658	20	33606204	G	7.3677e-05	0.66466	0.388082	0.4531	0.999736	1.01
type 2 diabetes	rs6060167	20	33620611	A	7.3614e-05	0.66493	0.388077	0.4531	0.999753	1.01
type 2 diabetes	rs6058166	20	33656710	G	7.3625e-05	0.66495	0.388112	0.407	0.999272	1.01
type 2 diabetes	rs4911460	20	33624330	A	7.3423e-05	0.66575	0.388069	0.4488	0.999762	1.01
type 2 diabetes	rs6060170	20	33624466	G	7.3423e-05	0.66575	0.388069	0.4488	0.999762	1.01
type 2 diabetes	rs6060162	20	33611461	G	7.3416e-05	0.66577	0.388067	0.4531	0.999743	1.01
type 2 diabetes	rs6088687	20	33624750	A	7.3417e-05	0.66577	0.388068	0.4488	0.999759	1.01
type 2 diabetes	rs6060175	20	33631936	A	7.3417e-05	0.6658	0.388085	0.4467	0.999553	1.01
type 2 diabetes	rs6087660	20	33616528	C	7.3378e-05	0.66594	0.388064	0.451	0.99964	1.01
type 2 diabetes	rs6060164	20	33616314	G	7.333e-05	0.66614	0.388063	0.4531	0.99964	1.01
type 2 diabetes	rs10875492	20	33631407	T	7.3303e-05	0.66626	0.388066	0.4467	0.999756	1.01
type 2 diabetes	rs1358854	20	33633659	A	7.3304e-05	0.66626	0.388066	0.4467	0.999756	1.01
type 2 diabetes	rs3803938	20	33632600	T	7.3303e-05	0.66626	0.388066	0.4467	0.999756	1.01
type 2 diabetes	rs35193912	20	33785050	T	7.2265e-05	0.66639	0.435823	0.6441	0.990929	1.01
type 2 diabetes	rs2425011	20	33581689	C	7.3155e-05	0.66691	0.387949	0.5345	0.999401	1.01
type 2 diabetes	rs2065978	20	33767291	T	-7.1825e-05	0.66699	0.437857	0.5671	0.999578	0.989
type 2 diabetes	rs4911169	20	33593834	A	7.3063e-05	0.66728	0.388032	0.4297	0.999864	1.01
type 2 diabetes	rs4911168	20	33593789	G	7.2995e-05	0.66756	0.38805	0.4318	0.999897	1.01
type 2 diabetes	rs6088692	20	33638588	G	7.2868e-05	0.66813	0.388053	0.4402	0.99973	1.01
type 2 diabetes	rs6142283	20	33639206	T	7.2867e-05	0.66813	0.388053	0.4402	0.999731	1.01
type 2 diabetes	rs6120785	20	33580237	G	7.2854e-05	0.6682	0.387939	0.5393	0.999441	1.01
type 2 diabetes	rs4911462	20	33642732	T	7.2852e-05	0.66821	0.388066	0.4402	0.999679	1.01
type 2 diabetes	rs2425013	20	33582731	T	7.2808e-05	0.66844	0.388027	0.4973	0.999144	1.01
type 2 diabetes	rs4911463	20	33642737	A	7.2796e-05	0.66844	0.388056	0.4402	0.999715	1.01
type 2 diabetes	rs6120816	20	33644358	C	7.2565e-05	0.66943	0.388047	0.4402	0.99972	1.01
type 2 diabetes	rs1415773	20	33765585	A	-7.1267e-05	0.66958	0.437631	0.5765	0.998739	0.989
type 2 diabetes	rs6088704	20	33677621	C	7.2451e-05	0.67007	0.388003	0.4616	0.998439	1.01
type 2 diabetes	rs6060214	20	33677669	T	7.2357e-05	0.67047	0.388003	0.4595	0.998436	1.01
type 2 diabetes	rs3746427	20	33730464	G	-7.1054e-05	0.67085	0.438	0.1458	genotyped	0.989
type 2 diabetes	rs6060212	20	33676951	C	7.2265e-05	0.67089	0.388017	0.4682	0.998348	1.01
type 2 diabetes	rs2057324	20	33656561	A	7.1046e-05	0.67091	0.432811	0.6117	0.998709	1.01
type 2 diabetes	rs6060215	20	33677860	A	7.196e-05	0.67217	0.387987	0.453	0.998492	1.01
type 2 diabetes	rs2425010	20	33581540	T	7.1258e-05	0.67506	0.38802	0.5608	0.999297	1.01
type 2 diabetes	rs6060285	20	33770487	T	-6.955e-05	0.67693	0.437959	0.5789	0.999604	0.989
type 2 diabetes	rs2069944	20	33761498	G	-6.9439e-05	0.6775	0.437222	0.6346	0.999231	0.989
type 2 diabetes	rs2378337	20	33771435	A	-6.9192e-05	0.67922	0.4385	0.05844	genotyped	0.989
type 2 diabetes	rs4911165	20	33550382	C	7.2538e-05	0.67944	0.335038	0.6325	0.996541	1.01
type 2 diabetes	rs2180485	20	33278442	C	7.0762e-05	0.68111	0.367106	0.8915	0.994252	1.01
type 2 diabetes	rs6058106	20	33278255	C	7.0684e-05	0.68145	0.367105	0.8973	0.994064	1.01
type 2 diabetes	rs9574	20	33764632	G	-6.8437e-05	0.68187	0.437522	0.5601	0.999493	0.989
type 2 diabetes	rs2069948	20	33762489	T	-6.8361e-05	0.68224	0.437225	0.6297	0.999191	0.989
type 2 diabetes	rs1984588	20	33435874	C	6.9912e-05	0.68276	0.377392	0.9797	0.995584	1.01
type 2 diabetes	rs2104083	20	33649133	A	6.8265e-05	0.68303	0.432723	0.674	0.999037	1.01
type 2 diabetes	rs6059987	20	33277731	A	7.0259e-05	0.68335	0.366745	0.8915	0.994106	1.01
type 2 diabetes	rs4911166	20	33573377	A	6.9223e-05	0.68356	0.390512	0.4627	0.998546	1.01
type 2 diabetes	rs6058150	20	33556817	T	7.1461e-05	0.68412	0.33446	0.5451	0.996537	1.01
type 2 diabetes	rs6088760	20	33773266	C	7.4486e-05	0.68413	0.287361	0.7359	0.998547	1.01
type 2 diabetes	rs2104084	20	33649217	C	6.7942e-05	0.68445	0.432827	0.6613	0.998905	1.01
type 2 diabetes	rs6142222	20	33281736	T	6.96e-05	0.68611	0.366783	0.9501	0.994436	1.01
type 2 diabetes	rs1998231	20	33598419	T	6.8506e-05	0.68686	0.388235	0.4361	0.999922	1.01
type 2 diabetes	rs945960	20	33762854	G	-6.7122e-05	0.6877	0.437241	0.5484	0.999351	0.989
type 2 diabetes	rs6060197	20	33654315	T	6.7196e-05	0.68781	0.432639	0.5875	0.998554	1.01
type 2 diabetes	rs1415774	20	33765616	G	-6.6949e-05	0.68852	0.43764	0.5812	0.998722	0.99
type 2 diabetes	rs6142284	20	33641367	A	6.6894e-05	0.68901	0.432769	0.6765	0.999353	1.01
type 2 diabetes	rs66535333	20	33656666	A	6.6826e-05	0.6894	0.432931	0.6142	0.998694	1.01
type 2 diabetes	rs2069952	20	33763951	T	-6.6676e-05	0.68963	0.437426	0.598	0.99941	0.99
type 2 diabetes	rs1407203	20	33651979	T	6.7824e-05	0.69001	0.388495	0.4214	0.998233	1.01
type 2 diabetes	rs3746432	20	33592763	T	6.6567e-05	0.6905	0.434287	0.5852	0.998267	1.01
type 2 diabetes	rs6060199	20	33654773	G	6.6407e-05	0.69126	0.432646	0.5875	0.998731	1.01
type 2 diabetes	rs3761143	20	33545745	T	6.7048e-05	0.69255	0.395826	0.8247	0.995806	1.01
type 2 diabetes	rs2145559	20	33651725	A	6.5956e-05	0.69328	0.432565	0.6214	0.998419	1.01
type 2 diabetes	rs6088758	20	33769203	G	-6.5739e-05	0.69375	0.437411	0.598	0.999468	0.99
type 2 diabetes	rs2069943	20	33761408	C	-6.572e-05	0.69392	0.437164	0.6297	0.998999	0.99
type 2 diabetes	rs6141504	20	33281651	G	6.7581e-05	0.69474	0.366864	0.953	0.994291	1.01
type 2 diabetes	rs633198	20	33778434	C	6.5567e-05	0.69476	0.438413	0.6323	0.996697	1.01
type 2 diabetes	rs6088578	20	33281604	T	6.751e-05	0.69505	0.366866	0.956	0.994297	1.01
type 2 diabetes	rs2425012	20	33581955	A	6.5278e-05	0.69613	0.433035	0.6842	0.99919	1.01
type 2 diabetes	rs6142290	20	33654672	C	6.5069e-05	0.69718	0.432532	0.6165	0.998684	1.01
type 2 diabetes	rs4616	20	33590358	T	6.4753e-05	0.69849	0.432631	0.5971	0.99913	1.01
type 2 diabetes	rs6087683	20	33774444	T	-6.3924e-05	0.70171	0.438488	0.6398	0.999375	0.99
type 2 diabetes	rs6060165	20	33619480	C	6.3504e-05	0.70396	0.433159	0.6339	0.999453	1.01
type 2 diabetes	rs6058154	20	33585834	A	6.3431e-05	0.70427	0.433059	0.6314	0.999687	1.01
type 2 diabetes	rs13038162	20	33678071	T	6.4595e-05	0.70436	0.389005	0.4704	0.995426	1.01
type 2 diabetes	rs6060168	20	33621017	C	6.3281e-05	0.705	0.433066	0.624	0.999226	1.01
type 2 diabetes	rs6060216	20	33678078	C	6.4407e-05	0.70517	0.388988	0.4704	0.995495	1.01
type 2 diabetes	rs2038504	20	33648187	C	6.3212e-05	0.70534	0.43285	0.6689	0.999049	1.01
type 2 diabetes	rs635279	20	33778882	T	6.3121e-05	0.70577	0.437901	0.6697	0.995769	1.01
type 2 diabetes	rs6142276	20	33620332	C	6.2834e-05	0.70693	0.433092	0.6413	0.999592	1.01
type 2 diabetes	rs13042358	20	33634479	A	6.2724e-05	0.7075	0.432578	0.6562	0.999323	1.01
type 2 diabetes	rs6141526	20	33615255	T	6.2345e-05	0.70918	0.432418	0.6764	0.999218	1.01
type 2 diabetes	rs4911461	20	33629993	C	6.2059e-05	0.71042	0.432919	0.674	0.999363	1.01
type 2 diabetes	rs6058202	20	33777983	G	-6.1973e-05	0.71066	0.438005	0.6596	0.997468	0.99
type 2 diabetes	rs6059909	20	33139691	A	6.1576e-05	0.71143	0.486502	0.6002	0.990408	1.01
type 2 diabetes	rs6058161	20	33620026	T	6.1747e-05	0.7118	0.432939	0.6488	0.999471	1.01
type 2 diabetes	rs6120778	20	33565169	C	-6.1821e-05	0.71214	0.4297	0.1762	genotyped	0.99
type 2 diabetes	rs6060303	20	33785956	G	-6.6809e-05	0.71607	0.287433	0.7675	0.990949	0.99
type 2 diabetes	rs6088753	20	33768252	T	-6.0212e-05	0.71825	0.440259	0.5865	0.998529	0.991
type 2 diabetes	rs2065979	20	33767690	C	-6.0291e-05	0.71842	0.439418	0.6048	0.995411	0.991
type 2 diabetes	rs6060163	20	33611738	C	6.4935e-05	0.71874	0.302138	0.2122	0.99948	1.01
type 2 diabetes	rs6060159	20	33610546	G	6.4853e-05	0.71908	0.302142	0.2122	0.999419	1.01
type 2 diabetes	rs1407202	20	33651967	T	5.9986e-05	0.71997	0.432062	0.6337	0.997443	1.01
type 2 diabetes	rs7268701	20	32901960	T	6.0862e-05	0.71999	0.441511	0.2835	0.962227	1.01
type 2 diabetes	rs4911472	20	33775377	A	-5.9827e-05	0.72005	0.438002	0.6672	0.99918	0.991
type 2 diabetes	rs6088570	20	33268295	C	6.1468e-05	0.72039	0.370041	0.5931	0.997239	1.01
type 2 diabetes	rs4911437	20	33266149	T	6.1106e-05	0.72198	0.369524	0.5482	0.998199	1.01
type 2 diabetes	rs6088575	20	33273403	G	6.1147e-05	0.72203	0.369754	0.5803	0.995214	1.01
type 2 diabetes	rs6060194	20	33649930	C	6.4019e-05	0.72256	0.302236	0.1992	0.999277	1.01
type 2 diabetes	rs6088618	20	33409350	A	5.8952e-05	0.72392	0.437675	0.2583	0.9982	1.01
type 2 diabetes	rs1544047	20	33670753	C	5.8973e-05	0.72439	0.432857	0.5828	0.998139	1.01
type 2 diabetes	rs3803936	20	33632775	C	5.8522e-05	0.72621	0.432924	0.6314	0.999619	1.01
type 2 diabetes	rs6142294	20	33671497	G	5.8548e-05	0.72649	0.431917	0.7383	0.996808	1.01
type 2 diabetes	rs6087614	20	33262874	C	6.0018e-05	0.72669	0.36957	0.5531	0.998515	1.01
type 2 diabetes	rs2424999	20	33386430	A	5.9466e-05	0.72848	0.377224	0.6999	0.993514	1.01
type 2 diabetes	rs4263187	20	33773283	C	-5.7701e-05	0.72956	0.438061	0.6697	0.999496	0.991
type 2 diabetes	rs3761142	20	33545816	T	6.0693e-05	0.7297	0.334435	0.5631	0.996282	1.01
type 2 diabetes	rs6142280	20	33622242	C	5.733e-05	0.73161	0.432846	0.6215	0.999194	1.01
type 2 diabetes	rs1853056	20	33262058	T	5.8743e-05	0.73218	0.370186	0.5656	0.998401	1.01
type 2 diabetes	rs2425008	20	33574022	C	5.7359e-05	0.7354	0.391195	0.4566	0.999254	1.01
type 2 diabetes	rs6119558	20	33574493	C	5.7312e-05	0.7356	0.391161	0.448	0.999558	1.01
type 2 diabetes	rs6060139	20	33566499	C	-5.6477e-05	0.73606	0.429033	0.717	0.996831	0.991
type 2 diabetes	rs6088666	20	33564570	G	-5.6379e-05	0.7361	0.429787	0.6407	0.999611	0.991
type 2 diabetes	rs7262274	20	33413176	C	5.7036e-05	0.73839	0.379091	0.7914	0.997627	1.01
type 2 diabetes	rs4602286	20	33772707	T	-5.556e-05	0.73914	0.440948	0.6476	0.998455	0.991
type 2 diabetes	rs6088664	20	33551100	A	5.621e-05	0.74022	0.395763	0.909	0.996258	1.01
type 2 diabetes	rs11167239	20	33140472	A	5.504e-05	0.74051	0.48571	0.6292	0.993389	1.01
type 2 diabetes	rs2425006	20	33571228	G	5.5282e-05	0.74111	0.429889	0.6357	0.999038	1.01
type 2 diabetes	rs1885118	20	33567860	C	5.5906e-05	0.7419	0.391009	0.4458	0.999432	1.01
type 2 diabetes	rs6059913	20	33143288	A	5.3994e-05	0.74522	0.485679	0.6195	0.99385	1.01
type 2 diabetes	rs6060301	20	33783242	T	-5.9633e-05	0.74544	0.287338	0.7485	0.990915	0.991
type 2 diabetes	rs6087633	20	33408137	G	5.507e-05	0.74698	0.379196	0.7858	0.998511	1.01
type 2 diabetes	rs6060140	20	33566507	A	-5.2189e-05	0.75545	0.428847	0.6989	0.99661	0.992
type 2 diabetes	rs734308	20	33572096	G	5.1967e-05	0.75612	0.429576	0.5989	0.999015	1.01
type 2 diabetes	rs745849	20	33572178	A	5.1837e-05	0.75671	0.429581	0.6086	0.999208	1.01
type 2 diabetes	rs6141523	20	33569417	A	5.1741e-05	0.75711	0.429628	0.6332	0.999501	1.01
type 2 diabetes	rs6142216	20	33256036	A	5.2385e-05	0.76002	0.371242	0.6089	0.998678	1.01
type 2 diabetes	rs632688	20	33778287	C	-5.7047e-05	0.76091	0.267398	0.8277	0.994685	0.991
type 2 diabetes	rs4911474	20	33780297	G	-5.5881e-05	0.76094	0.286831	0.7514	0.992262	0.991
type 2 diabetes	rs2425005	20	33407715	C	5.1318e-05	0.76371	0.379005	0.7774	0.998221	1.01
type 2 diabetes	rs6120675	20	33138870	C	4.9786e-05	0.76439	0.486867	0.6965	0.993998	1.01
type 2 diabetes	rs6088565	20	33254986	C	5.0805e-05	0.76707	0.370956	0.566	0.999149	1.01
type 2 diabetes	rs6060299	20	33780508	G	-5.4371e-05	0.76722	0.286877	0.7737	0.99185	0.991
type 2 diabetes	rs6060135	20	33563936	G	4.9743e-05	0.76731	0.416996	0.3959	0.997518	1.01
type 2 diabetes	rs6060305	20	33788582	G	-5.3869e-05	0.76947	0.286969	0.7705	0.989909	0.992
type 2 diabetes	rs6059918	20	33150503	T	4.8496e-05	0.77019	0.48687	0.7374	0.995191	1.01
type 2 diabetes	rs7274854	20	33228672	A	4.9848e-05	0.77125	0.371258	0.5911	0.999329	1.01
type 2 diabetes	rs13042351	20	33238573	A	4.8913e-05	0.77542	0.371265	0.5936	0.999411	1.01
type 2 diabetes	rs6060003	20	33294945	T	-4.6722e-05	0.77928	0.4473	0.8331	genotyped	0.993
type 2 diabetes	rs1415775	20	33765771	C	-5.1118e-05	0.78114	0.2871	0.001419	genotyped	0.992
type 2 diabetes	rs4911158	20	33239512	T	-4.7527e-05	0.78201	0.3717	0.1445	genotyped	0.993
type 2 diabetes	rs6060304	20	33788350	T	-5.0795e-05	0.78224	0.286971	0.742	0.990623	0.992
type 2 diabetes	rs6087600	20	33157217	C	4.5175e-05	0.78552	0.485669	0.6394	0.995704	1.01
type 2 diabetes	rs6088527	20	33155841	T	4.4942e-05	0.7866	0.485678	0.6443	0.995702	1.01
type 2 diabetes	rs2224320	20	33791590	C	-4.9868e-05	0.78668	0.286751	0.7953	0.985549	0.992
type 2 diabetes	rs1415772	20	33765583	G	5.0669e-05	0.78696	0.267443	0.7377	0.995021	1.01
type 2 diabetes	rs764597	20	33161225	A	4.4836e-05	0.78709	0.485678	0.6369	0.995761	1.01
type 2 diabetes	rs1884669	20	33171287	A	4.4074e-05	0.79061	0.485738	0.6296	0.995829	1.01
type 2 diabetes	rs2295444	20	33173883	T	4.3692e-05	0.79239	0.485762	0.6127	0.995834	1.01
type 2 diabetes	rs3891369	20	33161127	T	4.3618e-05	0.79277	0.485299	0.5818	0.995174	1.01
type 2 diabetes	rs6142147	20	32953344	G	4.707e-05	0.79429	0.302506	0.1981	0.998523	1.01
type 2 diabetes	rs6088528	20	33156742	A	4.307e-05	0.79531	0.485807	0.6442	0.995157	1.01
type 2 diabetes	rs6142152	20	32960877	A	4.6622e-05	0.79624	0.302481	0.201	0.998034	1.01
type 2 diabetes	rs6059926	20	33164804	T	4.2861e-05	0.79625	0.485778	0.674	0.995759	1.01
type 2 diabetes	rs6579218	20	33709846	C	4.6333e-05	0.79754	0.300862	0.198	0.998788	1.01
type 2 diabetes	rs6060307	20	33792932	C	-4.3919e-05	0.81181	0.286567	0.8499	0.983151	0.993
type 2 diabetes	rs72497006	20	32909056	A	4.2639e-05	0.81367	0.302752	0.1967	0.993429	1.01
type 2 diabetes	rs6141513	20	33374402	C	-3.9637e-05	0.81639	0.379133	0.7773	0.998337	0.994
type 2 diabetes	rs1205340	20	32923871	A	-3.8092e-05	0.81872	0.496008	0.7118	0.992426	0.994
type 2 diabetes	rs2295886	20	33713975	C	-4.0694e-05	0.8198	0.3195	0.0002578	genotyped	0.994
type 2 diabetes	rs6059938	20	33187130	A	3.7773e-05	0.82001	0.48275	0.4939	0.996304	1.01
type 2 diabetes	rs6088466	20	32913534	A	4.0563e-05	0.82245	0.303065	0.1765	0.994651	1.01
type 2 diabetes	rs6142129	20	32819871	G	3.9872e-05	0.82253	0.320377	0.8538	0.996431	1.01
type 2 diabetes	rs6087605	20	33180624	T	3.7095e-05	0.82318	0.482677	0.5312	0.996271	1.01
type 2 diabetes	rs6088525	20	33141272	C	3.9175e-05	0.82435	0.332949	0.5247	0.990377	1.01
type 2 diabetes	rs6088536	20	33189106	C	3.6843e-05	0.82437	0.482728	0.4896	0.996292	1.01
type 2 diabetes	rs6058084	20	33183804	T	3.6645e-05	0.8253	0.482691	0.5245	0.996215	1.01
type 2 diabetes	rs6058165	20	33640840	T	3.9489e-05	0.82621	0.305171	0.259	0.999344	1.01
type 2 diabetes	rs2424993	20	33104592	C	-3.9359e-05	0.82764	0.3019	0.02554	genotyped	0.994
type 2 diabetes	rs6059932	20	33175466	T	3.5832e-05	0.82913	0.482864	0.5562	0.995935	1.01
type 2 diabetes	rs1205336	20	32926336	A	-3.5707e-05	0.82983	0.496187	0.7118	0.993287	0.994
type 2 diabetes	rs4911464	20	33659122	A	3.8266e-05	0.83148	0.305076	0.2474	0.999769	1.01
type 2 diabetes	rs6059934	20	33178324	T	3.5245e-05	0.83189	0.482326	0.4851	0.995768	1.01
type 2 diabetes	rs6060201	20	33655813	G	3.8137e-05	0.83205	0.305074	0.2409	0.999759	1.01
type 2 diabetes	rs2180850	20	33655308	C	3.811e-05	0.83216	0.305072	0.2425	0.999757	1.01
type 2 diabetes	rs6142300	20	33705708	C	-3.75e-05	0.83295	0.318769	0.2753	0.99897	0.994
type 2 diabetes	rs17092378	20	33736188	T	3.9507e-05	0.83321	0.264952	0.5316	0.999088	1.01
type 2 diabetes	rs2295885	20	33713963	C	-3.7209e-05	0.83428	0.318493	0.284	0.998869	0.994
type 2 diabetes	rs6058192	20	33734261	G	3.9237e-05	0.83434	0.264904	0.546	0.999165	1.01
type 2 diabetes	rs6088722	20	33706187	C	-3.7176e-05	0.83436	0.318765	0.2719	0.999103	0.994
type 2 diabetes	rs6060196	20	33653617	G	3.7502e-05	0.8348	0.305096	0.2442	0.999697	1.01
type 2 diabetes	rs2050652	20	33733180	G	-3.9214e-05	0.83519	0.2639	0.05367	genotyped	0.994
type 2 diabetes	rs2064705	20	33031276	C	-3.754e-05	0.83531	0.302527	0.1778	0.998048	0.994
type 2 diabetes	rs959829	20	33346047	C	-3.5383e-05	0.83583	0.378983	0.7606	0.997926	0.994
type 2 diabetes	rs6088523	20	33135550	G	3.6597e-05	0.83585	0.331973	0.5046	0.990274	1.01
type 2 diabetes	rs6060193	20	33648433	T	3.7202e-05	0.8361	0.305042	0.2642	0.999811	1.01
type 2 diabetes	rs2180849	20	33648239	A	3.7184e-05	0.83618	0.305042	0.2659	0.999817	1.01
type 2 diabetes	rs6142154	20	32970673	T	3.7335e-05	0.83618	0.302474	0.1871	0.998287	1.01
type 2 diabetes	rs11167234	20	32983619	A	3.7173e-05	0.83687	0.302494	0.183	0.997543	1.01
type 2 diabetes	rs2180848	20	33619111	G	3.6969e-05	0.8371	0.305031	0.2764	0.999889	1.01
type 2 diabetes	rs6060156	20	33610145	G	3.6797e-05	0.83785	0.305145	0.2873	0.999636	1.01
type 2 diabetes	rs1884667	20	33285505	A	-3.3996e-05	0.83827	0.452209	0.4993	0.995704	0.995
type 2 diabetes	rs6120810	20	33626249	G	3.6683e-05	0.83835	0.30502	0.2746	0.999957	1.01
type 2 diabetes	rs6060243	20	33698119	C	-3.6247e-05	0.83862	0.31898	0.2957	0.996362	0.994
type 2 diabetes	rs6060173	20	33629082	T	3.6575e-05	0.83882	0.305017	0.2746	0.999953	1.01
type 2 diabetes	rs2425014	20	33583114	C	3.6528e-05	0.83907	0.304955	0.3131	0.999231	1.01
type 2 diabetes	rs3746430	20	33593674	C	3.6446e-05	0.83938	0.305019	0.2694	0.999912	1.01
type 2 diabetes	rs4142034	20	33643256	G	3.6435e-05	0.83943	0.305015	0.2676	0.999956	1.01
type 2 diabetes	rs1884668	20	33285514	G	-3.3751e-05	0.83944	0.45214	0.4905	0.995582	0.995
type 2 diabetes	rs4142007	20	32990050	T	-3.3526e-05	0.83975	0.494425	0.7586	0.997736	0.995
type 2 diabetes	rs1998232	20	33601959	G	3.6358e-05	0.83976	0.305015	0.2711	0.999944	1.01
type 2 diabetes	rs6087598	20	33140934	A	3.5587e-05	0.8402	0.332147	0.4972	0.991722	1.01
type 2 diabetes	rs6060154	20	33599601	C	3.6247e-05	0.84024	0.305029	0.2694	0.999883	1.01
type 2 diabetes	rs6058179	20	33689328	G	-3.5858e-05	0.84025	0.31889	0.2855	0.997507	0.994
type 2 diabetes	rs2152918	20	33740209	G	3.7629e-05	0.84109	0.264911	0.5518	0.998484	1.01
type 2 diabetes	rs6059991	20	33280836	T	-3.3322e-05	0.84153	0.451849	0.4155	0.994513	0.995
type 2 diabetes	rs6088580	20	33285053	C	-3.3222e-05	0.84191	0.452179	0.4883	0.995727	0.995
type 2 diabetes	rs7271970	20	32987666	G	-3.2997e-05	0.84222	0.49449	0.7638	0.998345	0.995
type 2 diabetes	rs6119559	20	33601601	G	3.5774e-05	0.84227	0.305181	0.2891	0.999539	1.01
type 2 diabetes	rs6060217	20	33678134	G	3.5389e-05	0.8441	0.305453	0.2473	0.997368	1.01
type 2 diabetes	rs62212172	20	32987705	A	-3.2435e-05	0.84487	0.494521	0.7431	0.998165	0.995
type 2 diabetes	rs1205344	20	32918298	A	-3.2229e-05	0.84598	0.491698	0.7847	0.995864	0.995
type 2 diabetes	rs2295352	20	33320055	G	-3.3159e-05	0.84602	0.378589	0.7141	0.998281	0.995
type 2 diabetes	rs12480410	20	32988678	T	-3.1812e-05	0.84782	0.494503	0.7482	0.998296	0.995
type 2 diabetes	rs1569780	20	33429907	C	3.2618e-05	0.84847	0.395281	0.9139	0.983867	1.01
type 2 diabetes	rs6060250	20	33704108	C	-3.394e-05	0.8487	0.318787	0.2853	0.997587	0.995
type 2 diabetes	rs6058186	20	33701835	G	-3.3392e-05	0.85107	0.318858	0.2997	0.997994	0.995
type 2 diabetes	rs6058184	20	33701483	C	-3.3321e-05	0.85139	0.318861	0.2979	0.997996	0.995
type 2 diabetes	rs6059956	20	33220070	C	3.0843e-05	0.85237	0.484625	0.6943	0.999177	1
type 2 diabetes	rs6120827	20	33672123	T	3.3023e-05	0.85435	0.304589	0.2605	0.99986	1.01
type 2 diabetes	rs6087567	20	32825638	T	-3.2065e-05	0.85709	0.3202	0.08403	genotyped	0.995
type 2 diabetes	rs6087663	20	33625526	G	3.1326e-05	0.86279	0.3048	0.001121	genotyped	1
type 2 diabetes	rs3053708	20	33575347	CAT	3.0855e-05	0.86491	0.3028	4.567e-09	genotyped	1
type 2 diabetes	rs2889874	20	33715777	T	-2.8092e-05	0.86722	0.454041	0.6201	0.978144	0.996
type 2 diabetes	rs6059992	20	33282275	C	-2.7523e-05	0.8688	0.452218	0.5101	0.994883	0.996
type 2 diabetes	rs752449	20	33592474	G	2.9219e-05	0.87098	0.304665	0.278	0.999529	1
type 2 diabetes	rs73106933	20	33287425	C	-2.6925e-05	0.87178	0.451384	0.6095	0.992839	0.996
type 2 diabetes	rs6142272	20	33613371	G	2.8525e-05	0.87398	0.304762	0.287	0.999798	1
type 2 diabetes	rs6088677	20	33607464	T	2.834e-05	0.87479	0.304751	0.2888	0.999805	1
type 2 diabetes	rs4911465	20	33670856	A	2.8246e-05	0.87519	0.305179	0.2394	0.999522	1
type 2 diabetes	rs6060180	20	33638013	G	2.8089e-05	0.8759	0.304749	0.278	0.999924	1
type 2 diabetes	rs6088693	20	33640342	G	2.8006e-05	0.87626	0.304745	0.278	0.99993	1
type 2 diabetes	rs2281626	20	33637606	G	2.7828e-05	0.87704	0.304739	0.2744	0.999919	1
type 2 diabetes	rs6059989	20	33279604	G	-2.4255e-05	0.88428	0.451678	0.4355	0.994878	0.996
type 2 diabetes	rs6060124	20	33536897	A	-2.6119e-05	0.88439	0.309663	0.2409	0.992465	0.996
type 2 diabetes	rs666210	20	33723810	C	-2.6836e-05	0.88682	0.262183	0.5164	0.995753	0.996
type 2 diabetes	rs6579186	20	33282198	C	-2.3445e-05	0.88811	0.451942	0.528	0.994993	0.996
type 2 diabetes	rs3736802	20	33604042	C	2.0954e-05	0.89934	0.484136	0.4689	0.999592	1
type 2 diabetes	rs8115656	20	33282780	C	-2.0688e-05	0.90125	0.451292	0.5234	0.994312	0.997
type 2 diabetes	rs6142209	20	33220984	T	-2.1812e-05	0.90133	0.3366	0.07358	genotyped	0.997
type 2 diabetes	rs6059988	20	33278101	C	-1.98e-05	0.90543	0.451487	0.5314	0.994957	0.997
type 2 diabetes	rs13040777	20	33286908	A	-1.9381e-05	0.90741	0.451862	0.5836	0.995132	0.997
type 2 diabetes	rs647515	20	33727050	G	-2.1678e-05	0.90842	0.262274	0.5337	0.996569	0.997
type 2 diabetes	rs55829662	20	33731625	C	2.1613e-05	0.90854	0.26254	0.5036	0.999375	1
type 2 diabetes	rs1015363	20	32738335	A	1.8847e-05	0.9099	0.465308	0.2703	0.993051	1
type 2 diabetes	rs9789792	20	32957709	A	1.8494e-05	0.91109	0.491184	0.9973	0.999312	1
type 2 diabetes	rs4911456	20	33573500	A	1.9954e-05	0.91141	0.308205	0.299	0.998642	1
type 2 diabetes	rs6088532	20	33178782	G	1.9213e-05	0.91279	0.338444	0.36	0.994994	1
type 2 diabetes	rs2425007	20	33572941	G	1.9247e-05	0.91453	0.30812	0.2844	0.999438	1
type 2 diabetes	rs6058105	20	33271719	T	-1.7839e-05	0.91471	0.451579	0.6666	0.996566	0.997
type 2 diabetes	rs6087657	20	33564689	A	-1.7763e-05	0.92109	0.308068	0.2808	0.999952	0.997
type 2 diabetes	rs1205347	20	32912050	T	-1.6151e-05	0.92245	0.492749	0.7021	0.996221	0.997
type 2 diabetes	rs1205341	20	32923476	C	1.5965e-05	0.92329	0.489973	0.9238	0.997114	1
type 2 diabetes	rs6087580	20	32992592	G	1.5946e-05	0.92333	0.490618	0.932	0.998595	1
type 2 diabetes	rs6088498	20	33020446	G	-1.5598e-05	0.925	0.490737	0.8914	0.998696	0.998
type 2 diabetes	rs3746455	20	32957216	A	1.519e-05	0.92693	0.490568	0.97	0.999649	1
type 2 diabetes	rs7271144	20	32948885	C	-1.5025e-05	0.92775	0.492616	0.6997	0.998958	0.998
type 2 diabetes	rs1885115	20	33681256	A	-1.5698e-05	0.92965	0.31899	0.3152	0.998066	0.998
type 2 diabetes	rs4911152	20	32955024	C	1.3799e-05	0.93361	0.490587	0.9918	0.999401	1
type 2 diabetes	rs6059824	20	33014543	C	1.376e-05	0.93381	0.493768	0.6871	0.999819	1
type 2 diabetes	rs7361656	20	33729147	G	1.5503e-05	0.93439	0.262433	0.4814	0.997747	1
type 2 diabetes	rs6059774	20	32935192	G	1.3563e-05	0.93477	0.48969	0.9292	0.998194	1
type 2 diabetes	rs6060001	20	33294353	G	1.3324e-05	0.93626	0.445114	0.4011	0.998579	1
type 2 diabetes	rs6088529	20	33170752	A	1.4034e-05	0.93641	0.335122	0.3556	0.994958	1
type 2 diabetes	rs2378135	20	32962926	C	1.3208e-05	0.93644	0.491075	0.9673	0.999643	1
type 2 diabetes	rs6142297	20	33687584	G	1.3008e-05	0.93865	0.403306	0.6808	0.997299	1
type 2 diabetes	rs6059827	20	33016358	A	-1.2698e-05	0.93889	0.49117	0.932	0.999636	0.998
type 2 diabetes	rs6141482	20	33156523	C	1.3328e-05	0.9396	0.335141	0.3656	0.99481	1
type 2 diabetes	rs633784	20	33726323	G	-1.4252e-05	0.93968	0.262774	0.5428	0.996112	0.998
type 2 diabetes	rs4911421	20	32998948	C	1.2483e-05	0.93993	0.491019	0.9673	0.999317	1
type 2 diabetes	rs6060137	20	33565480	C	1.3429e-05	0.94038	0.3084	0.08142	genotyped	1
type 2 diabetes	rs3761147	20	32996689	T	1.2291e-05	0.94085	0.491012	0.9728	0.999307	1
type 2 diabetes	rs4911420	20	32998654	C	1.2267e-05	0.94097	0.491168	0.9728	0.999074	1
type 2 diabetes	rs4911419	20	32995873	A	1.226e-05	0.941	0.49101	0.9728	0.999357	1
type 2 diabetes	rs6088489	20	32997945	G	1.226e-05	0.941	0.49101	0.9728	0.99935	1
type 2 diabetes	rs6579165	20	32994715	G	1.226e-05	0.94101	0.491012	0.97	0.999319	1
type 2 diabetes	rs4911418	20	32994257	A	1.225e-05	0.94105	0.49101	0.9728	0.999318	1
type 2 diabetes	rs6059834	20	33019299	G	-1.2241e-05	0.94109	0.49117	0.9293	0.999561	0.998
type 2 diabetes	rs8125522	20	32992324	C	1.2218e-05	0.94121	0.491167	0.9728	0.999027	1
type 2 diabetes	rs6579161	20	32948784	C	1.2083e-05	0.94185	0.490003	0.9293	0.999568	1
type 2 diabetes	rs4911422	20	32999345	C	1.2075e-05	0.94189	0.491014	0.9728	0.99932	1
type 2 diabetes	rs6059779	20	32950325	T	1.201e-05	0.94221	0.489956	0.932	0.999373	1
type 2 diabetes	rs6120645	20	33025171	T	-1.1971e-05	0.94239	0.49114	0.9293	0.999653	0.998
type 2 diabetes	rs6088488	20	32992631	C	1.196e-05	0.94244	0.490998	0.9728	0.999448	1
type 2 diabetes	rs6059840	20	33030405	A	-1.1899e-05	0.94273	0.491157	0.9293	0.999638	0.998
type 2 diabetes	rs6087574	20	32948753	C	1.187e-05	0.94288	0.489982	0.9265	0.999477	1
type 2 diabetes	rs6059829	20	33017074	A	-1.1812e-05	0.94315	0.49113	0.9374	0.999646	0.998
type 2 diabetes	rs6120644	20	33023810	A	-1.1782e-05	0.94329	0.491143	0.9293	0.999583	0.998
type 2 diabetes	rs4277599	20	33008905	C	1.1719e-05	0.94359	0.491297	0.97	0.999428	1
type 2 diabetes	rs2889850	20	33010647	C	1.1707e-05	0.94365	0.49114	0.9673	0.999639	1
type 2 diabetes	rs2225837	20	33005634	T	1.159e-05	0.94422	0.491123	0.9619	0.999566	1
type 2 diabetes	rs6141486	20	33178132	A	1.2254e-05	0.94443	0.335557	0.3865	0.994682	1
type 2 diabetes	rs6088483	20	32984714	A	1.1501e-05	0.94464	0.491274	0.9646	0.999341	1
type 2 diabetes	rs6088484	20	32985961	C	1.1497e-05	0.94466	0.49128	0.9646	0.999353	1
type 2 diabetes	rs6142285	20	33643640	G	1.1839e-05	0.94508	0.381515	0.3016	0.982933	1
type 2 diabetes	rs6141469	20	33004002	C	1.141e-05	0.94508	0.491144	0.9619	0.999588	1
type 2 diabetes	rs945674	20	32964247	C	1.1364e-05	0.9453	0.491104	0.9564	0.999557	1
type 2 diabetes	rs4911417	20	32970606	G	1.1344e-05	0.9454	0.491268	0.9619	0.999429	1
type 2 diabetes	rs7264012	20	33191027	C	1.1985e-05	0.94545	0.338674	0.3747	0.99775	1
type 2 diabetes	rs6088478	20	32971719	C	1.1309e-05	0.94556	0.491266	0.9619	0.999426	1
type 2 diabetes	rs2424992	20	33012060	T	-1.1281e-05	0.94571	0.491057	0.9428	0.999344	0.998
type 2 diabetes	rs6119497	20	33012529	A	-1.1269e-05	0.94576	0.49108	0.9428	0.999389	0.998
type 2 diabetes	rs6058029	20	32969643	C	1.1102e-05	0.94656	0.49111	0.9619	0.999764	1
type 2 diabetes	rs6059797	20	32971424	A	1.11e-05	0.94657	0.49111	0.9619	0.99977	1
type 2 diabetes	rs6088479	20	32971736	C	1.108e-05	0.94666	0.49111	0.9646	0.999768	1
type 2 diabetes	rs2184836	20	32963369	G	1.1047e-05	0.94682	0.49109	0.9564	0.999673	1
type 2 diabetes	rs4911423	20	32999386	A	1.1015e-05	0.94699	0.491075	0.9946	0.998994	1
type 2 diabetes	rs6058040	20	33013751	G	-1.1004e-05	0.94704	0.491266	0.9483	0.999265	0.998
type 2 diabetes	rs6088715	20	33700468	A	1.0675e-05	0.94962	0.40333	0.6269	0.997953	1
type 2 diabetes	rs6141471	20	33006730	G	1.0464e-05	0.94963	0.491204	0.9918	0.999348	1
type 2 diabetes	rs6088716	20	33700499	T	1.0672e-05	0.94964	0.403316	0.6294	0.997875	1
type 2 diabetes	rs6142298	20	33688417	G	1.0277e-05	0.95155	0.403272	0.6833	0.996253	1
type 2 diabetes	rs6087579	20	32985155	G	9.5021e-06	0.95425	0.491304	0.9592	0.999044	1
type 2 diabetes	rs721613	20	33193428	G	1.0044e-05	0.95427	0.33877	0.3566	0.997702	1
type 2 diabetes	rs3736762	20	33037336	T	-9.3778e-06	0.95485	0.491076	0.9157	0.999607	0.999
type 2 diabetes	rs6058051	20	33044862	A	-9.134e-06	0.95602	0.49102	0.9483	0.999732	0.999
type 2 diabetes	rs6059855	20	33057328	G	-8.7975e-06	0.95764	0.491024	0.9592	0.999687	0.999
type 2 diabetes	rs6120650	20	33039973	A	-8.7788e-06	0.95773	0.491021	0.9293	0.999731	0.999
type 2 diabetes	rs6087587	20	33058628	T	-8.7538e-06	0.95785	0.49102	0.9592	0.999696	0.999
type 2 diabetes	rs6059861	20	33068563	T	-8.5556e-06	0.95881	0.491115	1	0.999255	0.999
type 2 diabetes	rs6059850	20	33044784	G	-8.3826e-06	0.95963	0.491017	0.9592	0.999657	0.999
type 2 diabetes	rs6142208	20	33220263	T	8.8661e-06	0.95967	0.336426	0.4424	0.999849	1
type 2 diabetes	rs6059845	20	33036500	A	-8.3248e-06	0.95992	0.491197	0.9211	0.999535	0.999
type 2 diabetes	rs6059851	20	33047945	A	-8.1007e-06	0.96099	0.491168	0.9564	0.999511	0.999
type 2 diabetes	rs1040747	20	33145832	G	8.499e-06	0.96149	0.334606	0.4131	0.993414	1
type 2 diabetes	rs6087606	20	33194426	C	8.3579e-06	0.96194	0.338843	0.3626	0.997924	1
type 2 diabetes	rs1890002	20	32919219	G	7.1908e-06	0.96542	0.489472	0.9021	0.996555	1
type 2 diabetes	rs6088524	20	33139384	C	7.3604e-06	0.96666	0.334521	0.3957	0.992866	1
type 2 diabetes	rs6141493	20	33218649	G	7.1063e-06	0.96766	0.336962	0.427	0.998513	1
type 2 diabetes	rs6088548	20	33215745	C	6.8915e-06	0.96864	0.337108	0.4382	0.99865	1
type 2 diabetes	rs6087609	20	33214541	C	6.8406e-06	0.96887	0.337112	0.4315	0.998782	1
type 2 diabetes	rs6088508	20	33060081	G	-6.0046e-06	0.97108	0.491155	0.9973	0.998882	0.999
type 2 diabetes	rs2295887	20	33714187	A	6.0034e-06	0.97163	0.403111	0.5851	0.999858	1
type 2 diabetes	rs6142302	20	33713251	G	5.8746e-06	0.97224	0.403102	0.5754	0.999922	1
type 2 diabetes	rs6142301	20	33712148	C	5.8248e-06	0.97248	0.403098	0.5778	0.999902	1
type 2 diabetes	rs6141535	20	33715067	A	5.7479e-06	0.97287	0.403071	0.5949	0.997583	1
type 2 diabetes	rs1989395	20	33707989	T	5.6295e-06	0.97341	0.403123	0.5658	0.999415	1
type 2 diabetes	rs2378205	20	33110803	G	-5.462e-06	0.97369	0.491099	0.9946	0.999447	0.999
type 2 diabetes	rs13044899	20	33287078	A	5.152e-06	0.9755	0.436485	0.7021	0.988654	1
type 2 diabetes	rs2378204	20	33067904	G	-4.9269e-06	0.97627	0.491039	0.9864	0.999595	0.999
type 2 diabetes	rs6058057	20	33065283	A	-4.8718e-06	0.97653	0.491033	0.9918	0.999619	0.999
type 2 diabetes	rs6142299	20	33704888	C	4.8142e-06	0.97727	0.402794	0.5899	0.998158	1
type 2 diabetes	rs6087677	20	33714805	C	4.7636e-06	0.97751	0.403014	0.6047	0.998278	1
type 2 diabetes	rs2065111	20	33708637	C	4.7298e-06	0.97766	0.40305	0.5705	0.999275	1
type 2 diabetes	rs6058059	20	33070159	T	-4.3713e-06	0.97894	0.491029	0.9782	0.999648	0.999
type 2 diabetes	rs6059872	20	33082775	A	-4.3066e-06	0.97926	0.491021	0.9782	0.999666	0.999
type 2 diabetes	rs2378333	20	33708890	G	4.2515e-06	0.97992	0.403104	0.5681	0.998642	1
type 2 diabetes	rs6059905	20	33126946	C	-3.8462e-06	0.98151	0.490892	0.9536	0.995855	0.999
type 2 diabetes	rs6088725	20	33713040	A	3.6854e-06	0.98259	0.402799	0.535	0.999271	1
type 2 diabetes	rs11904852	20	33216764	A	3.6674e-06	0.98331	0.336671	0.4679	0.998417	1
type 2 diabetes	rs6059882	20	33090167	C	-2.8972e-06	0.98604	0.491235	0.9782	0.999155	1
type 2 diabetes	rs6059887	20	33101102	G	-2.889e-06	0.98608	0.490931	0.9918	0.999283	1
type 2 diabetes	rs6058073	20	33116483	C	-2.8861e-06	0.9861	0.491039	0.9809	0.999085	1
type 2 diabetes	rs6088543	20	33206191	T	3.0363e-06	0.98618	0.337149	0.436	0.998476	1
type 2 diabetes	rs6059892	20	33105766	G	-2.8532e-06	0.98626	0.491039	0.9973	0.999384	1
type 2 diabetes	rs6059890	20	33101653	C	-2.8309e-06	0.98636	0.491187	0.9946	0.999217	1
type 2 diabetes	rs6120666	20	33090718	G	-2.7862e-06	0.98658	0.490966	0.9946	0.999296	1
type 2 diabetes	rs6120668	20	33099793	G	-2.7749e-06	0.98664	0.490914	1	0.998964	1
type 2 diabetes	rs6579178	20	33203552	A	2.9281e-06	0.98667	0.337076	0.436	0.99827	1
type 2 diabetes	rs6087592	20	33114503	G	-2.7474e-06	0.98677	0.491153	0.9946	0.998486	1
type 2 diabetes	rs6088721	20	33706011	C	2.7428e-06	0.98704	0.402847	0.6072	0.998457	1
type 2 diabetes	rs6088542	20	33204410	T	2.5405e-06	0.98844	0.337084	0.436	0.998624	1
type 2 diabetes	rs6088726	20	33713055	G	-2.2427e-06	0.98941	0.402398	0.5537	0.998802	1
type 2 diabetes	rs6058094	20	33224174	T	-1.9731e-06	0.99054	0.45053	0.7301	0.998671	1
type 2 diabetes	rs6088727	20	33713639	A	1.7828e-06	0.9916	0.4044	0.03792	genotyped	1
type 2 diabetes	rs2065109	20	33707135	C	7.4186e-07	0.9965	0.402741	0.5826	0.998703	1
type 2 diabetes	rs927442	20	33708871	G	-7.3653e-07	0.99652	0.40272	0.5802	0.998185	1
type 2 diabetes	rs2273805	20	33706575	A	6.3254e-07	0.99701	0.40274	0.5826	0.998656	1
type 2 diabetes	rs6088723	20	33709279	C	-6.1284e-07	0.9971	0.402672	0.5899	0.998969	1
type 2 diabetes	rs6088547	20	33212947	A	-4.4807e-07	0.99796	0.337024	0.4337	0.998357	1
type 2 diabetes	rs6088724	20	33712915	T	-3.6663e-07	0.99827	0.40267	0.5948	0.999298	1
type 2 diabetes	rs6579219	20	33711391	G	-2.7671e-07	0.99869	0.402684	0.6022	0.999139	1
type 2 diabetes	rs2016438	20	33708023	G	-2.6758e-07	0.99874	0.402705	0.5802	0.998823	1
type 2 diabetes	rs6087577	20	32955423	G	2.4515e-07	0.99882	0.4897	0.06474	genotyped	1
type 2 diabetes	rs6088728	20	33713674	C	2.3288e-07	0.9989	0.402668	0.5948	0.999368	1
type 2 diabetes	rs2065108	20	33706822	T	2.0995e-07	0.99901	0.40272	0.585	0.99876	1
type 2 diabetes	rs6120838	20	33711624	A	-5.0116e-08	0.99976	0.402679	0.5973	0.999268	1
