# Supplementary material for: The Link between Type 2 Diabetes Mellitus and the Polymorphisms of Glutathione-Metabolizing Genes Suggests a New Hypothesis Explaining Disease Initiation and Progression
Source: Life (Basel). 2021 Aug 28;11(9):886. doi: 10.3390/life11090886 (PMC8466482; doi:10.3390/life11090886)
Supplement: Supplementary file 1 [file life-11-00886-s001.zip › Suppl Table S5.xls]

## Sheet: File description
		Supplementary table 5
		QTL analysis using GTEx (https://www.gtexportal.org/home/)
list 1	File description
list 2	rs13041792-eQTL		Expression quantitative trait loci for SNP rs13041792
list 3	rs1801310-eQTL		Expression quantitative trait loci for SNP rs1801310
list 4	rs6088660-eQTL		Expression quantitative trait loci for SNP rs6088660
list 5	rs6119534-eQTL		Expression quantitative trait loci for SNP rs6119534
list 6	rs11546155-eQTL		Expression quantitative trait loci for SNP rs11546155
list 7	rs13041792-sQTL		Splicing quantitative trait loci for SNP rs13041792
list 8	rs1801310-sQTL		Splicing quantitative trait loci for SNP rs1801310
list 9	rs6088660-sQTL		Splicing quantitative trait loci for SNP rs6088660
list 10	rs6119534-sQTL		Splicing quantitative trait loci for SNP rs6119534
list 11	rs11546155-sQTL		Splicing quantitative trait loci for SNP rs11546155
	*QTLs in the pancreas are highlighted by yellow

## Sheet: rs13041792-eQTL
Gencode Id	Gene Symbol	Variant Id	SNP Id	P-Value	NES	Tissue
ENSG00000101000.5	PROCR	chr20_34957252_G_A_b38	rs13041792	2.8e-26	-0.4	Adipose - Subcutaneous
ENSG00000088298.12	EDEM2	chr20_34957252_G_A_b38	rs13041792	2.3e-15	-0.24	Adipose - Subcutaneous
ENSG00000101460.12	MAP1LC3A	chr20_34957252_G_A_b38	rs13041792	9.2e-12	0.23	Adipose - Subcutaneous
ENSG00000078814.15	MYH7B	chr20_34957252_G_A_b38	rs13041792	2.6e-09	0.22	Adipose - Subcutaneous
ENSG00000100991.11	TRPC4AP	chr20_34957252_G_A_b38	rs13041792	5.6e-06	-0.17	Adipose - Subcutaneous
ENSG00000101460.12	MAP1LC3A	chr20_34957252_G_A_b38	rs13041792	9.9e-14	0.25	Adipose - Visceral (Omentum)
ENSG00000078814.15	MYH7B	chr20_34957252_G_A_b38	rs13041792	6.3e-08	0.21	Adipose - Visceral (Omentum)
ENSG00000088298.12	EDEM2	chr20_34957252_G_A_b38	rs13041792	6e-06	-0.16	Adipose - Visceral (Omentum)
ENSG00000100991.11	TRPC4AP	chr20_34957252_G_A_b38	rs13041792	0.00032	-0.13	Adipose - Visceral (Omentum)
ENSG00000088298.12	EDEM2	chr20_34957252_G_A_b38	rs13041792	6.9e-06	-0.26	Adrenal Gland
ENSG00000214078.12	CPNE1	chr20_34957252_G_A_b38	rs13041792	5.1e-05	-0.36	Adrenal Gland
ENSG00000078814.15	MYH7B	chr20_34957252_G_A_b38	rs13041792	5.2e-17	0.34	Artery - Aorta
ENSG00000088298.12	EDEM2	chr20_34957252_G_A_b38	rs13041792	1.4e-12	-0.27	Artery - Aorta
ENSG00000101000.5	PROCR	chr20_34957252_G_A_b38	rs13041792	1e-07	-0.28	Artery - Aorta
ENSG00000101460.12	MAP1LC3A	chr20_34957252_G_A_b38	rs13041792	8.2e-07	0.2	Artery - Aorta
ENSG00000078814.15	MYH7B	chr20_34957252_G_A_b38	rs13041792	5.4e-05	0.24	Artery - Coronary
ENSG00000088298.12	EDEM2	chr20_34957252_G_A_b38	rs13041792	2.9e-23	-0.29	Artery - Tibial
ENSG00000078814.15	MYH7B	chr20_34957252_G_A_b38	rs13041792	1e-20	0.29	Artery - Tibial
ENSG00000101000.5	PROCR	chr20_34957252_G_A_b38	rs13041792	2.3e-12	-0.22	Artery - Tibial
ENSG00000101460.12	MAP1LC3A	chr20_34957252_G_A_b38	rs13041792	2.2e-08	0.14	Artery - Tibial
ENSG00000126005.16	MMP24-AS1	chr20_34957252_G_A_b38	rs13041792	4.2e-06	-0.38	Brain - Amygdala
ENSG00000088298.12	EDEM2	chr20_34957252_G_A_b38	rs13041792	6.1e-05	-0.37	Brain - Amygdala
ENSG00000088298.12	EDEM2	chr20_34957252_G_A_b38	rs13041792	2.6e-05	-0.36	Brain - Anterior cingulate cortex (BA24)
ENSG00000088298.12	EDEM2	chr20_34957252_G_A_b38	rs13041792	6.7e-06	-0.29	Brain - Caudate (basal ganglia)
ENSG00000131069.19	ACSS2	chr20_34957252_G_A_b38	rs13041792	6.7e-05	0.23	Brain - Caudate (basal ganglia)
ENSG00000101460.12	MAP1LC3A	chr20_34957252_G_A_b38	rs13041792	0.00013	0.17	Brain - Caudate (basal ganglia)
ENSG00000078814.15	MYH7B	chr20_34957252_G_A_b38	rs13041792	1.4e-11	0.54	Brain - Cerebellar Hemisphere
ENSG00000101460.12	MAP1LC3A	chr20_34957252_G_A_b38	rs13041792	3.8e-06	0.25	Brain - Cerebellar Hemisphere
ENSG00000131069.19	ACSS2	chr20_34957252_G_A_b38	rs13041792	4.5e-05	0.25	Brain - Cerebellar Hemisphere
ENSG00000078814.15	MYH7B	chr20_34957252_G_A_b38	rs13041792	3.8e-17	0.61	Brain - Cerebellum
ENSG00000101460.12	MAP1LC3A	chr20_34957252_G_A_b38	rs13041792	1.9e-08	0.34	Brain - Cerebellum
ENSG00000131069.19	ACSS2	chr20_34957252_G_A_b38	rs13041792	5.9e-05	0.26	Brain - Cerebellum
ENSG00000088298.12	EDEM2	chr20_34957252_G_A_b38	rs13041792	1.4e-09	-0.41	Brain - Cortex
ENSG00000088298.12	EDEM2	chr20_34957252_G_A_b38	rs13041792	2.3e-05	-0.38	Brain - Frontal Cortex (BA9)
ENSG00000088298.12	EDEM2	chr20_34957252_G_A_b38	rs13041792	4.6e-06	-0.38	Brain - Hypothalamus
ENSG00000088298.12	EDEM2	chr20_34957252_G_A_b38	rs13041792	4.4e-06	-0.32	Brain - Nucleus accumbens (basal ganglia)
ENSG00000088298.12	EDEM2	chr20_34957252_G_A_b38	rs13041792	4.3e-06	-0.34	Brain - Putamen (basal ganglia)
ENSG00000101000.5	PROCR	chr20_34957252_G_A_b38	rs13041792	9e-07	-0.16	Breast - Mammary Tissue
ENSG00000088298.12	EDEM2	chr20_34957252_G_A_b38	rs13041792	1.3e-06	-0.18	Breast - Mammary Tissue
ENSG00000101460.12	MAP1LC3A	chr20_34957252_G_A_b38	rs13041792	5.7e-06	0.16	Breast - Mammary Tissue
ENSG00000078814.15	MYH7B	chr20_34957252_G_A_b38	rs13041792	2.6e-05	0.2	Breast - Mammary Tissue
ENSG00000088298.12	EDEM2	chr20_34957252_G_A_b38	rs13041792	9e-09	-0.24	Cells - Cultured fibroblasts
ENSG00000078814.15	MYH7B	chr20_34957252_G_A_b38	rs13041792	2.1e-08	0.22	Cells - Cultured fibroblasts
ENSG00000100991.11	TRPC4AP	chr20_34957252_G_A_b38	rs13041792	8.4e-08	-0.15	Cells - Cultured fibroblasts
ENSG00000101019.21	UQCC1	chr20_34957252_G_A_b38	rs13041792	8.6e-06	-0.2	Cells - Cultured fibroblasts
ENSG00000101000.5	PROCR	chr20_34957252_G_A_b38	rs13041792	0.00039	0.13	Cells - Cultured fibroblasts
ENSG00000088298.12	EDEM2	chr20_34957252_G_A_b38	rs13041792	6.7e-10	-0.29	Colon - Sigmoid
ENSG00000078814.15	MYH7B	chr20_34957252_G_A_b38	rs13041792	6.1e-07	0.2	Colon - Sigmoid
ENSG00000101460.12	MAP1LC3A	chr20_34957252_G_A_b38	rs13041792	1.3e-05	0.19	Colon - Sigmoid
ENSG00000100991.11	TRPC4AP	chr20_34957252_G_A_b38	rs13041792	4.5e-05	-0.17	Colon - Sigmoid
ENSG00000078814.15	MYH7B	chr20_34957252_G_A_b38	rs13041792	1.9e-06	0.23	Colon - Transverse
ENSG00000100991.11	TRPC4AP	chr20_34957252_G_A_b38	rs13041792	2.8e-05	-0.12	Colon - Transverse
ENSG00000101460.12	MAP1LC3A	chr20_34957252_G_A_b38	rs13041792	9.5e-05	0.15	Colon - Transverse
ENSG00000088298.12	EDEM2	chr20_34957252_G_A_b38	rs13041792	6.7e-11	-0.25	Esophagus - Gastroesophageal Junction
ENSG00000078814.15	MYH7B	chr20_34957252_G_A_b38	rs13041792	2.1e-06	0.18	Esophagus - Gastroesophageal Junction
ENSG00000100991.11	TRPC4AP	chr20_34957252_G_A_b38	rs13041792	0.00014	-0.17	Esophagus - Gastroesophageal Junction
ENSG00000100991.11	TRPC4AP	chr20_34957252_G_A_b38	rs13041792	1.5e-11	-0.22	Esophagus - Mucosa
ENSG00000078814.15	MYH7B	chr20_34957252_G_A_b38	rs13041792	1.8e-08	0.22	Esophagus - Mucosa
ENSG00000088298.12	EDEM2	chr20_34957252_G_A_b38	rs13041792	5.6e-05	-0.17	Esophagus - Mucosa
ENSG00000125998.7	FAM83C	chr20_34957252_G_A_b38	rs13041792	0.00014	-0.13	Esophagus - Mucosa
ENSG00000100991.11	TRPC4AP	chr20_34957252_G_A_b38	rs13041792	2.6e-10	-0.2	Esophagus - Muscularis
ENSG00000078814.15	MYH7B	chr20_34957252_G_A_b38	rs13041792	2.8e-10	0.21	Esophagus - Muscularis
ENSG00000088298.12	EDEM2	chr20_34957252_G_A_b38	rs13041792	2e-08	-0.19	Esophagus - Muscularis
ENSG00000101460.12	MAP1LC3A	chr20_34957252_G_A_b38	rs13041792	4.2e-07	0.17	Esophagus - Muscularis
ENSG00000088298.12	EDEM2	chr20_34957252_G_A_b38	rs13041792	4.2e-14	-0.32	Heart - Atrial Appendage
ENSG00000100991.11	TRPC4AP	chr20_34957252_G_A_b38	rs13041792	1.6e-05	-0.18	Heart - Atrial Appendage
ENSG00000088298.12	EDEM2	chr20_34957252_G_A_b38	rs13041792	2.6e-14	-0.28	Heart - Left Ventricle
ENSG00000101000.5	PROCR	chr20_34957252_G_A_b38	rs13041792	2.8e-09	-0.33	Heart - Left Ventricle
ENSG00000100983.9	GSS	chr20_34957252_G_A_b38	rs13041792	0.00026	-0.16	Heart - Left Ventricle
ENSG00000101000.5	PROCR	chr20_34957252_G_A_b38	rs13041792	1.1e-06	0.36	Liver
ENSG00000100991.11	TRPC4AP	chr20_34957252_G_A_b38	rs13041792	1.1e-05	-0.3	Liver
ENSG00000078814.15	MYH7B	chr20_34957252_G_A_b38	rs13041792	4.5e-05	0.17	Liver
ENSG00000078814.15	MYH7B	chr20_34957252_G_A_b38	rs13041792	1.2e-13	0.22	Lung
ENSG00000100991.11	TRPC4AP	chr20_34957252_G_A_b38	rs13041792	3.9e-10	-0.15	Lung
ENSG00000101019.21	UQCC1	chr20_34957252_G_A_b38	rs13041792	1.3e-05	-0.17	Lung
ENSG00000101460.12	MAP1LC3A	chr20_34957252_G_A_b38	rs13041792	0.00031	0.09	Lung
ENSG00000088298.12	EDEM2	chr20_34957252_G_A_b38	rs13041792	1.2e-14	-0.19	Muscle - Skeletal
ENSG00000101000.5	PROCR	chr20_34957252_G_A_b38	rs13041792	2.5e-12	-0.27	Muscle - Skeletal
ENSG00000131067.16	GGT7	chr20_34957252_G_A_b38	rs13041792	7.5e-10	0.23	Muscle - Skeletal
ENSG00000244005.12	NFS1	chr20_34957252_G_A_b38	rs13041792	0.00025	0.11	Muscle - Skeletal
ENSG00000078814.15	MYH7B	chr20_34957252_G_A_b38	rs13041792	4.2e-24	0.25	Nerve - Tibial
ENSG00000088298.12	EDEM2	chr20_34957252_G_A_b38	rs13041792	1.4e-23	-0.31	Nerve - Tibial
ENSG00000101000.5	PROCR	chr20_34957252_G_A_b38	rs13041792	5.5e-11	-0.23	Nerve - Tibial
ENSG00000131069.19	ACSS2	chr20_34957252_G_A_b38	rs13041792	3.2e-07	0.21	Nerve - Tibial
ENSG00000101460.12	MAP1LC3A	chr20_34957252_G_A_b38	rs13041792	1.5e-06	0.16	Nerve - Tibial
ENSG00000100991.11	TRPC4AP	chr20_34957252_G_A_b38	rs13041792	0.00052	-0.11	Nerve - Tibial
ENSG00000088298.12	EDEM2	chr20_34957252_G_A_b38	rs13041792	7.3e-06	-0.3	Ovary
ENSG00000078814.15	MYH7B	chr20_34957252_G_A_b38	rs13041792	2e-05	0.23	Ovary
ENSG00000088298.12	EDEM2	chr20_34957252_G_A_b38	rs13041792	1.3e-18	0.48	Pancreas
ENSG00000101000.5	PROCR	chr20_34957252_G_A_b38	rs13041792	2.8e-10	0.61	Pancreas
ENSG00000078814.15	MYH7B	chr20_34957252_G_A_b38	rs13041792	4.4e-08	0.31	Pancreas
ENSG00000088298.12	EDEM2	chr20_34957252_G_A_b38	rs13041792	3.3e-05	-0.22	Pituitary
ENSG00000101460.12	MAP1LC3A	chr20_34957252_G_A_b38	rs13041792	0.00019	0.22	Pituitary
ENSG00000078814.15	MYH7B	chr20_34957252_G_A_b38	rs13041792	4.7e-09	0.25	Skin - Not Sun Exposed (Suprapubic)
ENSG00000088298.12	EDEM2	chr20_34957252_G_A_b38	rs13041792	5e-08	-0.25	Skin - Not Sun Exposed (Suprapubic)
ENSG00000100991.11	TRPC4AP	chr20_34957252_G_A_b38	rs13041792	3.8e-06	-0.13	Skin - Not Sun Exposed (Suprapubic)
ENSG00000125998.7	FAM83C	chr20_34957252_G_A_b38	rs13041792	1.4e-05	-0.13	Skin - Not Sun Exposed (Suprapubic)
ENSG00000101000.5	PROCR	chr20_34957252_G_A_b38	rs13041792	2.7e-05	-0.17	Skin - Not Sun Exposed (Suprapubic)
ENSG00000101000.5	PROCR	chr20_34957252_G_A_b38	rs13041792	3.9e-15	-0.3	Skin - Sun Exposed (Lower leg)
ENSG00000078814.15	MYH7B	chr20_34957252_G_A_b38	rs13041792	8e-07	0.19	Skin - Sun Exposed (Lower leg)
ENSG00000100991.11	TRPC4AP	chr20_34957252_G_A_b38	rs13041792	5e-06	-0.13	Skin - Sun Exposed (Lower leg)
ENSG00000088298.12	EDEM2	chr20_34957252_G_A_b38	rs13041792	6.9e-06	-0.18	Skin - Sun Exposed (Lower leg)
ENSG00000131067.16	GGT7	chr20_34957252_G_A_b38	rs13041792	3.5e-05	-0.16	Skin - Sun Exposed (Lower leg)
ENSG00000125998.7	FAM83C	chr20_34957252_G_A_b38	rs13041792	0.00026	-0.092	Skin - Sun Exposed (Lower leg)
ENSG00000078814.15	MYH7B	chr20_34957252_G_A_b38	rs13041792	4.8e-09	0.48	Small Intestine - Terminal Ileum
ENSG00000101000.5	PROCR	chr20_34957252_G_A_b38	rs13041792	9.5e-12	0.62	Spleen
ENSG00000078814.15	MYH7B	chr20_34957252_G_A_b38	rs13041792	1e-07	0.33	Spleen
ENSG00000088298.12	EDEM2	chr20_34957252_G_A_b38	rs13041792	3.5e-05	-0.18	Stomach
ENSG00000078814.15	MYH7B	chr20_34957252_G_A_b38	rs13041792	8.1e-05	0.18	Stomach
ENSG00000101460.12	MAP1LC3A	chr20_34957252_G_A_b38	rs13041792	0.0001	0.18	Stomach
ENSG00000088298.12	EDEM2	chr20_34957252_G_A_b38	rs13041792	5.6e-06	-0.22	Testis
ENSG00000101464.10	PIGU	chr20_34957252_G_A_b38	rs13041792	5.6e-06	0.33	Testis
ENSG00000088298.12	EDEM2	chr20_34957252_G_A_b38	rs13041792	9.8e-16	-0.27	Thyroid
ENSG00000078814.15	MYH7B	chr20_34957252_G_A_b38	rs13041792	1.6e-15	0.21	Thyroid
ENSG00000100991.11	TRPC4AP	chr20_34957252_G_A_b38	rs13041792	5.5e-12	-0.17	Thyroid
ENSG00000101460.12	MAP1LC3A	chr20_34957252_G_A_b38	rs13041792	1.5e-09	0.2	Thyroid
ENSG00000101000.5	PROCR	chr20_34957252_G_A_b38	rs13041792	1.2e-06	-0.18	Thyroid
ENSG00000276073.1	RP5-1125A11.7	chr20_34957252_G_A_b38	rs13041792	0.00023	-0.17	Thyroid
ENSG00000088298.12	EDEM2	chr20_34957252_G_A_b38	rs13041792	5.6e-08	-0.1	Whole Blood
ENSG00000078814.15	MYH7B	chr20_34957252_G_A_b38	rs13041792	6.3e-06	0.21	Whole Blood
ENSG00000101460.12	MAP1LC3A	chr20_34957252_G_A_b38	rs13041792	7.6e-05	0.11	Whole Blood

## Sheet: rs1801310-eQTL
Gencode Id	Gene Symbol	Variant Id	SNP Id	P-Value	NES	Tissue
ENSG00000101460.12	MAP1LC3A	chr20_34929211_A_G_b38	rs1801310	8.4e-08	0.15	Adipose - Subcutaneous
ENSG00000101000.5	PROCR	chr20_34929211_A_G_b38	rs1801310	0.00017	-0.13	Adipose - Subcutaneous
ENSG00000101460.12	MAP1LC3A	chr20_34929211_A_G_b38	rs1801310	3.3e-08	0.16	Adipose - Visceral (Omentum)
ENSG00000131067.16	GGT7	chr20_34929211_A_G_b38	rs1801310	0.00025	-0.092	Adipose - Visceral (Omentum)
ENSG00000101460.12	MAP1LC3A	chr20_34929211_A_G_b38	rs1801310	8.5e-07	0.17	Artery - Aorta
ENSG00000101460.12	MAP1LC3A	chr20_34929211_A_G_b38	rs1801310	2.6e-15	0.16	Artery - Tibial
ENSG00000198646.13	NCOA6	chr20_34929211_A_G_b38	rs1801310	8.1e-11	0.13	Artery - Tibial
ENSG00000101464.10	PIGU	chr20_34929211_A_G_b38	rs1801310	4e-07	0.14	Artery - Tibial
ENSG00000100983.9	GSS	chr20_34929211_A_G_b38	rs1801310	0.0002	0.1	Artery - Tibial
ENSG00000101460.12	MAP1LC3A	chr20_34929211_A_G_b38	rs1801310	2e-05	0.19	Brain - Anterior cingulate cortex (BA24)
ENSG00000131069.19	ACSS2	chr20_34929211_A_G_b38	rs1801310	1.3e-13	0.34	Brain - Caudate (basal ganglia)
ENSG00000101460.12	MAP1LC3A	chr20_34929211_A_G_b38	rs1801310	4.4e-05	0.15	Brain - Caudate (basal ganglia)
ENSG00000131069.19	ACSS2	chr20_34929211_A_G_b38	rs1801310	1.6e-10	0.33	Brain - Cerebellar Hemisphere
ENSG00000101460.12	MAP1LC3A	chr20_34929211_A_G_b38	rs1801310	2.4e-08	0.26	Brain - Cerebellar Hemisphere
ENSG00000131069.19	ACSS2	chr20_34929211_A_G_b38	rs1801310	1.3e-13	0.41	Brain - Cerebellum
ENSG00000101460.12	MAP1LC3A	chr20_34929211_A_G_b38	rs1801310	1.5e-13	0.39	Brain - Cerebellum
ENSG00000100983.9	GSS	chr20_34929211_A_G_b38	rs1801310	0.00014	0.19	Brain - Cerebellum
ENSG00000101460.12	MAP1LC3A	chr20_34929211_A_G_b38	rs1801310	8.6e-07	0.17	Brain - Cortex
ENSG00000198646.13	NCOA6	chr20_34929211_A_G_b38	rs1801310	0.00012	0.19	Brain - Cortex
ENSG00000100983.9	GSS	chr20_34929211_A_G_b38	rs1801310	0.00012	0.15	Brain - Cortex
ENSG00000101460.12	MAP1LC3A	chr20_34929211_A_G_b38	rs1801310	7.7e-06	0.14	Brain - Frontal Cortex (BA9)
ENSG00000131069.19	ACSS2	chr20_34929211_A_G_b38	rs1801310	3.7e-06	0.23	Brain - Nucleus accumbens (basal ganglia)
ENSG00000101460.12	MAP1LC3A	chr20_34929211_A_G_b38	rs1801310	6e-06	0.18	Brain - Nucleus accumbens (basal ganglia)
ENSG00000131069.19	ACSS2	chr20_34929211_A_G_b38	rs1801310	5.6e-08	-0.11	Cells - Cultured fibroblasts
ENSG00000131067.16	GGT7	chr20_34929211_A_G_b38	rs1801310	1.5e-07	-0.11	Cells - Cultured fibroblasts
ENSG00000101019.21	UQCC1	chr20_34929211_A_G_b38	rs1801310	1.2e-06	-0.19	Cells - Cultured fibroblasts
ENSG00000100983.9	GSS	chr20_34929211_A_G_b38	rs1801310	7.3e-06	0.097	Cells - Cultured fibroblasts
ENSG00000101460.12	MAP1LC3A	chr20_34929211_A_G_b38	rs1801310	0.00017	0.064	Cells - Cultured fibroblasts
ENSG00000101460.12	MAP1LC3A	chr20_34929211_A_G_b38	rs1801310	1.2e-11	0.23	Colon - Sigmoid
ENSG00000101464.10	PIGU	chr20_34929211_A_G_b38	rs1801310	3e-06	0.18	Colon - Sigmoid
ENSG00000088298.12	EDEM2	chr20_34929211_A_G_b38	rs1801310	0.00022	-0.14	Colon - Sigmoid
ENSG00000078814.15	MYH7B	chr20_34929211_A_G_b38	rs1801310	6e-11	0.26	Colon - Transverse
ENSG00000101460.12	MAP1LC3A	chr20_34929211_A_G_b38	rs1801310	1.3e-06	0.16	Colon - Transverse
ENSG00000131069.19	ACSS2	chr20_34929211_A_G_b38	rs1801310	4.9e-07	0.16	Esophagus - Gastroesophageal Junction
ENSG00000100983.9	GSS	chr20_34929211_A_G_b38	rs1801310	3.1e-06	0.2	Esophagus - Gastroesophageal Junction
ENSG00000100983.9	GSS	chr20_34929211_A_G_b38	rs1801310	3.7e-11	0.17	Esophagus - Mucosa
ENSG00000131067.16	GGT7	chr20_34929211_A_G_b38	rs1801310	1.2e-07	-0.14	Esophagus - Mucosa
ENSG00000100991.11	TRPC4AP	chr20_34929211_A_G_b38	rs1801310	2.4e-07	-0.14	Esophagus - Mucosa
ENSG00000125998.7	FAM83C	chr20_34929211_A_G_b38	rs1801310	9.8e-06	-0.13	Esophagus - Mucosa
ENSG00000101460.12	MAP1LC3A	chr20_34929211_A_G_b38	rs1801310	1.8e-11	0.18	Esophagus - Muscularis
ENSG00000131069.19	ACSS2	chr20_34929211_A_G_b38	rs1801310	3.4e-07	0.16	Esophagus - Muscularis
ENSG00000100983.9	GSS	chr20_34929211_A_G_b38	rs1801310	7.4e-07	0.18	Esophagus - Muscularis
ENSG00000100983.9	GSS	chr20_34929211_A_G_b38	rs1801310	1.9e-05	0.17	Heart - Atrial Appendage
ENSG00000101460.12	MAP1LC3A	chr20_34929211_A_G_b38	rs1801310	3.5e-05	0.13	Heart - Atrial Appendage
ENSG00000198646.13	NCOA6	chr20_34929211_A_G_b38	rs1801310	3.8e-05	0.14	Heart - Atrial Appendage
ENSG00000100983.9	GSS	chr20_34929211_A_G_b38	rs1801310	1.6e-07	0.19	Heart - Left Ventricle
ENSG00000101460.12	MAP1LC3A	chr20_34929211_A_G_b38	rs1801310	7.4e-07	0.15	Heart - Left Ventricle
ENSG00000126005.16	MMP24-AS1	chr20_34929211_A_G_b38	rs1801310	0.0001	-0.18	Heart - Left Ventricle
ENSG00000100983.9	GSS	chr20_34929211_A_G_b38	rs1801310	1.3e-06	0.12	Lung
ENSG00000131067.16	GGT7	chr20_34929211_A_G_b38	rs1801310	2.6e-05	-0.15	Lung
ENSG00000101460.12	MAP1LC3A	chr20_34929211_A_G_b38	rs1801310	2.8e-05	0.087	Lung
ENSG00000131067.16	GGT7	chr20_34929211_A_G_b38	rs1801310	2.2e-20	0.28	Muscle - Skeletal
ENSG00000100983.9	GSS	chr20_34929211_A_G_b38	rs1801310	5.6e-11	0.2	Muscle - Skeletal
ENSG00000101460.12	MAP1LC3A	chr20_34929211_A_G_b38	rs1801310	1.8e-07	0.15	Muscle - Skeletal
ENSG00000131069.19	ACSS2	chr20_34929211_A_G_b38	rs1801310	1.2e-06	0.12	Muscle - Skeletal
ENSG00000198646.13	NCOA6	chr20_34929211_A_G_b38	rs1801310	5.1e-05	0.096	Muscle - Skeletal
ENSG00000101464.10	PIGU	chr20_34929211_A_G_b38	rs1801310	5.9e-05	0.1	Muscle - Skeletal
ENSG00000244005.12	NFS1	chr20_34929211_A_G_b38	rs1801310	0.00011	0.092	Muscle - Skeletal
ENSG00000131069.19	ACSS2	chr20_34929211_A_G_b38	rs1801310	4.4e-18	0.3	Nerve - Tibial
ENSG00000100983.9	GSS	chr20_34929211_A_G_b38	rs1801310	1.4e-09	0.17	Nerve - Tibial
ENSG00000101460.12	MAP1LC3A	chr20_34929211_A_G_b38	rs1801310	1.1e-08	0.16	Nerve - Tibial
ENSG00000078814.15	MYH7B	chr20_34929211_A_G_b38	rs1801310	7.4e-06	0.1	Nerve - Tibial
ENSG00000125971.16	DYNLRB1	chr20_34929211_A_G_b38	rs1801310	0.00024	0.061	Nerve - Tibial
ENSG00000101460.12	MAP1LC3A	chr20_34929211_A_G_b38	rs1801310	3.1e-05	0.22	Ovary
ENSG00000078814.15	MYH7B	chr20_34929211_A_G_b38	rs1801310	8e-05	0.2	Ovary
ENSG00000088298.12	EDEM2	chr20_34929211_A_G_b38	rs1801310	1.5e-06	0.22	Pancreas
ENSG00000101000.5	PROCR	chr20_34929211_A_G_b38	rs1801310	2.4e-06	0.37	Pancreas
ENSG00000126005.16	MMP24-AS1	chr20_34929211_A_G_b38	rs1801310	9.7e-05	-0.21	Pancreas
ENSG00000131069.19	ACSS2	chr20_34929211_A_G_b38	rs1801310	1.7e-06	0.21	Pituitary
ENSG00000101460.12	MAP1LC3A	chr20_34929211_A_G_b38	rs1801310	2.3e-06	0.22	Pituitary
ENSG00000101460.12	MAP1LC3A	chr20_34929211_A_G_b38	rs1801310	5.8e-06	0.22	Prostate
ENSG00000100983.9	GSS	chr20_34929211_A_G_b38	rs1801310	2.3e-11	0.21	Skin - Not Sun Exposed (Suprapubic)
ENSG00000131067.16	GGT7	chr20_34929211_A_G_b38	rs1801310	6.1e-07	-0.18	Skin - Not Sun Exposed (Suprapubic)
ENSG00000078814.15	MYH7B	chr20_34929211_A_G_b38	rs1801310	7.4e-05	0.15	Skin - Not Sun Exposed (Suprapubic)
ENSG00000125998.7	FAM83C	chr20_34929211_A_G_b38	rs1801310	9.6e-05	-0.098	Skin - Not Sun Exposed (Suprapubic)
ENSG00000100983.9	GSS	chr20_34929211_A_G_b38	rs1801310	4.9e-20	0.23	Skin - Sun Exposed (Lower leg)
ENSG00000131067.16	GGT7	chr20_34929211_A_G_b38	rs1801310	2.5e-13	-0.22	Skin - Sun Exposed (Lower leg)
ENSG00000101460.12	MAP1LC3A	chr20_34929211_A_G_b38	rs1801310	3.3e-06	0.1	Skin - Sun Exposed (Lower leg)
ENSG00000078747.14	ITCH	chr20_34929211_A_G_b38	rs1801310	4.8e-05	-0.077	Skin - Sun Exposed (Lower leg)
ENSG00000101019.21	UQCC1	chr20_34929211_A_G_b38	rs1801310	0.00026	-0.12	Skin - Sun Exposed (Lower leg)
ENSG00000125998.7	FAM83C	chr20_34929211_A_G_b38	rs1801310	0.00027	-0.075	Skin - Sun Exposed (Lower leg)
ENSG00000078814.15	MYH7B	chr20_34929211_A_G_b38	rs1801310	3.8e-07	0.34	Small Intestine - Terminal Ileum
ENSG00000101460.12	MAP1LC3A	chr20_34929211_A_G_b38	rs1801310	5.2e-05	0.23	Spleen
ENSG00000078814.15	MYH7B	chr20_34929211_A_G_b38	rs1801310	0.00011	0.19	Spleen
ENSG00000101460.12	MAP1LC3A	chr20_34929211_A_G_b38	rs1801310	1.4e-05	0.16	Stomach
ENSG00000131069.19	ACSS2	chr20_34929211_A_G_b38	rs1801310	4.9e-05	0.12	Stomach
ENSG00000101464.10	PIGU	chr20_34929211_A_G_b38	rs1801310	7e-31	0.58	Testis
ENSG00000088298.12	EDEM2	chr20_34929211_A_G_b38	rs1801310	1.9e-05	-0.16	Testis
ENSG00000131069.19	ACSS2	chr20_34929211_A_G_b38	rs1801310	0.00038	-0.16	Testis
ENSG00000101460.12	MAP1LC3A	chr20_34929211_A_G_b38	rs1801310	3.8e-10	0.18	Thyroid
ENSG00000198646.13	NCOA6	chr20_34929211_A_G_b38	rs1801310	1.6e-06	0.13	Thyroid
ENSG00000078814.15	MYH7B	chr20_34929211_A_G_b38	rs1801310	2.8e-06	0.11	Thyroid
ENSG00000101464.10	PIGU	chr20_34929211_A_G_b38	rs1801310	6.4e-05	0.12	Thyroid
ENSG00000125970.11	RALY	chr20_34929211_A_G_b38	rs1801310	0.00016	0.081	Thyroid
ENSG00000126005.16	MMP24-AS1	chr20_34929211_A_G_b38	rs1801310	0.00017	-0.12	Thyroid
ENSG00000276073.1	RP5-1125A11.7	chr20_34929211_A_G_b38	rs1801310	0.0003	-0.14	Thyroid
ENSG00000131067.16	GGT7	chr20_34929211_A_G_b38	rs1801310	9.2e-09	-0.11	Whole Blood
ENSG00000101019.21	UQCC1	chr20_34929211_A_G_b38	rs1801310	1.1e-06	-0.13	Whole Blood
ENSG00000100991.11	TRPC4AP	chr20_34929211_A_G_b38	rs1801310	8e-05	-0.075	Whole Blood
ENSG00000078804.12	TP53INP2	chr20_34929211_A_G_b38	rs1801310	0.00022	-0.11	Whole Blood

## Sheet: rs6088660-eQTL
Gencode Id	Gene Symbol	Variant Id	SNP Id	P-Value	NES	Tissue
ENSG00000088298.12	EDEM2	chr20_34955093_C_T_b38	rs6088660	9.1e-07	0.14	Adipose - Subcutaneous
ENSG00000078814.15	MYH7B	chr20_34955093_C_T_b38	rs6088660	5.5e-05	-0.14	Adipose - Subcutaneous
ENSG00000100991.11	TRPC4AP	chr20_34955093_C_T_b38	rs6088660	0.00013	0.13	Adipose - Subcutaneous
ENSG00000088298.12	EDEM2	chr20_34955093_C_T_b38	rs6088660	2.6e-05	0.13	Adipose - Visceral (Omentum)
ENSG00000078814.15	MYH7B	chr20_34955093_C_T_b38	rs6088660	3.5e-09	-0.21	Artery - Aorta
ENSG00000100991.11	TRPC4AP	chr20_34955093_C_T_b38	rs6088660	0.00023	0.12	Artery - Aorta
ENSG00000198646.13	NCOA6	chr20_34955093_C_T_b38	rs6088660	1.6e-14	0.15	Artery - Tibial
ENSG00000078814.15	MYH7B	chr20_34955093_C_T_b38	rs6088660	1e-12	-0.19	Artery - Tibial
ENSG00000078804.12	TP53INP2	chr20_34955093_C_T_b38	rs6088660	4e-09	0.17	Artery - Tibial
ENSG00000100983.9	GSS	chr20_34955093_C_T_b38	rs6088660	2.3e-07	0.15	Artery - Tibial
ENSG00000101464.10	PIGU	chr20_34955093_C_T_b38	rs6088660	6e-06	0.13	Artery - Tibial
ENSG00000198646.13	NCOA6	chr20_34955093_C_T_b38	rs6088660	6e-05	0.21	Brain - Cerebellum
ENSG00000198646.13	NCOA6	chr20_34955093_C_T_b38	rs6088660	0.00013	0.2	Brain - Cortex
ENSG00000198646.13	NCOA6	chr20_34955093_C_T_b38	rs6088660	3e-05	0.27	Brain - Hippocampus
ENSG00000100991.11	TRPC4AP	chr20_34955093_C_T_b38	rs6088660	9.1e-06	0.16	Breast - Mammary Tissue
ENSG00000198646.13	NCOA6	chr20_34955093_C_T_b38	rs6088660	1.5e-05	0.16	Breast - Mammary Tissue
ENSG00000100991.11	TRPC4AP	chr20_34955093_C_T_b38	rs6088660	6.2e-09	0.15	Cells - Cultured fibroblasts
ENSG00000088298.12	EDEM2	chr20_34955093_C_T_b38	rs6088660	4.8e-07	0.19	Cells - Cultured fibroblasts
ENSG00000078814.15	MYH7B	chr20_34955093_C_T_b38	rs6088660	9.9e-06	-0.16	Cells - Cultured fibroblasts
ENSG00000101000.5	PROCR	chr20_34955093_C_T_b38	rs6088660	0.00063	0.12	Cells - Cultured fibroblasts
ENSG00000100991.11	TRPC4AP	chr20_34955093_C_T_b38	rs6088660	4.4e-06	0.16	Colon - Sigmoid
ENSG00000100983.9	GSS	chr20_34955093_C_T_b38	rs6088660	1.6e-08	0.24	Esophagus - Gastroesophageal Junction
ENSG00000100991.11	TRPC4AP	chr20_34955093_C_T_b38	rs6088660	2.8e-05	0.16	Esophagus - Gastroesophageal Junction
ENSG00000198646.13	NCOA6	chr20_34955093_C_T_b38	rs6088660	3.1e-05	0.13	Esophagus - Gastroesophageal Junction
ENSG00000100983.9	GSS	chr20_34955093_C_T_b38	rs6088660	3.5e-08	0.15	Esophagus - Mucosa
ENSG00000088298.12	EDEM2	chr20_34955093_C_T_b38	rs6088660	3.2e-05	0.14	Esophagus - Mucosa
ENSG00000100983.9	GSS	chr20_34955093_C_T_b38	rs6088660	3.2e-07	0.19	Esophagus - Muscularis
ENSG00000100991.11	TRPC4AP	chr20_34955093_C_T_b38	rs6088660	5.9e-07	0.13	Esophagus - Muscularis
ENSG00000078814.15	MYH7B	chr20_34955093_C_T_b38	rs6088660	0.00023	-0.1	Esophagus - Muscularis
ENSG00000198646.13	NCOA6	chr20_34955093_C_T_b38	rs6088660	0.00029	0.089	Esophagus - Muscularis
ENSG00000198646.13	NCOA6	chr20_34955093_C_T_b38	rs6088660	3.6e-09	0.19	Heart - Atrial Appendage
ENSG00000100983.9	GSS	chr20_34955093_C_T_b38	rs6088660	5.1e-09	0.22	Heart - Atrial Appendage
ENSG00000100983.9	GSS	chr20_34955093_C_T_b38	rs6088660	1.7e-16	0.29	Heart - Left Ventricle
ENSG00000100991.11	TRPC4AP	chr20_34955093_C_T_b38	rs6088660	1.2e-09	0.13	Lung
ENSG00000078814.15	MYH7B	chr20_34955093_C_T_b38	rs6088660	7.2e-07	-0.13	Lung
ENSG00000088298.12	EDEM2	chr20_34955093_C_T_b38	rs6088660	3.4e-06	0.13	Lung
ENSG00000100983.9	GSS	chr20_34955093_C_T_b38	rs6088660	1.2e-05	0.12	Lung
ENSG00000131067.16	GGT7	chr20_34955093_C_T_b38	rs6088660	0.00019	-0.14	Lung
ENSG00000100983.9	GSS	chr20_34955093_C_T_b38	rs6088660	1.4e-10	0.21	Muscle - Skeletal
ENSG00000131067.16	GGT7	chr20_34955093_C_T_b38	rs6088660	1.2e-06	0.15	Muscle - Skeletal
ENSG00000198646.13	NCOA6	chr20_34955093_C_T_b38	rs6088660	0.00022	0.091	Muscle - Skeletal
ENSG00000100991.11	TRPC4AP	chr20_34955093_C_T_b38	rs6088660	1.2e-10	0.17	Nerve - Tibial
ENSG00000078814.15	MYH7B	chr20_34955093_C_T_b38	rs6088660	1.8e-06	-0.11	Nerve - Tibial
ENSG00000131069.19	ACSS2	chr20_34955093_C_T_b38	rs6088660	0.00013	0.14	Nerve - Tibial
ENSG00000100983.9	GSS	chr20_34955093_C_T_b38	rs6088660	0.00018	0.11	Nerve - Tibial
ENSG00000198646.13	NCOA6	chr20_34955093_C_T_b38	rs6088660	0.00055	0.099	Nerve - Tibial
ENSG00000100991.11	TRPC4AP	chr20_34955093_C_T_b38	rs6088660	1.7e-05	0.25	Ovary
ENSG00000131067.16	GGT7	chr20_34955093_C_T_b38	rs6088660	5.5e-08	-0.2	Skin - Not Sun Exposed (Suprapubic)
ENSG00000100991.11	TRPC4AP	chr20_34955093_C_T_b38	rs6088660	6.6e-08	0.13	Skin - Not Sun Exposed (Suprapubic)
ENSG00000100983.9	GSS	chr20_34955093_C_T_b38	rs6088660	2.6e-05	0.13	Skin - Not Sun Exposed (Suprapubic)
ENSG00000101440.9	ASIP	chr20_34955093_C_T_b38	rs6088660	0.00038	0.13	Skin - Not Sun Exposed (Suprapubic)
ENSG00000100983.9	GSS	chr20_34955093_C_T_b38	rs6088660	3.5e-07	0.14	Skin - Sun Exposed (Lower leg)
ENSG00000100991.11	TRPC4AP	chr20_34955093_C_T_b38	rs6088660	2.3e-06	0.11	Skin - Sun Exposed (Lower leg)
ENSG00000078814.15	MYH7B	chr20_34955093_C_T_b38	rs6088660	4.3e-06	-0.15	Skin - Sun Exposed (Lower leg)
ENSG00000131067.16	GGT7	chr20_34955093_C_T_b38	rs6088660	3.5e-05	-0.13	Skin - Sun Exposed (Lower leg)
ENSG00000198646.13	NCOA6	chr20_34955093_C_T_b38	rs6088660	9e-06	0.24	Spleen
ENSG00000100991.11	TRPC4AP	chr20_34955093_C_T_b38	rs6088660	1e-05	0.2	Spleen
ENSG00000101464.10	PIGU	chr20_34955093_C_T_b38	rs6088660	2.9e-12	0.41	Testis
ENSG00000198646.13	NCOA6	chr20_34955093_C_T_b38	rs6088660	9.6e-05	0.13	Testis
ENSG00000100991.11	TRPC4AP	chr20_34955093_C_T_b38	rs6088660	2.3e-11	0.15	Thyroid
ENSG00000198646.13	NCOA6	chr20_34955093_C_T_b38	rs6088660	1.7e-10	0.18	Thyroid
ENSG00000078804.12	TP53INP2	chr20_34955093_C_T_b38	rs6088660	0.00016	-0.099	Thyroid
ENSG00000101460.12	MAP1LC3A	chr20_34955093_C_T_b38	rs6088660	7.5e-10	-0.14	Whole Blood
ENSG00000100991.11	TRPC4AP	chr20_34955093_C_T_b38	rs6088660	5.1e-05	0.078	Whole Blood
ENSG00000131067.16	GGT7	chr20_34955093_C_T_b38	rs6088660	8.3e-05	-0.074	Whole Blood

## Sheet: rs6119534-eQTL
Gencode Id	Gene Symbol	Variant Id	SNP Id	P-Value	NES	Tissue
ENSG00000101460.12	MAP1LC3A	chr20_34853454_C_T_b38	rs6119534	3.6e-23	0.28	Adipose - Subcutaneous
ENSG00000101000.5	PROCR	chr20_34853454_C_T_b38	rs6119534	1.1e-10	-0.22	Adipose - Subcutaneous
ENSG00000088298.12	EDEM2	chr20_34853454_C_T_b38	rs6119534	6.3e-06	-0.12	Adipose - Subcutaneous
ENSG00000276073.1	RP5-1125A11.7	chr20_34853454_C_T_b38	rs6119534	0.00018	-0.17	Adipose - Subcutaneous
ENSG00000100991.11	TRPC4AP	chr20_34853454_C_T_b38	rs6119534	0.00047	-0.11	Adipose - Subcutaneous
ENSG00000101460.12	MAP1LC3A	chr20_34853454_C_T_b38	rs6119534	1.7e-24	0.27	Adipose - Visceral (Omentum)
ENSG00000276073.1	RP5-1125A11.7	chr20_34853454_C_T_b38	rs6119534	7e-06	-0.36	Adrenal Gland
ENSG00000101460.12	MAP1LC3A	chr20_34853454_C_T_b38	rs6119534	3.4e-10	0.21	Artery - Aorta
ENSG00000088298.12	EDEM2	chr20_34853454_C_T_b38	rs6119534	7.8e-07	-0.16	Artery - Aorta
ENSG00000101000.5	PROCR	chr20_34853454_C_T_b38	rs6119534	6.6e-05	-0.18	Artery - Aorta
ENSG00000101460.12	MAP1LC3A	chr20_34853454_C_T_b38	rs6119534	8.4e-26	0.21	Artery - Tibial
ENSG00000088298.12	EDEM2	chr20_34853454_C_T_b38	rs6119534	1.3e-10	-0.16	Artery - Tibial
ENSG00000101000.5	PROCR	chr20_34853454_C_T_b38	rs6119534	2.9e-06	-0.12	Artery - Tibial
ENSG00000078804.12	TP53INP2	chr20_34853454_C_T_b38	rs6119534	1.7e-05	0.12	Artery - Tibial
ENSG00000198646.13	NCOA6	chr20_34853454_C_T_b38	rs6119534	7.2e-05	0.079	Artery - Tibial
ENSG00000101460.12	MAP1LC3A	chr20_34853454_C_T_b38	rs6119534	9.5e-06	0.2	Brain - Amygdala
ENSG00000101460.12	MAP1LC3A	chr20_34853454_C_T_b38	rs6119534	1.9e-06	0.2	Brain - Anterior cingulate cortex (BA24)
ENSG00000131069.19	ACSS2	chr20_34853454_C_T_b38	rs6119534	4e-06	0.22	Brain - Caudate (basal ganglia)
ENSG00000101460.12	MAP1LC3A	chr20_34853454_C_T_b38	rs6119534	8.4e-06	0.16	Brain - Caudate (basal ganglia)
ENSG00000101460.12	MAP1LC3A	chr20_34853454_C_T_b38	rs6119534	1.2e-15	0.36	Brain - Cerebellar Hemisphere
ENSG00000131069.19	ACSS2	chr20_34853454_C_T_b38	rs6119534	5.4e-06	0.25	Brain - Cerebellar Hemisphere
ENSG00000078814.15	MYH7B	chr20_34853454_C_T_b38	rs6119534	0.00011	0.29	Brain - Cerebellar Hemisphere
ENSG00000101460.12	MAP1LC3A	chr20_34853454_C_T_b38	rs6119534	4e-15	0.4	Brain - Cerebellum
ENSG00000078814.15	MYH7B	chr20_34853454_C_T_b38	rs6119534	2.1e-07	0.35	Brain - Cerebellum
ENSG00000131069.19	ACSS2	chr20_34853454_C_T_b38	rs6119534	3.2e-05	0.24	Brain - Cerebellum
ENSG00000101460.12	MAP1LC3A	chr20_34853454_C_T_b38	rs6119534	1.2e-09	0.2	Brain - Cortex
ENSG00000088298.12	EDEM2	chr20_34853454_C_T_b38	rs6119534	3.2e-09	-0.34	Brain - Cortex
ENSG00000101460.12	MAP1LC3A	chr20_34853454_C_T_b38	rs6119534	1.8e-06	0.14	Brain - Frontal Cortex (BA9)
ENSG00000101460.12	MAP1LC3A	chr20_34853454_C_T_b38	rs6119534	7.4e-05	0.18	Brain - Hypothalamus
ENSG00000101460.12	MAP1LC3A	chr20_34853454_C_T_b38	rs6119534	8.6e-07	0.2	Brain - Nucleus accumbens (basal ganglia)
ENSG00000131069.19	ACSS2	chr20_34853454_C_T_b38	rs6119534	7.4e-05	0.2	Brain - Nucleus accumbens (basal ganglia)
ENSG00000101460.12	MAP1LC3A	chr20_34853454_C_T_b38	rs6119534	0.00013	0.18	Brain - Putamen (basal ganglia)
ENSG00000101460.12	MAP1LC3A	chr20_34853454_C_T_b38	rs6119534	5.1e-12	0.21	Breast - Mammary Tissue
ENSG00000101000.5	PROCR	chr20_34853454_C_T_b38	rs6119534	0.00014	-0.11	Breast - Mammary Tissue
ENSG00000101019.21	UQCC1	chr20_34853454_C_T_b38	rs6119534	3.9e-06	-0.17	Cells - Cultured fibroblasts
ENSG00000101000.5	PROCR	chr20_34853454_C_T_b38	rs6119534	1e-05	0.13	Cells - Cultured fibroblasts
ENSG00000101460.12	MAP1LC3A	chr20_34853454_C_T_b38	rs6119534	1.6e-05	0.072	Cells - Cultured fibroblasts
ENSG00000101464.10	PIGU	chr20_34853454_C_T_b38	rs6119534	4e-05	0.085	Cells - Cultured fibroblasts
ENSG00000101460.12	MAP1LC3A	chr20_34853454_C_T_b38	rs6119534	1.1e-08	0.2	Colon - Sigmoid
ENSG00000088298.12	EDEM2	chr20_34853454_C_T_b38	rs6119534	1.2e-05	-0.17	Colon - Sigmoid
ENSG00000101460.12	MAP1LC3A	chr20_34853454_C_T_b38	rs6119534	1.4e-09	0.19	Colon - Transverse
ENSG00000078814.15	MYH7B	chr20_34853454_C_T_b38	rs6119534	2.5e-09	0.24	Colon - Transverse
ENSG00000101460.12	MAP1LC3A	chr20_34853454_C_T_b38	rs6119534	2.9e-06	0.17	Esophagus - Gastroesophageal Junction
ENSG00000088298.12	EDEM2	chr20_34853454_C_T_b38	rs6119534	8e-05	-0.13	Esophagus - Gastroesophageal Junction
ENSG00000100991.11	TRPC4AP	chr20_34853454_C_T_b38	rs6119534	1.3e-06	-0.13	Esophagus - Mucosa
ENSG00000125998.7	FAM83C	chr20_34853454_C_T_b38	rs6119534	7.8e-06	-0.13	Esophagus - Mucosa
ENSG00000078804.12	TP53INP2	chr20_34853454_C_T_b38	rs6119534	5.5e-05	-0.096	Esophagus - Mucosa
ENSG00000101460.12	MAP1LC3A	chr20_34853454_C_T_b38	rs6119534	1.6e-15	0.22	Esophagus - Muscularis
ENSG00000276073.1	RP5-1125A11.7	chr20_34853454_C_T_b38	rs6119534	9.9e-05	-0.21	Esophagus - Muscularis
ENSG00000078814.15	MYH7B	chr20_34853454_C_T_b38	rs6119534	0.0004	0.098	Esophagus - Muscularis
ENSG00000100991.11	TRPC4AP	chr20_34853454_C_T_b38	rs6119534	0.00042	-0.094	Esophagus - Muscularis
ENSG00000088298.12	EDEM2	chr20_34853454_C_T_b38	rs6119534	1.1e-07	-0.19	Heart - Atrial Appendage
ENSG00000101460.12	MAP1LC3A	chr20_34853454_C_T_b38	rs6119534	2.9e-07	0.16	Heart - Atrial Appendage
ENSG00000100991.11	TRPC4AP	chr20_34853454_C_T_b38	rs6119534	2.4e-05	-0.15	Heart - Atrial Appendage
ENSG00000101000.5	PROCR	chr20_34853454_C_T_b38	rs6119534	0.00017	-0.17	Heart - Atrial Appendage
ENSG00000101460.12	MAP1LC3A	chr20_34853454_C_T_b38	rs6119534	4.8e-09	0.17	Heart - Left Ventricle
ENSG00000101000.5	PROCR	chr20_34853454_C_T_b38	rs6119534	3.2e-06	-0.22	Heart - Left Ventricle
ENSG00000100991.11	TRPC4AP	chr20_34853454_C_T_b38	rs6119534	1e-05	-0.14	Heart - Left Ventricle
ENSG00000088298.12	EDEM2	chr20_34853454_C_T_b38	rs6119534	7.6e-05	-0.13	Heart - Left Ventricle
ENSG00000101460.12	MAP1LC3A	chr20_34853454_C_T_b38	rs6119534	9.2e-07	0.21	Liver
ENSG00000101460.12	MAP1LC3A	chr20_34853454_C_T_b38	rs6119534	5.5e-08	0.11	Lung
ENSG00000131067.16	GGT7	chr20_34853454_C_T_b38	rs6119534	8.7e-38	0.37	Muscle - Skeletal
ENSG00000131069.19	ACSS2	chr20_34853454_C_T_b38	rs6119534	1.5e-08	0.14	Muscle - Skeletal
ENSG00000101460.12	MAP1LC3A	chr20_34853454_C_T_b38	rs6119534	1.5e-07	0.15	Muscle - Skeletal
ENSG00000101000.5	PROCR	chr20_34853454_C_T_b38	rs6119534	1.5e-05	-0.14	Muscle - Skeletal
ENSG00000088298.12	EDEM2	chr20_34853454_C_T_b38	rs6119534	2.3e-05	-0.085	Muscle - Skeletal
ENSG00000100983.9	GSS	chr20_34853454_C_T_b38	rs6119534	0.00015	0.12	Muscle - Skeletal
ENSG00000101460.12	MAP1LC3A	chr20_34853454_C_T_b38	rs6119534	6.1e-13	0.19	Nerve - Tibial
ENSG00000131069.19	ACSS2	chr20_34853454_C_T_b38	rs6119534	6.2e-13	0.24	Nerve - Tibial
ENSG00000088298.12	EDEM2	chr20_34853454_C_T_b38	rs6119534	4.5e-09	-0.15	Nerve - Tibial
ENSG00000276073.1	RP5-1125A11.7	chr20_34853454_C_T_b38	rs6119534	1.4e-07	-0.25	Nerve - Tibial
ENSG00000101000.5	PROCR	chr20_34853454_C_T_b38	rs6119534	2.5e-05	-0.12	Nerve - Tibial
ENSG00000078814.15	MYH7B	chr20_34853454_C_T_b38	rs6119534	2.8e-05	0.09	Nerve - Tibial
ENSG00000181741.7	FDX1P1	chr20_34853454_C_T_b38	rs6119534	0.00052	0.2	Nerve - Tibial
ENSG00000101460.12	MAP1LC3A	chr20_34853454_C_T_b38	rs6119534	7e-05	0.23	Ovary
ENSG00000088298.12	EDEM2	chr20_34853454_C_T_b38	rs6119534	6.1e-08	0.25	Pancreas
ENSG00000101000.5	PROCR	chr20_34853454_C_T_b38	rs6119534	2.7e-05	0.34	Pancreas
ENSG00000078814.15	MYH7B	chr20_34853454_C_T_b38	rs6119534	4.3e-05	0.19	Pancreas
ENSG00000101460.12	MAP1LC3A	chr20_34853454_C_T_b38	rs6119534	5.6e-05	0.19	Pituitary
ENSG00000101460.12	MAP1LC3A	chr20_34853454_C_T_b38	rs6119534	5.7e-06	0.23	Prostate
ENSG00000125998.7	FAM83C	chr20_34853454_C_T_b38	rs6119534	1.8e-05	-0.11	Skin - Not Sun Exposed (Suprapubic)
ENSG00000100983.9	GSS	chr20_34853454_C_T_b38	rs6119534	5.5e-05	0.12	Skin - Not Sun Exposed (Suprapubic)
ENSG00000131067.16	GGT7	chr20_34853454_C_T_b38	rs6119534	7.4e-05	-0.14	Skin - Not Sun Exposed (Suprapubic)
ENSG00000078747.14	ITCH	chr20_34853454_C_T_b38	rs6119534	0.00021	-0.082	Skin - Not Sun Exposed (Suprapubic)
ENSG00000242372.6	EIF6	chr20_34853454_C_T_b38	rs6119534	0.00027	0.064	Skin - Not Sun Exposed (Suprapubic)
ENSG00000198646.13	NCOA6	chr20_34853454_C_T_b38	rs6119534	0.00027	-0.074	Skin - Not Sun Exposed (Suprapubic)
ENSG00000101000.5	PROCR	chr20_34853454_C_T_b38	rs6119534	0.00058	-0.11	Skin - Not Sun Exposed (Suprapubic)
ENSG00000131067.16	GGT7	chr20_34853454_C_T_b38	rs6119534	5.3e-13	-0.22	Skin - Sun Exposed (Lower leg)
ENSG00000078747.14	ITCH	chr20_34853454_C_T_b38	rs6119534	6.2e-09	-0.11	Skin - Sun Exposed (Lower leg)
ENSG00000101460.12	MAP1LC3A	chr20_34853454_C_T_b38	rs6119534	7.6e-09	0.13	Skin - Sun Exposed (Lower leg)
ENSG00000101000.5	PROCR	chr20_34853454_C_T_b38	rs6119534	1.3e-06	-0.15	Skin - Sun Exposed (Lower leg)
ENSG00000100983.9	GSS	chr20_34853454_C_T_b38	rs6119534	4.3e-06	0.12	Skin - Sun Exposed (Lower leg)
ENSG00000276073.1	RP5-1125A11.7	chr20_34853454_C_T_b38	rs6119534	0.00029	-0.15	Skin - Sun Exposed (Lower leg)
ENSG00000078814.15	MYH7B	chr20_34853454_C_T_b38	rs6119534	2.5e-06	0.34	Small Intestine - Terminal Ileum
ENSG00000101460.12	MAP1LC3A	chr20_34853454_C_T_b38	rs6119534	1.5e-05	0.21	Small Intestine - Terminal Ileum
ENSG00000101460.12	MAP1LC3A	chr20_34853454_C_T_b38	rs6119534	4.4e-08	0.3	Spleen
ENSG00000101000.5	PROCR	chr20_34853454_C_T_b38	rs6119534	1.6e-05	0.31	Spleen
ENSG00000078814.15	MYH7B	chr20_34853454_C_T_b38	rs6119534	0.00017	0.18	Spleen
ENSG00000101460.12	MAP1LC3A	chr20_34853454_C_T_b38	rs6119534	2.1e-06	0.18	Stomach
ENSG00000131067.16	GGT7	chr20_34853454_C_T_b38	rs6119534	1.8e-05	-0.19	Stomach
ENSG00000101460.12	MAP1LC3A	chr20_34853454_C_T_b38	rs6119534	7.2e-13	0.34	Testis
ENSG00000101464.10	PIGU	chr20_34853454_C_T_b38	rs6119534	1.3e-12	0.39	Testis
ENSG00000088298.12	EDEM2	chr20_34853454_C_T_b38	rs6119534	5.6e-07	-0.19	Testis
ENSG00000101460.12	MAP1LC3A	chr20_34853454_C_T_b38	rs6119534	3.4e-27	0.29	Thyroid
ENSG00000078814.15	MYH7B	chr20_34853454_C_T_b38	rs6119534	5.4e-10	0.14	Thyroid
ENSG00000276073.1	RP5-1125A11.7	chr20_34853454_C_T_b38	rs6119534	5.4e-09	-0.22	Thyroid
ENSG00000078747.14	ITCH	chr20_34853454_C_T_b38	rs6119534	8.4e-06	0.099	Thyroid
ENSG00000279253.1	RP4-614O4.13	chr20_34853454_C_T_b38	rs6119534	5e-05	-0.17	Thyroid
ENSG00000100991.11	TRPC4AP	chr20_34853454_C_T_b38	rs6119534	0.00056	-0.075	Thyroid
ENSG00000088298.12	EDEM2	chr20_34853454_C_T_b38	rs6119534	0.00056	-0.1	Thyroid
ENSG00000181741.7	FDX1P1	chr20_34853454_C_T_b38	rs6119534	2.4e-05	0.39	Vagina
ENSG00000101460.12	MAP1LC3A	chr20_34853454_C_T_b38	rs6119534	0.0001	0.085	Whole Blood
ENSG00000088298.12	EDEM2	chr20_34853454_C_T_b38	rs6119534	0.00024	-0.057	Whole Blood

## Sheet: rs11546155-eQTL
Gencode Id	Gene Symbol	Variant Id	SNP Id	P-Value	NES	Tissue
ENSG00000101460.12	MAP1LC3A	chr20_34863345_G_A_b38	rs11546155	1.5e-05	-0.17	Adipose - Subcutaneous
ENSG00000078804.12	TP53INP2	chr20_34863345_G_A_b38	rs11546155	7.2e-05	-0.16	Adipose - Subcutaneous
ENSG00000198646.13	NCOA6	chr20_34863345_G_A_b38	rs11546155	0.00012	0.14	Adipose - Subcutaneous
ENSG00000198646.13	NCOA6	chr20_34863345_G_A_b38	rs11546155	3.9e-08	0.26	Adipose - Visceral (Omentum)
ENSG00000101460.12	MAP1LC3A	chr20_34863345_G_A_b38	rs11546155	1.6e-05	-0.16	Adipose - Visceral (Omentum)
ENSG00000131067.16	GGT7	chr20_34863345_G_A_b38	rs11546155	0.00011	-0.13	Adipose - Visceral (Omentum)
ENSG00000198646.13	NCOA6	chr20_34863345_G_A_b38	rs11546155	1.7e-06	0.39	Adrenal Gland
ENSG00000078804.12	TP53INP2	chr20_34863345_G_A_b38	rs11546155	1.6e-07	-0.24	Artery - Aorta
ENSG00000198646.13	NCOA6	chr20_34863345_G_A_b38	rs11546155	6.3e-06	0.18	Artery - Aorta
ENSG00000131067.16	GGT7	chr20_34863345_G_A_b38	rs11546155	6.1e-05	-0.15	Artery - Aorta
ENSG00000198646.13	NCOA6	chr20_34863345_G_A_b38	rs11546155	3.1e-06	0.29	Artery - Coronary
ENSG00000198646.13	NCOA6	chr20_34863345_G_A_b38	rs11546155	1.2e-05	0.12	Artery - Tibial
ENSG00000101460.12	MAP1LC3A	chr20_34863345_G_A_b38	rs11546155	2.8e-05	-0.12	Artery - Tibial
ENSG00000131067.16	GGT7	chr20_34863345_G_A_b38	rs11546155	0.00019	-0.12	Artery - Tibial
ENSG00000101464.10	PIGU	chr20_34863345_G_A_b38	rs11546155	0.00037	0.14	Artery - Tibial
ENSG00000198646.13	NCOA6	chr20_34863345_G_A_b38	rs11546155	1e-08	0.47	Brain - Cerebellar Hemisphere
ENSG00000198646.13	NCOA6	chr20_34863345_G_A_b38	rs11546155	1.8e-07	0.34	Brain - Cerebellum
ENSG00000198646.13	NCOA6	chr20_34863345_G_A_b38	rs11546155	2.2e-05	0.27	Brain - Cortex
ENSG00000198646.13	NCOA6	chr20_34863345_G_A_b38	rs11546155	9.9e-05	0.3	Brain - Frontal Cortex (BA9)
ENSG00000198646.13	NCOA6	chr20_34863345_G_A_b38	rs11546155	3.8e-05	0.33	Brain - Hippocampus
ENSG00000198646.13	NCOA6	chr20_34863345_G_A_b38	rs11546155	7.9e-05	0.33	Brain - Nucleus accumbens (basal ganglia)
ENSG00000198646.13	NCOA6	chr20_34863345_G_A_b38	rs11546155	1.8e-06	0.23	Breast - Mammary Tissue
ENSG00000078804.12	TP53INP2	chr20_34863345_G_A_b38	rs11546155	5.7e-08	-0.19	Cells - Cultured fibroblasts
ENSG00000131067.16	GGT7	chr20_34863345_G_A_b38	rs11546155	6.4e-05	-0.12	Cells - Cultured fibroblasts
ENSG00000100983.9	GSS	chr20_34863345_G_A_b38	rs11546155	0.00023	0.11	Cells - Cultured fibroblasts
ENSG00000078804.12	TP53INP2	chr20_34863345_G_A_b38	rs11546155	1.2e-08	-0.38	Colon - Sigmoid
ENSG00000198646.13	NCOA6	chr20_34863345_G_A_b38	rs11546155	1e-07	0.2	Esophagus - Gastroesophageal Junction
ENSG00000198646.13	NCOA6	chr20_34863345_G_A_b38	rs11546155	2.1e-06	0.15	Esophagus - Mucosa
ENSG00000100983.9	GSS	chr20_34863345_G_A_b38	rs11546155	4.8e-05	0.15	Esophagus - Mucosa
ENSG00000198646.13	NCOA6	chr20_34863345_G_A_b38	rs11546155	1.2e-14	0.24	Esophagus - Muscularis
ENSG00000100983.9	GSS	chr20_34863345_G_A_b38	rs11546155	1.1e-08	0.29	Heart - Left Ventricle
ENSG00000198646.13	NCOA6	chr20_34863345_G_A_b38	rs11546155	4e-05	0.15	Heart - Left Ventricle
ENSG00000198646.13	NCOA6	chr20_34863345_G_A_b38	rs11546155	1.3e-06	0.14	Lung
ENSG00000101464.10	PIGU	chr20_34863345_G_A_b38	rs11546155	1e-05	0.16	Muscle - Skeletal
ENSG00000100983.9	GSS	chr20_34863345_G_A_b38	rs11546155	0.00042	0.15	Muscle - Skeletal
ENSG00000198646.13	NCOA6	chr20_34863345_G_A_b38	rs11546155	3.5e-10	0.23	Nerve - Tibial
ENSG00000101460.12	MAP1LC3A	chr20_34863345_G_A_b38	rs11546155	6e-05	-0.15	Nerve - Tibial
ENSG00000181741.7	FDX1P1	chr20_34863345_G_A_b38	rs11546155	0.00028	-0.29	Nerve - Tibial
ENSG00000198646.13	NCOA6	chr20_34863345_G_A_b38	rs11546155	0.00015	0.26	Pituitary
ENSG00000101440.9	ASIP	chr20_34863345_G_A_b38	rs11546155	2.6e-08	0.27	Skin - Not Sun Exposed (Suprapubic)
ENSG00000198646.13	NCOA6	chr20_34863345_G_A_b38	rs11546155	7.3e-08	0.14	Skin - Not Sun Exposed (Suprapubic)
ENSG00000100983.9	GSS	chr20_34863345_G_A_b38	rs11546155	1.2e-05	0.18	Skin - Not Sun Exposed (Suprapubic)
ENSG00000101440.9	ASIP	chr20_34863345_G_A_b38	rs11546155	8.4e-10	0.29	Skin - Sun Exposed (Lower leg)
ENSG00000100983.9	GSS	chr20_34863345_G_A_b38	rs11546155	2.3e-06	0.17	Skin - Sun Exposed (Lower leg)
ENSG00000198646.13	NCOA6	chr20_34863345_G_A_b38	rs11546155	6.8e-07	0.33	Spleen
ENSG00000078804.12	TP53INP2	chr20_34863345_G_A_b38	rs11546155	4.7e-05	-0.36	Spleen
ENSG00000198646.13	NCOA6	chr20_34863345_G_A_b38	rs11546155	6e-06	0.23	Stomach
ENSG00000198646.13	NCOA6	chr20_34863345_G_A_b38	rs11546155	6e-13	0.31	Testis
ENSG00000101460.12	MAP1LC3A	chr20_34863345_G_A_b38	rs11546155	3.8e-09	-0.41	Testis
ENSG00000101464.10	PIGU	chr20_34863345_G_A_b38	rs11546155	2.1e-08	0.45	Testis
ENSG00000198646.13	NCOA6	chr20_34863345_G_A_b38	rs11546155	2.8e-10	0.23	Thyroid
ENSG00000078804.12	TP53INP2	chr20_34863345_G_A_b38	rs11546155	8.5e-10	-0.21	Thyroid
ENSG00000101460.12	MAP1LC3A	chr20_34863345_G_A_b38	rs11546155	3.1e-08	-0.21	Thyroid
ENSG00000100991.11	TRPC4AP	chr20_34863345_G_A_b38	rs11546155	0.00031	0.11	Thyroid
ENSG00000101460.12	MAP1LC3A	chr20_34863345_G_A_b38	rs11546155	1.4e-22	-0.3	Whole Blood
ENSG00000100991.11	TRPC4AP	chr20_34863345_G_A_b38	rs11546155	9.7e-05	0.1	Whole Blood
ENSG00000131067.16	GGT7	chr20_34863345_G_A_b38	rs11546155	0.00011	-0.097	Whole Blood

## Sheet: rs13041792-sQTL
Gencode Id	Gene Symbol	Variant Id	SNP Id	Phenotype Id	Intron Id	P-Value	NES	Tissue
ENSG00000100991.11	TRPC4AP	chr20_34957252_G_A_b38	rs13041792	chr20:35008747:35010187:clu_32656:ENSG00000100991.11	35008747:35010187:clu_32656	1.7e-47	-0.73	Thyroid
ENSG00000100991.11	TRPC4AP	chr20_34957252_G_A_b38	rs13041792	chr20:35008747:35010187:clu_32656:ENSG00000100991.11	35008747:35010187:clu_32656	1.7e-47	-0.73	Thyroid
ENSG00000100991.11	TRPC4AP	chr20_34957252_G_A_b38	rs13041792	chr20:35008747:35010187:clu_31486:ENSG00000100991.11	35008747:35010187:clu_31486	1.1e-43	-0.83	Nerve - Tibial
ENSG00000100991.11	TRPC4AP	chr20_34957252_G_A_b38	rs13041792	chr20:35008747:35010187:clu_31486:ENSG00000100991.11	35008747:35010187:clu_31486	1.1e-43	-0.83	Nerve - Tibial
ENSG00000100991.11	TRPC4AP	chr20_34957252_G_A_b38	rs13041792	chr20:35008747:35010187:clu_30577:ENSG00000100991.11	35008747:35010187:clu_30577	2.1e-43	-0.87	Skin - Not Sun Exposed (Suprapubic)
ENSG00000100991.11	TRPC4AP	chr20_34957252_G_A_b38	rs13041792	chr20:35009178:35010187:clu_32118:ENSG00000100991.11	35009178:35010187:clu_32118	1.8e-38	0.68	Lung
ENSG00000100991.11	TRPC4AP	chr20_34957252_G_A_b38	rs13041792	chr20:35009178:35010187:clu_32118:ENSG00000100991.11	35009178:35010187:clu_32118	1.8e-38	0.68	Lung
ENSG00000100991.11	TRPC4AP	chr20_34957252_G_A_b38	rs13041792	chr20:35008747:35010187:clu_28049:ENSG00000100991.11	35008747:35010187:clu_28049	1.4e-28	-0.7	Artery - Tibial
ENSG00000100991.11	TRPC4AP	chr20_34957252_G_A_b38	rs13041792	chr20:35008747:35010187:clu_28049:ENSG00000100991.11	35008747:35010187:clu_28049	1.4e-28	-0.7	Artery - Tibial
ENSG00000100991.11	TRPC4AP	chr20_34957252_G_A_b38	rs13041792	chr20:35009178:35010187:clu_27110:ENSG00000100991.11	35009178:35010187:clu_27110	1.1e-21	0.74	Artery - Aorta
ENSG00000100991.11	TRPC4AP	chr20_34957252_G_A_b38	rs13041792	chr20:35008747:35010187:clu_28162:ENSG00000100991.11	35008747:35010187:clu_28162	1.7e-18	-0.57	Esophagus - Muscularis
ENSG00000100991.11	TRPC4AP	chr20_34957252_G_A_b38	rs13041792	chr20:35008747:35010187:clu_27593:ENSG00000100991.11	35008747:35010187:clu_27593	7.6e-18	-0.69	Colon - Sigmoid
ENSG00000100991.11	TRPC4AP	chr20_34957252_G_A_b38	rs13041792	chr20:35008747:35010187:clu_28231:ENSG00000100991.11	35008747:35010187:clu_28231	2.3e-16	-0.92	Prostate
ENSG00000100991.11	TRPC4AP	chr20_34957252_G_A_b38	rs13041792	chr20:35008747:35010187:clu_21370:ENSG00000100991.11	35008747:35010187:clu_21370	4.4e-13	-0.89	Brain - Putamen (basal ganglia)
ENSG00000100991.11	TRPC4AP	chr20_34957252_G_A_b38	rs13041792	chr20:35013066:35016008:clu_31301:ENSG00000100991.11	35013066:35016008:clu_31301	1.9e-10	0.47	Skin - Sun Exposed (Lower leg)
ENSG00000100991.11	TRPC4AP	chr20_34957252_G_A_b38	rs13041792	chr20:35008747:35010187:clu_24759:ENSG00000100991.11	35008747:35010187:clu_24759	2.4e-10	-0.67	Minor Salivary Gland
ENSG00000100991.11	TRPC4AP	chr20_34957252_G_A_b38	rs13041792	chr20:35013066:35016008:clu_30499:ENSG00000100991.11	35013066:35016008:clu_30499	7.4e-09	0.43	Adipose - Subcutaneous
ENSG00000100991.11	TRPC4AP	chr20_34957252_G_A_b38	rs13041792	chr20:35008747:35010187:clu_23782:ENSG00000100991.11	35008747:35010187:clu_23782	4.2e-08	-0.67	Brain - Caudate (basal ganglia)
ENSG00000100983.9	GSS	chr20_34957252_G_A_b38	rs13041792	chr20:34929237:34929401:clu_52692:ENSG00000100983.9	34929237:34929401:clu_52692	1.6e-07	-0.52	Testis
ENSG00000101019.21	UQCC1	chr20_34957252_G_A_b38	rs13041792	chr20:35384133:35386277:clu_26967:ENSG00000101019.21	35384133:35386277:clu_26967	4e-07	0.29	Muscle - Skeletal
ENSG00000100991.11	TRPC4AP	chr20_34957252_G_A_b38	rs13041792	chr20:35008747:35010187:clu_21720:ENSG00000100991.11	35008747:35010187:clu_21720	4.7e-07	-0.71	Brain - Hippocampus
ENSG00000125970.11	RALY	chr20_34957252_G_A_b38	rs13041792	chr20:34065160:34072066:clu_31418:ENSG00000125970.11	34065160:34072066:clu_31418	6e-07	0.4	Nerve - Tibial
ENSG00000125970.11	RALY	chr20_34957252_G_A_b38	rs13041792	chr20:34065160:34072066:clu_32062:ENSG00000125970.11	34065160:34072066:clu_32062	1e-06	0.38	Lung
ENSG00000100983.9	GSS	chr20_34957252_G_A_b38	rs13041792	chr20:34928951:34929401:clu_28144:ENSG00000100983.9	34928951:34929401:clu_28144	1.2e-06	0.39	Esophagus - Muscularis
ENSG00000125970.11	RALY	chr20_34957252_G_A_b38	rs13041792	chr20:34065160:34072066:clu_32587:ENSG00000125970.11	34065160:34072066:clu_32587	2.8e-06	0.34	Thyroid
ENSG00000125970.11	RALY	chr20_34957252_G_A_b38	rs13041792	chr20:34065160:34072066:clu_24299:ENSG00000125970.11	34065160:34072066:clu_24299	2.8e-06	0.33	Cells - Cultured fibroblasts
ENSG00000101000.5	PROCR	chr20_34957252_G_A_b38	rs13041792	chr20:35176446:35176698:clu_30509:ENSG00000101000.5	35176446:35176698:clu_30509	3.8e-05	0.3	Adipose - Subcutaneous
ENSG00000101000.5	PROCR	chr20_34957252_G_A_b38	rs13041792	chr20:35176446:35176698:clu_31494:ENSG00000101000.5	35176446:35176698:clu_31494	8.9e-05	0.32	Nerve - Tibial
ENSG00000101000.5	PROCR	chr20_34957252_G_A_b38	rs13041792	chr20:35176446:35176698:clu_28060:ENSG00000101000.5	35176446:35176698:clu_28060	0.00011	0.29	Artery - Tibial

## Sheet: rs1801310-sQTL
Gencode Id	Gene Symbol	Variant Id	SNP Id	Phenotype Id	Intron Id	P-Value	NES	Tissue
ENSG00000100983.9	GSS	chr20_34929211_A_G_b38	rs1801310	chr20:34929237:34929401:clu_52692:ENSG00000100983.9	34929237:34929401:clu_52692	2.8e-23	-0.71	Testis
ENSG00000131069.19	ACSS2	chr20_34929211_A_G_b38	rs1801310	chr20:34921600:34923323:clu_32098:ENSG00000131069.19	34921600:34923323:clu_32098	1.7e-19	-0.38	Lung
ENSG00000131069.19	ACSS2	chr20_34929211_A_G_b38	rs1801310	chr20:34921600:34923323:clu_30559:ENSG00000131069.19	34921600:34923323:clu_30559	1.4e-17	-0.49	Skin - Not Sun Exposed (Suprapubic)
ENSG00000100991.11	TRPC4AP	chr20_34929211_A_G_b38	rs1801310	chr20:35013066:35016008:clu_30499:ENSG00000100991.11	35013066:35016008:clu_30499	5.5e-17	-0.51	Adipose - Subcutaneous
ENSG00000100991.11	TRPC4AP	chr20_34929211_A_G_b38	rs1801310	chr20:35013066:35016008:clu_31301:ENSG00000100991.11	35013066:35016008:clu_31301	6.1e-16	-0.48	Skin - Sun Exposed (Lower leg)
ENSG00000100983.9	GSS	chr20_34929211_A_G_b38	rs1801310	chr20:34928951:34929401:clu_26919:ENSG00000100983.9	34928951:34929401:clu_26919	1e-15	0.45	Muscle - Skeletal
ENSG00000100991.11	TRPC4AP	chr20_34929211_A_G_b38	rs1801310	chr20:35013066:35016008:clu_30898:ENSG00000100991.11	35013066:35016008:clu_30898	7.4e-15	-0.58	Breast - Mammary Tissue
ENSG00000100991.11	TRPC4AP	chr20_34929211_A_G_b38	rs1801310	chr20:35013066:35016008:clu_52733:ENSG00000100991.11	35013066:35016008:clu_52733	1.3e-14	-0.61	Testis
ENSG00000101460.12	MAP1LC3A	chr20_34929211_A_G_b38	rs1801310	chr20:34550029:34559208:clu_26296:ENSG00000101460.12	34550029:34559208:clu_26296	7.2e-14	0.68	Brain - Cerebellum
ENSG00000100991.11	TRPC4AP	chr20_34929211_A_G_b38	rs1801310	chr20:35013066:35016008:clu_29693:ENSG00000100991.11	35013066:35016008:clu_29693	8.2e-14	-0.46	Adipose - Visceral (Omentum)
ENSG00000131069.19	ACSS2	chr20_34929211_A_G_b38	rs1801310	chr20:34921600:34923323:clu_31280:ENSG00000131069.19	34921600:34923323:clu_31280	1.1e-13	-0.35	Skin - Sun Exposed (Lower leg)
ENSG00000101460.12	MAP1LC3A	chr20_34929211_A_G_b38	rs1801310	chr20:34546916:34549905:clu_25145:ENSG00000101460.12	34546916:34549905:clu_25145	2.1e-12	0.67	Brain - Cerebellar Hemisphere
ENSG00000078747.14	ITCH	chr20_34929211_A_G_b38	rs1801310	chr20:34424525:34438474:clu_52650:ENSG00000078747.14	34424525:34438474:clu_52650	4.2e-12	0.41	Testis
ENSG00000078747.14	ITCH	chr20_34929211_A_G_b38	rs1801310	chr20:34424525:34438474:clu_52650:ENSG00000078747.14	34424525:34438474:clu_52650	4.2e-12	0.41	Testis
ENSG00000100983.9	GSS	chr20_34929211_A_G_b38	rs1801310	chr20:34928951:34929401:clu_30561:ENSG00000100983.9	34928951:34929401:clu_30561	2.2e-11	0.42	Skin - Not Sun Exposed (Suprapubic)
ENSG00000100991.11	TRPC4AP	chr20_34929211_A_G_b38	rs1801310	chr20:35008747:35010187:clu_31486:ENSG00000100991.11	35008747:35010187:clu_31486	6.3e-11	-0.36	Nerve - Tibial
ENSG00000100991.11	TRPC4AP	chr20_34929211_A_G_b38	rs1801310	chr20:35008747:35010187:clu_31486:ENSG00000100991.11	35008747:35010187:clu_31486	6.3e-11	-0.36	Nerve - Tibial
ENSG00000100991.11	TRPC4AP	chr20_34929211_A_G_b38	rs1801310	chr20:35008747:35010187:clu_32656:ENSG00000100991.11	35008747:35010187:clu_32656	3.8e-10	-0.29	Thyroid
ENSG00000100991.11	TRPC4AP	chr20_34929211_A_G_b38	rs1801310	chr20:35008747:35010187:clu_32656:ENSG00000100991.11	35008747:35010187:clu_32656	3.8e-10	-0.29	Thyroid
ENSG00000100983.9	GSS	chr20_34929211_A_G_b38	rs1801310	chr20:34928951:34929401:clu_32100:ENSG00000100983.9	34928951:34929401:clu_32100	8.8e-10	0.37	Lung
ENSG00000078814.15	MYH7B	chr20_34929211_A_G_b38	rs1801310	chr20:34987287:34987557:clu_52706:ENSG00000078814.15	34987287:34987557:clu_52706	1.6e-09	-0.49	Testis
ENSG00000100983.9	GSS	chr20_34929211_A_G_b38	rs1801310	chr20:34928951:34929401:clu_31282:ENSG00000100983.9	34928951:34929401:clu_31282	7.6e-09	0.31	Skin - Sun Exposed (Lower leg)
ENSG00000100991.11	TRPC4AP	chr20_34929211_A_G_b38	rs1801310	chr20:35013066:35016008:clu_24669:ENSG00000100991.11	35013066:35016008:clu_24669	4.2e-08	-0.44	Pancreas
ENSG00000100991.11	TRPC4AP	chr20_34929211_A_G_b38	rs1801310	chr20:35013066:35016008:clu_24669:ENSG00000100991.11	35013066:35016008:clu_24669	4.2e-08	-0.44	Pancreas
ENSG00000100991.11	TRPC4AP	chr20_34929211_A_G_b38	rs1801310	chr20:35013066:35016008:clu_26659:ENSG00000100991.11	35013066:35016008:clu_26659	4.8e-08	-0.56	Spleen
ENSG00000100991.11	TRPC4AP	chr20_34929211_A_G_b38	rs1801310	chr20:35013066:35016008:clu_24265:ENSG00000100991.11	35013066:35016008:clu_24265	8.5e-08	-0.39	Heart - Left Ventricle
ENSG00000101464.10	PIGU	chr20_34929211_A_G_b38	rs1801310	chr20:34579393:34581548:clu_52665:ENSG00000101464.10	34579393:34581548:clu_52665	1.5e-07	-0.41	Testis
ENSG00000131069.19	ACSS2	chr20_34929211_A_G_b38	rs1801310	chr20:34914437:34919435:clu_26917:ENSG00000131069.19	34914437:34919435:clu_26917	2.2e-07	0.14	Muscle - Skeletal
ENSG00000100991.11	TRPC4AP	chr20_34929211_A_G_b38	rs1801310	chr20:35009178:35010187:clu_32118:ENSG00000100991.11	35009178:35010187:clu_32118	2.7e-07	0.23	Lung
ENSG00000100991.11	TRPC4AP	chr20_34929211_A_G_b38	rs1801310	chr20:35009178:35010187:clu_32118:ENSG00000100991.11	35009178:35010187:clu_32118	2.7e-07	0.23	Lung
ENSG00000100983.9	GSS	chr20_34929211_A_G_b38	rs1801310	chr20:34928951:34929401:clu_28144:ENSG00000100983.9	34928951:34929401:clu_28144	3.1e-07	0.34	Esophagus - Muscularis
ENSG00000131069.19	ACSS2	chr20_34929211_A_G_b38	rs1801310	chr20:34921866:34923323:clu_27410:ENSG00000131069.19	34921866:34923323:clu_27410	4.7e-07	0.52	Small Intestine - Terminal Ileum
ENSG00000100991.11	TRPC4AP	chr20_34929211_A_G_b38	rs1801310	chr20:35008747:35010187:clu_27593:ENSG00000100991.11	35008747:35010187:clu_27593	5e-07	-0.34	Colon - Sigmoid
ENSG00000078814.15	MYH7B	chr20_34929211_A_G_b38	rs1801310	chr20:34991121:34993102:clu_24245:ENSG00000078814.15	34991121:34993102:clu_24245	5.7e-07	-0.25	Heart - Left Ventricle
ENSG00000100991.11	TRPC4AP	chr20_34929211_A_G_b38	rs1801310	chr20:35008747:35010187:clu_28049:ENSG00000100991.11	35008747:35010187:clu_28049	5.8e-07	-0.28	Artery - Tibial
ENSG00000100991.11	TRPC4AP	chr20_34929211_A_G_b38	rs1801310	chr20:35008747:35010187:clu_28049:ENSG00000100991.11	35008747:35010187:clu_28049	5.8e-07	-0.28	Artery - Tibial
ENSG00000101019.21	UQCC1	chr20_34929211_A_G_b38	rs1801310	chr20:35384133:35386277:clu_26967:ENSG00000101019.21	35384133:35386277:clu_26967	1.9e-06	0.22	Muscle - Skeletal
ENSG00000131069.19	ACSS2	chr20_34929211_A_G_b38	rs1801310	chr20:34921866:34923323:clu_29777:ENSG00000131069.19	34921866:34923323:clu_29777	2.4e-06	0.28	Colon - Transverse
ENSG00000101460.12	MAP1LC3A	chr20_34929211_A_G_b38	rs1801310	chr20:34546916:34559208:clu_29754:ENSG00000101460.12	34546916:34559208:clu_29754	2.5e-06	-0.23	Colon - Transverse
ENSG00000100983.9	GSS	chr20_34929211_A_G_b38	rs1801310	chr20:34928951:34931336:clu_24338:ENSG00000100983.9	34928951:34931336:clu_24338	2.7e-06	0.3	Cells - Cultured fibroblasts
ENSG00000100991.11	TRPC4AP	chr20_34929211_A_G_b38	rs1801310	chr20:35021332:35035123:clu_24347:ENSG00000100991.11	35021332:35035123:clu_24347	2.8e-06	-0.31	Cells - Cultured fibroblasts
ENSG00000101000.5	PROCR	chr20_34929211_A_G_b38	rs1801310	chr20:35176446:35176698:clu_31310:ENSG00000101000.5	35176446:35176698:clu_31310	4.6e-06	-0.28	Skin - Sun Exposed (Lower leg)
ENSG00000131067.16	GGT7	chr20_34929211_A_G_b38	rs1801310	chr20:34863548:34863680:clu_26913:ENSG00000131067.16	34863548:34863680:clu_26913	5.1e-06	0.22	Muscle - Skeletal
ENSG00000131067.16	GGT7	chr20_34929211_A_G_b38	rs1801310	chr20:34863548:34863680:clu_26913:ENSG00000131067.16	34863548:34863680:clu_26913	5.1e-06	0.22	Muscle - Skeletal
ENSG00000100991.11	TRPC4AP	chr20_34929211_A_G_b38	rs1801310	chr20:35013066:35016008:clu_26950:ENSG00000100991.11	35013066:35016008:clu_26950	5.5e-06	-0.36	Esophagus - Gastroesophageal Junction
ENSG00000100983.9	GSS	chr20_34929211_A_G_b38	rs1801310	chr20:34928951:34929401:clu_30478:ENSG00000100983.9	34928951:34929401:clu_30478	5.9e-06	0.26	Adipose - Subcutaneous
ENSG00000101464.10	PIGU	chr20_34929211_A_G_b38	rs1801310	chr20:34575246:34588453:clu_21728:ENSG00000101464.10	34575246:34588453:clu_21728	6.4e-06	-0.61	Cells - EBV-transformed lymphocytes
ENSG00000101000.5	PROCR	chr20_34929211_A_G_b38	rs1801310	chr20:35176446:35176698:clu_30509:ENSG00000101000.5	35176446:35176698:clu_30509	2e-05	-0.26	Adipose - Subcutaneous
ENSG00000101000.5	PROCR	chr20_34929211_A_G_b38	rs1801310	chr20:35176446:35176698:clu_24351:ENSG00000101000.5	35176446:35176698:clu_24351	0.00011	-0.25	Cells - Cultured fibroblasts

## Sheet: rs6088660-sQTL
Gencode Id	Gene Symbol	Variant Id	SNP Id	Phenotype Id	Intron Id	P-Value	NES	Tissue
ENSG00000100991.11	TRPC4AP	chr20_34955093_C_T_b38	rs6088660	chr20:35013066:35016008:clu_30499:ENSG00000100991.11	35013066:35016008:clu_30499	4.9e-88	-1.1	Adipose - Subcutaneous
ENSG00000100991.11	TRPC4AP	chr20_34955093_C_T_b38	rs6088660	chr20:35013066:35016008:clu_31301:ENSG00000100991.11	35013066:35016008:clu_31301	2.7e-78	-1.1	Skin - Sun Exposed (Lower leg)
ENSG00000100991.11	TRPC4AP	chr20_34955093_C_T_b38	rs6088660	chr20:35013066:35016008:clu_30898:ENSG00000100991.11	35013066:35016008:clu_30898	2.5e-54	-1.1	Breast - Mammary Tissue
ENSG00000100991.11	TRPC4AP	chr20_34955093_C_T_b38	rs6088660	chr20:35021332:35035123:clu_24347:ENSG00000100991.11	35021332:35035123:clu_24347	3.2e-49	-0.95	Cells - Cultured fibroblasts
ENSG00000100991.11	TRPC4AP	chr20_34955093_C_T_b38	rs6088660	chr20:35013066:35016008:clu_52733:ENSG00000100991.11	35013066:35016008:clu_52733	4.6e-47	-1.1	Testis
ENSG00000100991.11	TRPC4AP	chr20_34955093_C_T_b38	rs6088660	chr20:35013066:35016008:clu_29693:ENSG00000100991.11	35013066:35016008:clu_29693	2e-40	-0.78	Adipose - Visceral (Omentum)
ENSG00000100991.11	TRPC4AP	chr20_34955093_C_T_b38	rs6088660	chr20:35013066:35016008:clu_24669:ENSG00000100991.11	35013066:35016008:clu_24669	1.5e-31	-0.89	Pancreas
ENSG00000100991.11	TRPC4AP	chr20_34955093_C_T_b38	rs6088660	chr20:35013066:35016008:clu_24669:ENSG00000100991.11	35013066:35016008:clu_24669	1.5e-31	-0.89	Pancreas
ENSG00000100991.11	TRPC4AP	chr20_34955093_C_T_b38	rs6088660	chr20:35013066:35016008:clu_26659:ENSG00000100991.11	35013066:35016008:clu_26659	4e-28	-1	Spleen
ENSG00000078814.15	MYH7B	chr20_34955093_C_T_b38	rs6088660	chr20:34991121:34993102:clu_24245:ENSG00000078814.15	34991121:34993102:clu_24245	2.7e-27	-0.53	Heart - Left Ventricle
ENSG00000078814.15	MYH7B	chr20_34955093_C_T_b38	rs6088660	chr20:34987287:34987557:clu_52706:ENSG00000078814.15	34987287:34987557:clu_52706	6.8e-26	-0.89	Testis
ENSG00000100991.11	TRPC4AP	chr20_34955093_C_T_b38	rs6088660	chr20:35013066:35016008:clu_21761:ENSG00000100991.11	35013066:35016008:clu_21761	5.1e-20	-1	Cells - EBV-transformed lymphocytes
ENSG00000100991.11	TRPC4AP	chr20_34955093_C_T_b38	rs6088660	chr20:35013066:35016008:clu_24454:ENSG00000100991.11	35013066:35016008:clu_24454	9.2e-20	-0.85	Adrenal Gland
ENSG00000100991.11	TRPC4AP	chr20_34955093_C_T_b38	rs6088660	chr20:35013066:35016008:clu_26827:ENSG00000100991.11	35013066:35016008:clu_26827	1.9e-19	-0.63	Heart - Atrial Appendage
ENSG00000100991.11	TRPC4AP	chr20_34955093_C_T_b38	rs6088660	chr20:35021332:35035123:clu_28426:ENSG00000100991.11	35021332:35035123:clu_28426	9.7e-18	-0.54	Esophagus - Mucosa
ENSG00000100991.11	TRPC4AP	chr20_34955093_C_T_b38	rs6088660	chr20:35013066:35016008:clu_24265:ENSG00000100991.11	35013066:35016008:clu_24265	1.6e-17	-0.62	Heart - Left Ventricle
ENSG00000100991.11	TRPC4AP	chr20_34955093_C_T_b38	rs6088660	chr20:35013066:35016008:clu_21191:ENSG00000100991.11	35013066:35016008:clu_21191	3.5e-17	-0.72	Liver
ENSG00000100991.11	TRPC4AP	chr20_34955093_C_T_b38	rs6088660	chr20:35013066:35016008:clu_27429:ENSG00000100991.11	35013066:35016008:clu_27429	3.5e-17	-0.92	Small Intestine - Terminal Ileum
ENSG00000100991.11	TRPC4AP	chr20_34955093_C_T_b38	rs6088660	chr20:35013066:35016008:clu_29183:ENSG00000100991.11	35013066:35016008:clu_29183	4.2e-17	-0.79	Pituitary
ENSG00000100991.11	TRPC4AP	chr20_34955093_C_T_b38	rs6088660	chr20:35013066:35016008:clu_29183:ENSG00000100991.11	35013066:35016008:clu_29183	4.2e-17	-0.79	Pituitary
ENSG00000100991.11	TRPC4AP	chr20_34955093_C_T_b38	rs6088660	chr20:35013066:35016008:clu_26950:ENSG00000100991.11	35013066:35016008:clu_26950	6.1e-16	-0.62	Esophagus - Gastroesophageal Junction
ENSG00000100991.11	TRPC4AP	chr20_34955093_C_T_b38	rs6088660	chr20:35013066:35016008:clu_25416:ENSG00000100991.11	35013066:35016008:clu_25416	1e-15	-0.74	Artery - Coronary
ENSG00000100991.11	TRPC4AP	chr20_34955093_C_T_b38	rs6088660	chr20:35013066:35016008:clu_24739:ENSG00000100991.11	35013066:35016008:clu_24739	1.3e-15	-0.92	Ovary
ENSG00000100991.11	TRPC4AP	chr20_34955093_C_T_b38	rs6088660	chr20:35013066:35016008:clu_24739:ENSG00000100991.11	35013066:35016008:clu_24739	1.3e-15	-0.92	Ovary
ENSG00000078814.15	MYH7B	chr20_34955093_C_T_b38	rs6088660	chr20:34991121:34993102:clu_26806:ENSG00000078814.15	34991121:34993102:clu_26806	2.3e-12	-0.44	Heart - Atrial Appendage
ENSG00000100991.11	TRPC4AP	chr20_34955093_C_T_b38	rs6088660	chr20:35021332:35035123:clu_26953:ENSG00000100991.11	35021332:35035123:clu_26953	2.4e-12	-0.27	Muscle - Skeletal
ENSG00000100991.11	TRPC4AP	chr20_34955093_C_T_b38	rs6088660	chr20:35021332:35035123:clu_29797:ENSG00000100991.11	35021332:35035123:clu_29797	4.8e-12	-0.46	Colon - Transverse
ENSG00000100991.11	TRPC4AP	chr20_34955093_C_T_b38	rs6088660	chr20:35013066:35016008:clu_23324:ENSG00000100991.11	35013066:35016008:clu_23324	7.4e-10	-0.91	Uterus
ENSG00000100991.11	TRPC4AP	chr20_34955093_C_T_b38	rs6088660	chr20:35021332:35035123:clu_27469:ENSG00000100991.11	35021332:35035123:clu_27469	1.9e-09	-0.41	Stomach
ENSG00000100991.11	TRPC4AP	chr20_34955093_C_T_b38	rs6088660	chr20:35013066:35016008:clu_18203:ENSG00000100991.11	35013066:35016008:clu_18203	1.2e-08	-0.94	Kidney - Cortex
ENSG00000100983.9	GSS	chr20_34955093_C_T_b38	rs6088660	chr20:34929237:34929401:clu_52692:ENSG00000100983.9	34929237:34929401:clu_52692	7.1e-08	-0.45	Testis
ENSG00000100991.11	TRPC4AP	chr20_34955093_C_T_b38	rs6088660	chr20:35013066:35016008:clu_24572:ENSG00000100991.11	35013066:35016008:clu_24572	2.7e-07	-0.68	Vagina
ENSG00000131069.19	ACSS2	chr20_34955093_C_T_b38	rs6088660	chr20:34921600:34923323:clu_30559:ENSG00000131069.19	34921600:34923323:clu_30559	4.8e-07	-0.3	Skin - Not Sun Exposed (Suprapubic)
ENSG00000101000.5	PROCR	chr20_34955093_C_T_b38	rs6088660	chr20:35176446:35176698:clu_28172:ENSG00000101000.5	35176446:35176698:clu_28172	5e-07	0.36	Esophagus - Muscularis
ENSG00000101000.5	PROCR	chr20_34955093_C_T_b38	rs6088660	chr20:35176446:35176698:clu_26961:ENSG00000101000.5	35176446:35176698:clu_26961	7.1e-07	0.3	Muscle - Skeletal
ENSG00000101000.5	PROCR	chr20_34955093_C_T_b38	rs6088660	chr20:35176446:35176698:clu_26961:ENSG00000101000.5	35176446:35176698:clu_26961	8.5e-07	0.44	Esophagus - Gastroesophageal Junction
ENSG00000101000.5	PROCR	chr20_34955093_C_T_b38	rs6088660	chr20:35176446:35176698:clu_31494:ENSG00000101000.5	35176446:35176698:clu_31494	2.3e-06	0.34	Nerve - Tibial
ENSG00000100991.11	TRPC4AP	chr20_34955093_C_T_b38	rs6088660	chr20:35021332:35035123:clu_26340:ENSG00000100991.11	35021332:35035123:clu_26340	2.8e-06	-0.43	Brain - Cerebellum
ENSG00000100991.11	TRPC4AP	chr20_34955093_C_T_b38	rs6088660	chr20:35021356:35035123:clu_25192:ENSG00000100991.11	35021356:35035123:clu_25192	3.9e-06	0.48	Brain - Cerebellar Hemisphere
ENSG00000100991.11	TRPC4AP	chr20_34955093_C_T_b38	rs6088660	chr20:35008747:35010187:clu_30577:ENSG00000100991.11	35008747:35010187:clu_30577	6.5e-06	0.27	Skin - Not Sun Exposed (Suprapubic)
ENSG00000101000.5	PROCR	chr20_34955093_C_T_b38	rs6088660	chr20:35176446:35176698:clu_28060:ENSG00000101000.5	35176446:35176698:clu_28060	1e-05	0.29	Artery - Tibial
ENSG00000101000.5	PROCR	chr20_34955093_C_T_b38	rs6088660	chr20:35176446:35176698:clu_30509:ENSG00000101000.5	35176446:35176698:clu_30509	2.4e-05	0.28	Adipose - Subcutaneous
ENSG00000101000.5	PROCR	chr20_34955093_C_T_b38	rs6088660	chr20:35176446:35176698:clu_32128:ENSG00000101000.5	35176446:35176698:clu_32128	3.5e-05	0.28	Lung
ENSG00000101000.5	PROCR	chr20_34955093_C_T_b38	rs6088660	chr20:35176446:35176698:clu_29804:ENSG00000101000.5	35176446:35176698:clu_29804	4.3e-05	0.34	Colon - Transverse
ENSG00000101000.5	PROCR	chr20_34955093_C_T_b38	rs6088660	chr20:35176446:35176698:clu_28433:ENSG00000101000.5	35176446:35176698:clu_28433	0.00013	0.26	Esophagus - Mucosa
ENSG00000101000.5	PROCR	chr20_34955093_C_T_b38	rs6088660	chr20:35176446:35176698:clu_24351:ENSG00000101000.5	35176446:35176698:clu_24351	0.00018	0.26	Cells - Cultured fibroblasts

## Sheet: rs6119534-sQTL
Gencode Id	Gene Symbol	Variant Id	SNP Id	Phenotype Id	Intron Id	P-Value	NES	Tissue
ENSG00000100991.11	TRPC4AP	chr20_34853454_C_T_b38	rs6119534	chr20:35008747:35010187:clu_32656:ENSG00000100991.11	35008747:35010187:clu_32656	1.9e-15	-0.36	Thyroid
ENSG00000100991.11	TRPC4AP	chr20_34853454_C_T_b38	rs6119534	chr20:35008747:35010187:clu_32656:ENSG00000100991.11	35008747:35010187:clu_32656	1.9e-15	-0.36	Thyroid
ENSG00000100991.11	TRPC4AP	chr20_34853454_C_T_b38	rs6119534	chr20:35008747:35010187:clu_31486:ENSG00000100991.11	35008747:35010187:clu_31486	1.3e-13	-0.39	Nerve - Tibial
ENSG00000100991.11	TRPC4AP	chr20_34853454_C_T_b38	rs6119534	chr20:35008747:35010187:clu_31486:ENSG00000100991.11	35008747:35010187:clu_31486	1.3e-13	-0.39	Nerve - Tibial
ENSG00000100991.11	TRPC4AP	chr20_34853454_C_T_b38	rs6119534	chr20:35009178:35010187:clu_32118:ENSG00000100991.11	35009178:35010187:clu_32118	2.2e-13	0.33	Lung
ENSG00000100991.11	TRPC4AP	chr20_34853454_C_T_b38	rs6119534	chr20:35009178:35010187:clu_32118:ENSG00000100991.11	35009178:35010187:clu_32118	2.2e-13	0.33	Lung
ENSG00000078747.14	ITCH	chr20_34853454_C_T_b38	rs6119534	chr20:34424525:34438474:clu_52650:ENSG00000078747.14	34424525:34438474:clu_52650	2.8e-13	0.44	Testis
ENSG00000078747.14	ITCH	chr20_34853454_C_T_b38	rs6119534	chr20:34424525:34438474:clu_52650:ENSG00000078747.14	34424525:34438474:clu_52650	2.8e-13	0.44	Testis
ENSG00000100983.9	GSS	chr20_34853454_C_T_b38	rs6119534	chr20:34929237:34929401:clu_52692:ENSG00000100983.9	34929237:34929401:clu_52692	3.3e-12	-0.53	Testis
ENSG00000100991.11	TRPC4AP	chr20_34853454_C_T_b38	rs6119534	chr20:35008747:35010187:clu_28049:ENSG00000100991.11	35008747:35010187:clu_28049	1.8e-11	-0.36	Artery - Tibial
ENSG00000100991.11	TRPC4AP	chr20_34853454_C_T_b38	rs6119534	chr20:35008747:35010187:clu_28049:ENSG00000100991.11	35008747:35010187:clu_28049	1.8e-11	-0.36	Artery - Tibial
ENSG00000100991.11	TRPC4AP	chr20_34853454_C_T_b38	rs6119534	chr20:35008747:35010187:clu_27593:ENSG00000100991.11	35008747:35010187:clu_27593	7.2e-11	-0.43	Colon - Sigmoid
ENSG00000100991.11	TRPC4AP	chr20_34853454_C_T_b38	rs6119534	chr20:35008747:35010187:clu_30577:ENSG00000100991.11	35008747:35010187:clu_30577	1e-10	-0.36	Skin - Not Sun Exposed (Suprapubic)
ENSG00000100983.9	GSS	chr20_34853454_C_T_b38	rs6119534	chr20:34928951:34929401:clu_26919:ENSG00000100983.9	34928951:34929401:clu_26919	2.5e-10	0.36	Muscle - Skeletal
ENSG00000131069.19	ACSS2	chr20_34853454_C_T_b38	rs6119534	chr20:34921600:34923323:clu_30559:ENSG00000131069.19	34921600:34923323:clu_30559	6.8e-10	-0.35	Skin - Not Sun Exposed (Suprapubic)
ENSG00000101460.12	MAP1LC3A	chr20_34853454_C_T_b38	rs6119534	chr20:34550029:34559208:clu_26296:ENSG00000101460.12	34550029:34559208:clu_26296	1.3e-09	0.55	Brain - Cerebellum
ENSG00000125971.16	DYNLRB1	chr20_34853454_C_T_b38	rs6119534	chr20:34530234:34534628:clu_52656:ENSG00000125971.16	34530234:34534628:clu_52656	1.7e-09	0.46	Testis
ENSG00000131069.19	ACSS2	chr20_34853454_C_T_b38	rs6119534	chr20:34921600:34923323:clu_32098:ENSG00000131069.19	34921600:34923323:clu_32098	3.8e-09	-0.25	Lung
ENSG00000100991.11	TRPC4AP	chr20_34853454_C_T_b38	rs6119534	chr20:35008747:35010187:clu_28162:ENSG00000100991.11	35008747:35010187:clu_28162	7e-09	-0.31	Esophagus - Muscularis
ENSG00000100983.9	GSS	chr20_34853454_C_T_b38	rs6119534	chr20:34928951:34929401:clu_30561:ENSG00000100983.9	34928951:34929401:clu_30561	1.1e-07	0.33	Skin - Not Sun Exposed (Suprapubic)
ENSG00000100983.9	GSS	chr20_34853454_C_T_b38	rs6119534	chr20:34928951:34929401:clu_28144:ENSG00000100983.9	34928951:34929401:clu_28144	1.2e-07	0.34	Esophagus - Muscularis
ENSG00000078814.15	MYH7B	chr20_34853454_C_T_b38	rs6119534	chr20:34987287:34987557:clu_52706:ENSG00000078814.15	34987287:34987557:clu_52706	1.3e-07	-0.44	Testis
ENSG00000100983.9	GSS	chr20_34853454_C_T_b38	rs6119534	chr20:34928951:34929401:clu_32100:ENSG00000100983.9	34928951:34929401:clu_32100	1.4e-07	0.32	Lung
ENSG00000100991.11	TRPC4AP	chr20_34853454_C_T_b38	rs6119534	chr20:35013066:35016008:clu_30499:ENSG00000100991.11	35013066:35016008:clu_30499	3.1e-07	-0.32	Adipose - Subcutaneous
ENSG00000125971.16	DYNLRB1	chr20_34853454_C_T_b38	rs6119534	chr20:34526149:34526268:clu_31431:ENSG00000125971.16	34526149:34526268:clu_31431	5.4e-07	0.26	Nerve - Tibial
ENSG00000100991.11	TRPC4AP	chr20_34853454_C_T_b38	rs6119534	chr20:35013066:35016008:clu_52733:ENSG00000100991.11	35013066:35016008:clu_52733	6.8e-07	-0.42	Testis
ENSG00000100983.9	GSS	chr20_34853454_C_T_b38	rs6119534	chr20:34928951:34929401:clu_31282:ENSG00000100983.9	34928951:34929401:clu_31282	1e-06	0.27	Skin - Sun Exposed (Lower leg)
ENSG00000100983.9	GSS	chr20_34853454_C_T_b38	rs6119534	chr20:34928951:34929401:clu_30478:ENSG00000100983.9	34928951:34929401:clu_30478	1.8e-06	0.28	Adipose - Subcutaneous
ENSG00000100991.11	TRPC4AP	chr20_34853454_C_T_b38	rs6119534	chr20:35013066:35016008:clu_31301:ENSG00000100991.11	35013066:35016008:clu_31301	2.3e-06	-0.29	Skin - Sun Exposed (Lower leg)
ENSG00000131067.16	GGT7	chr20_34853454_C_T_b38	rs6119534	chr20:34863548:34863680:clu_26913:ENSG00000131067.16	34863548:34863680:clu_26913	2.8e-06	0.23	Muscle - Skeletal
ENSG00000131067.16	GGT7	chr20_34853454_C_T_b38	rs6119534	chr20:34863548:34863680:clu_26913:ENSG00000131067.16	34863548:34863680:clu_26913	2.8e-06	0.23	Muscle - Skeletal
ENSG00000125970.11	RALY	chr20_34853454_C_T_b38	rs6119534	chr20:34065160:34072066:clu_32587:ENSG00000125970.11	34065160:34072066:clu_32587	4.1e-06	0.28	Thyroid
ENSG00000100991.11	TRPC4AP	chr20_34853454_C_T_b38	rs6119534	chr20:35013066:35016008:clu_29693:ENSG00000100991.11	35013066:35016008:clu_29693	5.6e-06	-0.28	Adipose - Visceral (Omentum)
ENSG00000125971.16	DYNLRB1	chr20_34853454_C_T_b38	rs6119534	chr20:34519498:34526268:clu_28118:ENSG00000125971.16	34519498:34526268:clu_28118	5.9e-06	-0.28	Esophagus - Muscularis
ENSG00000101000.5	PROCR	chr20_34853454_C_T_b38	rs6119534	chr20:35176446:35176698:clu_28172:ENSG00000101000.5	35176446:35176698:clu_28172	4.6e-05	0.29	Esophagus - Muscularis

[truncated: 2 more sheets: rs11546155-sQTL, Лист1]
