# Supplementary material for: The Link between Type 2 Diabetes Mellitus and the Polymorphisms of Glutathione-Metabolizing Genes Suggests a New Hypothesis Explaining Disease Initiation and Progression
Source: Life (Basel). 2021 Aug 28;11(9):886. doi: 10.3390/life11090886 (PMC8466482; doi:10.3390/life11090886)
Supplement: Supplementary file 1 [file life-11-00886-s001.zip › Suppl Table S6.xlsx]

## Sheet: File description
		Supplementary table 6
		QTL analysis using QTLbase (http://mulinlab.tmu.edu.cn/qtlbase/index.html)
list 1	File description
list 2	rs13041792-eQTL		Expression quantitative trait loci for SNP rs13041792
list 3	rs13041792-mQTL		Methylation quantitative trait loci for SNP rs13041792
list 4	rs1801310-eQTL		Expression quantitative trait loci for SNP rs1801310
list 5	rs1801310-mQTL		Methylation quantitative trait loci for SNP rs1801310
list 6	rs1801310-hQTL		Histone modification quantitative trait loci for SNP rs1801310
list 7	rs6088660-eQTL		Expression quantitative trait loci for SNP rs6088660
list 8	rs6088660-mQTL		Methylation quantitative trait loci for SNP rs6088660
list 9	rs6088660-sQTL		Splicing quantitative trait loci for SNP rs6088660
list 10	rs11546155-eQTL		Expression quantitative trait loci for SNP rs11546155
list 11	rs11546155-mQTL		Methylation quantitative trait loci for SNP rs11546155
list 12	rs11546155-hQTL		Histone modification quantitative trait loci for SNP rs11546155
list 13	rs6119534-eQTL		Expression quantitative trait loci for SNP rs6119534
list 14	rs6119534-mQTL		Methylation quantitative trait loci for SNP rs6119534
list 15	rs6119534-hQTL		Histone modification quantitative trait loci for SNP rs6119534
	*QTLs in the pancreas are highlighted by yellow

## Sheet: rs13041792-eQTL
Trait	CHR	START	END	Effective_Allele	tissue	Tissue_State	xqtl	Effect_Size	Effect_Size_Desc	SE	SE_Desc	PVAL	FDR	PMID	Journal	year	Platform	Population	Sample_Size
TRPC4AP	20	33590207	33680610	A	Blood	normal	eQTL	NA	NA	NA	Estimated SE	9.81e-198	NA	24013639	Nature genetics	2013	HT12-v3 arrays, HT12-v4 arrays, and HumanRef-8 v2 arrays	MIX	5311
EDEM2	20	33703167	33735139	A	Blood	normal	eQTL	NA	NA	NA	Estimated SE	3.58e-43	NA	24013639	Nature genetics	2013	HT12-v3 arrays, HT12-v4 arrays, and HumanRef-8 v2 arrays	MIX	5311
EDEM2	20	33703167	33735139	G	Blood	normal	eQTL	0.0312586	t-statistic	NA	Estimated SE	7.05e-21	NA	28285768	American journal of human genetics	2017	Affymetrix Human Exon 1.0 ST GeneChip platform	MIX	5257
EDEM2	20	33703167	33735139	G	Blood	normal	eQTL	0.0312586	t-statistic	NA	Estimated SE	7.05e-21	NA	28285768	American journal of human genetics	2017	Affymetrix Human Exon 1.0 ST GeneChip platform	MIX	5257
MAP1LC3A	20	33134658	33148149	NA	Blood	normal	eQTL	0.103698	beta	NA	Estimated SE	4.59e-17	2.02e-14	30545857	Science	2018	RNA-seq	MIX	1866
GGT7	20	33432523	33460659	A	Blood	normal	eQTL	NA	NA	NA	Estimated SE	4.97e-14	NA	24013639	Nature genetics	2013	HT12-v3 arrays, HT12-v4 arrays, and HumanRef-8 v2 arrays	MIX	5311
EDEM2	20	33703167	33735139	NA	Blood	normal	eQTL	-0.165671	beta	0.0229366	Estimated SE	5.1e-13	1.58e-10	30545857	Science	2018	RNA-seq	MIX	1866
GGT7	20	33432523	33460659	A	Liver	normal	eQTL	-7.0587	Z-score	0.999667	Estimated SE	1.68e-12	NA	28248954	PLoS genetics	2017	HumanHT-12v4 BeadChips	EUR	293
NCOA6	20	33276901	33413454	NA	Blood	normal	eQTL	0.103536	beta	0.0166088	Estimated SE	4.56e-10	1.01e-07	30545857	Science	2018	RNA-seq	MIX	1866
ITCH	20	32951041	33099198	G	Blood	normal	eQTL	-0.0111701	t-statistic	0.001835	Estimated SE	1.23e-09	NA	28285768	American journal of human genetics	2017	Affymetrix Human Exon 1.0 ST GeneChip platform	MIX	5257
ITCH	20	32951041	33099198	G	Blood	normal	eQTL	-0.0111701	t-statistic	0.001835	Estimated SE	1.23e-09	NA	28285768	American journal of human genetics	2017	Affymetrix Human Exon 1.0 ST GeneChip platform	MIX	5257
EDEM2	20	33703167	33735139	G	Lymphocyte	normal	eQTL	0.20707	beta	0.035476	Original reported SE	5.32e-09	NA	25951796	Nature communications	2015	Affymetrix HGC U133 Plus 2.0 GeneChip	EUR	368
CPNE1	20	34213953	34252878	G	Blood	normal	eQTL	0.00931875	t-statistic	0.00165055	Estimated SE	1.73e-08	NA	28285768	American journal of human genetics	2017	Affymetrix Human Exon 1.0 ST GeneChip platform	MIX	5257
CPNE1	20	34213953	34252878	G	Blood	normal	eQTL	0.00931875	t-statistic	0.00165055	Estimated SE	1.73e-08	NA	28285768	American journal of human genetics	2017	Affymetrix Human Exon 1.0 ST GeneChip platform	MIX	5257
EDEM2	20	33703167	33735139	NA	Blood	eczema	eQTL	0.299697	beta	0.056945	Original reported SE	1.42e-07	NA	25951796	Nature communications	2015	Affymetrix U133 Plus 2.0 GeneChip	EUR	240
GGT7	20	33432523	33460659	A	Adipose-Visceral	normal	eQTL	-5.16138	Z-score	0.999804	Estimated SE	2.45e-07	0.00611	28248954	PLoS genetics	2017	HumanHT-12v4 BeadChips	EUR	283
EDEM2	20	33703167	33735139	NA	Brain-Prefrontal Cortex	schizophrenia, mood disorder and normal	eQTL	0.0671916	beta	0.0134325	Estimated SE	8.04e-07	0.0001	27668389	Nature neuroscience	2016	HiSeq 2500	EUR	467
PROCR	20	33759875	33804043	NA	Liver	normal	eQTL	0.497738	beta	0.103303	Original reported SE	1.85e-06	0.000957	29650998	Scientific reports	2018	null	EUR	588
GSS	20	33516235	33543830	NA	Blood	normal	eQTL	0.063713	beta	0.013501	Estimated SE	2.37e-06	0.000296	30545857	Science	2018	RNA-seq	MIX	1866
ACSS2	20	33459949	33515765	A	Blood	normal	eQTL	NA	NA	NA	Estimated SE	1.3e-05	NA	24013639	Nature genetics	2013	HT12-v3 arrays, HT12-v4 arrays, and HumanRef-8 v2 arrays	MIX	5311
GSS	20	33516235	33543830	NA	Liver	null	eQTL	0.868769	beta	0.188775	Estimated SE	1.35e-05	0.00883	28388432	Cell stem cell	2017	Illumina HiSeq 2000/2500 systems	MIX	91
TRPC4AP	20	33590207	33680610	A	Liver	normal	eQTL	4.22275	Z-score	1.00003	Estimated SE	2.42e-05	0.202	28248954	PLoS genetics	2017	HumanHT-12v4 BeadChips	EUR	293
MAP1LC3A	20	33134658	33148149	NA	Brain-Prefrontal Cortex	schizophrenia, mood disorder and normal	eQTL	-0.0471132	beta	0.0134064	Estimated SE	0.000484	0.0287	27668389	Nature neuroscience	2016	HiSeq 2500	EUR	467
RP3-477O4.16	20	34106682	34107108	NA	Blood	normal	eQTL	0.126545	beta	0.0377582	Estimated SE	0.000804	0.0486	30545857	Science	2018	RNA-seq	MIX	1866
AL031668.1	20	32602775	32605555	NA	Brain	normal	eQTL	-0.307659	beta	0.112528	Estimated SE	0.00749	0.908	30224808	Nature neuroscience	2018	Illumina HiSeq 2000 and 2500	MIX	93
PROCR	20	33759875	33804043	NA	Kidney	nephrotic syndrome	eQTL	0.331267	beta	0.124255	Original reported SE	0.00863	NA	30057032	American journal of human genetics	2018	Affymetrix 2.1 ST chips	MIX	166
GSS	20	33516235	33543830	A	Blood-T cell CD8+	normal	eQTL	2.19962	Z-score	0.968765	Estimated SE	0.0278	0.947	29610479	Nature genetics	2018	Illumina HiSeq4000	EUR	45
TRPC4AP	20	33590207	33680610	A	Blood-B cell	normal	eQTL	2.18543	Z-score	0.969584	Estimated SE	0.0289	0.981	29610479	Nature genetics	2018	Illumina HiSeq4000	EUR	45
GGT7	20	33432523	33460659	NA	Kidney	nephrotic syndrome	eQTL	-0.259428	beta	0.122848	Original reported SE	0.0366	NA	30057032	American journal of human genetics	2018	Affymetrix 2.1 ST chips	MIX	166
EDEM2	20	33703167	33735139	NA	Skin	normal	eQTL	0.249318	beta	0.121516	Original reported SE	0.0402	NA	25951796	Nature communications	2015	Affymetrix GeneChip	EUR	110
TP53INP2	20	33292143	33301243	NA	Kidney	nephrotic syndrome	eQTL	0.245394	beta	0.118768	Original reported SE	0.0408	NA	30057032	American journal of human genetics	2018	Affymetrix 2.1 ST chips	MIX	166
GGT7	20	33432523	33460659	A	Blood-T cell CD4+	normal	eQTL	1.97424	Z-score	0.974172	Estimated SE	0.0484	0.939	29610479	Nature genetics	2018	Illumina HiSeq4000	EUR	45
GGT7	20	33432523	33460659	NA	Kidney	nephrotic syndrome	eQTL	-0.256814	beta	0.129226	Original reported SE	0.0497	NA	30057032	American journal of human genetics	2018	Affymetrix 2.1 ST chips	MIX	136

## Sheet: rs13041792-mQTL
Trait	CHR	START	END	Effective_Allele	tissue	Tissue_State	xqtl	Effect_Size	Effect_Size_Desc	SE	SE_Desc	PVAL	FDR	PMID	Journal	year	Platform	Population	Sample_Size
cg24642439 (chr20:33292090)	20	33292090	33292090	A	Breast	Breast invasive carcinoma	mQTL	0.6	beta	NA	Estimated SE	4.52e-23	NA	30203047	Nucleic acids research	2019	Illumina Infinium HumanMethylation450 BeadChip array	MIX	664
cg08999081 (chr20:33150536)	20	33150536	33150536	A	Prostate	Prostate adenocarcinoma	mQTL	0.48	beta	0.0614044	Estimated SE	3.47e-14	NA	30203047	Nucleic acids research	2019	Illumina Infinium HumanMethylation450 BeadChip array	MIX	479
cg27629776 (chr20:33880370)	20	33880370	33880370	NA	Blood	normal	mQTL	0.374286	beta	0.0488153	Estimated SE	4.88e-14	1.96e-08	27036880	Genome biology	2016	Illumina Infinium HumanMethylation450 (HM450) BeadChip	EUR	834
cg24642439 (chr20:33292090)	20	33292090	33292090	A	Liver	Liver hepatocellular carcinoma	mQTL	0.67	beta	0.0859402	Estimated SE	6.67e-14	NA	30203047	Nucleic acids research	2019	Illumina Infinium HumanMethylation450 BeadChip array	MIX	367
cg19481439 (chr20:33451427)	20	33451427	33451427	NA	Blood	normal	mQTL	-0.420163	beta	0.0560862	Estimated SE	1.87e-13	8.72e-08	27036880	Genome biology	2016	Illumina Infinium HumanMethylation450 (HM450) BeadChip	EUR	771
cg24642439 (chr20:33292090)	20	33292090	33292090	A	Stomach	Stomach adenocarcinoma	mQTL	0.68	beta	0.0893215	Estimated SE	2.29e-13	NA	30203047	Nucleic acids research	2019	Illumina Infinium HumanMethylation450 BeadChip array	MIX	367
cg24642439 (chr20:33292090)	20	33292090	33292090	A	Lung	Lung squamous cell carcinoma	mQTL	0.62	beta	0.0873736	Estimated SE	6.9e-12	NA	30203047	Nucleic acids research	2019	Illumina Infinium HumanMethylation450 BeadChip array	MIX	359
cg24642439 (chr20:33292090)	20	33292090	33292090	A	Kidney	Kidney renal papillary cell carcinoma	mQTL	0.7	beta	0.0979687	Estimated SE	8.32e-12	NA	30203047	Nucleic acids research	2019	Illumina Infinium HumanMethylation450 BeadChip array	MIX	271
cg24642439 (chr20:33292090)	20	33292090	33292090	A	Brain	Lower grade glioma	mQTL	0.55	beta	0.0797814	Estimated SE	1.69e-11	NA	30203047	Nucleic acids research	2019	Illumina Infinium HumanMethylation450 BeadChip array	MIX	487
cg24642439 (chr20:33292090)	20	33292090	33292090	A	Bladder	Bladder urothelial carcinoma	mQTL	0.56	beta	0.0827827	Estimated SE	4.69e-11	NA	30203047	Nucleic acids research	2019	Illumina Infinium HumanMethylation450 BeadChip array	MIX	405
cg24642439 (chr20:33292090)	20	33292090	33292090	A	Cervix	Cervical squamous cell carcinoma and endocervical adenocarcinoma	mQTL	0.69	beta	0.101442	Estimated SE	5.9e-11	NA	30203047	Nucleic acids research	2019	Illumina Infinium HumanMethylation450 BeadChip array	MIX	290
cg24642439 (chr20:33292090)	20	33292090	33292090	A	Prostate	Prostate adenocarcinoma	mQTL	0.52	beta	0.0778285	Estimated SE	6.59e-11	NA	30203047	Nucleic acids research	2019	Illumina Infinium HumanMethylation450 BeadChip array	MIX	479
cg08999081 (chr20:33150536)	20	33150536	33150536	NA	Blood	normal	mQTL	0.297537	beta	0.0452706	Estimated SE	8.7e-11	2.54e-05	27036880	Genome biology	2016	Illumina Infinium HumanMethylation450 (HM450) BeadChip	EUR	837
cg08999081 (chr20:33150536)	20	33150536	33150536	NA	Blood	normal	mQTL	0.281801	beta	0.0428272	Estimated SE	8.89e-11	3.13e-05	27036880	Genome biology	2016	Illumina Infinium HumanMethylation450 (HM450) BeadChip	EUR	742
cg21132536 (chr20:33465180)	20	33465180	33465180	NA	Blood	normal	mQTL	0.337561	beta	0.0536868	Estimated SE	5.42e-10	0.000157	27036880	Genome biology	2016	Illumina Infinium HumanMethylation450 (HM450) BeadChip	EUR	764
cg17250863 (chr20:33451272)	20	33451272	33451272	NA	Blood	normal	mQTL	-0.34642	beta	0.0556824	Estimated SE	8.08e-10	0.000244	27036880	Genome biology	2016	Illumina Infinium HumanMethylation450 (HM450) BeadChip	EUR	771
cg08999081 (chr20:33150536)	20	33150536	33150536	A	Bladder	Bladder urothelial carcinoma	mQTL	0.4	beta	0.0640964	Estimated SE	1.1e-09	NA	30203047	Nucleic acids research	2019	Illumina Infinium HumanMethylation450 BeadChip array	MIX	405
cg27629776 (chr20:33880370)	20	33880370	33880370	NA	Blood	normal	mQTL	0.314997	beta	0.0517407	Estimated SE	1.74e-09	0.000415	27036880	Genome biology	2016	Illumina Infinium HumanMethylation450 (HM450) BeadChip	EUR	837
cg16321524 (chr20:33422627)	20	33422627	33422627	NA	Blood	normal	mQTL	0.304492	beta	0.0502154	Estimated SE	2.09e-09	0.000562	27036880	Genome biology	2016	Illumina Infinium HumanMethylation450 (HM450) BeadChip	EUR	764
cg12419685 (chr20:33451367)	20	33451367	33451367	NA	Blood	normal	mQTL	-0.334621	beta	0.0555518	Estimated SE	2.64e-09	0.000748	27036880	Genome biology	2016	Illumina Infinium HumanMethylation450 (HM450) BeadChip	EUR	771
cg27629776 (chr20:33880370)	20	33880370	33880370	NA	Blood	normal	mQTL	0.301451	beta	0.0504287	Estimated SE	3.47e-09	0.000899	27036880	Genome biology	2016	Illumina Infinium HumanMethylation450 (HM450) BeadChip	EUR	764
cg08999081 (chr20:33150536)	20	33150536	33150536	NA	Blood	normal	mQTL	0.26357	beta	0.0441924	Estimated SE	3.63e-09	0.000795	27036880	Genome biology	2016	Illumina Infinium HumanMethylation450 (HM450) BeadChip	EUR	834
cg24642439 (chr20:33292090)	20	33292090	33292090	A	Skin	Sarcoma	mQTL	0.6	beta	0.100043	Estimated SE	6.77e-09	NA	30203047	Nucleic acids research	2019	Illumina Infinium HumanMethylation450 BeadChip array	MIX	257
cg07148914 (chr20:33460835)	20	33460835	33460835	A	Liver	Liver hepatocellular carcinoma	mQTL	0.53	beta	0.0895789	Estimated SE	7.54e-09	NA	30203047	Nucleic acids research	2019	Illumina Infinium HumanMethylation450 BeadChip array	MIX	367
cg06115741 (chr20:33292138)	20	33292138	33292138	A	Liver	Liver hepatocellular carcinoma	mQTL	0.49	beta	0.0833022	Estimated SE	9.12e-09	NA	30203047	Nucleic acids research	2019	Illumina Infinium HumanMethylation450 BeadChip array	MIX	367
cg24642439 (chr20:33292090)	20	33292090	33292090	NA	Blood	normal	mQTL	-0.311052	beta	0.0537121	Estimated SE	9.89e-09	0.00211	27036880	Genome biology	2016	Illumina Infinium HumanMethylation450 (HM450) BeadChip	EUR	837
cg24642439 (chr20:33292090)	20	33292090	33292090	A	Large Intestine-Colon	Colon adenocarcinoma+Rectum adenocarcinoma	mQTL	0.44	beta	0.0761245	Estimated SE	1.64e-08	NA	30203047	Nucleic acids research	2019	Illumina Infinium HumanMethylation450 BeadChip array	MIX	354
cg08999081 (chr20:33150536)	20	33150536	33150536	A	Large Intestine-Colon	Colon adenocarcinoma+Rectum adenocarcinoma	mQTL	0.43	beta	0.0758651	Estimated SE	3e-08	NA	30203047	Nucleic acids research	2019	Illumina Infinium HumanMethylation450 BeadChip array	MIX	354
cg21132536 (chr20:33465180)	20	33465180	33465180	NA	Blood	normal	mQTL	0.310372	beta	0.0554647	Estimated SE	3.09e-08	0.00747	27036880	Genome biology	2016	Illumina Infinium HumanMethylation450 (HM450) BeadChip	EUR	742
cg21357996 (chr20:33578276)	20	33578276	33578276	NA	Blood-Neutrophils CD16+	normal	mQTL	0.7892	beta	0.1462	Original reported SE	6.68e-08	1.19e-05	27863251	Cell	2016	Infinium HumanMethylation450 assays	MIX	197
cg24642439 (chr20:33292090)	20	33292090	33292090	A	Kidney	Kidney renal clear cell carcinoma	mQTL	0.52	beta	0.0947372	Estimated SE	8.5e-08	NA	30203047	Nucleic acids research	2019	Illumina Infinium HumanMethylation450 BeadChip array	MIX	306
cg06115741 (chr20:33292138)	20	33292138	33292138	A	Skin	Sarcoma	mQTL	0.54	beta	0.101437	Estimated SE	2.22e-07	NA	30203047	Nucleic acids research	2019	Illumina Infinium HumanMethylation450 BeadChip array	MIX	257
cg24642439 (chr20:33292090)	20	33292090	33292090	A	Skin	Skin cutaneous melanoma	mQTL	0.99	beta	0.185341	Estimated SE	5.54e-07	NA	30203047	Nucleic acids research	2019	Illumina Infinium HumanMethylation450 BeadChip array	MIX	103
cg24642439 (chr20:33292090)	20	33292090	33292090	NA	Blood-Monocytes CD14+	normal	mQTL	0.6099	beta	0.124	Original reported SE	8.8e-07	2.08e-06	27863251	Cell	2016	Infinium HumanMethylation450 assays	MIX	197
cg08999081 (chr20:33150536)	20	33150536	33150536	A	Kidney	Kidney renal papillary cell carcinoma	mQTL	0.46	beta	0.0941632	Estimated SE	1.77e-06	NA	30203047	Nucleic acids research	2019	Illumina Infinium HumanMethylation450 BeadChip array	MIX	271
cg06115741 (chr20:33292138)	20	33292138	33292138	NA	Blood-Monocytes CD14+	normal	mQTL	0.5686	beta	0.1245	Original reported SE	4.97e-06	6.73e-06	27863251	Cell	2016	Infinium HumanMethylation450 assays	MIX	197
cg24642439 (chr20:33292090)	20	33292090	33292090	A	Uterus	Uterine corpus endometrial carcinoma	mQTL	0.53	beta	0.113343	Estimated SE	5.91e-06	NA	30203047	Nucleic acids research	2019	Illumina Infinium HumanMethylation450 BeadChip array	MIX	171
cg08999081 (chr20:33150536)	20	33150536	33150536	A	Pancreas	Pancreatic adenocarcinoma	mQTL	0.5	beta	0.113911	Estimated SE	1.95e-05	NA	30203047	Nucleic acids research	2019	Illumina Infinium HumanMethylation450 BeadChip array	MIX	177
cg00820065 (chr20:33292135)	20	33292135	33292135	NA	Blood-Monocytes CD14+	normal	mQTL	-0.4728	beta	0.1265	Original reported SE	0.000185	0.00104	27863251	Cell	2016	Infinium HumanMethylation450 assays	MIX	197
cg21357996 (chr20:33578276)	20	33578276	33578276	NA	Blood-Monocytes CD14+	normal	mQTL	0.4587	beta	0.1262	Original reported SE	0.000278	0.00594	27863251	Cell	2016	Infinium HumanMethylation450 assays	MIX	197
cg21132536 (chr20:33465180)	20	33465180	33465180	NA	Blood-Monocytes CD14+	normal	mQTL	0.4403	beta	0.1259	Original reported SE	0.000469	0.00358	27863251	Cell	2016	Infinium HumanMethylation450 assays	MIX	197
cg08743392 (chr20:33543028)	20	33543028	33543028	NA	Blood-Monocytes CD14+	normal	mQTL	-0.4379	beta	0.1263	Original reported SE	0.000525	0.0149	27863251	Cell	2016	Infinium HumanMethylation450 assays	MIX	197
cg10099364 (chr20:32899426)	20	32899426	32899426	NA	Blood-Neutrophils CD16+	normal	mQTL	-0.4423	beta	0.1527	Original reported SE	0.00378	0.107	27863251	Cell	2016	Infinium HumanMethylation450 assays	MIX	197
cg01538392 (chr20:33291225)	20	33291225	33291225	NA	Blood-Monocytes CD14+	normal	mQTL	-0.3579	beta	0.1272	Original reported SE	0.00491	0.17	27863251	Cell	2016	Infinium HumanMethylation450 assays	MIX	197
cg24642439 (chr20:33292090)	20	33292090	33292090	NA	Blood-Neutrophils CD16+	normal	mQTL	0.4103	beta	0.1537	Original reported SE	0.0076	0.033	27863251	Cell	2016	Infinium HumanMethylation450 assays	MIX	197

## Sheet: rs1801310-eQTL
Trait	CHR	START	END	Effective_Allele	tissue	Tissue_State	xqtl	Effect_Size	Effect_Size_Desc	SE	SE_Desc	PVAL	FDR	PMID	Journal	year	Platform	Population	Sample_Size
GGT7	20	33432523	33460659	A	Blood	null	eQTL	NA	NA	NA	Estimated SE	2.77e-137	NA	bioRxiv_447367	bioRxiv	2018	Illumina HT-12v3, Illumina HT-12v4 and Illumina HT-12v4 WGDASL arrays	MIX	31684
TRPC4AP	20	33590207	33680610	A	Blood	null	eQTL	NA	NA	NA	Estimated SE	8.68e-137	NA	bioRxiv_447367	bioRxiv	2018	Illumina HT-12v3, Illumina HT-12v4 and Illumina HT-12v4 WGDASL arrays	MIX	31684
UQCC1	20	33890369	33999834	A	Blood	null	eQTL	NA	NA	NA	Estimated SE	4.17e-86	NA	bioRxiv_447367	bioRxiv	2018	Illumina HT-12v3, Illumina HT-12v4 and Illumina HT-12v4 WGDASL arrays	MIX	31684
TRPC4AP	20	33590207	33680610	A	Blood	normal	eQTL	-0.382376	beta	0.026321	Original reported SE	8.1e-48	NA	28065468	American journal of human genetics	2017	Illumina Whole-Genome Expression BeadChips	MIX	2765
EIF6	20	33866714	33872788	A	Blood	null	eQTL	NA	NA	NA	Estimated SE	7.91e-36	NA	bioRxiv_447367	bioRxiv	2018	Illumina HT-12v3, Illumina HT-12v4 and Illumina HT-12v4 WGDASL arrays	MIX	31684
MAP1LC3A	20	33134658	33148149	A	Blood	null	eQTL	NA	NA	NA	Estimated SE	5.54e-35	NA	bioRxiv_447367	bioRxiv	2018	Illumina HT-12v3, Illumina HT-12v4 and Illumina HT-12v4 WGDASL arrays	MIX	31684
PROCR	20	33759875	33804043	A	Blood	null	eQTL	NA	NA	NA	Estimated SE	5.42e-31	NA	bioRxiv_447367	bioRxiv	2018	Illumina HT-12v3, Illumina HT-12v4 and Illumina HT-12v4 WGDASL arrays	MIX	31684
NCOA6	20	33276901	33413454	A	Blood	null	eQTL	NA	NA	NA	Estimated SE	3.8e-28	NA	bioRxiv_447367	bioRxiv	2018	Illumina HT-12v3, Illumina HT-12v4 and Illumina HT-12v4 WGDASL arrays	MIX	31684
ITCH	20	32951041	33099198	A	Blood	null	eQTL	NA	NA	NA	Estimated SE	3.15e-27	NA	bioRxiv_447367	bioRxiv	2018	Illumina HT-12v3, Illumina HT-12v4 and Illumina HT-12v4 WGDASL arrays	MIX	31684
MYH7B	20	33563206	33590240	A	Blood	null	eQTL	NA	NA	NA	Estimated SE	1.42e-23	NA	bioRxiv_447367	bioRxiv	2018	Illumina HT-12v3, Illumina HT-12v4 and Illumina HT-12v4 WGDASL arrays	MIX	31684
GGT7	20	33432523	33460659	A	Blood	normal	eQTL	0.273307	beta	0.0278874	Original reported SE	1.1e-22	NA	28065468	American journal of human genetics	2017	Illumina Whole-Genome Expression BeadChips	MIX	2765
PIGU	20	33148346	33286594	G	Testis	normal	eQTL	0.59145	beta	0.0558247	Original reported SE	7.27e-21	NA	25954001	Science	2015	Illumina HiSeq 2000	EUR	225
ACSS2	20	33459949	33515765	NA	Blood-T cell CD4+	normal	eQTL	-1.02579	beta	NA	Estimated SE	2.57e-20	NA	30449622	Cell	2018	HiSeq 2497 Illumina	MIX	106
EDEM2	20	33703167	33735139	A	Blood	null	eQTL	NA	NA	NA	Estimated SE	1.25e-19	NA	bioRxiv_447367	bioRxiv	2018	Illumina HT-12v3, Illumina HT-12v4 and Illumina HT-12v4 WGDASL arrays	MIX	31684
TP53INP2	20	33292143	33301243	A	Blood	null	eQTL	NA	NA	NA	Estimated SE	5.88e-19	NA	bioRxiv_447367	bioRxiv	2018	Illumina HT-12v3, Illumina HT-12v4 and Illumina HT-12v4 WGDASL arrays	MIX	31684
PIGU	20	33148346	33286594	A	Blood	null	eQTL	NA	NA	NA	Estimated SE	9.71e-19	NA	bioRxiv_447367	bioRxiv	2018	Illumina HT-12v3, Illumina HT-12v4 and Illumina HT-12v4 WGDASL arrays	MIX	31684
GGT7	20	33432523	33460659	A	Liver	normal	eQTL	8.43347	Z-score	NA	Estimated SE	3.36e-17	NA	28248954	PLoS genetics	2017	HumanHT-12v4 BeadChips	EUR	293
ACSS2	20	33459949	33515765	A	Blood	null	eQTL	NA	NA	NA	Estimated SE	7.57e-16	NA	bioRxiv_447367	bioRxiv	2018	Illumina HT-12v3, Illumina HT-12v4 and Illumina HT-12v4 WGDASL arrays	MIX	31684
MAP1LC3A	20	33134658	33148149	A	Blood	normal	eQTL	0.215276	beta	0.0274733	Original reported SE	4.7e-15	NA	28065468	American journal of human genetics	2017	Illumina Whole-Genome Expression BeadChips	MIX	2765
GGT7	20	33432523	33460659	G	Muscle-Skeletal	normal	eQTL	0.277668	beta	0.0345018	Original reported SE	8.55e-15	NA	25954001	Science	2015	Illumina HiSeq 2000	EUR	491
GGT7	20	33432523	33460659	A	Blood	normal	eQTL	0.214384	beta	0.0279593	Original reported SE	1.8e-14	NA	28065468	American journal of human genetics	2017	Illumina Whole-Genome Expression BeadChips	MIX	2765
EIF2S2	20	32676115	32700049	A	Blood	null	eQTL	NA	NA	NA	Estimated SE	2.63e-14	NA	bioRxiv_447367	bioRxiv	2018	Illumina HT-12v3, Illumina HT-12v4 and Illumina HT-12v4 WGDASL arrays	MIX	31684
ACSS2	20	33459949	33515765	A	Liver	normal	eQTL	7.60745	Z-score	0.999637	Estimated SE	2.8e-14	NA	28248954	PLoS genetics	2017	HumanHT-12v4 BeadChips	EUR	293
GSS	20	33516235	33543830	A	Blood-T cell CD4+ naive	normal	eQTL	-0.1785	beta	0.0217619	Estimated SE	2.99e-14	1.87e-07	27863251	Cell	2016	HiSeq 2000	MIX	197
ACSS2	20	33459949	33515765	NA	Blood-T cell CD4+	normal	eQTL	-0.881054	beta	0.104634	Estimated SE	1.96e-13	NA	30449622	Cell	2018	HiSeq 2494 Illumina	MIX	106
UQCC1	20	33890369	33999834	A	Blood	normal	eQTL	0.201584	beta	0.0279006	Original reported SE	5e-13	NA	28065468	American journal of human genetics	2017	Illumina Whole-Genome Expression BeadChips	MIX	2765
GSS	20	33516235	33543830	G	Skin	normal	eQTL	0.213884	beta	0.0298158	Original reported SE	4.45e-12	NA	25954001	Science	2015	Illumina HiSeq 2000	EUR	414
ACSS2	20	33459949	33515765	G	Peripheral Nervous System	normal	eQTL	0.298655	beta	0.0413918	Original reported SE	4.6e-12	NA	25954001	Science	2015	Illumina HiSeq 2000	EUR	361
MAP1LC3A	20	33134658	33148149	NA	Brain-Prefrontal Cortex	schizophrenia, mood disorder and normal	eQTL	-0.0801679	beta	0.0113023	Estimated SE	4.89e-12	1.25e-09	27668389	Nature neuroscience	2016	HiSeq 2500	EUR	467
NCOA6	20	33276901	33413454	NA	Brain-Prefrontal Cortex	normal	eQTL	NA	NA	NA	Estimated SE	1.08e-11	NA	28869584	Nature neuroscience	2017	Illumina HiSeq	EUR	494
MAP1LC3A	20	33134658	33148149	G	Brain-Cerebellum	normal	eQTL	0.377627	beta	0.051514	Original reported SE	3.22e-11	NA	25954001	Science	2015	Illumina HiSeq 2000	EUR	154
GSS	20	33516235	33543830	NA	Lymphocyte	normal	eQTL	NA	NA	NA	Estimated SE	3.84e-11	NA	24037378	Nature	2013	Illumina HiSeq2000	EUR	373
MAP1LC3A	20	33134658	33148149	G	Artery-Tibial	normal	eQTL	0.157856	beta	0.0234365	Original reported SE	7.56e-11	NA	25954001	Science	2015	Illumina HiSeq 2000	EUR	388
GSS	20	33516235	33543830	G	Blood-T cell CD4+ naive	normal	eQTL	-0.08906	beta	0.0133207	Estimated SE	2.31e-10	7.27e-07	27863251	Cell	2016	HiSeq 2000	MIX	197
ITCH	20	32951041	33099198	G	Lymphocyte	normal	eQTL	0.324862	beta	0.051251	Original reported SE	2.32e-10	NA	25951796	Nature communications	2015	Affymetrix HGC U133 Plus 2.0 GeneChip	EUR	368
GGT7	20	33432523	33460659	A	Adipose-Visceral	normal	eQTL	6.14696	Z-score	0.999791	Estimated SE	7.91e-10	NA	28248954	PLoS genetics	2017	HumanHT-12v4 BeadChips	EUR	283
ACSS2	20	33459949	33515765	G	Brain-Cerebellum	normal	eQTL	0.378423	beta	0.0570596	Original reported SE	1.08e-09	NA	25954001	Science	2015	Illumina HiSeq 2000	EUR	154
ACSS2	20	33459949	33515765	A	Blood	normal	eQTL	0.167612	beta	0.0277136	Original reported SE	1.5e-09	NA	28065468	American journal of human genetics	2017	Illumina Whole-Genome Expression BeadChips	MIX	2765
MYH7B	20	33563206	33590240	NA	Blood-T cell CD4+ naive	normal	eQTL	0.6943	beta	0.1162	Original reported SE	2.28e-09	2.03e-09	27863251	Cell	2016	HiSeq 2000	MIX	197
TRPC4AP	20	33590207	33680610	NA	Liver	normal	eQTL	-0.374698	beta	0.0626735	Original reported SE	3.95e-09	3.83e-06	29650998	Scientific reports	2018	null	EUR	588
PROCR	20	33759875	33804043	NA	Lymphocyte	normal	eQTL	NA	NA	NA	Estimated SE	4.38e-09	NA	24037378	Nature	2013	Illumina HiSeq2000	EUR	373
GSS	20	33516235	33543830	G	Peripheral Nervous System	normal	eQTL	0.194778	beta	0.0325657	Original reported SE	6.42e-09	NA	25954001	Science	2015	Illumina HiSeq 2000	EUR	361
ACSS2	20	33459949	33515765	NA	Blood-T cell CD4+	normal	eQTL	-0.715399	beta	0.113439	Estimated SE	6.71e-09	NA	30449622	Cell	2018	HiSeq 2496 Illumina	MIX	106
MAP1LC3A	20	33134658	33148149	G	Large Intestine-Colon	normal	eQTL	0.26671	beta	0.0439955	Original reported SE	8.75e-09	NA	25954001	Science	2015	Illumina HiSeq 2000	EUR	203
ACSS2	20	33459949	33515765	A	Blood	normal	eQTL	0.152158	beta	0.0278751	Original reported SE	4.8e-08	NA	28065468	American journal of human genetics	2017	Illumina Whole-Genome Expression BeadChips	MIX	2765
GGT7	20	33432523	33460659	G	Skin	normal	eQTL	-0.194081	beta	0.0352817	Original reported SE	7.35e-08	NA	25954001	Science	2015	Illumina HiSeq 2000	EUR	414
GGT7	20	33432523	33460659	NA	Blood-Monocytes CD14+	normal	eQTL	-0.5817	beta	0.1084	Original reported SE	8e-08	2.41e-07	27863251	Cell	2016	HiSeq 2000	MIX	197
MAP1LC3A	20	33134658	33148149	G	Esophagus	normal	eQTL	0.182971	beta	0.033237	Original reported SE	8.28e-08	NA	25954001	Science	2015	Illumina HiSeq 2000	EUR	335
GSS	20	33516235	33543830	G	Muscle-Skeletal	normal	eQTL	0.188657	beta	0.0353353	Original reported SE	1.53e-07	NA	25954001	Science	2015	Illumina HiSeq 2000	EUR	491
MAP1LC3A	20	33134658	33148149	G	Heart-Left Ventricle	normal	eQTL	0.210151	beta	0.0388253	Original reported SE	1.62e-07	NA	25954001	Science	2015	Illumina HiSeq 2000	EUR	272
GGT7	20	33432523	33460659	NA	Blood-Monocyte	normal	eQTL	0.237344	beta	0.0726368	Original reported SE	1.66e-07	NA	24786080	Science	2014	Affymetrix GeneChip Human Gene ST 1.0 microarrays	MIX	696
GGT7	20	33432523	33460659	G	Esophagus	normal	eQTL	-0.171157	beta	0.0319507	Original reported SE	1.72e-07	NA	25954001	Science	2015	Illumina HiSeq 2000	EUR	358
GSS	20	33516235	33543830	G	Esophagus	normal	eQTL	0.167542	beta	0.0313653	Original reported SE	1.86e-07	NA	25954001	Science	2015	Illumina HiSeq 2000	EUR	358
ACSS2	20	33459949	33515765	NA	Brain-Prefrontal Cortex	normal	eQTL	NA	NA	NA	Estimated SE	1.94e-07	NA	28869584	Nature neuroscience	2017	Illumina HiSeq	EUR	494
NCOA6	20	33276901	33413454	G	Heart-Atrial Appendage	normal	eQTL	0.223433	beta	0.0416595	Original reported SE	2.13e-07	NA	25954001	Science	2015	Illumina HiSeq 2000	EUR	264
ACSS2	20	33459949	33515765	G	Brain-Caudate	normal	eQTL	0.340652	beta	0.0620429	Original reported SE	2.22e-07	NA	25954001	Science	2015	Illumina HiSeq 2000	EUR	144
GSS	20	33516235	33543830	NA	Stem cell-iPSC	null	eQTL	-0.878319	beta	0.158647	Estimated SE	2.96e-07	0.000322	28388432	Cell stem cell	2017	Illumina HiSeq 2000/2500 systems	MIX	91
GSS	20	33516235	33543830	NA	Brain-Prefrontal Cortex	schizophrenia, mood disorder and normal	eQTL	-0.0512911	beta	0.00995666	Estimated SE	3.82e-07	5.03e-05	27668389	Nature neuroscience	2016	HiSeq 2500	EUR	467
MAP1LC3A	20	33134658	33148149	G	Artery-Aorta	normal	eQTL	0.216731	beta	0.0415634	Original reported SE	4.32e-07	NA	25954001	Science	2015	Illumina HiSeq 2000	EUR	267
ACSS2	20	33459949	33515765	NA	Blood-Monocyte	normal	eQTL	0.646424	beta	0.121603	Estimated SE	5.93e-07	NA	30449622	Cell	2018	HiSeq 2491 Illumina	MIX	106
PIGU	20	33148346	33286594	NA	Kidney	normal	eQTL	0.698412	beta	0.130605	Estimated SE	6.03e-07	NA	28575649	American journal of human genetics	2017	TCGA (RNA sequencing)	EUR	96
MMP24	20	33814493	33864801	A	Blood	null	eQTL	NA	NA	NA	Estimated SE	6.56e-07	NA	bioRxiv_447367	bioRxiv	2018	Illumina HT-12v3, Illumina HT-12v4 and Illumina HT-12v4 WGDASL arrays	MIX	31684
ACSS2	20	33459949	33515765	NA	Blood-Monocytes CD14+	normal	eQTL	0.5475	beta	0.1101	Original reported SE	6.59e-07	1.73e-06	27863251	Cell	2016	HiSeq 2000	MIX	197
ACSS2	20	33459949	33515765	NA	Blood-T cell CD4+	normal	eQTL	NA	NA	NA	Estimated SE	8.6e-07	NA	24786080	Science	2014	Affymetrix GeneChip Human Gene ST 1.0 microarrays	EUR	377
GGT7	20	33432523	33460659	G	Skin	normal	eQTL	-0.252012	beta	0.0502153	Original reported SE	9.21e-07	NA	25954001	Science	2015	Illumina HiSeq 2000	EUR	335
GSS	20	33516235	33543830	G	Blood-Monocytes CD14+	normal	eQTL	-0.07681	beta	0.0152206	Estimated SE	1.02e-06	0.000374	27863251	Cell	2016	HiSeq 2000	MIX	197
GSS	20	33516235	33543830	A	Blood-Monocytes CD14+	normal	eQTL	-0.1386	beta	0.0274989	Estimated SE	1.05e-06	0.000209	27863251	Cell	2016	HiSeq 2000	MIX	197
GSS	20	33516235	33543830	NA	Brain-Prefrontal Cortex	normal	eQTL	NA	NA	NA	Estimated SE	1.15e-06	NA	28869584	Nature neuroscience	2017	Illumina HiSeq	EUR	494
EDEM2	20	33703167	33735139	A	Blood-Neutrophils CD16+	normal	eQTL	-0.0268	beta	0.00538226	Estimated SE	1.39e-06	0.000253	27863251	Cell	2016	HiSeq 2000	MIX	197
MAP1LC3A	20	33134658	33148149	G	Peripheral Nervous System	normal	eQTL	0.170806	beta	0.0347255	Original reported SE	1.45e-06	NA	25954001	Science	2015	Illumina HiSeq 2000	EUR	361
GSS	20	33516235	33543830	G	Skin	normal	eQTL	0.210998	beta	0.0429904	Original reported SE	1.56e-06	NA	25954001	Science	2015	Illumina HiSeq 2000	EUR	335
ITCH	20	32951041	33099198	G	Skin	normal	eQTL	-0.110193	beta	0.0226166	Original reported SE	1.68e-06	NA	25954001	Science	2015	Illumina HiSeq 2000	EUR	414
NCOA6	20	33276901	33413454	G	Artery-Tibial	normal	eQTL	0.123982	beta	0.0256135	Original reported SE	2.02e-06	NA	25954001	Science	2015	Illumina HiSeq 2000	EUR	388
NCOA6	20	33276901	33413454	G	Lymphocyte	normal	eQTL	-0.176779	beta	0.037216	Original reported SE	2.03e-06	NA	25951796	Nature communications	2015	Affymetrix HGC U133 Plus 2.0 GeneChip	EUR	368
ACSS2	20	33459949	33515765	NA	Blood-T cell CD4+	normal	eQTL	-0.630618	beta	0.12782	Estimated SE	3.01e-06	NA	30449622	Cell	2018	HiSeq 2495 Illumina	MIX	106
ACSS2	20	33459949	33515765	NA	Blood-T cell CD4+ naive	normal	eQTL	-0.5511	beta	0.1183	Original reported SE	3.22e-06	0.000121	27863251	Cell	2016	HiSeq 2000	MIX	197
PROCR	20	33759875	33804043	NA	Blood-Monocytes CD14+	normal	eQTL	-0.5126	beta	0.1102	Original reported SE	3.29e-06	3.18e-05	27863251	Cell	2016	HiSeq 2000	MIX	197
MAP1LC3A	20	33134658	33148149	G	Adipose-Subcutaneous	normal	eQTL	0.167944	beta	0.0355781	Original reported SE	3.53e-06	NA	25954001	Science	2015	Illumina HiSeq 2000	EUR	385
ITCH	20	32951041	33099198	NA	Blood	eczema	eQTL	0.362085	beta	0.078262	Original reported SE	3.72e-06	NA	25951796	Nature communications	2015	Affymetrix U133 Plus 2.0 GeneChip	EUR	240
MAP1LC3A	20	33134658	33148149	G	Brain-Anterior Cingulate Cortex	normal	eQTL	0.224394	beta	0.0465735	Original reported SE	6.09e-06	NA	25954001	Science	2015	Illumina HiSeq 2000	EUR	109
NCOA6	20	33276901	33413454	G	Thyroid Gland	normal	eQTL	0.152157	beta	0.0331917	Original reported SE	6.46e-06	NA	25954001	Science	2015	Illumina HiSeq 2000	EUR	399
EDEM2	20	33703167	33735139	G	Pancreas	normal	eQTL	0.254243	beta	0.0548567	Original reported SE	6.78e-06	NA	25954001	Science	2015	Illumina HiSeq 2000	EUR	220
MAP1LC3A	20	33134658	33148149	G	Muscle-Skeletal	normal	eQTL	0.14869	beta	0.0326517	Original reported SE	6.89e-06	NA	25954001	Science	2015	Illumina HiSeq 2000	EUR	491
MMP24OS	20	33789548	33865934	NA	Blood-Neutrophils CD16+	normal	eQTL	-0.49	beta	0.109	Original reported SE	6.99e-06	3.81e-05	27863251	Cell	2016	HiSeq 2000	MIX	197
TRPC4AP	20	33590207	33680610	G	Esophagus	normal	eQTL	-0.14595	beta	0.0319047	Original reported SE	7.07e-06	NA	25954001	Science	2015	Illumina HiSeq 2000	EUR	358
ACSS2	20	33459949	33515765	G	Brain-Cerebellar Hemisphere	normal	eQTL	0.297745	beta	0.063126	Original reported SE	7.56e-06	NA	25954001	Science	2015	Illumina HiSeq 2000	EUR	125
MAP1LC3A	20	33134658	33148149	G	Skin	normal	eQTL	0.113142	beta	0.0253886	Original reported SE	1.13e-05	NA	25954001	Science	2015	Illumina HiSeq 2000	EUR	414
MYH7B	20	33563206	33590240	G	Large Intestine-Colon	normal	eQTL	0.241708	beta	0.053743	Original reported SE	1.14e-05	NA	25954001	Science	2015	Illumina HiSeq 2000	EUR	246
NCOA6	20	33276901	33413454	G	Liver	Liver hepatocellular carcinoma (LIHC)	eQTL	0.16	beta	0.0362978	Estimated SE	1.37e-05	NA	29036324	Nucleic acids research	2018	null	MIX	369
GGT7	20	33432523	33460659	NA	Blood-Monocyte	normal	eQTL	NA	NA	NA	Estimated SE	1.84e-05	NA	24786080	Science	2014	Affymetrix GeneChip Human Gene ST 1.0 microarrays	EUR	377
ACSS2	20	33459949	33515765	NA	Blood-T cell CD4+	normal	eQTL	-0.5465	beta	0.123869	Estimated SE	2.47e-05	NA	30449622	Cell	2018	HiSeq 2493 Illumina	MIX	106
UQCC1	20	33890369	33999834	G	Bladder	Bladder Urothelial Carcinoma (BLCA)	eQTL	-0.25	beta	0.0588093	Estimated SE	2.64e-05	NA	29036324	Nucleic acids research	2018	null	MIX	408
MYH7B	20	33563206	33590240	NA	Blood-T cell CD4+ naive	normal	eQTL	0.556043	beta	0.126959	Estimated SE	2.8e-05	NA	30449622	Cell	2018	HiSeq 2486 Illumina	MIX	106
MYH7B	20	33563206	33590240	NA	Blood-T cell	normal	eQTL	0.53835	beta	0.123613	Estimated SE	3.08e-05	NA	30449622	Cell	2018	HiSeq 2499 Illumina	MIX	106
ACSS2	20	33459949	33515765	G	Brain-Nucleus Accumbens	normal	eQTL	0.284357	beta	0.0653535	Original reported SE	3.09e-05	NA	25954001	Science	2015	Illumina HiSeq 2000	EUR	130
FAM83C	20	33873534	33880228	G	Skin	normal	eQTL	-0.110155	beta	0.0262474	Original reported SE	3.44e-05	NA	25954001	Science	2015	Illumina HiSeq 2000	EUR	414
GSS	20	33516235	33543830	G	Esophagus	normal	eQTL	0.185376	beta	0.0449607	Original reported SE	4.92e-05	NA	25954001	Science	2015	Illumina HiSeq 2000	EUR	335
PROCR	20	33759875	33804043	G	Thyroid Gland	Thyroid carcinoma (THCA)	eQTL	-0.15	beta	0.0367289	Estimated SE	5.15e-05	NA	29036324	Nucleic acids research	2018	null	MIX	503
ACSS2	20	33459949	33515765	G	Muscle-Skeletal	normal	eQTL	0.123637	beta	0.0303715	Original reported SE	5.59e-05	NA	25954001	Science	2015	Illumina HiSeq 2000	EUR	491
GSS	20	33516235	33543830	G	Lung	normal	eQTL	0.122799	beta	0.0302674	Original reported SE	6.26e-05	NA	25954001	Science	2015	Illumina HiSeq 2000	EUR	383
PROCR	20	33759875	33804043	G	Pancreas	normal	eQTL	0.355541	beta	0.0868565	Original reported SE	6.37e-05	NA	25954001	Science	2015	Illumina HiSeq 2000	EUR	220
ACSS2	20	33459949	33515765	G	Esophagus	normal	eQTL	0.174916	beta	0.0427793	Original reported SE	6.59e-05	NA	25954001	Science	2015	Illumina HiSeq 2000	EUR	213
PROCR	20	33759875	33804043	G	Lung	Lung adenocarcinoma (LUAD)	eQTL	-0.19	beta	0.047263	Estimated SE	6.69e-05	NA	29036324	Nucleic acids research	2018	null	MIX	514
MAP1LC3A	20	33134658	33148149	G	Thyroid Gland	normal	eQTL	0.151176	beta	0.0375204	Original reported SE	6.94e-05	NA	25954001	Science	2015	Illumina HiSeq 2000	EUR	399
ACSS2	20	33459949	33515765	A	Adipose-Visceral	normal	eQTL	3.97438	Z-score	0.999925	Estimated SE	7.06e-05	0.43	28248954	PLoS genetics	2017	HumanHT-12v4 BeadChips	EUR	283
GSS	20	33516235	33543830	G	Heart-Left Ventricle	normal	eQTL	0.200925	beta	0.0496785	Original reported SE	7.26e-05	NA	25954001	Science	2015	Illumina HiSeq 2000	EUR	272
MAP1LC3A	20	33134658	33148149	G	Adipose-Visceral	normal	eQTL	0.148282	beta	0.0373537	Original reported SE	9.31e-05	NA	25954001	Science	2015	Illumina HiSeq 2000	EUR	313
MAP1LC3A	20	33134658	33148149	G	Fibroblast	normal	eQTL	0.105104	beta	0.0264912	Original reported SE	9.51e-05	NA	25954001	Science	2015	Illumina HiSeq 2000	EUR	300
MT1P3	20	33805812	33805988	NA	Brain-Prefrontal Cortex	normal	eQTL	NA	NA	NA	Estimated SE	0.000103	NA	28869584	Nature neuroscience	2017	Illumina HiSeq	EUR	494
MMP24OS	20	33789548	33865934	A	Blood	null	eQTL	NA	NA	NA	Estimated SE	0.000112	NA	bioRxiv_447367	bioRxiv	2018	Illumina HT-12v3, Illumina HT-12v4 and Illumina HT-12v4 WGDASL arrays	MIX	31684
GGT7	20	33432523	33460659	G	Fibroblast	normal	eQTL	-0.13662	beta	0.0355504	Original reported SE	0.000154	NA	25954001	Science	2015	Illumina HiSeq 2000	EUR	300
MYH7B	20	33563206	33590240	G	Thyroid Gland	normal	eQTL	0.102509	beta	0.0268782	Original reported SE	0.000163	NA	25954001	Science	2015	Illumina HiSeq 2000	EUR	399
MYH7B	20	33563206	33590240	G	Thyroid Gland	Thyroid carcinoma (THCA)	eQTL	0.12	beta	0.0320509	Estimated SE	0.000202	NA	29036324	Nucleic acids research	2018	null	MIX	503
NCOA6	20	33276901	33413454	NA	Skin	normal	eQTL	-0.258734	beta	0.070292	Original reported SE	0.000232	NA	25951796	Nature communications	2015	Affymetrix GeneChip	EUR	110
PIGU	20	33148346	33286594	G	Brain	Lower Grade Glioma (LGG)	eQTL	0.16	beta	0.0442908	Estimated SE	0.000333	NA	29036324	Nucleic acids research	2018	null	MIX	515
MYH7B	20	33563206	33590240	A	Blood-T cell CD4+ naive	normal	eQTL	0.2442	beta	0.0679281	Estimated SE	0.00041	0.0262	27863251	Cell	2016	HiSeq 2000	MIX	197
AHCY	20	32868074	32899608	A	Blood	null	eQTL	NA	NA	NA	Estimated SE	0.000437	NA	bioRxiv_447367	bioRxiv	2018	Illumina HT-12v3, Illumina HT-12v4 and Illumina HT-12v4 WGDASL arrays	MIX	31684
PIGU	20	33148346	33286594	NA	Blood-T cell CD4+ naive	normal	eQTL	-0.4136	beta	0.1202	Original reported SE	0.000577	0.00945	27863251	Cell	2016	HiSeq 2000	MIX	197
MAP1LC3A	20	33134658	33148149	NA	Brain-Prefrontal Cortex	schizophrenia, mood disorder and normal	eQTL	-0.0949776	beta	0.0278169	Estimated SE	0.000695	0.0778	27668389	Nature neuroscience	2016	HiSeq 2500	EUR	467
CEP250	20	34042985	34107108	A	Blood	null	eQTL	NA	NA	NA	Estimated SE	0.000913	NA	bioRxiv_447367	bioRxiv	2018	Illumina HT-12v3, Illumina HT-12v4 and Illumina HT-12v4 WGDASL arrays	MIX	31684
PIGU	20	33148346	33286594	NA	Kidney	nephrotic syndrome	eQTL	0.336509	beta	0.100877	Original reported SE	0.0011	NA	30057032	American journal of human genetics	2018	Affymetrix 2.1 ST chips	MIX	166
GGT7	20	33432523	33460659	NA	Brain-Prefrontal Cortex	normal	eQTL	NA	NA	NA	Estimated SE	0.00124	NA	28869584	Nature neuroscience	2017	Illumina HiSeq	EUR	494
ITCH	20	32951041	33099198	NA	Brain-Prefrontal Cortex	schizophrenia, mood disorder and normal	eQTL	-0.014604	beta	0.00467357	Estimated SE	0.00189	0.082	27668389	Nature neuroscience	2016	HiSeq 2500	EUR	467
GSS	20	33516235	33543830	NA	Blood-Monocytes CD14+	normal	eQTL	0.3432	beta	0.1116	Original reported SE	0.0021	0.0168	27863251	Cell	2016	HiSeq 2000	MIX	197
GSS	20	33516235	33543830	NA	Brain-Prefrontal Cortex	schizophrenia, mood disorder and normal	eQTL	-0.0675974	beta	0.0220899	Estimated SE	0.00234	0.183	27668389	Nature neuroscience	2016	HiSeq 2500	EUR	467
ACSS2	20	33459949	33515765	NA	Brain-Prefrontal Cortex	schizophrenia, mood disorder and normal	eQTL	-0.0274871	beta	0.00904231	Estimated SE	0.0025	0.101	27668389	Nature neuroscience	2016	HiSeq 2500	EUR	467
MMP24OS	20	33789548	33865934	NA	Brain-Prefrontal Cortex	schizophrenia, mood disorder and normal	eQTL	0.053094	beta	0.0177274	Estimated SE	0.00289	0.112	27668389	Nature neuroscience	2016	HiSeq 2500	EUR	467
TRPC4AP	20	33590207	33680610	NA	Blood-T cell CD4+ naive	normal	eQTL	-0.3467	beta	0.1205	Original reported SE	0.004	0.00308	27863251	Cell	2016	HiSeq 2000	MIX	197
RALY	20	32581452	32696114	A	Blood	null	eQTL	NA	NA	NA	Estimated SE	0.00471	NA	bioRxiv_447367	bioRxiv	2018	Illumina HT-12v3, Illumina HT-12v4 and Illumina HT-12v4 WGDASL arrays	MIX	31684
TRPC4AP	20	33590207	33680610	NA	Blood-Monocytes CD14+	normal	eQTL	-0.3156	beta	0.112	Original reported SE	0.00483	0.0288	27863251	Cell	2016	HiSeq 2000	MIX	197
NCOA6	20	33276901	33413454	NA	Kidney	nephrotic syndrome	eQTL	0.266505	beta	0.0923909	Original reported SE	0.00484	NA	30057032	American journal of human genetics	2018	Affymetrix 2.1 ST chips	MIX	136
NFS1	20	34255974	34287277	A	Blood	null	eQTL	NA	NA	NA	Estimated SE	0.00544	NA	bioRxiv_447367	bioRxiv	2018	Illumina HT-12v3, Illumina HT-12v4 and Illumina HT-12v4 WGDASL arrays	MIX	31684
NCOA6	20	33276901	33413454	NA	Blood-T cell CD4+ naive	normal	eQTL	-0.3302	beta	0.1217	Original reported SE	0.00668	0.0776	27863251	Cell	2016	HiSeq 2000	MIX	197
TRPC4AP	20	33590207	33680610	NA	Blood-Neutrophils CD16+	normal	eQTL	-0.2969	beta	0.1108	Original reported SE	0.00734	0.0197	27863251	Cell	2016	HiSeq 2000	MIX	197
NCOA6	20	33276901	33413454	NA	Blood	eczema	eQTL	-0.147456	beta	0.055054	Original reported SE	0.0074	NA	25951796	Nature communications	2015	Affymetrix U133 Plus 2.0 GeneChip	EUR	240
GGT7	20	33432523	33460659	A	Blood	normal	eQTL	-2.56011	Z-score	0.960407	Estimated SE	0.0105	0.809	29610479	Nature genetics	2018	Illumina HiSeq4000	EUR	45
ACSS2	20	33459949	33515765	A	Blood-T cell CD4+ naive	normal	eQTL	-0.0281	beta	0.0109327	Estimated SE	0.0109	0.216	27863251	Cell	2016	HiSeq 2000	MIX	197
NCOA6	20	33276901	33413454	NA	Blood-Neutrophils CD16+	normal	eQTL	0.2793	beta	0.1116	Original reported SE	0.0123	0.205	27863251	Cell	2016	HiSeq 2000	MIX	197
RBM39	20	34289269	34330234	A	Blood	null	eQTL	NA	NA	NA	Estimated SE	0.0126	NA	bioRxiv_447367	bioRxiv	2018	Illumina HT-12v3, Illumina HT-12v4 and Illumina HT-12v4 WGDASL arrays	MIX	31684
MAP1LC3A	20	33134658	33148149	NA	Blood-Neutrophils CD16+	normal	eQTL	-0.2743	beta	0.1111	Original reported SE	0.0136	0.0338	27863251	Cell	2016	HiSeq 2000	MIX	197
RALY	20	32581452	32696114	NA	Brain-Prefrontal Cortex	normal	eQTL	NA	NA	NA	Estimated SE	0.0156	NA	28869584	Nature neuroscience	2017	Illumina HiSeq	EUR	494
RBM39	20	34289269	34330234	NA	Blood-Neutrophils CD16+	normal	eQTL	-0.2677	beta	0.1116	Original reported SE	0.0164	0.108	27863251	Cell	2016	HiSeq 2000	MIX	197
MMP24OS	20	33789548	33865934	NA	Blood-T cell CD4+ naive	normal	eQTL	-0.29	beta	0.1208	Original reported SE	0.0164	0.0316	27863251	Cell	2016	HiSeq 2000	MIX	197
ERGIC3	20	34129770	34145405	NA	Brain-Prefrontal Cortex	normal	eQTL	NA	NA	NA	Estimated SE	0.0169	NA	28869584	Nature neuroscience	2017	Illumina HiSeq	EUR	494
EDEM2	20	33703167	33735139	G	Blood-Neutrophils CD16+	normal	eQTL	-0.01325	beta	0.00562135	Estimated SE	0.0194	0.381	27863251	Cell	2016	HiSeq 2000	MIX	197
GSS	20	33516235	33543830	A	Blood	normal	eQTL	-2.32097	Z-score	0.966179	Estimated SE	0.0203	0.875	29610479	Nature genetics	2018	Illumina HiSeq4000	EUR	45
GGT7	20	33432523	33460659	A	Blood-T cell CD4+	normal	eQTL	-2.29231	Z-score	0.966878	Estimated SE	0.0219	0.888	29610479	Nature genetics	2018	Illumina HiSeq4000	EUR	45
UQCC1	20	33890369	33999834	NA	Blood-Monocytes CD14+	normal	eQTL	-0.2538	beta	0.1117	Original reported SE	0.0231	0.00846	27863251	Cell	2016	HiSeq 2000	MIX	197
RBM12	20	34236847	34252878	A	Blood	null	eQTL	NA	NA	NA	Estimated SE	0.0237	NA	bioRxiv_447367	bioRxiv	2018	Illumina HT-12v3, Illumina HT-12v4 and Illumina HT-12v4 WGDASL arrays	MIX	31684
ITCH	20	32951041	33099198	NA	Blood-Neutrophils CD16+	normal	eQTL	-0.2504	beta	0.1111	Original reported SE	0.0242	0.264	27863251	Cell	2016	HiSeq 2000	MIX	197
NFS1	20	34255974	34287277	NA	Blood-Neutrophils CD16+	normal	eQTL	0.2475	beta	0.1106	Original reported SE	0.0252	0.399	27863251	Cell	2016	HiSeq 2000	MIX	197
GSS	20	33516235	33543830	A	Blood-T cell CD8+	normal	eQTL	-2.18542	Z-score	0.968946	Estimated SE	0.0288	0.947	29610479	Nature genetics	2018	Illumina HiSeq4000	EUR	45
GGT7	20	33432523	33460659	A	Blood-T cell CD8+	normal	eQTL	-2.14292	Z-score	0.970172	Estimated SE	0.0321	0.951	29610479	Nature genetics	2018	Illumina HiSeq4000	EUR	45
MYH7B	20	33563206	33590240	NA	Brain-Prefrontal Cortex	normal	eQTL	NA	NA	NA	Estimated SE	0.033	NA	28869584	Nature neuroscience	2017	Illumina HiSeq	EUR	494
DYNLRB1	20	33104214	33128762	NA	Blood-T cell CD4+ naive	normal	eQTL	-0.2578	beta	0.121	Original reported SE	0.0331	0.061	27863251	Cell	2016	HiSeq 2000	MIX	197
ACSS2	20	33459949	33515765	G	Blood-T cell CD4+ naive	normal	eQTL	-0.01798	beta	0.008525	Estimated SE	0.0362	0.543	27863251	Cell	2016	HiSeq 2000	MIX	197
ACSS2	20	33459949	33515765	A	Blood-T cell CD8+	normal	eQTL	-2.09351	Z-score	0.971374	Estimated SE	0.0363	0.957	29610479	Nature genetics	2018	Illumina HiSeq4000	EUR	45
GGT7	20	33432523	33460659	A	Blood-Neutrophils CD16+	normal	eQTL	0.1954	beta	0.0929969	Estimated SE	0.0369	0.437	27863251	Cell	2016	HiSeq 2000	MIX	197
HIGD1AP16	20	34466398	34466655	NA	Blood-Neutrophils CD16+	normal	eQTL	-0.2322	beta	0.1115	Original reported SE	0.0372	0.403	27863251	Cell	2016	HiSeq 2000	MIX	197
ACSS2	20	33459949	33515765	A	Blood-Monocyte	normal	eQTL	-2.07942	Z-score	0.97182	Estimated SE	0.0376	0.954	29610479	Nature genetics	2018	Illumina HiSeq4000	EUR	45
ITCH	20	32951041	33099198	NA	Kidney	nephrotic syndrome	eQTL	0.139546	beta	0.0672311	Original reported SE	0.0399	NA	30057032	American journal of human genetics	2018	Affymetrix 2.1 ST chips	MIX	166
MAP1LC3A	20	33134658	33148149	NA	Blood-Monocytes CD14+	normal	eQTL	-0.2208	beta	0.1126	Original reported SE	0.0498	0.189	27863251	Cell	2016	HiSeq 2000	MIX	197

## Sheet: rs1801310-mQTL
Trait	CHR	START	END	Effective_Allele	tissue	Tissue_State	xqtl	Effect_Size	Effect_Size_Desc	SE	SE_Desc	PVAL	FDR	PMID	Journal	year	Platform	Population	Sample_Size
cg07148914 (chr20:33460835)	20	33460835	33460835	NA	Blood	normal	mQTL	-0.444862	beta	NA	Estimated SE	2.57e-31	8.07e-25	27036880	Genome biology	2016	Illumina Infinium HumanMethylation450 (HM450) BeadChip	EUR	771
cg07148914 (chr20:33460835)	20	33460835	33460835	NA	Blood	normal	mQTL	-0.387687	beta	NA	Estimated SE	3.31e-25	5.28e-19	27036880	Genome biology	2016	Illumina Infinium HumanMethylation450 (HM450) BeadChip	EUR	837
cg16321524 (chr20:33422627)	20	33422627	33422627	NA	Blood	normal	mQTL	-0.431945	beta	NA	Estimated SE	7.17e-25	9.18e-19	27036880	Genome biology	2016	Illumina Infinium HumanMethylation450 (HM450) BeadChip	EUR	764
cg07148914 (chr20:33460835)	20	33460835	33460835	G	Prostate	Prostate adenocarcinoma	mQTL	0.63	beta	NA	Estimated SE	8.3e-25	NA	30203047	Nucleic acids research	2019	Illumina Infinium HumanMethylation450 BeadChip array	MIX	479
cg16321524 (chr20:33422627)	20	33422627	33422627	NA	Blood	normal	mQTL	-0.389516	beta	NA	Estimated SE	3.47e-24	4.62e-18	27036880	Genome biology	2016	Illumina Infinium HumanMethylation450 (HM450) BeadChip	EUR	837
cg07148914 (chr20:33460835)	20	33460835	33460835	G	Thyroid Gland	Thyroid carcinoma	mQTL	0.6	beta	NA	Estimated SE	1.68e-23	NA	30203047	Nucleic acids research	2019	Illumina Infinium HumanMethylation450 BeadChip array	MIX	498
cg16321524 (chr20:33422627)	20	33422627	33422627	NA	Blood	normal	mQTL	-0.37658	beta	NA	Estimated SE	2e-22	1.73e-16	27036880	Genome biology	2016	Illumina Infinium HumanMethylation450 (HM450) BeadChip	EUR	834
cg16321524 (chr20:33422627)	20	33422627	33422627	NA	Blood	normal	mQTL	-0.405558	beta	NA	Estimated SE	3.51e-22	4.91e-16	27036880	Genome biology	2016	Illumina Infinium HumanMethylation450 (HM450) BeadChip	EUR	742
cg07148914 (chr20:33460835)	20	33460835	33460835	G	Breast	Breast invasive carcinoma	mQTL	0.47	beta	NA	Estimated SE	5.42e-22	NA	30203047	Nucleic acids research	2019	Illumina Infinium HumanMethylation450 BeadChip array	MIX	664
cg19481439 (chr20:33451427)	20	33451427	33451427	NA	Blood	normal	mQTL	0.435158	beta	NA	Estimated SE	9.06e-22	1.02e-15	27036880	Genome biology	2016	Illumina Infinium HumanMethylation450 (HM450) BeadChip	EUR	771
cg07148914 (chr20:33460835)	20	33460835	33460835	G	Liver	Liver hepatocellular carcinoma	mQTL	0.66	beta	NA	Estimated SE	2.83e-21	NA	30203047	Nucleic acids research	2019	Illumina Infinium HumanMethylation450 BeadChip array	MIX	367
cg12419685 (chr20:33451367)	20	33451367	33451367	NA	Blood	normal	mQTL	0.416314	beta	NA	Estimated SE	7.97e-21	7.94e-15	27036880	Genome biology	2016	Illumina Infinium HumanMethylation450 (HM450) BeadChip	EUR	771
cg07242267 (chr20:33460843)	20	33460843	33460843	NA	Blood	normal	mQTL	-0.378135	beta	NA	Estimated SE	1.28e-20	1.22e-14	27036880	Genome biology	2016	Illumina Infinium HumanMethylation450 (HM450) BeadChip	EUR	837
cg07148914 (chr20:33460835)	20	33460835	33460835	NA	Blood	normal	mQTL	-0.346192	beta	NA	Estimated SE	6.6e-20	4.27e-14	27036880	Genome biology	2016	Illumina Infinium HumanMethylation450 (HM450) BeadChip	EUR	834
cg07148914 (chr20:33460835)	20	33460835	33460835	G	Brain	Lower grade glioma	mQTL	0.57	beta	NA	Estimated SE	1.12e-19	NA	30203047	Nucleic acids research	2019	Illumina Infinium HumanMethylation450 BeadChip array	MIX	487
cg07148914 (chr20:33460835)	20	33460835	33460835	NA	Blood	normal	mQTL	-0.366615	beta	NA	Estimated SE	3.72e-19	3.8e-13	27036880	Genome biology	2016	Illumina Infinium HumanMethylation450 (HM450) BeadChip	EUR	742
cg08999081 (chr20:33150536)	20	33150536	33150536	NA	Blood	normal	mQTL	-0.313754	beta	NA	Estimated SE	3.5e-18	2.45e-12	27036880	Genome biology	2016	Illumina Infinium HumanMethylation450 (HM450) BeadChip	EUR	837
cg08999081 (chr20:33150536)	20	33150536	33150536	NA	Blood	normal	mQTL	-0.307434	beta	NA	Estimated SE	4.11e-18	2.3e-12	27036880	Genome biology	2016	Illumina Infinium HumanMethylation450 (HM450) BeadChip	EUR	834
cg07148914 (chr20:33460835)	20	33460835	33460835	NA	Blood	normal	mQTL	-0.371435	beta	NA	Estimated SE	8.35e-18	5.98e-12	27036880	Genome biology	2016	Illumina Infinium HumanMethylation450 (HM450) BeadChip	EUR	764
cg08999081 (chr20:33150536)	20	33150536	33150536	NA	Blood	normal	mQTL	-0.307832	beta	NA	Estimated SE	8.69e-18	8e-12	27036880	Genome biology	2016	Illumina Infinium HumanMethylation450 (HM450) BeadChip	EUR	742
cg07242267 (chr20:33460843)	20	33460843	33460843	NA	Blood	normal	mQTL	-0.342161	beta	NA	Estimated SE	6.5e-17	5.69e-11	27036880	Genome biology	2016	Illumina Infinium HumanMethylation450 (HM450) BeadChip	EUR	742
cg07148914 (chr20:33460835)	20	33460835	33460835	G	Lung	Lung squamous cell carcinoma	mQTL	0.56	beta	0.0657227	Estimated SE	5.09e-16	NA	30203047	Nucleic acids research	2019	Illumina Infinium HumanMethylation450 BeadChip array	MIX	359
cg07148914 (chr20:33460835)	20	33460835	33460835	G	Kidney	Kidney renal clear cell carcinoma	mQTL	0.61	beta	0.0726776	Estimated SE	1.69e-15	NA	30203047	Nucleic acids research	2019	Illumina Infinium HumanMethylation450 BeadChip array	MIX	306
cg17250863 (chr20:33451272)	20	33451272	33451272	NA	Blood	normal	mQTL	0.357972	beta	0.0440587	Estimated SE	1.78e-15	9.96e-10	27036880	Genome biology	2016	Illumina Infinium HumanMethylation450 (HM450) BeadChip	EUR	771
cg24642439 (chr20:33292090)	20	33292090	33292090	G	Breast	Breast invasive carcinoma	mQTL	0.41	beta	0.0506261	Estimated SE	2.71e-15	NA	30203047	Nucleic acids research	2019	Illumina Infinium HumanMethylation450 BeadChip array	MIX	664
cg07148914 (chr20:33460835)	20	33460835	33460835	G	Kidney	Kidney renal papillary cell carcinoma	mQTL	0.65	beta	0.0778441	Estimated SE	3.64e-15	NA	30203047	Nucleic acids research	2019	Illumina Infinium HumanMethylation450 BeadChip array	MIX	271
cg09953425 (chr20:33451149)	20	33451149	33451149	NA	Blood	normal	mQTL	0.339815	beta	0.0423439	Estimated SE	3.68e-15	1.99e-09	27036880	Genome biology	2016	Illumina Infinium HumanMethylation450 (HM450) BeadChip	EUR	771
cg24642439 (chr20:33292090)	20	33292090	33292090	G	Bladder	Bladder urothelial carcinoma	mQTL	0.57	beta	0.0697735	Estimated SE	4.04e-15	NA	30203047	Nucleic acids research	2019	Illumina Infinium HumanMethylation450 BeadChip array	MIX	405
cg05054831 (chr20:33265543)	20	33265543	33265543	NA	Blood	normal	mQTL	-0.33062	beta	0.0415578	Estimated SE	5.7e-15	2.71e-09	27036880	Genome biology	2016	Illumina Infinium HumanMethylation450 (HM450) BeadChip	EUR	837
cg07242267 (chr20:33460843)	20	33460843	33460843	NA	Blood	normal	mQTL	-0.303394	beta	0.0381572	Estimated SE	5.91e-15	2.54e-09	27036880	Genome biology	2016	Illumina Infinium HumanMethylation450 (HM450) BeadChip	EUR	834
cg08999081 (chr20:33150536)	20	33150536	33150536	G	Brain	Head and neck squamous cell carcinoma	mQTL	0.42	beta	0.0523713	Estimated SE	7.64e-15	NA	30203047	Nucleic acids research	2019	Illumina Infinium HumanMethylation450 BeadChip array	MIX	501
cg07242267 (chr20:33460843)	20	33460843	33460843	NA	Blood	normal	mQTL	-0.322424	beta	0.0408402	Estimated SE	1e-14	5.26e-09	27036880	Genome biology	2016	Illumina Infinium HumanMethylation450 (HM450) BeadChip	EUR	771
cg07242267 (chr20:33460843)	20	33460843	33460843	NA	Blood	normal	mQTL	-0.341927	beta	0.0433505	Estimated SE	1.06e-14	5.48e-09	27036880	Genome biology	2016	Illumina Infinium HumanMethylation450 (HM450) BeadChip	EUR	764
cg08999081 (chr20:33150536)	20	33150536	33150536	NA	Blood	normal	mQTL	-0.287098	beta	0.0366969	Estimated SE	1.71e-14	8.63e-09	27036880	Genome biology	2016	Illumina Infinium HumanMethylation450 (HM450) BeadChip	EUR	764
cg07148914 (chr20:33460835)	20	33460835	33460835	G	Bladder	Bladder urothelial carcinoma	mQTL	0.53	beta	0.0671713	Estimated SE	2.85e-14	NA	30203047	Nucleic acids research	2019	Illumina Infinium HumanMethylation450 BeadChip array	MIX	405
cg05054831 (chr20:33265543)	20	33265543	33265543	NA	Blood	normal	mQTL	-0.318296	beta	0.0413089	Estimated SE	4.03e-14	2.03e-08	27036880	Genome biology	2016	Illumina Infinium HumanMethylation450 (HM450) BeadChip	EUR	771
cg24642439 (chr20:33292090)	20	33292090	33292090	G	Prostate	Prostate adenocarcinoma	mQTL	0.48	beta	0.0632874	Estimated SE	1.75e-13	NA	30203047	Nucleic acids research	2019	Illumina Infinium HumanMethylation450 BeadChip array	MIX	479
cg08999081 (chr20:33150536)	20	33150536	33150536	G	Prostate	Prostate adenocarcinoma	mQTL	0.38	beta	0.0512283	Estimated SE	5.46e-13	NA	30203047	Nucleic acids research	2019	Illumina Infinium HumanMethylation450 BeadChip array	MIX	479
cg07148914 (chr20:33460835)	20	33460835	33460835	G	Stomach	Stomach adenocarcinoma	mQTL	0.37	beta	0.0499212	Estimated SE	8.68e-13	NA	30203047	Nucleic acids research	2019	Illumina Infinium HumanMethylation450 BeadChip array	MIX	367
cg24912415 (chr20:33585435)	20	33585435	33585435	NA	Blood	normal	mQTL	0.32852	beta	0.0451989	Estimated SE	9.01e-13	3.79e-07	27036880	Genome biology	2016	Illumina Infinium HumanMethylation450 (HM450) BeadChip	EUR	764
cg05054831 (chr20:33265543)	20	33265543	33265543	NA	Blood	normal	mQTL	-0.301877	beta	0.0416336	Estimated SE	9.46e-13	3.31e-07	27036880	Genome biology	2016	Illumina Infinium HumanMethylation450 (HM450) BeadChip	EUR	834
cg07148914 (chr20:33460835)	20	33460835	33460835	G	Brain	Head and neck squamous cell carcinoma	mQTL	0.39	beta	0.0533484	Estimated SE	1.06e-12	NA	30203047	Nucleic acids research	2019	Illumina Infinium HumanMethylation450 BeadChip array	MIX	501
cg07148914 (chr20:33460835)	20	33460835	33460835	NA	Blood-Monocytes CD14+	normal	mQTL	0.7407	beta	0.1043	Original reported SE	1.26e-12	1.06e-11	27863251	Cell	2016	Infinium HumanMethylation450 assays	MIX	197
cg07148914 (chr20:33460835)	20	33460835	33460835	G	Large Intestine-Colon	Colon adenocarcinoma+Rectum adenocarcinoma	mQTL	0.46	beta	0.0629693	Estimated SE	1.85e-12	NA	30203047	Nucleic acids research	2019	Illumina Infinium HumanMethylation450 BeadChip array	MIX	354
cg24642439 (chr20:33292090)	20	33292090	33292090	G	Brain	Lower grade glioma	mQTL	0.45	beta	0.0641959	Estimated SE	8e-12	NA	30203047	Nucleic acids research	2019	Illumina Infinium HumanMethylation450 BeadChip array	MIX	487
cg24642439 (chr20:33292090)	20	33292090	33292090	G	Kidney	Kidney renal clear cell carcinoma	mQTL	0.52	beta	0.073864	Estimated SE	1.27e-11	NA	30203047	Nucleic acids research	2019	Illumina Infinium HumanMethylation450 BeadChip array	MIX	306
cg00952050 (chr20:33585040)	20	33585040	33585040	NA	Blood	normal	mQTL	0.303247	beta	0.0452649	Estimated SE	4.06e-11	1.41e-05	27036880	Genome biology	2016	Illumina Infinium HumanMethylation450 (HM450) BeadChip	EUR	764
cg07148914 (chr20:33460835)	20	33460835	33460835	G	Cervix	Cervical squamous cell carcinoma and endocervical adenocarcinoma	mQTL	0.52	beta	0.0767389	Estimated SE	6.88e-11	NA	30203047	Nucleic acids research	2019	Illumina Infinium HumanMethylation450 BeadChip array	MIX	290
cg24642439 (chr20:33292090)	20	33292090	33292090	G	Lung	Lung squamous cell carcinoma	mQTL	0.45	beta	0.0694807	Estimated SE	3.09e-10	NA	30203047	Nucleic acids research	2019	Illumina Infinium HumanMethylation450 BeadChip array	MIX	359
cg04149172 (chr20:34000170)	20	34000170	34000170	NA	Blood	normal	mQTL	-0.301225	beta	0.0474556	Estimated SE	3.75e-10	0.000111	27036880	Genome biology	2016	Illumina Infinium HumanMethylation450 (HM450) BeadChip	EUR	764
cg08999081 (chr20:33150536)	20	33150536	33150536	G	Bladder	Bladder urothelial carcinoma	mQTL	0.35	beta	0.0550935	Estimated SE	5.69e-10	NA	30203047	Nucleic acids research	2019	Illumina Infinium HumanMethylation450 BeadChip array	MIX	405
cg27629776 (chr20:33880370)	20	33880370	33880370	NA	Blood	normal	mQTL	-0.243802	beta	0.0396594	Estimated SE	1.22e-09	0.000293	27036880	Genome biology	2016	Illumina Infinium HumanMethylation450 (HM450) BeadChip	EUR	834
cg05054831 (chr20:33265543)	20	33265543	33265543	NA	Blood	normal	mQTL	-0.270281	beta	0.0440428	Estimated SE	1.37e-09	0.00041	27036880	Genome biology	2016	Illumina Infinium HumanMethylation450 (HM450) BeadChip	EUR	742
cg08999081 (chr20:33150536)	20	33150536	33150536	NA	Blood	normal	mQTL	-0.230002	beta	0.0376369	Estimated SE	1.57e-09	0.000456	27036880	Genome biology	2016	Illumina Infinium HumanMethylation450 (HM450) BeadChip	EUR	771
cg24912415 (chr20:33585435)	20	33585435	33585435	NA	Blood	normal	mQTL	0.268419	beta	0.0443016	Estimated SE	2.07e-09	0.000486	27036880	Genome biology	2016	Illumina Infinium HumanMethylation450 (HM450) BeadChip	EUR	837
cg27629776 (chr20:33880370)	20	33880370	33880370	NA	Blood	normal	mQTL	-0.248902	beta	0.0411343	Estimated SE	2.17e-09	0.000508	27036880	Genome biology	2016	Illumina Infinium HumanMethylation450 (HM450) BeadChip	EUR	837
cg14752227 (chr20:34000481)	20	34000481	34000481	NA	Blood	normal	mQTL	-0.284806	beta	0.0473973	Estimated SE	2.89e-09	0.000758	27036880	Genome biology	2016	Illumina Infinium HumanMethylation450 (HM450) BeadChip	EUR	764
cg11092487 (chr20:33585188)	20	33585188	33585188	NA	Blood	normal	mQTL	0.269383	beta	0.0451677	Estimated SE	3.76e-09	0.000963	27036880	Genome biology	2016	Illumina Infinium HumanMethylation450 (HM450) BeadChip	EUR	764
cg24642439 (chr20:33292090)	20	33292090	33292090	G	Stomach	Stomach adenocarcinoma	mQTL	0.42	beta	0.0712909	Estimated SE	8.67e-09	NA	30203047	Nucleic acids research	2019	Illumina Infinium HumanMethylation450 BeadChip array	MIX	367
cg05389922 (chr20:34000172)	20	34000172	34000172	NA	Blood	normal	mQTL	-0.258146	beta	0.0444789	Estimated SE	9.5e-09	0.00228	27036880	Genome biology	2016	Illumina Infinium HumanMethylation450 (HM450) BeadChip	EUR	764
cg05054831 (chr20:33265543)	20	33265543	33265543	NA	Blood	normal	mQTL	-0.257003	beta	0.0447171	Estimated SE	1.31e-08	0.00307	27036880	Genome biology	2016	Illumina Infinium HumanMethylation450 (HM450) BeadChip	EUR	764
cg07148914 (chr20:33460835)	20	33460835	33460835	G	Pancreas	Pancreatic adenocarcinoma	mQTL	0.62	beta	0.104195	Estimated SE	1.4e-08	NA	30203047	Nucleic acids research	2019	Illumina Infinium HumanMethylation450 BeadChip array	MIX	177
cg24642439 (chr20:33292090)	20	33292090	33292090	NA	Blood-Monocytes CD14+	normal	mQTL	0.6065	beta	0.1071	Original reported SE	1.48e-08	4.82e-08	27863251	Cell	2016	Infinium HumanMethylation450 assays	MIX	197
cg01901788 (chr20:33145848)	20	33145848	33145848	NA	Blood	normal	mQTL	-0.254979	beta	0.0451617	Estimated SE	2.31e-08	0.0055	27036880	Genome biology	2016	Illumina Infinium HumanMethylation450 (HM450) BeadChip	EUR	771
cg24642439 (chr20:33292090)	20	33292090	33292090	G	Adrenal Gland	Pheochromocytoma and paraganglioma	mQTL	0.62	beta	0.106284	Estimated SE	2.57e-08	NA	30203047	Nucleic acids research	2019	Illumina Infinium HumanMethylation450 BeadChip array	MIX	175
cg16321524 (chr20:33422627)	20	33422627	33422627	NA	Blood-Monocytes CD14+	normal	mQTL	0.5946	beta	0.1068	Original reported SE	2.62e-08	1.69e-07	27863251	Cell	2016	Infinium HumanMethylation450 assays	MIX	197
cg24642439 (chr20:33292090)	20	33292090	33292090	G	Kidney	Kidney renal papillary cell carcinoma	mQTL	0.5	beta	0.0876494	Estimated SE	3.05e-08	NA	30203047	Nucleic acids research	2019	Illumina Infinium HumanMethylation450 BeadChip array	MIX	271
cg07148914 (chr20:33460835)	20	33460835	33460835	G	Adrenal Gland	Pheochromocytoma and paraganglioma	mQTL	0.58	beta	0.100069	Estimated SE	3.1e-08	NA	30203047	Nucleic acids research	2019	Illumina Infinium HumanMethylation450 BeadChip array	MIX	175
cg14752227 (chr20:34000481)	20	34000481	34000481	NA	Blood	normal	mQTL	-0.267739	beta	0.0480925	Estimated SE	3.62e-08	0.00861	27036880	Genome biology	2016	Illumina Infinium HumanMethylation450 (HM450) BeadChip	EUR	742
cg08999081 (chr20:33150536)	20	33150536	33150536	G	Pancreas	Pancreatic adenocarcinoma	mQTL	0.53	beta	0.0923365	Estimated SE	4.04e-08	NA	30203047	Nucleic acids research	2019	Illumina Infinium HumanMethylation450 BeadChip array	MIX	177
cg11092487 (chr20:33585188)	20	33585188	33585188	NA	Blood	normal	mQTL	0.232287	beta	0.0421607	Estimated SE	4.79e-08	0.00923	27036880	Genome biology	2016	Illumina Infinium HumanMethylation450 (HM450) BeadChip	EUR	837
cg06115741 (chr20:33292138)	20	33292138	33292138	G	Kidney	Kidney renal clear cell carcinoma	mQTL	0.44	beta	0.0789688	Estimated SE	5.53e-08	NA	30203047	Nucleic acids research	2019	Illumina Infinium HumanMethylation450 BeadChip array	MIX	306
cg16321524 (chr20:33422627)	20	33422627	33422627	NA	Blood-Neutrophils CD16+	normal	mQTL	0.6814	beta	0.1265	Original reported SE	7.17e-08	1.52e-06	27863251	Cell	2016	Infinium HumanMethylation450 assays	MIX	197
cg24642439 (chr20:33292090)	20	33292090	33292090	G	Skin	Sarcoma	mQTL	0.46	beta	0.0830259	Estimated SE	7.46e-08	NA	30203047	Nucleic acids research	2019	Illumina Infinium HumanMethylation450 BeadChip array	MIX	257
cg07148914 (chr20:33460835)	20	33460835	33460835	G	Skin	Sarcoma	mQTL	0.45	beta	0.0828381	Estimated SE	1.29e-07	NA	30203047	Nucleic acids research	2019	Illumina Infinium HumanMethylation450 BeadChip array	MIX	257
cg21132536 (chr20:33465180)	20	33465180	33465180	NA	Blood-Monocytes CD14+	normal	mQTL	0.5625	beta	0.1077	Original reported SE	1.75e-07	4.81e-06	27863251	Cell	2016	Infinium HumanMethylation450 assays	MIX	197
cg07148914 (chr20:33460835)	20	33460835	33460835	NA	Blood-Neutrophils CD16+	normal	mQTL	0.6236	beta	0.1273	Original reported SE	9.69e-07	8.8e-06	27863251	Cell	2016	Infinium HumanMethylation450 assays	MIX	197
cg08999081 (chr20:33150536)	20	33150536	33150536	G	Thymus	Thymoma	mQTL	0.63	beta	0.12262	Estimated SE	1.09e-06	NA	30203047	Nucleic acids research	2019	Illumina Infinium HumanMethylation450 BeadChip array	MIX	120
cg08999081 (chr20:33150536)	20	33150536	33150536	NA	Blood-Monocytes CD14+	normal	mQTL	0.5124	beta	0.1078	Original reported SE	2.02e-06	2.35e-06	27863251	Cell	2016	Infinium HumanMethylation450 assays	MIX	197
cg05054831 (chr20:33265543)	20	33265543	33265543	NA	Blood-Monocytes CD14+	normal	mQTL	0.5029	beta	0.1087	Original reported SE	3.7e-06	9.46e-06	27863251	Cell	2016	Infinium HumanMethylation450 assays	MIX	197
cg24642439 (chr20:33292090)	20	33292090	33292090	G	Blood	Acute myeloid leukemia	mQTL	0.62	beta	0.130048	Estimated SE	5.21e-06	NA	30203047	Nucleic acids research	2019	Illumina Infinium HumanMethylation450 BeadChip array	MIX	122
cg17206393 (chr20:33681223)	20	33681223	33681223	NA	Blood-Monocytes CD14+	normal	mQTL	-0.4915	beta	0.1085	Original reported SE	5.89e-06	1.28e-05	27863251	Cell	2016	Infinium HumanMethylation450 assays	MIX	197
cg05054831 (chr20:33265543)	20	33265543	33265543	NA	Blood-Neutrophils CD16+	normal	mQTL	0.5783	beta	0.1287	Original reported SE	6.96e-06	4.27e-05	27863251	Cell	2016	Infinium HumanMethylation450 assays	MIX	197
cg27629776 (chr20:33880370)	20	33880370	33880370	NA	Blood-Monocytes CD14+	normal	mQTL	0.4651	beta	0.1089	Original reported SE	1.95e-05	1.16e-05	27863251	Cell	2016	Infinium HumanMethylation450 assays	MIX	197
cg14752227 (chr20:34000481)	20	34000481	34000481	NA	Blood-Monocytes CD14+	normal	mQTL	0.4462	beta	0.109	Original reported SE	4.27e-05	0.00017	27863251	Cell	2016	Infinium HumanMethylation450 assays	MIX	197
cg16143910 (chr20:34319989)	20	34319989	34319989	NA	Blood-Neutrophils CD16+	normal	mQTL	0.497	beta	0.1301	Original reported SE	0.000134	0.000373	27863251	Cell	2016	Infinium HumanMethylation450 assays	MIX	197
cg06115741 (chr20:33292138)	20	33292138	33292138	NA	Blood-Neutrophils CD16+	normal	mQTL	0.4737	beta	0.1301	Original reported SE	0.00027	0.00214	27863251	Cell	2016	Infinium HumanMethylation450 assays	MIX	197
cg06115741 (chr20:33292138)	20	33292138	33292138	NA	Blood-Monocytes CD14+	normal	mQTL	0.3919	beta	0.1097	Original reported SE	0.000352	0.000261	27863251	Cell	2016	Infinium HumanMethylation450 assays	MIX	197
cg26821293 (chr20:33880930)	20	33880930	33880930	NA	Blood-Monocytes CD14+	normal	mQTL	-0.3799	beta	0.1099	Original reported SE	0.000546	0.00436	27863251	Cell	2016	Infinium HumanMethylation450 assays	MIX	197
cg14752227 (chr20:34000481)	20	34000481	34000481	NA	Blood-Neutrophils CD16+	normal	mQTL	0.4451	beta	0.1304	Original reported SE	0.00064	0.0102	27863251	Cell	2016	Infinium HumanMethylation450 assays	MIX	197
cg08999081 (chr20:33150536)	20	33150536	33150536	NA	Blood-Neutrophils CD16+	normal	mQTL	0.4286	beta	0.1306	Original reported SE	0.00103	0.000919	27863251	Cell	2016	Infinium HumanMethylation450 assays	MIX	197
cg07242267 (chr20:33460843)	20	33460843	33460843	NA	Blood-Neutrophils CD16+	normal	mQTL	0.4299	beta	0.1312	Original reported SE	0.00105	0.00276	27863251	Cell	2016	Infinium HumanMethylation450 assays	MIX	197
cg27632911 (chr20:34205182)	20	34205182	34205182	NA	Blood-Monocytes CD14+	normal	mQTL	0.3564	beta	0.1107	Original reported SE	0.00128	0.000383	27863251	Cell	2016	Infinium HumanMethylation450 assays	MIX	197
cg00820065 (chr20:33292135)	20	33292135	33292135	NA	Blood-Monocytes CD14+	normal	mQTL	-0.3566	beta	0.1107	Original reported SE	0.00128	0.00379	27863251	Cell	2016	Infinium HumanMethylation450 assays	MIX	197
cg11277126 (chr20:33680945)	20	33680945	33680945	NA	Blood-Monocytes CD14+	normal	mQTL	-0.3527	beta	0.1103	Original reported SE	0.00139	0.0119	27863251	Cell	2016	Infinium HumanMethylation450 assays	MIX	197
cg27629776 (chr20:33880370)	20	33880370	33880370	NA	Blood-Neutrophils CD16+	normal	mQTL	0.4145	beta	0.1301	Original reported SE	0.00144	0.00193	27863251	Cell	2016	Infinium HumanMethylation450 assays	MIX	197
cg11547334 (chr20:34287314)	20	34287314	34287314	NA	Blood-Neutrophils CD16+	normal	mQTL	0.4122	beta	0.1311	Original reported SE	0.00167	0.0229	27863251	Cell	2016	Infinium HumanMethylation450 assays	MIX	197
cg03605404 (chr20:34251574)	20	34251574	34251574	NA	Blood-Neutrophils CD16+	normal	mQTL	-0.3869	beta	0.1325	Original reported SE	0.00349	0.00487	27863251	Cell	2016	Infinium HumanMethylation450 assays	MIX	197
cg26038318 (chr20:34205095)	20	34205095	34205095	NA	Blood-Neutrophils CD16+	normal	mQTL	0.3805	beta	0.1313	Original reported SE	0.00376	0.00119	27863251	Cell	2016	Infinium HumanMethylation450 assays	MIX	197
cg15400591 (chr20:33762943)	20	33762943	33762943	NA	Blood-Neutrophils CD16+	normal	mQTL	0.3787	beta	0.1315	Original reported SE	0.00399	0.0119	27863251	Cell	2016	Infinium HumanMethylation450 assays	MIX	197
cg14880655 (chr20:33133505)	20	33133505	33133505	NA	Blood-Neutrophils CD16+	normal	mQTL	0.3688	beta	0.1301	Original reported SE	0.0046	0.0517	27863251	Cell	2016	Infinium HumanMethylation450 assays	MIX	197
cg26221491 (chr20:34117195)	20	34117195	34117195	NA	Blood-Monocytes CD14+	normal	mQTL	-0.312	beta	0.1106	Original reported SE	0.00479	0.0156	27863251	Cell	2016	Infinium HumanMethylation450 assays	MIX	197
cg16151538 (chr20:33676388)	20	33676388	33676388	NA	Blood-Monocytes CD14+	normal	mQTL	0.3024	beta	0.1101	Original reported SE	0.00603	0.0119	27863251	Cell	2016	Infinium HumanMethylation450 assays	MIX	197
cg16655240 (chr20:32857072)	20	32857072	32857072	NA	Blood-Neutrophils CD16+	normal	mQTL	-0.3585	beta	0.1317	Original reported SE	0.00648	0.0212	27863251	Cell	2016	Infinium HumanMethylation450 assays	MIX	197
cg14335782 (chr20:33146543)	20	33146543	33146543	NA	Blood-Neutrophils CD16+	normal	mQTL	0.3549	beta	0.1316	Original reported SE	0.00698	0.0306	27863251	Cell	2016	Infinium HumanMethylation450 assays	MIX	197
cg26493814 (chr20:33868921)	20	33868921	33868921	NA	Blood-Monocytes CD14+	normal	mQTL	-0.2971	beta	0.1104	Original reported SE	0.00711	0.0085	27863251	Cell	2016	Infinium HumanMethylation450 assays	MIX	197
cg19945957 (chr20:33264901)	20	33264901	33264901	NA	Blood-Neutrophils CD16+	normal	mQTL	-0.3465	beta	0.1317	Original reported SE	0.00853	0.0425	27863251	Cell	2016	Infinium HumanMethylation450 assays	MIX	197
cg02939019 (chr20:33146267)	20	33146267	33146267	NA	Blood-Neutrophils CD16+	normal	mQTL	0.3466	beta	0.1323	Original reported SE	0.00877	0.0623	27863251	Cell	2016	Infinium HumanMethylation450 assays	MIX	197
cg22976979 (chr20:33146263)	20	33146263	33146263	NA	Blood-Neutrophils CD16+	normal	mQTL	0.3444	beta	0.1315	Original reported SE	0.0088	0.0253	27863251	Cell	2016	Infinium HumanMethylation450 assays	MIX	197
cg23242649 (chr20:34196465)	20	34196465	34196465	NA	Blood-Monocytes CD14+	normal	mQTL	-0.2884	beta	0.1105	Original reported SE	0.00908	0.114	27863251	Cell	2016	Infinium HumanMethylation450 assays	MIX	197
cg16440058 (chr20:32856846)	20	32856846	32856846	NA	Blood-Neutrophils CD16+	normal	mQTL	-0.3446	beta	0.1324	Original reported SE	0.00924	0.0561	27863251	Cell	2016	Infinium HumanMethylation450 assays	MIX	197

## Sheet: rs1801310-hQTL
Trait	CHR	START	END	Effective_Allele	tissue	Tissue_State	xqtl	Effect_Size	Effect_Size_Desc	SE	SE_Desc	PVAL	FDR	PMID	Journal	year	Platform	Population	Sample_Size
H3K4me1 (chr20:33639665-33659019)	20	33639665	33659019	G	Blood-Monocytes CD14+	normal	hQTL	-0.1044	beta	0.0172794	Estimated SE	7.48e-09	1.63e-06	27863251	Cell	2016	Illumina HiSeq 2000	MIX	197
H3K4me1 (chr20:33486452-33508021)	20	33486452	33508021	G	Blood-Monocytes CD14+	normal	hQTL	0.0522	beta	0.0146231	Estimated SE	0.000449	0.0932	27863251	Cell	2016	Illumina HiSeq 2000	MIX	197
H3K4me1 (chr20:33486452-33508021)	20	33486452	33508021	G	Blood-T cell CD4+ naive	normal	hQTL	-0.05056	beta	0.0150824	Estimated SE	0.000961	0.338	27863251	Cell	2016	Illumina HiSeq 2000	MIX	197
H3K27ac (chr20:33648177-33658956)	20	33648177	33658956	G	Blood-Monocytes CD14+	normal	hQTL	-0.05346	beta	0.0209819	Estimated SE	0.0116	0.507	27863251	Cell	2016	Illumina HiSeq 2000	MIX	197
H3K4me1 (chr20:33603150-33610285)	20	33603150	33610285	G	Blood-T cell CD4+ naive	normal	hQTL	0.09161	beta	0.0384016	Estimated SE	0.018	0.751	27863251	Cell	2016	Illumina HiSeq 2000	MIX	197
H3K27ac (chr20:33499737-33512653)	20	33499737	33512653	G	Blood-T cell CD4+ naive	normal	hQTL	-0.03302	beta	0.0141356	Estimated SE	0.0205	0.647	27863251	Cell	2016	Illumina HiSeq 2000	MIX	197
H3K4me1 (chr20:33662195-33689056)	20	33662195	33689056	G	Blood-Monocytes CD14+	normal	hQTL	-0.02159	beta	0.00957871	Estimated SE	0.0253	0.567	27863251	Cell	2016	Illumina HiSeq 2000	MIX	197
H3K4me1 (chr20:33522413-33532530)	20	33522413	33532530	G	Blood-Monocytes CD14+	normal	hQTL	-0.03015	beta	0.0134317	Estimated SE	0.0259	0.57	27863251	Cell	2016	Illumina HiSeq 2000	MIX	197
H3K27ac (chr20:33675076-33682472)	20	33675076	33682472	G	Blood-Monocytes CD14+	normal	hQTL	0.08507	beta	0.0412102	Estimated SE	0.0403	0.679	27863251	Cell	2016	Illumina HiSeq 2000	MIX	197
H3K27ac (chr20:33727305-33736959)	20	33727305	33736959	G	Blood-T cell CD4+ naive	normal	hQTL	0.02548	beta	0.0124238	Estimated SE	0.0416	0.751	27863251	Cell	2016	Illumina HiSeq 2000	MIX	197
H3K27ac (chr20:33641809-33647826)	20	33641809	33647826	G	Blood-Monocytes CD14+	normal	hQTL	-0.07733	beta	0.0382572	Estimated SE	0.0446	0.694	27863251	Cell	2016	Illumina HiSeq 2000	MIX	197

## Sheet: rs6088660-eQTL
Trait	CHR	START	END	Effective_Allele	tissue	Tissue_State	xqtl	Effect_Size	Effect_Size_Desc	SE	SE_Desc	PVAL	FDR	PMID	Journal	year	Platform	Population	Sample_Size
EDEM2	20	33703167	33735139	T	Blood	normal	eQTL	NA	NA	NA	Estimated SE	6.46e-11	NA	24013639	Nature genetics	2013	HT12-v3 arrays, HT12-v4 arrays, and HumanRef-8 v2 arrays	MIX	5311
ACSS2	20	33459949	33515765	T	Blood	normal	eQTL	NA	NA	NA	Estimated SE	1.1e-06	NA	24013639	Nature genetics	2013	HT12-v3 arrays, HT12-v4 arrays, and HumanRef-8 v2 arrays	MIX	5311
GGT7	20	33432523	33460659	G	Breast	Breast invasive carcinoma (BRCA)	eQTL	0.17	beta	0.0355242	Estimated SE	1.94e-06	NA	29036324	Nucleic acids research	2018	null	MIX	1092
ACSS2	20	33459949	33515765	T	Liver	normal	eQTL	-4.70732	Z-score	0.999854	Estimated SE	2.51e-06	0.0333	28248954	PLoS genetics	2017	HumanHT-12v4 BeadChips	EUR	293
NCOA6	20	33276901	33413454	G	Kidney	Kidney renal clear cell carcinoma (KIRC)	eQTL	-0.21	beta	0.0462662	Estimated SE	7.01e-06	NA	29036324	Nucleic acids research	2018	null	MIX	527
MYH7B	20	33563206	33590240	NA	Kidney	normal	eQTL	0.690891	beta	0.147837	Estimated SE	9.66e-06	NA	28575649	American journal of human genetics	2017	TCGA (RNA sequencing)	EUR	96
NCOA6	20	33276901	33413454	T	Blood	normal	eQTL	NA	NA	NA	Estimated SE	9.95e-06	NA	24013639	Nature genetics	2013	HT12-v3 arrays, HT12-v4 arrays, and HumanRef-8 v2 arrays	MIX	5311
NCOA6	20	33276901	33413454	NA	Brain-Prefrontal Cortex	schizophrenia, mood disorder and normal	eQTL	-0.0390347	beta	0.00948631	Estimated SE	4.58e-05	0.00391	27668389	Nature neuroscience	2016	HiSeq 2500	EUR	467
TRPC4AP	20	33590207	33680610	T	Blood	normal	eQTL	NA	NA	NA	Estimated SE	0.000388	NA	24013639	Nature genetics	2013	HT12-v3 arrays, HT12-v4 arrays, and HumanRef-8 v2 arrays	MIX	5311
TP53INP2	20	33292143	33301243	G	Breast	Breast invasive carcinoma (BRCA)	eQTL	0.12	beta	0.0347779	Estimated SE	0.000581	NA	29036324	Nucleic acids research	2018	null	MIX	1092
HMGB3P1	20	33421378	33422265	NA	Kidney	nephrotic syndrome	eQTL	-0.514909	beta	0.159187	Original reported SE	0.00167	NA	30057032	American journal of human genetics	2018	Affymetrix 2.1 ST chips	MIX	136
EDEM2	20	33703167	33735139	NA	Brain-Prefrontal Cortex	schizophrenia, mood disorder and normal	eQTL	-0.0375631	beta	0.0123114	Estimated SE	0.00241	0.0982	27668389	Nature neuroscience	2016	HiSeq 2500	EUR	467
GGT7	20	33432523	33460659	T	Blood-T cell CD8+	normal	eQTL	2.77465	Z-score	0.953985	Estimated SE	0.00553	0.848	29610479	Nature genetics	2018	Illumina HiSeq4000	EUR	45
UQCC1	20	33890369	33999834	NA	Kidney	nephrotic syndrome	eQTL	-0.273458	beta	0.120485	Original reported SE	0.0255	NA	30057032	American journal of human genetics	2018	Affymetrix 2.1 ST chips	MIX	136
FAM83C-AS1	20	33873054	33873559	NA	Kidney	nephrotic syndrome	eQTL	-0.228596	beta	0.105852	Original reported SE	0.0326	NA	30057032	American journal of human genetics	2018	Affymetrix 2.1 ST chips	MIX	166
MYH7B	20	33563206	33590240	T	Blood-T cell CD4+	normal	eQTL	-2.08646	Z-score	0.971353	Estimated SE	0.0369	0.921	29610479	Nature genetics	2018	Illumina HiSeq4000	EUR	45

## Sheet: rs6088660-mQTL
Trait	CHR	START	END	Effective_Allele	tissue	Tissue_State	xqtl	Effect_Size	Effect_Size_Desc	SE	SE_Desc	PVAL	FDR	PMID	Journal	year	Platform	Population	Sample_Size
cg24912415 (chr20:33585435)	20	33585435	33585435	NA	Blood	normal	mQTL	-0.571826	beta	NA	Estimated SE	1.47e-35	4.02e-29	27036880	Genome biology	2016	Illumina Infinium HumanMethylation450 (HM450) BeadChip	EUR	764
cg11092487 (chr20:33585188)	20	33585188	33585188	NA	Blood	normal	mQTL	-0.549772	beta	NA	Estimated SE	1.57e-33	3.7e-27	27036880	Genome biology	2016	Illumina Infinium HumanMethylation450 (HM450) BeadChip	EUR	764
cg17206393 (chr20:33681223)	20	33681223	33681223	NA	Blood-Monocytes CD14+	normal	mQTL	-1.034	beta	0.1001	Original reported SE	5.18e-25	9.02e-24	27863251	Cell	2016	Infinium HumanMethylation450 assays	MIX	197
cg11092487 (chr20:33585188)	20	33585188	33585188	NA	Blood	normal	mQTL	-0.461738	beta	NA	Estimated SE	8.86e-25	1.32e-18	27036880	Genome biology	2016	Illumina Infinium HumanMethylation450 (HM450) BeadChip	EUR	837
cg11092487 (chr20:33585188)	20	33585188	33585188	NA	Blood	normal	mQTL	-0.484494	beta	NA	Estimated SE	1.19e-24	1.96e-18	27036880	Genome biology	2016	Illumina Infinium HumanMethylation450 (HM450) BeadChip	EUR	742
cg11092487 (chr20:33585188)	20	33585188	33585188	NA	Blood	normal	mQTL	-0.444447	beta	NA	Estimated SE	2.24e-23	2.12e-17	27036880	Genome biology	2016	Illumina Infinium HumanMethylation450 (HM450) BeadChip	EUR	834
cg11277126 (chr20:33680945)	20	33680945	33680945	NA	Blood	normal	mQTL	-0.437554	beta	NA	Estimated SE	5.98e-22	6.35e-16	27036880	Genome biology	2016	Illumina Infinium HumanMethylation450 (HM450) BeadChip	EUR	764
cg24912415 (chr20:33585435)	20	33585435	33585435	NA	Blood	normal	mQTL	-0.454121	beta	NA	Estimated SE	1.38e-21	1.55e-15	27036880	Genome biology	2016	Illumina Infinium HumanMethylation450 (HM450) BeadChip	EUR	837
cg11277126 (chr20:33680945)	20	33680945	33680945	NA	Blood	normal	mQTL	-0.412252	beta	NA	Estimated SE	2.18e-21	1.71e-15	27036880	Genome biology	2016	Illumina Infinium HumanMethylation450 (HM450) BeadChip	EUR	834
cg24912415 (chr20:33585435)	20	33585435	33585435	NA	Blood	normal	mQTL	-0.458854	beta	NA	Estimated SE	2.24e-21	3.03e-15	27036880	Genome biology	2016	Illumina Infinium HumanMethylation450 (HM450) BeadChip	EUR	742
cg00952050 (chr20:33585040)	20	33585040	33585040	NA	Blood	normal	mQTL	-0.439828	beta	NA	Estimated SE	5.24e-21	5.09e-15	27036880	Genome biology	2016	Illumina Infinium HumanMethylation450 (HM450) BeadChip	EUR	764
cg00952050 (chr20:33585040)	20	33585040	33585040	NA	Blood	normal	mQTL	-0.427272	beta	NA	Estimated SE	5.66e-20	3.72e-14	27036880	Genome biology	2016	Illumina Infinium HumanMethylation450 (HM450) BeadChip	EUR	834
cg24912415 (chr20:33585435)	20	33585435	33585435	NA	Blood	normal	mQTL	-0.395875	beta	NA	Estimated SE	1.06e-17	5.63e-12	27036880	Genome biology	2016	Illumina Infinium HumanMethylation450 (HM450) BeadChip	EUR	834
cg01901788 (chr20:33145848)	20	33145848	33145848	NA	Blood	normal	mQTL	0.349756	beta	0.0430266	Estimated SE	1.61e-15	8.2e-10	27036880	Genome biology	2016	Illumina Infinium HumanMethylation450 (HM450) BeadChip	EUR	837
cg00952050 (chr20:33585040)	20	33585040	33585040	NA	Blood	normal	mQTL	-0.352776	beta	0.0454441	Estimated SE	2.42e-14	1.05e-08	27036880	Genome biology	2016	Illumina Infinium HumanMethylation450 (HM450) BeadChip	EUR	837
cg01901788 (chr20:33145848)	20	33145848	33145848	NA	Blood	normal	mQTL	0.336388	beta	0.0455356	Estimated SE	3.93e-13	1.73e-07	27036880	Genome biology	2016	Illumina Infinium HumanMethylation450 (HM450) BeadChip	EUR	764
cg00952050 (chr20:33585040)	20	33585040	33585040	NA	Blood	normal	mQTL	-0.354187	beta	0.0479245	Estimated SE	3.95e-13	1.97e-07	27036880	Genome biology	2016	Illumina Infinium HumanMethylation450 (HM450) BeadChip	EUR	742
cg11092487 (chr20:33585188)	20	33585188	33585188	NA	Blood	normal	mQTL	-0.313437	beta	0.0456438	Estimated SE	1.35e-11	5.1e-06	27036880	Genome biology	2016	Illumina Infinium HumanMethylation450 (HM450) BeadChip	EUR	771
cg00952050 (chr20:33585040)	20	33585040	33585040	NA	Blood	normal	mQTL	-0.33554	beta	0.0491508	Estimated SE	1.76e-11	6.55e-06	27036880	Genome biology	2016	Illumina Infinium HumanMethylation450 (HM450) BeadChip	EUR	771
cg01901788 (chr20:33145848)	20	33145848	33145848	NA	Blood	normal	mQTL	0.298696	beta	0.0441577	Estimated SE	2.52e-11	7.48e-06	27036880	Genome biology	2016	Illumina Infinium HumanMethylation450 (HM450) BeadChip	EUR	834
cg01901788 (chr20:33145848)	20	33145848	33145848	NA	Blood	normal	mQTL	0.312758	beta	0.0480134	Estimated SE	1.32e-10	4.37e-05	27036880	Genome biology	2016	Illumina Infinium HumanMethylation450 (HM450) BeadChip	EUR	771
cg11277126 (chr20:33680945)	20	33680945	33680945	NA	Blood	normal	mQTL	-0.265855	beta	0.0421624	Estimated SE	4.93e-10	0.000158	27036880	Genome biology	2016	Illumina Infinium HumanMethylation450 (HM450) BeadChip	EUR	742
cg11277126 (chr20:33680945)	20	33680945	33680945	NA	Blood	normal	mQTL	-0.288897	beta	0.0458986	Estimated SE	5.18e-10	0.00016	27036880	Genome biology	2016	Illumina Infinium HumanMethylation450 (HM450) BeadChip	EUR	771
cg11277126 (chr20:33680945)	20	33680945	33680945	NA	Blood-Monocytes CD14+	normal	mQTL	-0.6769	beta	0.109	Original reported SE	5.39e-10	1.47e-07	27863251	Cell	2016	Infinium HumanMethylation450 assays	MIX	197
cg11277126 (chr20:33680945)	20	33680945	33680945	NA	Blood	normal	mQTL	-0.267732	beta	0.0447191	Estimated SE	3.17e-09	0.000724	27036880	Genome biology	2016	Illumina Infinium HumanMethylation450 (HM450) BeadChip	EUR	837
cg05054831 (chr20:33265543)	20	33265543	33265543	NA	Blood	normal	mQTL	0.266089	beta	0.0448659	Estimated SE	4.55e-09	0.00123	27036880	Genome biology	2016	Illumina Infinium HumanMethylation450 (HM450) BeadChip	EUR	771
cg07148914 (chr20:33460835)	20	33460835	33460835	NA	Blood	normal	mQTL	0.23817	beta	0.0408292	Estimated SE	7.76e-09	0.00168	27036880	Genome biology	2016	Illumina Infinium HumanMethylation450 (HM450) BeadChip	EUR	837
cg24912415 (chr20:33585435)	20	33585435	33585435	G	Kidney	Kidney renal clear cell carcinoma	mQTL	0.52	beta	0.0921256	Estimated SE	3.78e-08	NA	30203047	Nucleic acids research	2019	Illumina Infinium HumanMethylation450 BeadChip array	MIX	306
cg07242267 (chr20:33460843)	20	33460843	33460843	NA	Blood	normal	mQTL	0.244567	beta	0.0441802	Estimated SE	4.15e-08	0.00807	27036880	Genome biology	2016	Illumina Infinium HumanMethylation450 (HM450) BeadChip	EUR	837
cg11092487 (chr20:33585188)	20	33585188	33585188	NA	Blood-Neutrophils CD16+	normal	mQTL	-0.66	beta	0.1326	Original reported SE	6.42e-07	5.04e-06	27863251	Cell	2016	Infinium HumanMethylation450 assays	MIX	197
cg11092487 (chr20:33585188)	20	33585188	33585188	NA	Blood-Monocytes CD14+	normal	mQTL	-0.5103	beta	0.1116	Original reported SE	4.84e-06	5.94e-05	27863251	Cell	2016	Infinium HumanMethylation450 assays	MIX	197
cg16321524 (chr20:33422627)	20	33422627	33422627	NA	Blood-Monocytes CD14+	normal	mQTL	0.4509	beta	0.1114	Original reported SE	5.18e-05	6.27e-05	27863251	Cell	2016	Infinium HumanMethylation450 assays	MIX	197
cg01901788 (chr20:33145848)	20	33145848	33145848	NA	Blood-Monocytes CD14+	normal	mQTL	0.4502	beta	0.1122	Original reported SE	6.04e-05	0.000427	27863251	Cell	2016	Infinium HumanMethylation450 assays	MIX	197
cg16810054 (chr20:33298113)	20	33298113	33298113	NA	Blood-Neutrophils CD16+	normal	mQTL	0.521	beta	0.1352	Original reported SE	0.000116	0.0017	27863251	Cell	2016	Infinium HumanMethylation450 assays	MIX	197
cg06244927 (chr20:33589992)	20	33589992	33589992	NA	Blood-Monocytes CD14+	normal	mQTL	-0.4085	beta	0.1132	Original reported SE	0.000309	0.0324	27863251	Cell	2016	Infinium HumanMethylation450 assays	MIX	197
cg00952050 (chr20:33585040)	20	33585040	33585040	NA	Blood-Neutrophils CD16+	normal	mQTL	-0.4847	beta	0.135	Original reported SE	0.000329	0.00435	27863251	Cell	2016	Infinium HumanMethylation450 assays	MIX	197
cg16810054 (chr20:33298113)	20	33298113	33298113	NA	Blood-Monocytes CD14+	normal	mQTL	0.4037	beta	0.1127	Original reported SE	0.000341	0.00428	27863251	Cell	2016	Infinium HumanMethylation450 assays	MIX	197
cg16321524 (chr20:33422627)	20	33422627	33422627	NA	Blood-Neutrophils CD16+	normal	mQTL	0.4764	beta	0.1359	Original reported SE	0.000456	0.00206	27863251	Cell	2016	Infinium HumanMethylation450 assays	MIX	197
cg14880655 (chr20:33133505)	20	33133505	33133505	NA	Blood-Neutrophils CD16+	normal	mQTL	0.4618	beta	0.1346	Original reported SE	0.000604	0.049	27863251	Cell	2016	Infinium HumanMethylation450 assays	MIX	197
cg00864334 (chr20:33144897)	20	33144897	33144897	NA	Blood-Neutrophils CD16+	normal	mQTL	0.4482	beta	0.1359	Original reported SE	0.000977	0.0336	27863251	Cell	2016	Infinium HumanMethylation450 assays	MIX	197
cg04270048 (chr20:33296729)	20	33296729	33296729	NA	Blood-Neutrophils CD16+	normal	mQTL	0.4467	beta	0.1363	Original reported SE	0.00104	0.00918	27863251	Cell	2016	Infinium HumanMethylation450 assays	MIX	197
cg16143910 (chr20:34319989)	20	34319989	34319989	NA	Blood-Neutrophils CD16+	normal	mQTL	0.4374	beta	0.1367	Original reported SE	0.00137	0.0026	27863251	Cell	2016	Infinium HumanMethylation450 assays	MIX	197
cg01477133 (chr20:33878142)	20	33878142	33878142	NA	Blood-Neutrophils CD16+	normal	mQTL	-0.4221	beta	0.1364	Original reported SE	0.00197	0.0744	27863251	Cell	2016	Infinium HumanMethylation450 assays	MIX	197
cg08743392 (chr20:33543028)	20	33543028	33543028	NA	Blood-Monocytes CD14+	normal	mQTL	0.3467	beta	0.1131	Original reported SE	0.00217	0.0149	27863251	Cell	2016	Infinium HumanMethylation450 assays	MIX	197
cg15400591 (chr20:33762943)	20	33762943	33762943	NA	Blood-Neutrophils CD16+	normal	mQTL	0.4168	beta	0.1368	Original reported SE	0.00231	0.0105	27863251	Cell	2016	Infinium HumanMethylation450 assays	MIX	197
cg01670714 (chr20:33111318)	20	33111318	33111318	NA	Blood-Neutrophils CD16+	normal	mQTL	0.408	beta	0.1365	Original reported SE	0.0028	0.0719	27863251	Cell	2016	Infinium HumanMethylation450 assays	MIX	197
cg07148914 (chr20:33460835)	20	33460835	33460835	NA	Blood-Neutrophils CD16+	normal	mQTL	0.4044	beta	0.1364	Original reported SE	0.00303	0.00367	27863251	Cell	2016	Infinium HumanMethylation450 assays	MIX	197
cg07148914 (chr20:33460835)	20	33460835	33460835	NA	Blood-Monocytes CD14+	normal	mQTL	0.329	beta	0.1125	Original reported SE	0.00346	0.0012	27863251	Cell	2016	Infinium HumanMethylation450 assays	MIX	197
cg26826207 (chr20:33880353)	20	33880353	33880353	NA	Blood-Monocytes CD14+	normal	mQTL	-0.3306	beta	0.1135	Original reported SE	0.00357	0.0505	27863251	Cell	2016	Infinium HumanMethylation450 assays	MIX	197
cg26221491 (chr20:34117195)	20	34117195	34117195	NA	Blood-Neutrophils CD16+	normal	mQTL	0.3967	beta	0.1375	Original reported SE	0.00391	0.087	27863251	Cell	2016	Infinium HumanMethylation450 assays	MIX	197
cg00582941 (chr20:32888855)	20	32888855	32888855	NA	Blood-Neutrophils CD16+	normal	mQTL	0.3961	beta	0.1376	Original reported SE	0.004	0.0272	27863251	Cell	2016	Infinium HumanMethylation450 assays	MIX	197
cg02957488 (chr20:34359232)	20	34359232	34359232	NA	Blood-Neutrophils CD16+	normal	mQTL	0.3866	beta	0.1364	Original reported SE	0.00458	0.199	27863251	Cell	2016	Infinium HumanMethylation450 assays	MIX	197
cg03928367 (chr20:34186995)	20	34186995	34186995	NA	Blood-Neutrophils CD16+	normal	mQTL	0.3855	beta	0.1371	Original reported SE	0.00493	0.176	27863251	Cell	2016	Infinium HumanMethylation450 assays	MIX	197
cg00952050 (chr20:33585040)	20	33585040	33585040	NA	Blood-Monocytes CD14+	normal	mQTL	-0.3171	beta	0.1134	Original reported SE	0.00517	0.168	27863251	Cell	2016	Infinium HumanMethylation450 assays	MIX	197
cg13242861 (chr20:33588424)	20	33588424	33588424	NA	Blood-Neutrophils CD16+	normal	mQTL	0.3772	beta	0.1375	Original reported SE	0.00608	0.111	27863251	Cell	2016	Infinium HumanMethylation450 assays	MIX	197
cg19481439 (chr20:33451427)	20	33451427	33451427	NA	Blood-Neutrophils CD16+	normal	mQTL	0.3764	beta	0.1374	Original reported SE	0.00614	0.104	27863251	Cell	2016	Infinium HumanMethylation450 assays	MIX	197
cg24855818 (chr20:33880337)	20	33880337	33880337	NA	Blood-Neutrophils CD16+	normal	mQTL	-0.3739	beta	0.1372	Original reported SE	0.00642	0.104	27863251	Cell	2016	Infinium HumanMethylation450 assays	MIX	197
cg19439022 (chr20:34330364)	20	34330364	34330364	NA	Blood-Neutrophils CD16+	normal	mQTL	0.3741	beta	0.1373	Original reported SE	0.00644	0.0563	27863251	Cell	2016	Infinium HumanMethylation450 assays	MIX	197
cg06115741 (chr20:33292138)	20	33292138	33292138	NA	Blood-Neutrophils CD16+	normal	mQTL	0.3725	beta	0.137	Original reported SE	0.00654	0.0175	27863251	Cell	2016	Infinium HumanMethylation450 assays	MIX	197
cg26812397 (chr20:32868631)	20	32868631	32868631	NA	Blood-Neutrophils CD16+	normal	mQTL	0.3726	beta	0.1376	Original reported SE	0.00676	0.19	27863251	Cell	2016	Infinium HumanMethylation450 assays	MIX	197
cg20436037 (chr20:33879989)	20	33879989	33879989	NA	Blood-Neutrophils CD16+	normal	mQTL	0.3719	beta	0.1373	Original reported SE	0.00676	0.106	27863251	Cell	2016	Infinium HumanMethylation450 assays	MIX	197
cg01538392 (chr20:33291225)	20	33291225	33291225	NA	Blood-Monocytes CD14+	normal	mQTL	0.305	beta	0.1137	Original reported SE	0.00729	0.17	27863251	Cell	2016	Infinium HumanMethylation450 assays	MIX	197
cg22744131 (chr20:33133832)	20	33133832	33133832	NA	Blood-Monocytes CD14+	normal	mQTL	-0.3006	beta	0.1133	Original reported SE	0.00798	0.258	27863251	Cell	2016	Infinium HumanMethylation450 assays	MIX	197
cg19945957 (chr20:33264901)	20	33264901	33264901	NA	Blood-Neutrophils CD16+	normal	mQTL	-0.3636	beta	0.1372	Original reported SE	0.00804	0.0425	27863251	Cell	2016	Infinium HumanMethylation450 assays	MIX	197
cg23414001 (chr20:33681070)	20	33681070	33681070	NA	Blood-Monocytes CD14+	normal	mQTL	-0.3008	beta	0.1138	Original reported SE	0.00819	0.0712	27863251	Cell	2016	Infinium HumanMethylation450 assays	MIX	197
cg16161156 (chr20:33303111)	20	33303111	33303111	NA	Blood-Neutrophils CD16+	normal	mQTL	0.3599	beta	0.1367	Original reported SE	0.00846	0.294	27863251	Cell	2016	Infinium HumanMethylation450 assays	MIX	197
cg09575314 (chr20:34220833)	20	34220833	34220833	NA	Blood-Monocytes CD14+	normal	mQTL	-0.2971	beta	0.1135	Original reported SE	0.00886	0.224	27863251	Cell	2016	Infinium HumanMethylation450 assays	MIX	197
cg12302830 (chr20:33297742)	20	33297742	33297742	NA	Blood-Neutrophils CD16+	normal	mQTL	0.3593	beta	0.1378	Original reported SE	0.00911	0.181	27863251	Cell	2016	Infinium HumanMethylation450 assays	MIX	197
cg22868319 (chr20:33265117)	20	33265117	33265117	NA	Blood-Neutrophils CD16+	normal	mQTL	-0.3577	beta	0.1373	Original reported SE	0.00917	0.0335	27863251	Cell	2016	Infinium HumanMethylation450 assays	MIX	197
cg17206393 (chr20:33681223)	20	33681223	33681223	NA	Blood-Neutrophils CD16+	normal	mQTL	-0.3576	beta	0.1374	Original reported SE	0.00924	0.186	27863251	Cell	2016	Infinium HumanMethylation450 assays	MIX	197
cg24855818 (chr20:33880337)	20	33880337	33880337	NA	Blood-Monocytes CD14+	normal	mQTL	-0.296	beta	0.114	Original reported SE	0.00941	0.0311	27863251	Cell	2016	Infinium HumanMethylation450 assays	MIX	197
cg16151538 (chr20:33676388)	20	33676388	33676388	NA	Blood-Neutrophils CD16+	normal	mQTL	0.358	beta	0.1379	Original reported SE	0.00942	0.168	27863251	Cell	2016	Infinium HumanMethylation450 assays	MIX	197
cg17647667 (chr20:33762157)	20	33762157	33762157	NA	Blood-Neutrophils CD16+	normal	mQTL	0.3544	beta	0.1369	Original reported SE	0.00963	0.0597	27863251	Cell	2016	Infinium HumanMethylation450 assays	MIX	197
cg20920419 (chr20:33880935)	20	33880935	33880935	NA	Blood-Neutrophils CD16+	normal	mQTL	-0.3542	beta	0.1374	Original reported SE	0.00995	0.281	27863251	Cell	2016	Infinium HumanMethylation450 assays	MIX	197

## Sheet: rs6088660-sQTL
Trait	CHR	START	END	Effective_Allele	tissue	Tissue_State	xqtl	Effect_Size	Effect_Size_Desc	SE	SE_Desc	PVAL	FDR	PMID	Journal	year	Platform	Population	Sample_Size
TRPC4AP	20	33590207	33680610	NA	Breast	Breast invasive carcinoma	sQTL	-0.43	beta	NA	Estimated SE	1.66e-22	NA	30329095	Nucleic acids research	2019	null	MIX	1090
TRPC4AP	20	33590207	33680610	NA	Thyroid Gland	Thyroid carcinoma	sQTL	-0.65	beta	NA	Estimated SE	6.98e-21	NA	30329095	Nucleic acids research	2019	null	MIX	493
TRPC4AP	20	33590207	33680610	NA	Lung	Lung squamous cell carcinoma	sQTL	-0.58	beta	NA	Estimated SE	3.38e-18	NA	30329095	Nucleic acids research	2019	null	MIX	500
TRPC4AP	20	33590207	33680610	NA	Ovary	Ovarian serous cystadenocarcinoma	sQTL	-0.66	beta	0.0766195	Estimated SE	4.87e-16	NA	30329095	Nucleic acids research	2019	null	MIX	293
TRPC4AP	20	33590207	33680610	NA	Brain	Head and neck squamous cell carcinoma	sQTL	-0.49	beta	0.0613417	Estimated SE	9.45e-15	NA	30329095	Nucleic acids research	2019	null	MIX	499
TRPC4AP	20	33590207	33680610	NA	Prostate	Prostate adenocarcinoma	sQTL	-0.51	beta	0.0676777	Estimated SE	2.4e-13	NA	30329095	Nucleic acids research	2019	null	MIX	485
TRPC4AP	20	33590207	33680610	NA	Kidney	Kidney renal clear cell carcinoma	sQTL	-0.5	beta	0.0717802	Estimated SE	9.78e-12	NA	30329095	Nucleic acids research	2019	null	MIX	527
TRPC4AP	20	33590207	33680610	NA	Brain	Lower grade glioma	sQTL	-0.45	beta	0.0647591	Estimated SE	1.12e-11	NA	30329095	Nucleic acids research	2019	null	MIX	514
TRPC4AP	20	33590207	33680610	NA	Lung	Lung adenocarcinoma	sQTL	-0.46	beta	0.0688873	Estimated SE	6.34e-11	NA	30329095	Nucleic acids research	2019	null	MIX	512
TRPC4AP	20	33590207	33680610	NA	Esophagus	Esophageal carcinoma	sQTL	-0.59	beta	0.0857908	Estimated SE	9.71e-11	NA	30329095	Nucleic acids research	2019	null	MIX	180
TRPC4AP	20	33590207	33680610	NA	Bladder	Bladder urothelial carcinoma	sQTL	-0.47	beta	0.0709507	Estimated SE	1.11e-10	NA	30329095	Nucleic acids research	2019	null	MIX	406
TRPC4AP	20	33590207	33680610	NA	Stomach	Stomach adenocarcinoma	sQTL	-0.48	beta	0.0750358	Estimated SE	4.35e-10	NA	30329095	Nucleic acids research	2019	null	MIX	408
TRPC4AP	20	33590207	33680610	NA	Large Intestine-Colon	Colon adenocarcinoma	sQTL	-0.49	beta	0.0850604	Estimated SE	2.17e-08	NA	30329095	Nucleic acids research	2019	null	MIX	285
TRPC4AP	20	33590207	33680610	NA	Testis	Testicular germ cell tumors	sQTL	-0.45	beta	0.0887769	Estimated SE	1.21e-06	NA	30329095	Nucleic acids research	2019	null	MIX	144
TRPC4AP	20	33590207	33680610	NA	Kidney	Kidney renal papillary cell carcinoma	sQTL	-0.44	beta	0.0909593	Estimated SE	2.14e-06	NA	30329095	Nucleic acids research	2019	null	MIX	290
TRPC4AP	20	33590207	33680610	NA	Pancreas	Pancreatic adenocarcinoma	sQTL	-0.49	beta	0.116545	Estimated SE	4.16e-05	NA	30329095	Nucleic acids research	2019	null	MIX	176
TRPC4AP	20	33590207	33680610	NA	Large Intestine-Colon	Rectum adenocarcinoma	sQTL	-0.5	beta	0.126701	Estimated SE	0.000154	NA	30329095	Nucleic acids research	2019	null	MIX	93
TRPC4AP	20	33590207	33680610	NA	Adrenal Gland	Pheochromocytoma and Paraganglioma	sQTL	-0.42	beta	0.108692	Estimated SE	0.000159	NA	30329095	Nucleic acids research	2019	null	MIX	168
TRPC4AP	20	33590207	33680610	NA	Uterus	Uterine corpus endometrial carcinoma	sQTL	-0.47	beta	0.135425	Estimated SE	0.000662	NA	30329095	Nucleic acids research	2019	null	MIX	166
TRPC4AP	20	33590207	33680610	NA	Skin	Sarcoma	sQTL	-0.26	beta	0.0810344	Estimated SE	0.00151	NA	30329095	Nucleic acids research	2019	null	MIX	248

## Sheet: rs11546155-eQTL
Trait	CHR	START	END	Effective_Allele	tissue	Tissue_State	xqtl	Effect_Size	Effect_Size_Desc	SE	SE_Desc	PVAL	FDR	PMID	Journal	year	Platform	Population	Sample_Size
CEP250	20	34042985	34107108	NA	Blood-Neutrophils CD16+	normal	eQTL	0.3524	beta	0.1424	Original reported SE	0.0133	0.363	27863251	Cell	2016	HiSeq 2000	MIX	197
GGT7	20	33432523	33460659	A	Blood	null	eQTL	NA	NA	NA	Estimated SE	0.00387	NA	bioRxiv_447367	bioRxiv	2018	Illumina HT-12v3, Illumina HT-12v4 and Illumina HT-12v4 WGDASL arrays	MIX	31684
GGT7	20	33432523	33460659	A	Blood	normal	eQTL	NA	NA	NA	Estimated SE	0.00324	NA	24013639	Nature genetics	2013	HT12-v3 arrays, HT12-v4 arrays, and HumanRef-8 v2 arrays	MIX	5311
GGT7	20	33432523	33460659	NA	Blood-T cell CD4+ naive	normal	eQTL	-0.2793	beta	0.1555	Original reported SE	0.0724	0.0333	27863251	Cell	2016	HiSeq 2000	MIX	197
GGT7	20	33432523	33460659	A	Blood-T cell CD4+ naive	normal	eQTL	-0.02947	beta	0.0151325	Estimated SE	0.0529	0.616	27863251	Cell	2016	HiSeq 2000	MIX	197
GGT7	20	33432523	33460659	NA	Kidney	nephrotic syndrome	eQTL	0.256097	beta	0.140322	Original reported SE	0.0711	NA	30057032	American journal of human genetics	2018	Affymetrix 2.1 ST chips	MIX	136
GGT7	20	33432523	33460659	A	Liver	normal	eQTL	4.85198	Z-score	0.999765	Estimated SE	1.22e-06	0.0185	28248954	PLoS genetics	2017	HumanHT-12v4 BeadChips	EUR	293
RALY	20	32581452	32696114	NA	Brain-Prefrontal Cortex	normal	eQTL	NA	NA	NA	Estimated SE	0.0517	NA	28869584	Nature neuroscience	2017	Illumina HiSeq	EUR	494
PIGU	20	33148346	33286594	A	Blood	null	eQTL	NA	NA	NA	Estimated SE	0.000152	NA	bioRxiv_447367	bioRxiv	2018	Illumina HT-12v3, Illumina HT-12v4 and Illumina HT-12v4 WGDASL arrays	MIX	31684
PIGU	20	33148346	33286594	NA	Blood-Neutrophils CD16+	normal	eQTL	-0.4859	beta	0.1419	Original reported SE	0.000618	0.0546	27863251	Cell	2016	HiSeq 2000	MIX	197
PIGU	20	33148346	33286594	NA	Kidney	nephrotic syndrome	eQTL	0.355083	beta	0.195652	Original reported SE	0.0727	NA	30057032	American journal of human genetics	2018	Affymetrix 2.1 ST chips	MIX	136
PIGU	20	33148346	33286594	A	Testis	normal	eQTL	0.392703	beta	0.0930712	Original reported SE	3.81e-05	NA	25954001	Science	2015	Illumina HiSeq 2000	EUR	225
ERGIC3	20	34129770	34145405	NA	Brain	normal	eQTL	-0.150625	beta	0.0563	Estimated SE	0.00882	0.915	30224808	Nature neuroscience	2018	Illumina HiSeq 2000 and 2500	MIX	93
ITCH	20	32951041	33099198	A	Blood	null	eQTL	NA	NA	NA	Estimated SE	8.06e-15	NA	bioRxiv_447367	bioRxiv	2018	Illumina HT-12v3, Illumina HT-12v4 and Illumina HT-12v4 WGDASL arrays	MIX	31684
ACSS2	20	33459949	33515765	A	Blood	normal	eQTL	NA	NA	NA	Estimated SE	0.00035	NA	24013639	Nature genetics	2013	HT12-v3 arrays, HT12-v4 arrays, and HumanRef-8 v2 arrays	MIX	5311
ACSS2	20	33459949	33515765	NA	Blood-T cell CD4+ naive	normal	eQTL	-0.3394	beta	0.155	Original reported SE	0.0285	0.0983	27863251	Cell	2016	HiSeq 2000	MIX	197
ACSS2	20	33459949	33515765	A	Blood-Neutrophils CD16+	normal	eQTL	0.02554	beta	0.0129107	Estimated SE	0.0493	0.544	27863251	Cell	2016	HiSeq 2000	MIX	197
ACSS2	20	33459949	33515765	NA	Brain-Prefrontal Cortex	normal	eQTL	NA	NA	NA	Estimated SE	0.00956	NA	28869584	Nature neuroscience	2017	Illumina HiSeq	EUR	494
NFS1	20	34255974	34287277	NA	Blood-Neutrophils CD16+	normal	eQTL	0.2629	beta	0.1417	Original reported SE	0.0636	0.599	27863251	Cell	2016	HiSeq 2000	MIX	197
FER1L4	20	34146507	34195484	NA	Brain-Prefrontal Cortex	normal	eQTL	NA	NA	NA	Estimated SE	0.0734	NA	28869584	Nature neuroscience	2017	Illumina HiSeq	EUR	494
TP53INP2	20	33292143	33301243	NA	Blood	eczema	eQTL	0.099308	beta	0.04569	Original reported SE	0.0297	NA	25951796	Nature communications	2015	Affymetrix U133 Plus 2.0 GeneChip	EUR	240
TP53INP2	20	33292143	33301243	A	Blood	null	eQTL	NA	NA	NA	Estimated SE	1.03e-50	NA	bioRxiv_447367	bioRxiv	2018	Illumina HT-12v3, Illumina HT-12v4 and Illumina HT-12v4 WGDASL arrays	MIX	31684
TP53INP2	20	33292143	33301243	NA	Blood-B cell	normal	eQTL	-0.1869	beta	0.03584	Original reported SE	3.57e-07	NA	22446964	Nature genetics	2012	HumanHT-12 v4 BeadChips	EUR	288
TP53INP2	20	33292143	33301243	G	Blood-T cell CD4+ naive	normal	eQTL	0.0711	beta	0.033911	Estimated SE	0.0373	0.408	27863251	Cell	2016	HiSeq 2000	MIX	197
TP53INP2	20	33292143	33301243	A	Blood-T cell CD4+ naive	normal	eQTL	0.05515	beta	0.0231991	Estimated SE	0.0184	0.428	27863251	Cell	2016	HiSeq 2000	MIX	197
TP53INP2	20	33292143	33301243	A	Blood-Neutrophils CD16+	normal	eQTL	-0.0135	beta	0.00808853	Estimated SE	0.0967	0.666	27863251	Cell	2016	HiSeq 2000	MIX	197
TP53INP2	20	33292143	33301243	NA	Blood-Neutrophils CD16+	normal	eQTL	-0.3039	beta	0.1437	Original reported SE	0.0344	0.51	27863251	Cell	2016	HiSeq 2000	MIX	197
TP53INP2	20	33292143	33301243	A	Thyroid Gland	normal	eQTL	-0.187052	beta	0.0411037	Original reported SE	7.51e-06	NA	25954001	Science	2015	Illumina HiSeq 2000	EUR	399
TP53INP2	20	33292143	33301243	G	Lymphocyte	normal	eQTL	0.434025	beta	0.066978	Original reported SE	9.17e-11	NA	25951796	Nature communications	2015	Affymetrix HGC U133 Plus 2.0 GeneChip	EUR	368
DYNLRB1	20	33104214	33128762	A	Blood	null	eQTL	NA	NA	NA	Estimated SE	0.00903	NA	bioRxiv_447367	bioRxiv	2018	Illumina HT-12v3, Illumina HT-12v4 and Illumina HT-12v4 WGDASL arrays	MIX	31684
PROCR	20	33759875	33804043	A	Blood	null	eQTL	NA	NA	NA	Estimated SE	4.64e-06	NA	bioRxiv_447367	bioRxiv	2018	Illumina HT-12v3, Illumina HT-12v4 and Illumina HT-12v4 WGDASL arrays	MIX	31684
PROCR	20	33759875	33804043	NA	Blood-Monocyte	LPS exposure 24h	eQTL	-3.03856	t-statistic	1.00312	Estimated SE	0.0026	0.103	24604202	Science	2014	Illumina HumanHT-12 v4 BeadChip	EUR	432
PROCR	20	33759875	33804043	NA	Blood-Monocyte	IFN-alpha exposure	eQTL	-4.5932	t-statistic	1.00412	Estimated SE	6.25e-06	0.000515	24604202	Science	2014	Illumina HumanHT-12 v4 BeadChip	EUR	432
MAP1LC3A	20	33134658	33148149	NA	Blood	sepsis	eQTL	-0.276584	beta	0.0537178	Estimated SE	5.46e-07	0.000283	26917434	The Lancet. Respiratory medicine	2016	Illumina Human-HT-12 version 4 Expression BeadChips	EUR	240
MAP1LC3A	20	33134658	33148149	A	Blood	normal	eQTL	-0.313064	beta	0.0428959	Original reported SE	2.59e-12	NA	25954001	Science	2015	Illumina HiSeq 2000	EUR	369
MAP1LC3A	20	33134658	33148149	A	Blood	normal	eQTL	-0.809262	beta	0.0406157	Original reported SE	2.5e-88	NA	28065468	American journal of human genetics	2017	Illumina Whole-Genome Expression BeadChips	MIX	2765
MAP1LC3A	20	33134658	33148149	A	Blood	null	eQTL	NA	NA	NA	Estimated SE	0	NA	bioRxiv_447367	bioRxiv	2018	Illumina HT-12v3, Illumina HT-12v4 and Illumina HT-12v4 WGDASL arrays	MIX	31684
MAP1LC3A	20	33134658	33148149	NA	Blood-T cell CD4+ naive	normal	eQTL	-0.3193	beta	0.1554	Original reported SE	0.0399	0.611	27863251	Cell	2016	HiSeq 2000	MIX	197
MAP1LC3A	20	33134658	33148149	NA	Blood-Monocyte	IFN-alpha exposure	eQTL	-3.06173	t-statistic	1.00178	Estimated SE	0.00238	0.0826	24604202	Science	2014	Illumina HumanHT-12 v4 BeadChip	EUR	432
MAP1LC3A	20	33134658	33148149	NA	Blood-Monocyte	LPS exposure 24h	eQTL	-3.35488	t-statistic	1.00384	Estimated SE	0.000904	0.0461	24604202	Science	2014	Illumina HumanHT-12 v4 BeadChip	EUR	432
MAP1LC3A	20	33134658	33148149	NA	Blood-Monocyte	normal	eQTL	-3.81781	t-statistic	1.00157	Estimated SE	0.000158	0.00955	24604202	Science	2014	Illumina HumanHT-12 v4 BeadChip	EUR	432
MAP1LC3A	20	33134658	33148149	NA	Blood-Monocytes CD14+	normal	eQTL	-0.6094	beta	0.1404	Original reported SE	1.42e-05	0.000439	27863251	Cell	2016	HiSeq 2000	MIX	197
MAP1LC3A	20	33134658	33148149	NA	Blood-Neutrophils CD16+	normal	eQTL	-0.8633	beta	0.1362	Original reported SE	2.35e-10	4.81e-09	27863251	Cell	2016	HiSeq 2000	MIX	197
MAP1LC3A	20	33134658	33148149	A	Testis	normal	eQTL	-0.417407	beta	0.0822455	Original reported SE	9.26e-07	NA	25954001	Science	2015	Illumina HiSeq 2000	EUR	225
MAP1LC3A	20	33134658	33148149	A	Thyroid Gland	normal	eQTL	-0.20719	beta	0.0493536	Original reported SE	3.46e-05	NA	25954001	Science	2015	Illumina HiSeq 2000	EUR	399
PHF20	20	34359896	34538292	NA	Blood-Neutrophils CD16+	normal	eQTL	-0.3475	beta	0.1423	Original reported SE	0.0146	0.729	27863251	Cell	2016	HiSeq 2000	MIX	197
EIF6	20	33866714	33872788	A	Blood	null	eQTL	NA	NA	NA	Estimated SE	9.08e-18	NA	bioRxiv_447367	bioRxiv	2018	Illumina HT-12v3, Illumina HT-12v4 and Illumina HT-12v4 WGDASL arrays	MIX	31684
EIF6	20	33866714	33872788	NA	Blood-Monocyte	LPS exposure 2h	eQTL	-3.35553	t-statistic	1.00684	Estimated SE	0.000934	0.0623	24604202	Science	2014	Illumina HumanHT-12 v4 BeadChip	EUR	432
EIF6	20	33866714	33872788	NA	Blood-Monocyte	LPS exposure 24h	eQTL	-3.70674	t-statistic	1.00456	Estimated SE	0.000253	0.0163	24604202	Science	2014	Illumina HumanHT-12 v4 BeadChip	EUR	432
ROMO1	20	34287194	34288906	NA	Blood-Neutrophils CD16+	normal	eQTL	0.2631	beta	0.1429	Original reported SE	0.0655	0.139	27863251	Cell	2016	HiSeq 2000	MIX	197
ROMO1	20	34287194	34288906	NA	Brain-Prefrontal Cortex	normal	eQTL	NA	NA	NA	Estimated SE	0.0438	NA	28869584	Nature neuroscience	2017	Illumina HiSeq	EUR	494
EDEM2	20	33703167	33735139	A	Blood	null	eQTL	NA	NA	NA	Estimated SE	3.77e-26	NA	bioRxiv_447367	bioRxiv	2018	Illumina HT-12v3, Illumina HT-12v4 and Illumina HT-12v4 WGDASL arrays	MIX	31684
EDEM2	20	33703167	33735139	NA	Blood-T cell CD4+ naive	normal	eQTL	0.2689	beta	0.1553	Original reported SE	0.0833	0.333	27863251	Cell	2016	HiSeq 2000	MIX	197
EDEM2	20	33703167	33735139	NA	Blood-Monocyte	LPS exposure 2h	eQTL	2.71893	t-statistic	1.00461	Estimated SE	0.00707	0.249	24604202	Science	2014	Illumina HumanHT-12 v4 BeadChip	EUR	432
EDEM2	20	33703167	33735139	NA	Blood-Monocyte	normal	eQTL	3.51866	t-statistic	1.00117	Estimated SE	0.000487	0.025	24604202	Science	2014	Illumina HumanHT-12 v4 BeadChip	EUR	432
EDEM2	20	33703167	33735139	NA	Blood-Monocyte	IFN-alpha exposure	eQTL	-3.96318	t-statistic	1.00317	Estimated SE	9.1e-05	0.00557	24604202	Science	2014	Illumina HumanHT-12 v4 BeadChip	EUR	432
EDEM2	20	33703167	33735139	NA	Brain-Prefrontal Cortex	normal	eQTL	NA	NA	NA	Estimated SE	0.00515	NA	28869584	Nature neuroscience	2017	Illumina HiSeq	EUR	494
EDEM2	20	33703167	33735139	NA	Brain-Prefrontal Cortex	schizophrenia, mood disorder and normal	eQTL	-0.0485434	beta	0.0161669	Estimated SE	0.00282	0.11	27668389	Nature neuroscience	2016	HiSeq 2500	EUR	467
EDEM2	20	33703167	33735139	NA	Brain-Prefrontal Cortex	schizophrenia, mood disorder and normal	eQTL	-0.0941052	beta	0.0258833	Estimated SE	0.000308	0.0399	27668389	Nature neuroscience	2016	HiSeq 2500	EUR	467
EDEM2	20	33703167	33735139	NA	Kidney	nephrotic syndrome	eQTL	-0.256383	beta	0.153673	Original reported SE	0.0985	NA	30057032	American journal of human genetics	2018	Affymetrix 2.1 ST chips	MIX	136
UQCC1	20	33890369	33999834	A	Blood	null	eQTL	NA	NA	NA	Estimated SE	0.00184	NA	bioRxiv_447367	bioRxiv	2018	Illumina HT-12v3, Illumina HT-12v4 and Illumina HT-12v4 WGDASL arrays	MIX	31684
UQCC1	20	33890369	33999834	NA	Blood-Monocyte	normal	eQTL	2.7068	t-statistic	1.00083	Estimated SE	0.00711	0.191	24604202	Science	2014	Illumina HumanHT-12 v4 BeadChip	EUR	432
UQCC1	20	33890369	33999834	NA	Blood-Monocyte	LPS exposure 24h	eQTL	2.95306	t-statistic	1.00293	Estimated SE	0.00341	0.125	24604202	Science	2014	Illumina HumanHT-12 v4 BeadChip	EUR	432
UQCC1	20	33890369	33999834	NA	Blood-Monocyte	IFN-alpha exposure	eQTL	3.16911	t-statistic	1.00183	Estimated SE	0.00167	0.063	24604202	Science	2014	Illumina HumanHT-12 v4 BeadChip	EUR	432
MMP24	20	33814493	33864801	A	Blood	null	eQTL	NA	NA	NA	Estimated SE	3.98e-05	NA	bioRxiv_447367	bioRxiv	2018	Illumina HT-12v3, Illumina HT-12v4 and Illumina HT-12v4 WGDASL arrays	MIX	31684
MMP24	20	33814493	33864801	NA	Kidney	nephrotic syndrome	eQTL	0.306427	beta	0.183215	Original reported SE	0.0977	NA	30057032	American journal of human genetics	2018	Affymetrix 2.1 ST chips	MIX	136
CPNE1	20	34213953	34252878	NA	Brain-Prefrontal Cortex	schizophrenia, mood disorder and normal	eQTL	-0.083263	beta	0.0265496	Estimated SE	0.00182	0.155	27668389	Nature neuroscience	2016	HiSeq 2500	EUR	467
TRPC4AP	20	33590207	33680610	A	Blood	normal	eQTL	0.306672	beta	0.0389122	Original reported SE	3.2e-15	NA	28065468	American journal of human genetics	2017	Illumina Whole-Genome Expression BeadChips	MIX	2765
TRPC4AP	20	33590207	33680610	A	Blood	normal	eQTL	NA	NA	NA	Estimated SE	1.76e-44	NA	24013639	Nature genetics	2013	HT12-v3 arrays, HT12-v4 arrays, and HumanRef-8 v2 arrays	MIX	5311
TRPC4AP	20	33590207	33680610	A	Blood	null	eQTL	NA	NA	NA	Estimated SE	3.3e-109	NA	bioRxiv_447367	bioRxiv	2018	Illumina HT-12v3, Illumina HT-12v4 and Illumina HT-12v4 WGDASL arrays	MIX	31684
TRPC4AP	20	33590207	33680610	G	Blood-Neutrophils CD16+	normal	eQTL	-0.0116	beta	0.00605396	Estimated SE	0.0568	0.523	27863251	Cell	2016	HiSeq 2000	MIX	197
TRPC4AP	20	33590207	33680610	A	Peripheral Nervous System	normal	eQTL	0.170263	beta	0.0445077	Original reported SE	0.000159	NA	25954001	Science	2015	Illumina HiSeq 2000	EUR	361
RBM12	20	34236847	34252878	A	Blood	null	eQTL	NA	NA	NA	Estimated SE	0.0382	NA	bioRxiv_447367	bioRxiv	2018	Illumina HT-12v3, Illumina HT-12v4 and Illumina HT-12v4 WGDASL arrays	MIX	31684
MYH7B	20	33563206	33590240	A	Blood	null	eQTL	NA	NA	NA	Estimated SE	0.000375	NA	bioRxiv_447367	bioRxiv	2018	Illumina HT-12v3, Illumina HT-12v4 and Illumina HT-12v4 WGDASL arrays	MIX	31684
MYH7B	20	33563206	33590240	NA	Blood-T cell CD4+ naive	normal	eQTL	-0.2836	beta	0.1555	Original reported SE	0.0683	0.0106	27863251	Cell	2016	HiSeq 2000	MIX	197
GSS	20	33516235	33543830	A	Blood	null	eQTL	NA	NA	NA	Estimated SE	2.41e-07	NA	bioRxiv_447367	bioRxiv	2018	Illumina HT-12v3, Illumina HT-12v4 and Illumina HT-12v4 WGDASL arrays	MIX	31684
GSS	20	33516235	33543830	NA	Blood-T cell CD4+ naive	normal	eQTL	0.3234	beta	0.1554	Original reported SE	0.0374	0.723	27863251	Cell	2016	HiSeq 2000	MIX	197
GSS	20	33516235	33543830	A	Blood-Monocytes CD14+	normal	eQTL	-0.06412	beta	0.0316616	Estimated SE	0.0442	0.538	27863251	Cell	2016	HiSeq 2000	MIX	197
GSS	20	33516235	33543830	NA	Brain-Prefrontal Cortex	normal	eQTL	NA	NA	NA	Estimated SE	0.00287	NA	28869584	Nature neuroscience	2017	Illumina HiSeq	EUR	494
GSS	20	33516235	33543830	A	Esophagus	normal	eQTL	0.182092	beta	0.0460211	Original reported SE	9.55e-05	NA	25954001	Science	2015	Illumina HiSeq 2000	EUR	358
GSS	20	33516235	33543830	A	Skin	normal	eQTL	0.178665	beta	0.0440237	Original reported SE	6.11e-05	NA	25954001	Science	2015	Illumina HiSeq 2000	EUR	414
GSS	20	33516235	33543830	A	Skin	normal	eQTL	0.241391	beta	0.052926	Original reported SE	7.59e-06	NA	25954001	Science	2015	Illumina HiSeq 2000	EUR	335
EIF2S2	20	32676115	32700049	A	Blood	null	eQTL	NA	NA	NA	Estimated SE	0.00165	NA	bioRxiv_447367	bioRxiv	2018	Illumina HT-12v3, Illumina HT-12v4 and Illumina HT-12v4 WGDASL arrays	MIX	31684
EIF2S2	20	32676115	32700049	NA	Blood-Monocyte	IFN-alpha exposure	eQTL	-3.42689	t-statistic	1.00241	Estimated SE	0.000689	0.031	24604202	Science	2014	Illumina HumanHT-12 v4 BeadChip	EUR	432
EIF2S2	20	32676115	32700049	NA	Blood-Neutrophils CD16+	normal	eQTL	0.3166	beta	0.1424	Original reported SE	0.0262	0.269	27863251	Cell	2016	HiSeq 2000	MIX	197
NCOA6	20	33276901	33413454	A	Adipose-Visceral	normal	eQTL	0.250543	beta	0.0588227	Original reported SE	2.86e-05	NA	25954001	Science	2015	Illumina HiSeq 2000	EUR	313
NCOA6	20	33276901	33413454	A	Blood	normal	eQTL	NA	NA	NA	Estimated SE	1.04e-08	NA	24013639	Nature genetics	2013	HT12-v3 arrays, HT12-v4 arrays, and HumanRef-8 v2 arrays	MIX	5311
NCOA6	20	33276901	33413454	A	Blood	null	eQTL	NA	NA	NA	Estimated SE	5.94e-64	NA	bioRxiv_447367	bioRxiv	2018	Illumina HT-12v3, Illumina HT-12v4 and Illumina HT-12v4 WGDASL arrays	MIX	31684
NCOA6	20	33276901	33413454	G	Blood-Monocytes CD14+	normal	eQTL	0.0186	beta	0.00984799	Estimated SE	0.0604	0.536	27863251	Cell	2016	HiSeq 2000	MIX	197
NCOA6	20	33276901	33413454	A	Brain-Cerebellar Hemisphere	normal	eQTL	0.394312	beta	0.0908618	Original reported SE	3.34e-05	NA	25954001	Science	2015	Illumina HiSeq 2000	EUR	125
NCOA6	20	33276901	33413454	A	Brain-Cerebellum	normal	eQTL	0.41281	beta	0.0673115	Original reported SE	1.21e-08	NA	25954001	Science	2015	Illumina HiSeq 2000	EUR	154
NCOA6	20	33276901	33413454	NA	Brain-Prefrontal Cortex	normal	eQTL	NA	NA	NA	Estimated SE	2.01e-07	NA	28869584	Nature neuroscience	2017	Illumina HiSeq	EUR	494
NCOA6	20	33276901	33413454	A	Esophagus	normal	eQTL	0.205584	beta	0.0496491	Original reported SE	5.36e-05	NA	25954001	Science	2015	Illumina HiSeq 2000	EUR	213
NCOA6	20	33276901	33413454	A	Esophagus	normal	eQTL	0.178504	beta	0.03881	Original reported SE	6.33e-06	NA	25954001	Science	2015	Illumina HiSeq 2000	EUR	358
NCOA6	20	33276901	33413454	A	Esophagus	normal	eQTL	0.272951	beta	0.0378431	Original reported SE	5.03e-12	NA	25954001	Science	2015	Illumina HiSeq 2000	EUR	335
NCOA6	20	33276901	33413454	NA	Kidney	nephrotic syndrome	eQTL	0.254714	beta	0.130274	Original reported SE	0.0527	NA	30057032	American journal of human genetics	2018	Affymetrix 2.1 ST chips	MIX	166
NCOA6	20	33276901	33413454	A	Lung	normal	eQTL	0.130233	beta	0.0311913	Original reported SE	3.85e-05	NA	25954001	Science	2015	Illumina HiSeq 2000	EUR	383
NCOA6	20	33276901	33413454	A	Testis	normal	eQTL	0.22363	beta	0.0444511	Original reported SE	1.14e-06	NA	25954001	Science	2015	Illumina HiSeq 2000	EUR	225
NCOA6	20	33276901	33413454	A	Skin	normal	eQTL	0.187669	beta	0.034859	Original reported SE	1.53e-07	NA	25954001	Science	2015	Illumina HiSeq 2000	EUR	335
NCOA6	20	33276901	33413454	A	Stomach	normal	eQTL	0.27509	beta	0.0619956	Original reported SE	1.5e-05	NA	25954001	Science	2015	Illumina HiSeq 2000	EUR	237
NCOA6	20	33276901	33413454	A	Thyroid Gland	normal	eQTL	0.245567	beta	0.0430497	Original reported SE	2.59e-08	NA	25954001	Science	2015	Illumina HiSeq 2000	EUR	399
NCOA6	20	33276901	33413454	A	Peripheral Nervous System	normal	eQTL	0.242233	beta	0.0480698	Original reported SE	8.18e-07	NA	25954001	Science	2015	Illumina HiSeq 2000	EUR	361
ASIP	20	32782375	32857150	A	Skin	normal	eQTL	0.255814	beta	0.0517324	Original reported SE	1.19e-06	NA	25954001	Science	2015	Illumina HiSeq 2000	EUR	414
HMGB3P1	20	33421378	33422265	NA	Kidney	nephrotic syndrome	eQTL	-0.506531	beta	0.203749	Original reported SE	0.0146	NA	30057032	American journal of human genetics	2018	Affymetrix 2.1 ST chips	MIX	136
MT1P3	20	33805812	33805988	NA	Brain-Prefrontal Cortex	normal	eQTL	NA	NA	NA	Estimated SE	0.0843	NA	28869584	Nature neuroscience	2017	Illumina HiSeq	EUR	494
MIR4755	20	32636925	32636996	NA	Blood-Neutrophils CD16+	normal	eQTL	-0.328	beta	0.1432	Original reported SE	0.022	0.447	27863251	Cell	2016	HiSeq 2000	MIX	197
FAM83C-AS1	20	33873054	33873559	NA	Kidney	nephrotic syndrome	eQTL	-0.268995	beta	0.143882	Original reported SE	0.0638	NA	30057032	American journal of human genetics	2018	Affymetrix 2.1 ST chips	MIX	166
AL121753.1	20	33855688	33867846	NA	Blood-Neutrophils CD16+	normal	eQTL	0.3284	beta	0.1418	Original reported SE	0.0205	0.00909	27863251	Cell	2016	HiSeq 2000	MIX	197
RPL37P1	20	34176246	34176529	A	Stomach	normal	eQTL	0.30913	beta	0.0686693	Original reported SE	1.14e-05	NA	25954001	Science	2015	Illumina HiSeq 2000	EUR	237

[truncated: 6 more sheets: rs11546155-mQTL, rs11546155-hQTL, rs6119534-eQTL, rs6119534-mQTL, rs6119534-hQTL, Лист1]
