# Supplementary material for: The Link between Type 2 Diabetes Mellitus and the Polymorphisms of Glutathione-Metabolizing Genes Suggests a New Hypothesis Explaining Disease Initiation and Progression
Source: Life (Basel). 2021 Aug 28;11(9):886. doi: 10.3390/life11090886 (PMC8466482; doi:10.3390/life11090886)
Supplement: Supplementary file 1 [file life-11-00886-s001.zip › Suppl Table S7.xlsx]

## Sheet: Лист1
	Supplementary table 7. Pancreatic eQTLs for SNPs that are in strong linkage disequilibrium (r²>0.8) with polymorphisms rs11546155 and rs6119534 of GGT7 and rs13041792 of GSS
				rs13041792 of GSS
chr	pos (hg38)	LD	LD	variant	Ref	Alt	EDEM2	PROCR	MYH7B	FER1L4	TRPC4AP	MAP1LC3A	GENCODE	dbSNP
		(r²)	(D')				P-values for eQTLs:						genes	func annot
20	34950918	0.97	0.99	rs11167248	G	T	2.1e-18	5.1e-10	9.3e-8	-	-	-	GSS	intronic
20	34952197	0.97	0.99	rs2025096	G	A	2.1e-18	5.1e-10	9.3e-8	-	-	-	GSS	intronic
20	34957252	1	1	rs13041792	G	A	1.3e-18	2.8e-10	4.4e-8	-	-	-	1.4kb 5' of GSS	intronic
20	34959830	0.98	1	rs6088662	T	G	6.7e-18	9.6e-10	4.9e-7	0.00012	-	-	4kb 5' of GSS	intronic
20	34962143	0.98	0.99	rs11698868	C	T	1.3e-18	2.8e-10	4.4e-8	-	-	-	6.3kb 5' of GSS	intronic
20	34964809	0.98	0.99	rs6119548	A	G	1.3e-18	2.8e-10	4.4e-8	-	-	-	9kb 5' of GSS	intronic
20	34966958	0.98	0.99	rs6120772	C	T	1.3e-18	2.8e-10	4.4e-8	-	-	-	8.4kb 5' of MYH7B	intronic
20	34969761	0.95	0.98	rs6120775	T	C	1.3e-18	2.8e-10	4.4e-8	-	-	-	5.6kb 5' of MYH7B	intronic
20	34975808	0.88	0.97	rs7261969	C	T	5.0e-22	9.6e-13	4.0e-9	-	0.00015	-	MYH7B	intronic
20	34978919	0.87	0.97	rs6088667	T	G	2.7e-21	2.6e-12	4.7e-9	-	-	-	MYH7B	intronic
20	34986962	0.83	0.93	rs3746446	T	C	6.2e-21	2.4e-12	6.2e-8	-	0.000038	-	MYH7B	synonymous
20	34990448	0.82	0.93	rs3746444	A	G	6.2e-21	2.4e-12	6.2e-8	-	0.000038	-	MIR499A	intronic
20	34994086	0.84	0.93	rs7268266	T	C	1.2e-21	8.7e-13	5.4e-8	-	0.000021	-	MYH7B	intronic
20	34995913	0.82	0.93	rs6120788	C	T	1.3e-19	3.1e-11	3.2e-7	-	0.000017	-	MYH7B	intronic
20	34998390	0.81	0.93	rs3746436	C	T	8.6e-20	4.2e-12	1.2e-7	-	0.000011	-	MYH7B	synonymous
20	34999395	0.81	0.93	rs3746435	G	C	8.6e-20	4.2e-12	1.2e-7	-	0.000011	-	MYH7B	missense
20	35003788	0.8	0.91	rs752075	C	A	3.7e-20	6.1e-13	1.9e-8	-	0.000036	-	TRPC4AP	intronic
				rs11546155 of GGT7
chr	pos (hg38)	LD	LD	variant	Ref	Alt	EDEM2	PROCR	MYH7B	FER1L4	TRPC4AP	MAP1LC3A	GENCODE	dbSNP
		(r²)	(D')				P-values for eQTLs:						genes	func annot
20	34863345	1	1	rs11546155	G	A	-	-	-	-	-	-	GGT7	synonymous
				rs6119534 of GGT7
chr	pos (hg38)	LD	LD	variant	Ref	Alt	EDEM2	PROCR	MYH7B	FER1L4	TRPC4AP	MAP1LC3A	GENCODE	dbSNP
		(r²)	(D')				P-values for eQTLs:						genes	func annot
20	34719100	0.82	0.94	rs6119512	T	C	3.4e-8	0.000029	0.00023	-	-	0.000035	NCOA6	intronic
20	34723195	0.82	0.94	rs6058111	T	C	7.5e-9	0.000022	-	-	-	0.000039	NCOA6	intronic
20	34725762	0.82	0.94	rs6088590	T	C	5.7e-9	0.000014	-	-	-	0.000026	NCOA6	intronic
20	34725936	0.82	0.94	rs6120705	T	C	4.0e-9	0.000012	0.00014	-	-	0.000026	NCOA6	intronic
20	34729858	0.82	0.94	rs6087623	C	G	7.5e-9	0.000022	-	-	-	0.000039	NCOA6	intronic
20	34740220	0.82	0.94	rs6119516	C	T	1.5e-9	0.0000052	0.00010	-	-	0.000038	NCOA6	intronic
20	34745236	0.82	0.94	rs3787222	T	A	3.4e-8	0.000029	0.00023	-	-	0.000035	NCOA6	intronic
20	34747722	0.82	0.94	rs6120708	G	A	7.5e-9	0.000022	-	-	-	0.000039	NCOA6	intronic
20	34754674	0.82	0.94	rs6087625	G	A	3.4e-8	0.000029	0.00023	-	-	0.000035	NCOA6	intronic
20	34756792	0.82	0.94	rs1998028	A	T	3.4e-8	0.000029	0.00023	-	-	0.000035	NCOA6	intronic
20	34759525	0.82	0.94	rs6087626	C	T	4.0e-9	0.000016	0.00015	-	-	0.000027	NCOA6	intronic
20	34768708	0.87	0.94	rs2295353	C	T	3.2e-8	0.000034	0.00023	-	-	0.000042	NCOA6	intronic
20	34768738	0.87	0.94	rs2295354	T	C	3.2e-8	0.000034	0.00023	-	-	0.000042	NCOA6	intronic
20	34769844	0.83	0.95	rs199611443	TTGA	T	NA	NA	NA	NA	NA	NA	NCOA6	intronic
20	34769845	0.85	0.94	rs36024514	TGAC	T	0.0000021	0.000072	0.000032	-	-	0.00015	NCOA6	intronic
20	34770696	0.87	0.95	rs6088595	T	A	0.0000021	0.000072	0.000032	-	-	0.00015	NCOA6	intronic
20	34771098	0.87	0.95	rs13040449	T	A	1.5e-7	0.000091	0.00020	-	-	0.00015	NCOA6	intronic
20	34772982	0.83	0.95	rs2180276	T	A	2.2e-9	0.000011	0.00020	-	-	0.000051	NCOA6	intronic
20	34776852	0.88	0.95	rs6120723	C	T	3.6e-9	0.000015	0.00014	-	-	0.000031	NCOA6	intronic
20	34778667	0.87	0.93	rs6120724	C	T	3.6e-9	0.000015	0.00014	-	-	0.000031	NCOA6	intronic
20	34778678	0.87	0.93	rs6119522	G	A	3.6e-9	0.000015	0.00014	-	-	0.000031	NCOA6	intronic
20	34778838	0.84	0.92	rs13041059	A	G	3.6e-9	0.000015	0.00014	-	-	0.000031	NCOA6	intronic
20	34785053	0.9	0.97	rs7267403	C	A	6.9e-9	6.9e-9	-	-	-	0.000046	NCOA6	intronic
20	34786010	0.91	0.97	rs6119524	C	T	6.9e-9	0.000026	-	-	-	0.000046	NCOA6	intronic
20	34786299	0.91	0.97	rs6120727	T	C	3.6e-9	0.000015	0.00014	-	-	0.000031	NCOA6	intronic
20	34788520	0.91	0.97	rs28542147	G	A	3.6e-9	0.000015	0.00014	-	-	0.000015	NCOA6	intronic
20	34790930	0.89	0.97	rs6088607	C	T	6.9e-9	0.000026	-	-	-	0.000046	NCOA6	intronic
20	34797299	0.91	0.97	rs6120730	G	C	3.2e-8	0.000034	0.00023	-	-	0.000042	NCOA6	intronic
20	34807137	0.89	0.97	rs55753039	C	T	3.7e-8	0.000034	-	-	-	0.000067	NCOA6	intronic
20	34812671	0.9	0.97	rs6088615	T	C	NA	NA	NA	NA	NA	NA	NCOA6	intronic
20	34813110	0.91	0.97	rs7262834	G	T	3.7e-8	0.000034	-	-	-	0.000067	NCOA6	intronic
20	34815706	0.91	0.97	rs6087631	T	C	6.9e-9	0.000026	-	-	-	0.000046	NCOA6	intronic
20	34816127	0.91	0.97	rs6119530	A	G	3.2e-8	0.000034	0.00023	-	-	0.000042	NCOA6	intronic
20	34819901	0.91	0.97	rs6087632	A	C	1.0e-8	0.000025	0.00009	-	-	0.000026	NCOA6	intronic
20	34820233	0.91	0.96	rs6088617	G	A	1.0e-8	0.000025	0.00009	-	-	0.000026	NCOA6	intronic
20	34824219	0.91	0.97	rs6088620	A	G	6.9e-9	0.000026	-	-	-	0.000046	NCOA6	intronic
20	34831877	0.91	0.97	rs10048849	C	T	1.0e-8	0.000025	0.00009	-	-	0.000026	6.2kb 5' of NCOA6
20	34837997	0.89	0.96	rs12626122	A	G	0.0000031	0.000086	0.000058	-	-	-	6.7kb 3' of GGT7
20	34838009	0.89	0.96	rs12625149	G	T	0.0000028	0.000095	0.000039	-	-	-	6.7kb 3' of GGT7
20	34845826	0.81	0.94	rs55845370	A	G	0.000059	-	0.00018	-	-	-	GGT7	intronic
20	34846449	0.89	0.95	rs56244533	T	A	2.9e-7	0.0000021	0.000071	-	-	-	GGT7	intronic
20	34848024	0.93	0.98	rs6120742	T	C	1.4e-7	0.0000015	0.00015	-	-	-	GGT7	intronic
20	34849049	0.95	0.99	rs6088624	T	A	3.9e-8	0.0000093	0.000091	-	-	0.000099	GGT7	intronic
20	34849818	0.95	0.99	rs2076668	G	A	1.1e-8	0.0000014	0.000053	-	-	-	GGT7	intronic
20	34853454	1	1	rs6119534	C	T	6.1e-8	0.000027	0.000043	-	-	-	GGT7	intronic
20	34854335	0.97	1	rs6119535	A	C	1.8e-7	0.0000022	0.00012	-	-	-	GGT7	intronic
20	34856063	0.97	1	rs6087639	G	A	4.6e-8	0.0000057	0.000083	-	-	0.00016	GGT7	intronic
20	34861888	0.96	0.99	rs11698977	C	T	2.7e-8	0.000003	0.000053	-	-	-	GGT7	intronic
20	34861936	0.95	0.99	rs11698996	C	G	0.0000048	0.000015	0.000035	-	-	-	GGT7	intronic
20	34861966	0.97	1	rs6120747	T	C	2.2e-7	0.000010	0.00019	-	-	-	GGT7	intronic
20	34865112	0.95	0.98	rs35393655	G	A	2.5e-8	0.0000032	0.0000075	-	-	0.000066	GGT7	intronic
20	34865196	0.95	0.98	rs11696546	C	G	2.5e-8	0.0000032	0.0000075	-	-	0.000066	GGT7	intronic
20	34870481	0.95	0.98	rs6120748	T	G	NA	NA	NA	NA	NA	NA	GGT7	intronic
20	34877486	0.95	0.98	rs6120750	A	C	1.0e-7	0.0000042	0.000013	-	-	-	ACSS2	intronic
20	34900276	0.82	0.92	rs67159833	T	C	0.0000033	0.0000032	0.000017	-	-	-	ACSS2	intronic
20	34935352	0.87	0.94	rs2236270	G	T	1.0e-7	0.0000042	0.000013	-	-	-	GSS	intronic
