# Supplementary material for: The Link between Type 2 Diabetes Mellitus and the Polymorphisms of Glutathione-Metabolizing Genes Suggests a New Hypothesis Explaining Disease Initiation and Progression
Source: Life (Basel). 2021 Aug 28;11(9):886. doi: 10.3390/life11090886 (PMC8466482; doi:10.3390/life11090886)
Supplement: Supplementary file 1 [file life-11-00886-s001.zip › Suppl Table S9.xls]

## Sheet: Legend
		Supplementary table 9
		Predicted transcription factors co-regulating expression of MAP1LC3A, MYH7B, CPNE1 and EDEM2 genes
	List 1	Legend
	List 2	107 TFs co-regulating expression of MAP1LC3A, MYH7B, CPNE1 and EDEM2 genes, as predicted by hTFtarget (http://bioinfo.life.hust.edu.cn/hTFtarget/). Column "Datasets" depicts the number of datasets on which factors were predicted.
	List 3	99 seleсted transcription factors that expressed in the pancreas (assessed by Tissue Expression database) at a relatively high level (a TPM cutoff value higher than 0.003, as assessed by the GTEx portal). Molecular function annotations for the TFs (Gene Ontology, UniProt and GeneCards) are also shown

## Sheet: TFs co-regulating EDEM2-MYH7B-M
Index	Query genes	# Input	# Found	TF	# Datasets
55	MAP1LC3A, CPNE1, MYH7B	4	3	CTCF	311
17	MAP1LC3A, MYH7B, CPNE1, EDEM2	4	4	SPI1	254
93	MAP1LC3A, CPNE1	4	2	FOXA1	97
56	MAP1LC3A, CPNE1, EDEM2	4	3	EP300	93
7	MAP1LC3A, MYH7B, CPNE1, EDEM2	4	4	BRD4	85
85	CPNE1, EDEM2	4	2	MYC	81
112	CPNE1, MYH7B	4	2	POLR2A	54
42	MAP1LC3A, CPNE1, EDEM2	4	3	RUNX1	48
25	MAP1LC3A, MYH7B, CPNE1, EDEM2	4	4	RAD21	41
19	MAP1LC3A, MYH7B, CPNE1, EDEM2	4	4	TP53	35
131	CPNE1, EDEM2	4	2	ERG	35
117	CPNE1, EDEM2	4	2	STAT3	34
46	MAP1LC3A, CPNE1, EDEM2	4	3	JUN	30
103	MAP1LC3A, CPNE1	4	2	FOXA2	30
123	CPNE1, EDEM2	4	2	TAL1	29
91	CPNE1, EDEM2	4	2	MAX	28
22	MAP1LC3A, MYH7B, CPNE1, EDEM2	4	4	GABPA	26
90	MYH7B, EDEM2	4	2	GATA1	25
3	MAP1LC3A, MYH7B, CPNE1, EDEM2	4	4	TRIM28	21
138	CPNE1, MYH7B	4	2	PGR	21
83	CPNE1, EDEM2	4	2	ETS1	19
143	MAP1LC3A, CPNE1	4	2	E2F1	19
88	CPNE1, EDEM2	4	2	FLI1	18
100	CPNE1, EDEM2	4	2	MYCN	18
118	CPNE1, EDEM2	4	2	STAT1	18
47	MYH7B, CPNE1, EDEM2	4	3	OTX2	15
6	MAP1LC3A, MYH7B, CPNE1, EDEM2	4	4	CREB1	14
133	CPNE1, EDEM2	4	2	MYB	14
39	MAP1LC3A, CPNE1, MYH7B	4	3	SP1	13
62	MAP1LC3A, CPNE1, EDEM2	4	3	CEBPA	13
95	CPNE1, EDEM2	4	2	TCF12	13
113	CPNE1, EDEM2	4	2	CREBBP	13
127	CPNE1, MYH7B	4	2	TAF1	13
43	MAP1LC3A, CPNE1, MYH7B	4	3	KDM5B	12
50	MAP1LC3A, CPNE1, EDEM2	4	3	HDAC2	12
53	MAP1LC3A, CPNE1, EDEM2	4	3	USF1	12
66	MAP1LC3A, CPNE1, EDEM2	4	3	KLF5	12
130	CPNE1, EDEM2	4	2	NRF1	12
29	MAP1LC3A, MYH7B, CPNE1, EDEM2	4	4	ATF3	11
49	MAP1LC3A, CPNE1, EDEM2	4	3	IRF1	11
135	MAP1LC3A, EDEM2	4	2	TEAD4	11
2	MAP1LC3A, MYH7B, CPNE1, EDEM2	4	4	KDM2B	10
45	MAP1LC3A, MYH7B, EDEM2	4	3	FOXP1	10
64	MAP1LC3A, CPNE1, EDEM2	4	3	GRHL2	10
120	CPNE1, EDEM2	4	2	USF2	10
48	MAP1LC3A, CPNE1, EDEM2	4	3	NFE2	9
58	MAP1LC3A, CPNE1, MYH7B	4	3	CDK9	9
5	MAP1LC3A, MYH7B, CPNE1, EDEM2	4	4	SP2	8
9	MAP1LC3A, MYH7B, CPNE1, EDEM2	4	4	MAZ	8
16	MAP1LC3A, MYH7B, CPNE1, EDEM2	4	4	PPARG	8
139	MAP1LC3A, MYH7B	4	2	KLF1	8
11	MAP1LC3A, MYH7B, CPNE1, EDEM2	4	4	ZBTB7A	7
14	MAP1LC3A, MYH7B, CPNE1, EDEM2	4	4	SMC1A	7
67	MAP1LC3A, CPNE1, EDEM2	4	3	KLF4	7
79	CPNE1, MYH7B	4	2	TBX5	7
108	CPNE1, EDEM2	4	2	TCF3	7
129	CPNE1, EDEM2	4	2	STAT5B	7
73	MYH7B, CPNE1, EDEM2	4	3	E2F6	6
105	MYH7B, EDEM2	4	2	NEUROG2	6
15	MAP1LC3A, MYH7B, CPNE1, EDEM2	4	4	MAF	5
21	MAP1LC3A, MYH7B, CPNE1, EDEM2	4	4	BCOR	5
23	MAP1LC3A, MYH7B, CPNE1, EDEM2	4	4	FOXO3	5
34	MAP1LC3A, CPNE1, EDEM2	4	3	NKX2-1	5
37	MAP1LC3A, CPNE1, EDEM2	4	3	ZNF263	5
102	CPNE1, EDEM2	4	2	GTF2B	5
111	MAP1LC3A, CPNE1	4	2	LMNB1	5
114	CPNE1, EDEM2	4	2	HDAC1	5
119	MAP1LC3A, CPNE1	4	2	NR2F2	5
128	MAP1LC3A, CPNE1	4	2	ARNT	5
41	MAP1LC3A, CPNE1, MYH7B	4	3	NEUROD1	4
63	MAP1LC3A, CPNE1, MYH7B	4	3	MYOD1	4
71	MYH7B, CPNE1, EDEM2	4	3	EBF1	4
72	MAP1LC3A, CPNE1, EDEM2	4	3	HOXB13	4
77	MAP1LC3A, CPNE1	4	2	SUMO2	4
81	CPNE1, EDEM2	4	2	SUPT5H	4
89	MAP1LC3A, CPNE1	4	2	BRD2	4
104	CPNE1, EDEM2	4	2	JMJD1C	4
107	CPNE1, EDEM2	4	2	NR1H3	4
140	CPNE1, EDEM2	4	2	SMARCB1	4
1	MAP1LC3A, MYH7B, CPNE1, EDEM2	4	4	ZNF384	3
31	MAP1LC3A, MYH7B, CPNE1, EDEM2	4	4	ATF1	3
33	MAP1LC3A, CPNE1, EDEM2	4	3	TBX21	3
54	MYH7B, CPNE1, EDEM2	4	3	NFKB1	3
87	CPNE1, MYH7B	4	2	WDR5	3
98	MAP1LC3A, CPNE1	4	2	ZBTB2	3
110	CPNE1, EDEM2	4	2	ZEB1	3
132	CPNE1, EDEM2	4	2	ZNF18	3
136	CPNE1, EDEM2	4	2	KLF10	3
141	CPNE1, EDEM2	4	2	NR4A1	3
8	MAP1LC3A, MYH7B, CPNE1, EDEM2	4	4	PCGF1	2
10	MAP1LC3A, MYH7B, CPNE1, EDEM2	4	4	GLIS1	2
12	MAP1LC3A, MYH7B, CPNE1, EDEM2	4	4	EGR2	2
26	MAP1LC3A, MYH7B, CPNE1, EDEM2	4	4	SP4	2
28	MAP1LC3A, MYH7B, CPNE1, EDEM2	4	4	GRHL3	2
52	MAP1LC3A, MYH7B, EDEM2	4	3	EHMT2	2
60	MAP1LC3A, CPNE1, EDEM2	4	3	FOXO1	2
61	MAP1LC3A, CPNE1, EDEM2	4	3	ELF3	2
68	MAP1LC3A, CPNE1, EDEM2	4	3	RYBP	2
69	MAP1LC3A, CPNE1, MYH7B	4	3	KLF9	2
96	CPNE1, MYH7B	4	2	CTBP2	2
99	CPNE1, EDEM2	4	2	SKI	2
106	CPNE1, EDEM2	4	2	NR1H2	2
122	CPNE1, EDEM2	4	2	NFKB2	2
124	MAP1LC3A, MYH7B	4	2	TET2	2
125	CPNE1, EDEM2	4	2	YAP1	2
134	CPNE1, EDEM2	4	2	SOX4	2
137	CPNE1, MYH7B	4	2	KDM4C	2

## Sheet: 99 Tfs selected (GTEx)
TF	TF name	TF Effect
EGR2	early growth response 2	activator
FOXA1	forkhead box A1	activator
NFE2	nuclear factor, erythroid 2	activator
MYCN	MYCN proto-oncogene, bHLH transcription factor	activator
KLF1	Kruppel like factor 1	activator
GATA1	GATA binding protein 1	activator/repressor
PGR	progesterone receptor	activator/repressor
GRHL3	grainyhead like transcription factor 3	activator/repressor
TBX21	T-box transcription factor 21	repressor
TAL1	TAL bHLH transcription factor 1, erythroid differentiation factor	activator
E2F1	E2F transcription factor 1	repressor
PPARG	peroxisome proliferator activated receptor gamma	activator
ERG	ETS transcription factor ERG	activator
EBF1	sterol regulatory element binding transcription factor 1	activator
RUNX1	RUNX family transcription factor 1	activator
MAF	MAF bZIP transcription factor	activator/repressor
ZEB1	zinc finger E-box binding homeobox 1	activator/repressor
LMNB1	lamin B1	NA
SP4	Sp4 transcription factor	activator/repressor
NEUROD1	neuronal differentiation 1	activator
TET2	tet methylcytosine dioxygenase 2	NA
FLI1	Fli-1 proto-oncogene, ETS transcription factor	activator
BRD2	bromodomain containing 2	activator
JUN	Jun proto-oncogene, AP-1 transcription factor subunit	activator
TRIM28	tripartite motif containing 28	activator
USF2	upstream transcription factor 2, c-fos interacting	activator
STAT3	signal transducer and activator of transcription 3	activator
SUPT5H	SPT5 homolog, DSIF elongation factor subunit	activator/repressor
MYC	MYC proto-oncogene, bHLH transcription factor	activator/repressor
KLF10	Kruppel like factor 10	repressor
POLR2A	RNA polymerase II subunit A	activator
HDAC1	histone deacetylase 1	repressor
ELF3	E74 like ETS transcription factor 3	activator
CDK9	cyclin dependent kinase 9	activator
FOXA2	forkhead box A2	activator
STAT5B	signal transducer and activator of transcription 5B	activator
FOXO3	forkhead box O3	activator
WDR5	WD repeat domain 5	activator
NR1H2	nuclear receptor subfamily 1 group H member 2	activator
SMARCB1	SWI/SNF related, matrix associated, actin dependent regulator of chromatin, subfamily b, member 1	activator
TEAD4	TEA domain transcription factor 4	activator
KLF9	Kruppel like factor 9	activator
SUMO2	small ubiquitin like modifier 2	NA
USF1	upstream transcription factor 1	activator
SPI1	Spi-1 proto-oncogene	activator
E2F6	E2F transcription factor 6	activator
ZNF18	zinc finger protein 18	activator
RYBP	RING1 and YY1 binding protein	activator/repressor
KDM2B	lysine demethylase 2B	NA
FOXP1	forkhead box P1	repressor
IRF1	interferon regulatory factor 1	activator
CREB1	cAMP responsive element binding protein 1	activator/repressor
TAF1	TATA-box binding protein associated factor 1	repressor
ZBTB7A	zinc finger and BTB domain containing 7A	repressor
JMJD1C	jumonji domain containing 1C	activator
HDAC2	histone deacetylase 2	activator/repressor
ETS1	ETS proto-oncogene 1, transcription factor	activator
PCGF1	polycomb group ring finger 1	repressor
NR1H3	nuclear receptor subfamily 1 group H member 3	activator
ZNF263	zinc finger protein 263	repressor
GABPA	GA binding protein transcription factor subunit alpha	activator
CEBPA	CCAAT enhancer binding protein alpha	activator
KDM4C	lysine demethylase 4C	activator
KLF5	Kruppel like factor 5	activator
KLF4	Kruppel like factor 4	activator
ZBTB2	zinc finger and BTB domain containing 2	repressor
NRF1	nuclear respiratory factor 1_nuclear factor, erythroid 2 like 1	activator
BCOR	BCL6 corepressor	repressor
ATF1	activating transcription factor 1 / glial cell derived neurotrophic factor	activator
TCF12	transcription factor 12	activator
KDM5B	lysine demethylase 5B	activator/repressor
RAD21	RAD21 cohesin complex component	activator
NR4A1	nuclear receptor subfamily 4 group A member 1	activator
MAZ	MYC associated zinc finger protein	activator
NFKB2	nuclear factor kappa B subunit 2	activator
ZNF384	zinc finger protein 384	activator
SP1	Sp1 transcription factor	repressor
ATF3	activating transcription factor 3	activator/repressor
CTCF	CCCTC-binding factor	repressor
ARNT	aryl hydrocarbon receptor nuclear translocator like	repressor
STAT1	signal transducer and activator of transcription 1	activator
SKI	SKI proto-oncogene	activator/repressor
GTF2B	general transcription factor IIB	activator
CREBBP	CREB binding protein	activator
BRD4	bromodomain containing 4	activator
MAX	MYC associated factor X	activator/repressor
EHMT2	euchromatic histone lysine methyltransferase 2	repressor
EP300	E1A binding protein p300	activator
SP2	Sp2 transcription factor	activator/repressor
SMC1A	structural maintenance of chromosomes 1A	NA
SOX4	SRY-box transcription factor 4	activator
TP53	tumor protein p53	activator
GRHL2	grainyhead like transcription factor 2	activator/repressor
CTBP2	C-terminal binding protein 2	repressor
YAP1	Yes1 associated transcriptional regulator	activator
FOXO1	forkhead box O1	activator
TCF3	transcription factor 3 / transcription factor 7 like 1	activator/repressor
NR2F2	nuclear receptor subfamily 2 group F member 2	activator/repressor
NFKB1	nuclear factor kappa B subunit 1	activator/repressor
