# Supplementary material for: The Link between Type 2 Diabetes Mellitus and the Polymorphisms of Glutathione-Metabolizing Genes Suggests a New Hypothesis Explaining Disease Initiation and Progression
Source: Life (Basel). 2021 Aug 28;11(9):886. doi: 10.3390/life11090886 (PMC8466482; doi:10.3390/life11090886)
Supplement: Supplementary file 1 [file life-11-00886-s001.zip › Suppl Table S10.xlsx]

## Sheet: Legend
	Supplementary table 10
	*Functional terms enriched with a set of transcription factors that have been predicted by hTFtarget as co-regulators of EDEM2, MYH7B, MAP1LC3A and CPNE1 expression in the pancreas
	(Enrichment analysis performed by Enrichr, an interactive and collaborative HTML5 gene list enrichment analysis web tool (https://maayanlab.cloud/Enrichr/)
	Lists:
	KEGG_2019_Human:	Q-value ranked list of functional terms enriched with a set of TFs (KEGG database)
	Reactome_2016_Human:	Q-value ranked list of functional terms enriched with a set of TFs (Reactome database)
	WikiPathways_2019_Human:	Q-value ranked list of functional terms enriched with a set of TFs (WikiPathways database)
	*Terms of interest related to the development of type 2 diabetes are highlighted in yellow

## Sheet: KEGG_2019_Human
Term	P-value	Adjusted P-value	Odds Ratio	Combined Score	Genes
Transcriptional misregulation in cancer	5.91522356671029E-23	7.926399579391789E-21	32.203263403263406	1648.225103897944	ATF1;CEBPA;HDAC2;SPI1;MAX;HDAC1;JMJD1C;FOXO1;FLI1;NFKB1;RUNX1;CDK9;MYCN;MAF;ZEB1;SP1;MYC;PPARG;ERG;TCF3;TP53
Pathways in cancer	9.974754468770494E-16	6.683085494076231E-14	11.576404027821033	399.8640923735448	STAT5B;CEBPA;JUN;CREBBP;HDAC2;SPI1;CTBP2;MAX;HDAC1;STAT1;STAT3;ARNT;ETS1;FOXO1;NFKB1;RUNX1;NFKB2;SP1;MYC;E2F1;EP300;PPARG;TP53
Human T-cell leukemia virus 1 infection	3.926424137201623E-12	1.7538027812833918E-10	15.824619799139167	415.60661046300396	STAT5B;EGR2;JUN;CREBBP;SPI1;ETS1;NFKB1;NFKB2;CREB1;MYC;E2F1;EP300;TCF3;TP53
Viral carcinogenesis	2.0958410093146574E-11	7.021067381204102E-10	15.850383473527957	389.73685468354506	STAT5B;EGR2;JUN;CREBBP;HDAC2;HDAC1;GTF2B;STAT3;NFKB1;NFKB2;CREB1;EP300;TP53
Hepatitis B	2.860665820745781E-11	7.666584399598693E-10	18.040648549897238	437.9797095315216	STAT5B;EGR2;JUN;CREBBP;CREB1;STAT1;MYC;STAT3;E2F1;EP300;TP53;NFKB1
Longevity regulating pathway	8.112276193385458E-11	1.811741683189419E-9	24.192721055202735	562.1192655044885	HDAC2;CREB1;HDAC1;EHMT2;PPARG;FOXO3;TP53;FOXO1;NFKB1;FOXA2
Chronic myeloid leukemia	1.333619146301585E-10	2.552928080063034E-9	29.602985074626865	673.1113283048404	STAT5B;HDAC2;CTBP2;HDAC1;MYC;E2F1;TP53;NFKB1;RUNX1
Prostate cancer	1.2285048647871612E-9	2.0577456485184948E-8	22.514772727272728	461.94612814933464	CREBBP;CREB1;ZEB1;E2F1;EP300;ERG;TP53;FOXO1;NFKB1
Cell cycle	1.093100203490338E-8	1.6275047474189477E-7	17.20521739130435	315.40024467579127	CREBBP;HDAC2;HDAC1;MYC;RAD21;E2F1;EP300;SMC1A;TP53
Kaposi sarcoma-associated herpesvirus infection	2.8913159064357305E-8	3.874363314623879E-7	12.592568947906027	218.59401417982033	JUN;CREBBP;CREB1;STAT1;MYC;STAT3;E2F1;EP300;TP53;NFKB1
Acute myeloid leukemia	3.6018600797032544E-8	4.387720460729419E-7	25.58843036109064	438.5660020776572	CEBPA;STAT5B;SPI1;MYC;STAT3;NFKB1;RUNX1
Huntington disease	4.10330490575032E-8	4.582023811421191E-7	12.106588076379936	205.91960089992304	CREBBP;HDAC2;CREB1;POLR2A;SP1;HDAC1;EP300;PPARG;NRF1;TP53
Epstein-Barr virus infection	6.019664906952975E-8	6.204885365628452E-7	11.594799694099652	192.77107167257267	JUN;HDAC2;HDAC1;STAT1;MYC;STAT3;E2F1;TP53;NFKB1;NFKB2
Thyroid hormone signaling pathway	1.1072155100258091E-7	1.0597634167389887E-6	16.111518111518112	258.0460590460934	CREBBP;HDAC2;HDAC1;STAT1;MYC;EP300;TP53;FOXO1
MicroRNAs in cancer	2.722484218366152E-7	2.432085901740429E-6	8.512586805555555	128.68095149759012	CREBBP;ZEB1;HDAC1;MYC;STAT3;E2F1;EP300;TP53;SOX4;NFKB1;FOXP1
Human papillomavirus infection	7.231554319985782E-7	6.056426742988092E-6	7.673197492163009	108.49626289394806	CREBBP;HDAC2;CREB1;HDAC1;STAT1;IRF1;E2F1;EP300;TP53;FOXO1;NFKB1
Inflammatory bowel disease (IBD)	8.233680217148917E-7	6.490077347635029E-6	21.69710224166211	303.9734204697009	JUN;MAF;STAT1;TBX21;STAT3;NFKB1
Th17 cell differentiation	1.022479084129539E-6	7.611788737408791E-6	15.065978260869565	207.80926272566435	STAT5B;JUN;STAT1;TBX21;STAT3;NFKB1;RUNX1
Prolactin signaling pathway	1.2812252212444334E-6	9.03600945509232E-6	19.996975806451612	271.31284334340876	STAT5B;STAT1;IRF1;STAT3;FOXO3;NFKB1
Osteoclast differentiation	3.2328854531120896E-6	2.1660332535851E-5	12.54230072463768	158.5614651218835	JUN;SPI1;CREB1;STAT1;PPARG;NFKB1;NFKB2
Notch signaling pathway	3.881933292223808E-6	2.4770431483713825E-5	24.564571994062344	306.05435672209063	HDAC2;CREBBP;CTBP2;HDAC1;EP300
Th1 and Th2 cell differentiation	6.383542023384172E-6	3.8881574142430866E-5	14.86496624156039	177.81156646323925	STAT5B;JUN;MAF;STAT1;TBX21;NFKB1
Breast cancer	8.498578162985517E-6	4.9513455384350405E-5	10.739673913043479	125.39226221506775	JUN;SP1;MYC;E2F1;PGR;TP53;NFKB2
AGE-RAGE signaling pathway in diabetic complications	1.0337185772586944E-5	5.7715953896943766E-5	13.594371997254633	156.0601672338797	STAT5B;JUN;STAT1;STAT3;FOXO1;NFKB1
Hepatitis C	1.201645599740863E-5	6.440820414611026E-5	10.155038190364277	115.04879900707297	STAT1;MYC;STAT3;E2F1;NR1H3;TP53;NFKB1
C-type lectin receptor signaling pathway	1.29506583786781E-5	6.674570087472559E-5	13.036866359447005	146.7216385297926	EGR2;JUN;STAT1;IRF1;NFKB1;NFKB2
Cellular senescence	1.4772607326662133E-5	7.331590302861948E-5	9.820687695368003	109.23291606778758	MYC;E2F1;FOXO3;ETS1;TP53;FOXO1;NFKB1
Insulin resistance	1.607419115291289E-5	7.692648623179741E-5	12.523086654016446	138.23353238894336	CREB1;NR1H2;STAT3;NR1H3;FOXO1;NFKB1
Mitophagy	1.7521644655622507E-5	8.096208220184193E-5	17.5895390070922	192.6419258630073	JUN;SP1;E2F1;FOXO3;TP53
Non-small cell lung cancer	1.888391391591163E-5	8.434814882440529E-5	17.300313916986397	188.17897650771707	STAT5B;STAT3;E2F1;FOXO3;TP53
Renal cell carcinoma	2.347050705079293E-5	1.0145315950987912E-4	16.48686835106383	175.7461577739488	JUN;CREBBP;EP300;ARNT;ETS1
Pancreatic cancer	3.520968634339151E-5	1.4744056156295197E-4	15.069148936170214	154.52190627874575	STAT1;STAT3;E2F1;TP53;NFKB1
Measles	6.406356779860566E-5	2.601369116670654E-4	9.662267839687194	93.29532883353508	STAT5B;JUN;STAT1;STAT3;TP53;NFKB1
Small cell lung cancer	9.883188015420392E-5	3.895138806077449E-4	11.975942940038685	110.44322759951739	MAX;MYC;E2F1;TP53;NFKB1
Cushing syndrome	1.2171205129821962E-4	4.659832821131837E-4	8.552500541242694	77.09097871195597	NR4A1;CREB1;SP1;WDR5;E2F1;ARNT
Human cytomegalovirus infection	1.2864839176349914E-4	4.7885790267524685E-4	6.869814519345832	61.542735448649154	CREB1;SP1;MYC;STAT3;E2F1;TP53;NFKB1
Wnt signaling pathway	1.3518683433193154E-4	4.895955621751033E-4	8.382427843803056	74.67781558515375	JUN;CREBBP;CTBP2;MYC;EP300;TP53
HIF-1 signaling pathway	1.3931753527179623E-4	4.912776243794919E-4	11.089585666293393	98.46171200623027	CREBBP;STAT3;EP300;ARNT;NFKB1
JAK-STAT signaling pathway	1.5496497964693587E-4	5.324437762228053E-4	8.16583953680728	71.63328729470015	STAT5B;CREBBP;STAT1;MYC;STAT3;EP300
FoxO signaling pathway	5.053587435124108E-4	0.0016929517907665764	8.281956776679511	62.86205614947841	CREBBP;STAT3;EP300;FOXO3;FOXO1
Signaling pathways regulating pluripotency of stem cells	6.392719106015857E-4	0.002089327707819817	7.846538583677358	57.71270890843236	MYC;STAT3;PCGF1;TCF3;KLF4
MAPK signaling pathway	6.620178100664355E-4	0.0021121520606881515	5.181574577294686	37.930256001852264	NR4A1;JUN;MAX;MYC;TP53;NFKB1;NFKB2
Thyroid cancer	8.08976037464977E-4	0.0025209950934955098	18.26011029411765	130.00726069671498	MYC;PPARG;TP53
TGF-beta signaling pathway	0.0010419308007194646	0.003173152893100188	9.701346389228886	66.61603877841954	CREBBP;SP1;MYC;EP300
Bladder cancer	0.001094088160268779	0.0032579514105781416	16.33470394736842	111.36729983754054	MYC;E2F1;TP53
Influenza A	0.0016130379868875252	0.004698849787889747	6.32369905152525	40.65908263003814	JUN;CREBBP;STAT1;EP300;NFKB1
Glucagon signaling pathway	0.0017167716298229672	0.004894625497793141	8.421903242955874	53.62486630614482	CREBBP;CREB1;EP300;FOXO1
Cocaine addiction	0.00183761907410643	0.005130019915213784	13.488451086956522	84.9675912217824	JUN;CREB1;NFKB1
Tuberculosis	0.0019707439196817683	0.005389381331374631	6.030508681829298	37.56611417955603	CREBBP;CREB1;STAT1;EP300;NFKB1
TNF signaling pathway	0.0021834997412944653	0.005851779306669167	7.862959285004965	48.17498577088078	JUN;CREB1;IRF1;NFKB1
Chemokine signaling pathway	0.0025531589912836886	0.006708300094745378	5.66877515813686	33.84499049742434	STAT5B;STAT1;STAT3;FOXO3;NFKB1
Neurotrophin signaling pathway	0.002903507631747955	0.0074255339857540875	7.244302059496568	42.32002271650338	JUN;FOXO3;TP53;NFKB1
Endometrial cancer	0.0029802985137140693	0.0074255339857540875	11.276136363636363	65.57898495623913	MYC;FOXO3;TP53
AMPK signaling pathway	0.0029923793673934385	0.0074255339857540875	7.181488203266787	41.73655755962239	CREB1;PPARG;FOXO3;FOXO1
cAMP signaling pathway	0.004078381307133846	0.009846616757151748	5.060643437146675	27.843939071779346	JUN;CREBBP;CREB1;EP300;NFKB1
Cortisol synthesis and secretion	0.0041150040179141634	0.009846616757151748	9.999495967741936	54.928385977074	NR4A1;CREB1;SP1
Amphetamine addiction	0.004671179559045147	0.010981369489685084	9.536538461538461	51.176342682414884	JUN;CREB1;HDAC1
Estrogen signaling pathway	0.004800102483209151	0.011089891943965969	6.258171745152355	33.41311747814395	JUN;CREB1;SP1;PGR
Fluid shear stress and atherosclerosis	0.005051904199144886	0.011473816316701945	6.164834307992202	32.59958240430221	JUN;SUMO2;TP53;NFKB1
Apoptosis	0.0055818042511373	0.012466029494206637	5.986217341915941	31.057951491877848	JUN;TP53;NFKB1;LMNB1
Leishmaniasis	0.005914528961844121	0.012992571817821513	8.727992957746478	44.77760123392785	JUN;STAT1;NFKB1
Pertussis	0.006368743665969669	0.013707064579487945	8.488013698630137	42.918394000552254	JUN;IRF1;NFKB1
Non-alcoholic fatty liver disease (NAFLD)	0.0064443661828935865	0.013707064579487945	5.736769509981851	28.939414836750064	CEBPA;JUN;NR1H3;NFKB1
Maturity onset diabetes of the young	0.007296015367885443	0.015276032176510147	17.076460481099655	84.02347584727124	NEUROD1;FOXA2
PI3K-Akt signaling pathway	0.008327210936568458	0.017166865623079588	3.624953652206155	17.357099865238755	NR4A1;CREB1;MYC;FOXO3;TP53;NFKB1
ErbB signaling pathway	0.008666702863437143	0.017596033086372382	7.5529725609756095	35.863529253556464	STAT5B;JUN;MYC
Colorectal cancer	0.008948184258077856	0.01789636851615571	7.461596385542169	35.19116168083113	JUN;MYC;TP53
Hepatocellular carcinoma	0.009747406860134172	0.019208125283205577	5.067265725288832	23.465260987983566	SMARCB1;MYC;E2F1;TP53
Aldosterone synthesis and secretion	0.012745655260533006	0.024752431955238012	6.5151315789473685	28.422683884777385	ATF1;NR4A1;CREB1
Melanogenesis	0.013818034083539196	0.026451665245632177	6.314732142857143	27.03829835586359	CREBBP;CREB1;EP300
Toll-like receptor signaling pathway	0.014940328785723458	0.028197240243478073	6.126237623762377	25.752810529199575	JUN;STAT1;NFKB1
Toxoplasmosis	0.018609175231992483	0.0346337427928749	5.6224431818181815	22.40037884848225	STAT1;STAT3;NFKB1
Basal transcription factors	0.0209142959495074	0.03839062544156153	9.52193718532726	36.824400369482454	GTF2B;TAF1
Relaxin signaling pathway	0.02678535847036899	0.048503216689587084	4.865649606299213	17.613164360220427	JUN;CREB1;NFKB1

## Sheet: Reactome_2016_Human
Term	P-value	Adjusted P-value	Odds Ratio	Combined Score	Genes
Generic Transcription Pathway Homo sapiens R-HSA-212436	1.1931680654793526E-13	4.808467303881791E-11	8.205123802328377	244.15982139111432	YAP1;HDAC2;HDAC1;EHMT2;TRIM28;POLR2A;MYC;E2F1;EP300;TEAD4;ZNF18;JUN;ZNF263;CREBBP;NR1H2;NR1H3;SUPT5H;CDK9;SKI;NR4A1;SP1;PGR;PPARG;TP53;TAF1
Transcriptional regulation of white adipocyte differentiation Homo sapiens R-HSA-381340	6.023296074558013E-12	1.2136941590234396E-9	32.29441459045758	834.3386822755762	CEBPA;CREBBP;EGR2;KLF5;EBF1;EP300;PPARG;NR2F2;KLF4;NFKB1
Developmental Biology Homo sapiens R-HSA-1266738	2.919520235073363E-11	3.9218888491152175E-9	7.156694091249065	173.60004825433109	CEBPA;EGR2;JUN;CREBBP;TCF12;STAT3;EBF1;NR2F2;CTCF;FOXO3;KLF4;FOXO1;NFKB1;NEUROD1;CREB1;KLF5;POLR2A;WDR5;EP300;PPARG;TCF3;FOXA2
Diseases of signal transduction Homo sapiens R-HSA-5663202	1.5282357244087234E-10	1.539697492341789E-8	11.798110777157579	266.6577966603001	STAT5B;CREBBP;HDAC2;CTBP2;HDAC1;STAT1;STAT3;FOXO3;FOXO1;NR4A1;CREB1;POLR2A;MYC;EP300
Disease Homo sapiens R-HSA-1643685	3.440081993195203E-10	2.7727060865153334E-8	6.8932579226142385	150.20654153901785	STAT5B;CREBBP;HDAC2;CTBP2;HDAC1;STAT1;GTF2B;STAT3;FOXO3;SUPT5H;FOXO1;NFKB1;NFKB2;CDK9;NR4A1;CREB1;POLR2A;MYC;EP300;TAF1
Signaling by NOTCH Homo sapiens R-HSA-157118	9.472450273761674E-9	6.362329100543258E-7	17.51150442477876	323.5229117420718	JUN;CREBBP;HDAC2;CREB1;HDAC1;MYC;E2F1;EP300;TP53
Gene Expression Homo sapiens R-HSA-74160	1.4277816981419404E-8	8.219943205017171E-7	4.277665211970075	77.27413459508247	YAP1;HDAC2;HDAC1;GTF2B;EHMT2;TRIM28;POLR2A;MYC;E2F1;EP300;TEAD4;ZNF18;JUN;ZNF263;CREBBP;NR1H2;TET2;NR1H3;SUPT5H;CDK9;SKI;NR4A1;SP1;PGR;PPARG;TP53;TAF1
Factors involved in megakaryocyte development and platelet production Homo sapiens R-HSA-983231	3.3631679615229755E-8	1.6941958606171988E-6	14.976515151515152	257.7128380133287	NFE2;CREBBP;HDAC2;HDAC1;IRF1;JMJD1C;EP300;TP53;GATA1
AKT phosphorylates targets in the nucleus Homo sapiens R-HSA-198693	6.98170689427558E-8	3.1262531982145097E-6	167.54526315789474	2760.7081940717703	NR4A1;CREB1;FOXO3;FOXO1
Cellular Senescence Homo sapiens R-HSA-2559583	1.0574460396740288E-7	4.261507539886335E-6	12.992763157894737	208.69286771841604	JUN;SP1;EHMT2;STAT3;E2F1;ETS1;TP53;NFKB1;LMNB1
Transcriptional Regulation by TP53 Homo sapiens R-HSA-3700989	1.5170907185658366E-7	5.558068723473019E-6	8.031609195402298	126.10671470482758	CDK9;JUN;CREBBP;HDAC2;POLR2A;HDAC1;EHMT2;E2F1;EP300;SUPT5H;TP53;TAF1
Chromatin organization Homo sapiens R-HSA-4839726	1.8016545742915233E-7	5.585129180303722E-6	10.239804411152726	159.0179182758446	KDM5B;CREBBP;HDAC2;SMARCB1;KDM4C;KDM2B;HDAC1;EHMT2;WDR5;EP300
Chromatin modifying enzymes Homo sapiens R-HSA-3247509	1.8016545742915233E-7	5.585129180303722E-6	10.239804411152726	159.0179182758446	KDM5B;CREBBP;HDAC2;SMARCB1;KDM4C;KDM2B;HDAC1;EHMT2;WDR5;EP300
Cellular responses to stress Homo sapiens R-HSA-2262752	2.685146754492858E-7	7.316494918007821E-6	7.594366197183098	114.9054965653702	JUN;CREBBP;SP1;EHMT2;STAT3;E2F1;EP300;ARNT;ETS1;TP53;NFKB1;LMNB1
Activation of anterior HOX genes in hindbrain development during early embryogenesis Homo sapiens R-HSA-5617472	2.904811878117249E-7	7.316494918007821E-6	18.389846235418876	276.79894548843754	JUN;CREBBP;EGR2;POLR2A;WDR5;EP300;CTCF
Activation of HOX genes during differentiation Homo sapiens R-HSA-5619507	2.904811878117249E-7	7.316494918007821E-6	18.389846235418876	276.79894548843754	JUN;CREBBP;EGR2;POLR2A;WDR5;EP300;CTCF
PPARA activates gene expression Homo sapiens R-HSA-1989781	1.4782333711635063E-6	3.504282638699371E-5	14.208880229696472	190.74942657832304	TEAD4;YAP1;CREBBP;SP1;EP300;PPARG;NRF1
Pre-NOTCH Transcription and Translation Homo sapiens R-HSA-1912408	1.7461252875250861E-6	3.740058332330627E-5	29.351359338061467	389.14359026734536	CREBBP;JUN;E2F1;EP300;TP53
Regulation of lipid metabolism by Peroxisome proliferator-activated receptor alpha (PPARalpha) Homo sapiens R-HSA-400206	1.7633029358382612E-6	3.740058332330627E-5	13.815715995213402	183.03505194862444	TEAD4;YAP1;CREBBP;SP1;EP300;PPARG;NRF1
Transcriptional activity of SMAD2/SMAD3:SMAD4 heterotrimer Homo sapiens R-HSA-2173793	2.500904538634497E-6	5.039322645348511E-5	27.089470812875067	349.4232393712718	CDK9;SKI;HDAC1;SP1;MYC
NOTCH1 Intracellular Domain Regulates Transcription Homo sapiens R-HSA-2122947	3.4911969302703977E-6	6.699773156661762E-5	25.150709219858157	316.02534943881153	HDAC2;CREBBP;HDAC1;MYC;EP300
Regulation of TP53 Activity through Acetylation Homo sapiens R-HSA-6804758	4.6524614549927125E-6	8.522463483463923E-5	44.05983379501385	540.9716680276026	HDAC2;HDAC1;EP300;TP53
Nuclear Receptor transcription pathway Homo sapiens R-HSA-383280	5.263380771613801E-6	9.222358482436355E-5	22.959065679925995	279.06140522995395	NR4A1;NR1H2;NR1H3;PPARG;PGR
Constitutive Signaling by AKT1 E17K in Cancer Homo sapiens R-HSA-5674400	6.596089736331308E-6	1.1075934015589655E-4	39.85964912280702	475.4870916253907	NR4A1;CREB1;FOXO3;FOXO1
Constitutive Signaling by NOTCH1 HD+PEST Domain Mutants Homo sapiens R-HSA-2894862	9.16420245139553E-6	1.231057862637466E-4	20.303805237315874	235.5283172777524	HDAC2;CREBBP;HDAC1;MYC;EP300
Signaling by NOTCH1 in Cancer Homo sapiens R-HSA-2644603	9.16420245139553E-6	1.231057862637466E-4	20.303805237315874	235.5283172777524	HDAC2;CREBBP;HDAC1;MYC;EP300
Signaling by NOTCH1 PEST Domain Mutants in Cancer Homo sapiens R-HSA-2644602	9.16420245139553E-6	1.231057862637466E-4	20.303805237315874	235.5283172777524	HDAC2;CREBBP;HDAC1;MYC;EP300
Constitutive Signaling by NOTCH1 PEST Domain Mutants Homo sapiens R-HSA-2644606	9.16420245139553E-6	1.231057862637466E-4	20.303805237315874	235.5283172777524	HDAC2;CREBBP;HDAC1;MYC;EP300
Signaling by NOTCH1 HD+PEST Domain Mutants in Cancer Homo sapiens R-HSA-2894858	9.16420245139553E-6	1.231057862637466E-4	20.303805237315874	235.5283172777524	HDAC2;CREBBP;HDAC1;MYC;EP300
Pre-NOTCH Expression and Processing Homo sapiens R-HSA-1912422	9.16420245139553E-6	1.231057862637466E-4	20.303805237315874	235.5283172777524	JUN;CREBBP;E2F1;EP300;TP53
TP53 Regulates Transcription of DNA Repair Genes Homo sapiens R-HSA-6796648	1.281871389818494E-5	1.6664328067640422E-4	18.84973404255319	212.33479762755894	CDK9;JUN;POLR2A;SUPT5H;TP53
Regulation of gene expression by Hypoxia-inducible Factor Homo sapiens R-HSA-1234158	1.3765887521568278E-5	1.733641459747505E-4	88.8125	994.1064611567896	CREBBP;EP300;ARNT
RNA Polymerase II Pre-transcription Events Homo sapiens R-HSA-674695	1.6237151441433108E-5	1.9829006154234978E-4	17.88856833754057	197.2788639414522	CDK9;POLR2A;GTF2B;SUPT5H;TAF1
Oncogene Induced Senescence Homo sapiens R-HSA-2559585	1.8259003214366218E-5	2.1023937986827388E-4	29.88421052631579	326.0622063408957	SP1;E2F1;ETS1;TP53
SMAD2/SMAD3:SMAD4 heterotrimer regulates transcription Homo sapiens R-HSA-2173796	1.8259003214366218E-5	2.1023937986827388E-4	29.88421052631579	326.0622063408957	CDK9;HDAC1;SP1;MYC
Transcription of the HIV genome Homo sapiens R-HSA-167172	2.0327234198260984E-5	2.275520939416438E-4	17.020418668496912	183.88092682891724	CDK9;POLR2A;GTF2B;SUPT5H;TAF1
Signaling by NOTCH1 Homo sapiens R-HSA-1980143	2.887953828081586E-5	3.0627510334654714E-4	15.746268656716419	164.5859399897073	HDAC2;CREBBP;HDAC1;MYC;EP300
TRAF6 Mediated Induction of proinflammatory cytokines Homo sapiens R-HSA-168180	2.887953828081586E-5	3.0627510334654714E-4	15.746268656716419	164.5859399897073	ATF1;JUN;CREB1;NFKB1;NFKB2
Signaling by TGF-beta Receptor Complex Homo sapiens R-HSA-170834	3.088219096308855E-5	3.1911597328524837E-4	15.51392365456821	161.1172304687459	CDK9;SKI;HDAC1;SP1;MYC
Transcriptional activation of mitochondrial biogenesis Homo sapiens R-HSA-2151201	4.5017312340260724E-5	4.4491992226969676E-4	23.23391812865497	232.5358197753936	CREBBP;CREB1;NRF1;GABPA
RIG-I/MDA5 mediated induction of IFN-alpha/beta pathways Homo sapiens R-HSA-168928	4.5264805987735895E-5	4.4491992226969676E-4	14.251725129384704	142.55973194094878	CREBBP;IRF1;EP300;NFKB1;NFKB2
Toll Like Receptor 10 (TLR10) Cascade Homo sapiens R-HSA-168142	5.416250266133722E-5	4.960792857390658E-4	13.69439071566731	134.5271446616549	ATF1;JUN;CREB1;NFKB1;NFKB2
Toll Like Receptor 5 (TLR5) Cascade Homo sapiens R-HSA-168176	5.416250266133722E-5	4.960792857390658E-4	13.69439071566731	134.5271446616549	ATF1;JUN;CREB1;NFKB1;NFKB2
MyD88 cascade initiated on plasma membrane Homo sapiens R-HSA-975871	5.416250266133722E-5	4.960792857390658E-4	13.69439071566731	134.5271446616549	ATF1;JUN;CREB1;NFKB1;NFKB2
TRAF6 mediated induction of NFkB and MAP kinases upon TLR7/8 or 9 activation Homo sapiens R-HSA-975138	5.740998034119149E-5	5.141382683888927E-4	13.518139661756683	132.00858644989904	ATF1;JUN;CREB1;NFKB1;NFKB2
MyD88 dependent cascade initiated on endosome Homo sapiens R-HSA-975155	6.435455479833847E-5	5.518060762495831E-4	13.178856382978724	127.19049832884586	ATF1;JUN;CREB1;NFKB1;NFKB2
Toll Like Receptor 7/8 (TLR7/8) Cascade Homo sapiens R-HSA-168181	6.435455479833847E-5	5.518060762495831E-4	13.178856382978724	127.19049832884586	ATF1;JUN;CREB1;NFKB1;NFKB2
Toll Like Receptor 9 (TLR9) Cascade Homo sapiens R-HSA-168138	7.596609740954157E-5	6.377986928342761E-4	12.700589592412202	120.4679296455409	ATF1;JUN;CREB1;NFKB1;NFKB2
Signaling by cytosolic FGFR1 fusion mutants Homo sapiens R-HSA-1839117	9.095268199124112E-5	7.138705483029381E-4	41.42916666666667	385.50548704840793	STAT5B;STAT1;STAT3
MyD88:Mal cascade initiated on plasma membrane Homo sapiens R-HSA-166058	9.38837197519993E-5	7.138705483029381E-4	12.114208853020298	112.34055327949397	ATF1;JUN;CREB1;NFKB1;NFKB2
Toll Like Receptor TLR1:TLR2 Cascade Homo sapiens R-HSA-168179	9.38837197519993E-5	7.138705483029381E-4	12.114208853020298	112.34055327949397	ATF1;JUN;CREB1;NFKB1;NFKB2
Toll Like Receptor TLR6:TLR2 Cascade Homo sapiens R-HSA-168188	9.38837197519993E-5	7.138705483029381E-4	12.114208853020298	112.34055327949397	ATF1;JUN;CREB1;NFKB1;NFKB2
Toll Like Receptor 2 (TLR2) Cascade Homo sapiens R-HSA-181438	9.38837197519993E-5	7.138705483029381E-4	12.114208853020298	112.34055327949397	ATF1;JUN;CREB1;NFKB1;NFKB2
Mitochondrial biogenesis Homo sapiens R-HSA-1592230	1.0086802574407317E-4	7.527743402752127E-4	18.578713450292398	170.9557024347254	CREBBP;CREB1;NRF1;GABPA
Fatty acid, triacylglycerol, and ketone body metabolism Homo sapiens R-HSA-535734	1.027445672750535E-4	7.528374656699374E-4	7.134420289855073	65.51726914110355	TEAD4;YAP1;CREBBP;SP1;EP300;PPARG;NRF1
Regulation of TP53 Activity Homo sapiens R-HSA-5633007	1.0542829852697421E-4	7.587072197566179E-4	8.790211345939934	80.49617994549301	HDAC2;HDAC1;EHMT2;EP300;TP53;TAF1
Regulation of TP53 Activity through Methylation Homo sapiens R-HSA-6804760	1.0761876633780606E-4	7.608835584936113E-4	38.837890625	354.85852550299643	EHMT2;EP300;TP53
MyD88-independent TLR3/TLR4 cascade Homo sapiens R-HSA-166166	1.2065825644220521E-4	8.05858068822268E-4	11.452937095282147	103.33467852251358	ATF1;JUN;CREB1;NFKB1;NFKB2
Toll Like Receptor 3 (TLR3) Cascade Homo sapiens R-HSA-168164	1.2065825644220521E-4	8.05858068822268E-4	11.452937095282147	103.33467852251358	ATF1;JUN;CREB1;NFKB1;NFKB2
TRIF-mediated TLR3/TLR4 signaling Homo sapiens R-HSA-937061	1.2065825644220521E-4	8.05858068822268E-4	11.452937095282147	103.33467852251358	ATF1;JUN;CREB1;NFKB1;NFKB2
Signal Transduction Homo sapiens R-HSA-162582	1.2197851662074033E-4	8.05858068822268E-4	2.549955910518009	22.979350016456042	ATF1;YAP1;HDAC2;CTBP2;HDAC1;FOXO3;FOXO1;POLR2A;MYC;E2F1;EP300;SOX4;STAT5B;JUN;CREBBP;KDM4C;STAT1;STAT3;NFKB1;CDK9;SKI;NR4A1;CREB1;SP1;PGR;TP53
Regulation of gene expression in beta cells Homo sapiens R-HSA-210745	1.261560956566538E-4	8.200146217682497E-4	36.5514705882353	328.1587580174437	NEUROD1;FOXO1;FOXA2
CD209 (DC-SIGN) signaling Homo sapiens R-HSA-5621575	1.4665418694653583E-4	9.381212276103801E-4	34.51909722222222	304.7150252794808	CREBBP;EP300;NFKB1
Formation of the beta-catenin:TCF transactivating complex Homo sapiens R-HSA-201722	1.9521846264047165E-4	0.00122926625693922	15.475243664717349	132.18011168457892	CREBBP;HDAC1;MYC;EP300
Growth hormone receptor signaling Homo sapiens R-HSA-982772	2.2078693750356187E-4	0.0013597196766906548	29.583333333333332	249.04174198623193	STAT5B;STAT1;STAT3
MAP kinase activation in TLR cascade Homo sapiens R-HSA-450294	2.2268361950765066E-4	0.0013597196766906548	14.921052631578947	125.48244980138006	ATF1;JUN;CREB1;NFKB1
Activated TLR4 signalling Homo sapiens R-HSA-166054	2.3691095778597242E-4	0.0014235943671599592	9.839928415191887	82.14201216127458	ATF1;JUN;CREB1;NFKB1;NFKB2
LRR FLII-interacting protein 1 (LRRFIP1) activates type I IFN production Homo sapiens R-HSA-3134973	2.402094713818293E-4	0.0014235943671599592	136.75601374570448	1139.724511594925	CREBBP;EP300
HDMs demethylate histones Homo sapiens R-HSA-3214842	2.4999499059859726E-4	0.0014601156697280392	28.23721590909091	234.20143626014345	KDM5B;KDM4C;KDM2B
Epigenetic regulation of gene expression Homo sapiens R-HSA-212165	2.6788681435536326E-4	0.0015265673427563976	9.570116054158607	78.713687770257	HDAC2;HDAC1;EHMT2;TET2;EP300
Signaling by FGFR in disease Homo sapiens R-HSA-1226099	2.68948588922343E-4	0.0015265673427563976	14.16021409455843	116.41098294209345	STAT5B;POLR2A;STAT1;STAT3
Regulation of Hypoxia-inducible Factor (HIF) by oxygen Homo sapiens R-HSA-1234174	2.8159031963469633E-4	0.0015545328604490772	27.008152173913043	220.79319187429456	CREBBP;EP300;ARNT
Cellular response to hypoxia Homo sapiens R-HSA-2262749	2.8159031963469633E-4	0.0015545328604490772	27.008152173913043	220.79319187429456	CREBBP;EP300;ARNT
Cytosolic sensors of pathogen-associated DNA Homo sapiens R-HSA-1834949	3.2174321130545993E-4	0.0017521961372445993	13.473005093378609	108.34663047423913	CREBBP;EP300;NFKB1;NFKB2
Toll Like Receptor 4 (TLR4) Cascade Homo sapiens R-HSA-166016	3.5209088634258955E-4	0.0018919016959475143	8.994362611383888	71.51976456379214	ATF1;JUN;CREB1;NFKB1;NFKB2
p75NTR negatively regulates cell cycle via SC1 Homo sapiens R-HSA-193670	3.5915145937275825E-4	0.0019044478700950206	102.5618556701031	813.4966772432183	HDAC2;HDAC1
RNA Polymerase II Transcription Homo sapiens R-HSA-73857	3.7946691406844405E-4	0.0019860411216828956	8.842302878598248	69.64854861051899	CDK9;POLR2A;GTF2B;SUPT5H;TAF1
YAP1- and WWTR1 (TAZ)-stimulated gene expression Homo sapiens R-HSA-2032785	3.9150511834186696E-4	0.0020134894055471287	23.888221153846153	187.41532497939394	YAP1;TEAD4;CREBBP
Signalling by NGF Homo sapiens R-HSA-166520	3.9470387850675724E-4	0.0020134894055471287	4.412698412698413	34.58397111408847	ATF1;NR4A1;HDAC2;CREB1;HDAC1;STAT3;FOXO3;FOXO1;NFKB1
MAPK targets/ Nuclear events mediated by MAP kinases Homo sapiens R-HSA-450282	4.334480544214506E-4	0.002183494574148057	23.002314814814813	178.12391305752828	ATF1;JUN;CREB1
Late Phase of HIV Life Cycle Homo sapiens R-HSA-162599	4.3901655854496616E-4	0.002184242877699029	8.553018508908494	66.1231588114643	CDK9;POLR2A;GTF2B;SUPT5H;TAF1
Positive epigenetic regulation of rRNA expression Homo sapiens R-HSA-5250913	4.7321703839325316E-4	0.002240731132524815	12.10190694126621	92.65167213832586	HDAC2;HDAC1;EHMT2;EP300
Cell Cycle, Mitotic Homo sapiens R-HSA-69278	4.7744829363271444E-4	0.002240731132524815	4.293156732891832	32.8300043269878	MAX;HDAC1;MYC;RAD21;E2F1;EP300;SMC1A;TP53;LMNB1
Pausing and recovery of Tat-mediated HIV elongation Homo sapiens R-HSA-167238	4.781709116554196E-4	0.002240731132524815	22.1796875	169.57573972762742	CDK9;POLR2A;SUPT5H
Tat-mediated HIV elongation arrest and recovery Homo sapiens R-HSA-167243	4.781709116554196E-4	0.002240731132524815	22.1796875	169.57573972762742	CDK9;POLR2A;SUPT5H
FGFR1 mutant receptor activation Homo sapiens R-HSA-1839124	4.781709116554196E-4	0.002240731132524815	22.1796875	169.57573972762742	STAT5B;STAT1;STAT3
CREB phosphorylation Homo sapiens R-HSA-199920	5.01189726718219E-4	0.002254006014769055	82.04536082474227	623.4237936654181	ATF1;CREB1
Interleukin-1 processing Homo sapiens R-HSA-448706	5.01189726718219E-4	0.002254006014769055	82.04536082474227	623.4237936654181	NFKB1;NFKB2
IkBA variant leads to EDA-ID Homo sapiens R-HSA-5603029	5.01189726718219E-4	0.002254006014769055	82.04536082474227	623.4237936654181	NFKB1;NFKB2
Regulation of beta-cell development Homo sapiens R-HSA-186712	5.257483012116406E-4	0.002254006014769055	21.413793103448278	161.6888700758816	NEUROD1;FOXO1;FOXA2
HIV elongation arrest and recovery Homo sapiens R-HSA-167287	5.257483012116406E-4	0.002254006014769055	21.413793103448278	161.6888700758816	CDK9;POLR2A;SUPT5H
Pausing and recovery of HIV elongation Homo sapiens R-HSA-167290	5.257483012116406E-4	0.002254006014769055	21.413793103448278	161.6888700758816	CDK9;POLR2A;SUPT5H
Elongation arrest and recovery Homo sapiens R-HSA-112387	5.257483012116406E-4	0.002254006014769055	21.413793103448278	161.6888700758816	CDK9;POLR2A;SUPT5H
TRAF6 mediated IRF7 activation Homo sapiens R-HSA-933541	5.257483012116406E-4	0.002254006014769055	21.413793103448278	161.6888700758816	CREBBP;IRF1;EP300
Senescence-Associated Secretory Phenotype (SASP) Homo sapiens R-HSA-2559582	5.795472388407698E-4	0.002432891013050315	11.436481614996396	85.23910963947347	JUN;EHMT2;STAT3;NFKB1
RNA polymerase II transcribes snRNA genes Homo sapiens R-HSA-6807505	5.795472388407698E-4	0.002432891013050315	11.436481614996396	85.23910963947347	CDK9;POLR2A;SP1;GTF2B
Toll-Like Receptors Cascades Homo sapiens R-HSA-168898	6.603784418167005E-4	0.0027114872542036584	7.7880220646178095	57.029329629165524	ATF1;JUN;CREB1;NFKB1;NFKB2
Activation of PUMA and translocation to mitochondria Homo sapiens R-HSA-139915	6.660973651765811E-4	0.0027114872542036584	68.36769759450172	500.0464475569458	E2F1;TP53
IKBKG deficiency causes anhidrotic ectodermal dysplasia with immunodeficiency (EDA-ID) (via TLR) Homo sapiens R-HSA-5603027	6.660973651765811E-4	0.0027114872542036584	68.36769759450172	500.0464475569458	NFKB1;NFKB2
HIV Life Cycle Homo sapiens R-HSA-162587	6.820029193416502E-4	0.002748471764946851	7.730366082603254	56.35805318593881	CDK9;POLR2A;GTF2B;SUPT5H;TAF1
Cohesin Loading onto Chromatin Homo sapiens R-HSA-2470946	8.536491010186947E-4	0.0034061444327775636	58.597938144329895	414.0524647164975	RAD21;SMC1A
Signaling by FGFR1 in disease Homo sapiens R-HSA-5655302	8.751769051099342E-4	0.003439482040061177	17.7375	124.89123658079023	STAT5B;STAT1;STAT3
PI3K/AKT Signaling in Cancer Homo sapiens R-HSA-2219528	8.79073573514395E-4	0.003439482040061177	10.176636713735558	71.60934893597509	NR4A1;CREB1;FOXO3;FOXO1
Nuclear signaling by ERBB4 Homo sapiens R-HSA-1251985	9.447195722076117E-4	0.0036607883423044954	17.24392361111111	120.09741705099447	YAP1;STAT5B;PGR
Establishment of Sister Chromatid Cohesion Homo sapiens R-HSA-2468052	0.0010636212860347096	0.004082279793066553	51.27061855670103	351.0025453408367	RAD21;SMC1A
MAPK6/MAPK4 signaling Homo sapiens R-HSA-5687128	0.0011308225144808495	0.004299259182413041	9.479904306220096	64.31934974557537	JUN;MYC;FOXO3;FOXO1
Signaling by SCF-KIT Homo sapiens R-HSA-1433557	0.0011643742861535515	0.004335588471187898	4.685568772217665	31.653694529400276	STAT5B;NR4A1;CREB1;STAT1;STAT3;FOXO3;FOXO1
BMAL1:CLOCK,NPAS2 activates circadian gene expression Homo sapiens R-HSA-1368108	0.0011740400797504561	0.004335588471187898	15.915064102564102	107.38378234277715	CREBBP;CREB1;EP300
Transcriptional regulation of pluripotent stem cells Homo sapiens R-HSA-452723	0.0011740400797504561	0.004335588471187898	15.915064102564102	107.38378234277715	POLR2A;STAT3;KLF4
ERCC6 (CSB) and EHMT2 (G9a) positively regulate rRNA expression Homo sapiens R-HSA-427389	0.0012575858202976732	0.004335588471187898	15.51640625	103.62727202736153	HDAC2;HDAC1;EHMT2
HIV Transcription Elongation Homo sapiens R-HSA-167169	0.0012575858202976732	0.004335588471187898	15.51640625	103.62727202736153	CDK9;POLR2A;SUPT5H
Tat-mediated elongation of the HIV-1 transcript Homo sapiens R-HSA-167246	0.0012575858202976732	0.004335588471187898	15.51640625	103.62727202736153	CDK9;POLR2A;SUPT5H
Formation of HIV-1 elongation complex containing HIV-1 Tat Homo sapiens R-HSA-167200	0.0012575858202976732	0.004335588471187898	15.51640625	103.62727202736153	CDK9;POLR2A;SUPT5H
Signaling by ERBB4 Homo sapiens R-HSA-1236394	0.0012713354521853898	0.004335588471187898	4.611858931215507	30.750433657814284	YAP1;STAT5B;NR4A1;CREB1;PGR;FOXO3;FOXO1
Interleukin-6 signaling Homo sapiens R-HSA-1059683	0.0012957918894975805	0.004335588471187898	45.57159221076747	302.9888042778111	STAT1;STAT3
SUMO E3 ligases SUMOylate target proteins Homo sapiens R-HSA-3108232	0.0013243339101511955	0.004335588471187898	9.065903890160182	60.07834580555352	RAD21;SUMO2;SMC1A;TP53
Formation of HIV elongation complex in the absence of HIV Tat Homo sapiens R-HSA-167152	0.0013447855059515812	0.004335588471187898	15.137195121951219	100.07987970271886	CDK9;POLR2A;SUPT5H
RNA Polymerase II Transcription Elongation Homo sapiens R-HSA-75955	0.0013447855059515812	0.004335588471187898	15.137195121951219	100.07987970271886	CDK9;POLR2A;SUPT5H
Formation of RNA Pol II elongation complex Homo sapiens R-HSA-112382	0.0013447855059515812	0.004335588471187898	15.137195121951219	100.07987970271886	CDK9;POLR2A;SUPT5H
RNA Polymerase II HIV Promoter Escape Homo sapiens R-HSA-167162	0.0013447855059515812	0.004335588471187898	15.137195121951219	100.07987970271886	POLR2A;GTF2B;TAF1
RNA Polymerase II Promoter Escape Homo sapiens R-HSA-73776	0.0013447855059515812	0.004335588471187898	15.137195121951219	100.07987970271886	POLR2A;GTF2B;TAF1
RNA Polymerase II Transcription Initiation And Promoter Clearance Homo sapiens R-HSA-76042	0.0013447855059515812	0.004335588471187898	15.137195121951219	100.07987970271886	POLR2A;GTF2B;TAF1
RNA Polymerase II Transcription Initiation Homo sapiens R-HSA-75953	0.0013447855059515812	0.004335588471187898	15.137195121951219	100.07987970271886	POLR2A;GTF2B;TAF1
RNA Polymerase II Transcription Pre-Initiation And Promoter Opening Homo sapiens R-HSA-73779	0.0013447855059515812	0.004335588471187898	15.137195121951219	100.07987970271886	POLR2A;GTF2B;TAF1
HIV Transcription Initiation Homo sapiens R-HSA-167161	0.0013447855059515812	0.004335588471187898	15.137195121951219	100.07987970271886	POLR2A;GTF2B;TAF1
Downstream signal transduction Homo sapiens R-HSA-186763	0.0015337778632499792	0.004905654594363029	4.457465503775059	28.884471833523754	STAT5B;NR4A1;CREB1;STAT1;STAT3;FOXO3;FOXO1
NOTCH2 intracellular domain regulates transcription Homo sapiens R-HSA-2197563	0.0015499404872296638	0.0049183150893980674	41.01237113402062	265.33112403993107	CREB1;EP300
SUMOylation Homo sapiens R-HSA-2990846	0.0015973619541370153	0.005029194277478259	8.59641888225719	55.35579513053687	RAD21;SUMO2;SMC1A;TP53
RNA Polymerase I Transcription Initiation Homo sapiens R-HSA-73762	0.001628892609565844	0.005088711020581668	14.102982954545455	90.53910388239198	HDAC2;HDAC1;EHMT2
Hemostasis Homo sapiens R-HSA-109582	0.001666736994120515	0.005166884681773596	3.5650092081031306	22.80496269679495	NFE2;CREBBP;HDAC2;HDAC1;IRF1;JMJD1C;EP300;TP53;GATA1
TP53 Regulates Transcription of Cell Cycle Genes Homo sapiens R-HSA-6791312	0.0017312869110559788	0.0053260200393554155	13.78888888888889	87.68203135919813	E2F1;EP300;TP53
Mitotic Telophase/Cytokinesis Homo sapiens R-HSA-68884	0.0018258482536678334	0.005491170494239828	37.28209934395501	235.09012915025681	RAD21;SMC1A
TP53 Regulates Transcription of Genes Involved in G1 Cell Cycle Arrest Homo sapiens R-HSA-6804116	0.0018258482536678334	0.005491170494239828	37.28209934395501	235.09012915025681	E2F1;TP53
DEx/H-box helicases activate type I IFN and inflammatory cytokines production Homo sapiens R-HSA-3134963	0.0018258482536678334	0.005491170494239828	37.28209934395501	235.09012915025681	NFKB1;NFKB2
Cell Cycle Homo sapiens R-HSA-1640170	0.001976357051596898	0.005899791791063333	3.472890484739677	21.62395260966233	MAX;HDAC1;MYC;RAD21;E2F1;EP300;SMC1A;TP53;LMNB1
Repression of WNT target genes Homo sapiens R-HSA-4641265	0.0021232979505485697	0.006200645464283142	34.17353951890034	210.3307802944267	CTBP2;HDAC1
SUMOylation of transcription factors Homo sapiens R-HSA-3232118	0.0021232979505485697	0.006200645464283142	34.17353951890034	210.3307802944267	SUMO2;TP53
TRAF3-dependent IRF activation pathway Homo sapiens R-HSA-918233	0.0021232979505485697	0.006200645464283142	34.17353951890034	210.3307802944267	CREBBP;EP300
Innate Immune System Homo sapiens R-HSA-168249	0.002146353836080957	0.006222881985184357	3.0001570351758793	18.43291912178984	ATF1;NR4A1;JUN;CREBBP;CREB1;IRF1;EP300;FOXO3;FOXO1;NFKB1;NFKB2
Signaling by PDGF Homo sapiens R-HSA-186797	0.002218341451826763	0.006385654322044182	4.16538789428815	25.454666494819286	STAT5B;NR4A1;CREB1;STAT1;STAT3;FOXO3;FOXO1
Downstream signaling events of B Cell Receptor (BCR) Homo sapiens R-HSA-1168372	0.0026711566104017687	0.00763458236873697	5.607577653885539	33.226264238576356	NR4A1;CREB1;FOXO3;FOXO1;NFKB1
Meiotic synapsis Homo sapiens R-HSA-1221632	0.0028362420873038535	0.00804933493791164	11.485532407407407	67.36580967110945	RAD21;SMC1A;LMNB1
TCF dependent signaling in response to WNT Homo sapiens R-HSA-201681	0.0031154204482246785	0.008531969459509592	5.403323097170432	31.184691160324363	CREBBP;HDAC1;MYC;EP300;SOX4
Formation of Senescence-Associated Heterochromatin Foci (SAHF) Homo sapiens R-HSA-2559584	0.003142749862972081	0.008531969459509592	27.334707903780068	157.52054884522119	TP53;LMNB1
PI-3K cascade:FGFR1 Homo sapiens R-HSA-5654689	0.0031756710147058036	0.008531969459509592	7.059054415700268	40.605349235457396	NR4A1;CREB1;FOXO3;FOXO1
PI-3K cascade:FGFR3 Homo sapiens R-HSA-5654710	0.0031756710147058036	0.008531969459509592	7.059054415700268	40.605349235457396	NR4A1;CREB1;FOXO3;FOXO1
PI3K events in ERBB4 signaling Homo sapiens R-HSA-1250342	0.0031756710147058036	0.008531969459509592	7.059054415700268	40.605349235457396	NR4A1;CREB1;FOXO3;FOXO1
PIP3 activates AKT signaling Homo sapiens R-HSA-1257604	0.0031756710147058036	0.008531969459509592	7.059054415700268	40.605349235457396	NR4A1;CREB1;FOXO3;FOXO1
PI-3K cascade:FGFR4 Homo sapiens R-HSA-5654720	0.0031756710147058036	0.008531969459509592	7.059054415700268	40.605349235457396	NR4A1;CREB1;FOXO3;FOXO1
PI-3K cascade:FGFR2 Homo sapiens R-HSA-5654695	0.0031756710147058036	0.008531969459509592	7.059054415700268	40.605349235457396	NR4A1;CREB1;FOXO3;FOXO1
C-type lectin receptors (CLRs) Homo sapiens R-HSA-5621481	0.0032701280170687147	0.00872756020449465	6.99938080495356	40.05693941369951	CREBBP;EP300;NFKB1;NFKB2
S Phase Homo sapiens R-HSA-69242	0.00336648372370801	0.008925611451673211	6.940701754385965	39.51956791413257	MAX;MYC;RAD21;SMC1A
GAB1 signalosome Homo sapiens R-HSA-180292	0.0034647564638648235	0.009063286924963398	6.882992605480644	38.9929304298686	NR4A1;CREB1;FOXO3;FOXO1
PI3K/AKT activation Homo sapiens R-HSA-198203	0.0034647564638648235	0.009063286924963398	6.882992605480644	38.9929304298686	NR4A1;CREB1;FOXO3;FOXO1
Signaling by Wnt Homo sapiens R-HSA-195721	0.0034858795865243836	0.009063286924963398	4.378167206161402	24.776200906055866	CREBBP;CTBP2;HDAC1;MYC;EP300;SOX4
TP53 Regulates Transcription of Genes Involved in G2 Cell Cycle Arrest Homo sapiens R-HSA-6804114	0.003524226323481464	0.00910425133566045	25.625	144.73241770614385	EP300;TP53
Circadian Clock Homo sapiens R-HSA-400253	0.0037678342243935574	0.009671574474080279	10.333854166666667	57.67587439874988	CREBBP;CREB1;EP300
TP53 Regulates Transcription of Genes Involved in Cytochrome C Release Homo sapiens R-HSA-6803204	0.003926182004198906	0.010014249036026324	24.116434202546998	133.6071635204122	CREBBP;TP53
Mitotic G1-G1/S phases Homo sapiens R-HSA-453279	0.004677429936152846	0.011855372731255327	6.305901116427433	33.83120034454041	MAX;HDAC1;MYC;E2F1
RIP-mediated NFkB activation via ZBP1 Homo sapiens R-HSA-1810476	0.004790700886259077	0.012066577857265049	21.57569180683668	115.23746482857183	NFKB1;NFKB2
HIV Infection Homo sapiens R-HSA-162906	0.004951737986111221	0.0123947230335579	4.824982841455045	25.61108928600822	CDK9;POLR2A;GTF2B;SUPT5H;TAF1
Abortive elongation of HIV-1 transcript in the absence of Tat Homo sapiens R-HSA-167242	0.005734661369621297	0.014178334551885784	19.518900343642613	100.74146719605555	POLR2A;SUPT5H
Downregulation of SMAD2/3:SMAD4 transcriptional activity Homo sapiens R-HSA-2173795	0.005734661369621297	0.014178334551885784	19.518900343642613	100.74146719605555	SKI;HDAC1
Signaling by the B Cell Receptor (BCR) Homo sapiens R-HSA-983705	0.006057599001746762	0.014870281928340192	4.589632325494588	23.436690177950315	NR4A1;CREB1;FOXO3;FOXO1;NFKB1
SUMOylation of DNA damage response and repair proteins Homo sapiens R-HSA-3108214	0.00613911562812676	0.014870281928340192	8.606336805555555	43.83271522595941	RAD21;SUMO2;SMC1A
Diseases associated with the TLR signaling cascade Homo sapiens R-HSA-5602358	0.0062359246796265325	0.014870281928340192	18.63074039362699	94.59625050266868	NFKB1;NFKB2
Diseases of Immune System Homo sapiens R-HSA-5260271	0.0062359246796265325	0.014870281928340192	18.63074039362699	94.59625050266868	NFKB1;NFKB2
TRAF6 mediated NF-kB activation Homo sapiens R-HSA-933542	0.0062359246796265325	0.014870281928340192	18.63074039362699	94.59625050266868	NFKB1;NFKB2
Nuclear Events (kinase and transcription factor activation) Homo sapiens R-HSA-198725	0.0062359246796265325	0.014870281928340192	18.63074039362699	94.59625050266868	ATF1;CREB1
RNA Polymerase I Promoter Clearance Homo sapiens R-HSA-73854	0.006368743665969669	0.015097668808151627	8.488013698630137	42.918394000552254	HDAC2;HDAC1;EHMT2
G0 and Early G1 Homo sapiens R-HSA-1538133	0.006756442325411653	0.015923077527139742	17.81981174361273	89.05021124053485	HDAC1;E2F1
RNA Polymerase I Transcription Homo sapiens R-HSA-73864	0.0070881570654884336	0.01660771684530139	8.15172697368421	40.34558610107036	HDAC2;HDAC1;EHMT2
Attenuation phase Homo sapiens R-HSA-3371568	0.007296015367885443	0.016801681104330477	17.076460481099655	84.02347584727124	CREBBP;EP300
ZBP1(DAI) mediated induction of type I IFNs Homo sapiens R-HSA-1606322	0.007296015367885443	0.016801681104330477	17.076460481099655	84.02347584727124	NFKB1;NFKB2
TAK1 activates NFkB by phosphorylation and activation of IKKs complex Homo sapiens R-HSA-445989	0.007296015367885443	0.016801681104330477	17.076460481099655	84.02347584727124	NFKB1;NFKB2
RORA activates gene expression Homo sapiens R-HSA-1368082	0.007854446328915686	0.017683474137167716	16.39257731958763	79.44950281459498	CREBBP;EP300
RNA Pol II CTD phosphorylation and interaction with CE Homo sapiens R-HSA-167160	0.007854446328915686	0.017683474137167716	16.39257731958763	79.44950281459498	POLR2A;SUPT5H
RNA Pol II CTD phosphorylation and interaction with CE Homo sapiens R-HSA-77075	0.007854446328915686	0.017683474137167716	16.39257731958763	79.44950281459498	POLR2A;SUPT5H
Interleukin-6 family signaling Homo sapiens R-HSA-6783589	0.007854446328915686	0.017683474137167716	16.39257731958763	79.44950281459498	STAT1;STAT3
p75 NTR receptor-mediated signalling Homo sapiens R-HSA-193704	0.008119593655374475	0.01817886801731063	7.742578125	37.26870754487646	HDAC2;HDAC1;NFKB1
Role of LAT2/NTAL/LAB on calcium mobilization Homo sapiens R-HSA-2730905	0.008606834298938198	0.019163282997083392	5.261292471685543	25.018491150065127	NR4A1;CREB1;FOXO3;FOXO1
Meiosis Homo sapiens R-HSA-1500620	0.008666702863437143	0.01919055634046796	7.5529725609756095	35.863529253556464	RAD21;SMC1A;LMNB1
Myogenesis Homo sapiens R-HSA-525793	0.009027099356921118	0.019558715273329086	15.176785032455136	71.44508260735158	TCF12;TCF3
CDO in myogenesis Homo sapiens R-HSA-375170	0.009027099356921118	0.019558715273329086	15.176785032455136	71.44508260735158	TCF12;TCF3
Activation of BH3-only proteins Homo sapiens R-HSA-114452	0.009027099356921118	0.019558715273329086	15.176785032455136	71.44508260735158	E2F1;TP53
mRNA Capping Homo sapiens R-HSA-72086	0.009027099356921118	0.019558715273329086	15.176785032455136	71.44508260735158	POLR2A;SUPT5H
Oxidative Stress Induced Senescence Homo sapiens R-HSA-2559580	0.010435676591080486	0.022489720140136022	7.0358664772727275	32.10131600919137	JUN;E2F1;TP53
NGF signalling via TRKA from the plasma membrane Homo sapiens R-HSA-187037	0.01073222975671818	0.023005790382752273	3.424438990182328	15.528132086706908	ATF1;NR4A1;CREB1;STAT3;FOXO3;FOXO1
Signaling by NOTCH2 Homo sapiens R-HSA-1980145	0.010922659437504534	0.0232901150969012	13.657044673539518	61.68772086834981	CREB1;EP300
Formation of the Early Elongation Complex Homo sapiens R-HSA-113418	0.01159017163358524	0.024454655331596083	13.215829730628533	58.91085370390265	POLR2A;SUPT5H
Formation of the HIV-1 Early Elongation Complex Homo sapiens R-HSA-167158	0.01159017163358524	0.024454655331596083	13.215829730628533	58.91085370390265	POLR2A;SUPT5H
HSF1-dependent transactivation Homo sapiens R-HSA-3371571	0.012275199586674555	0.02576513246578045	12.802190721649485	56.3318711837846	CREBBP;EP300
Fc epsilon receptor (FCERI) signaling Homo sapiens R-HSA-2454202	0.013750493622476165	0.02871217062102536	3.2360892279625175	13.87208077000903	NR4A1;JUN;CREB1;FOXO3;FOXO1;NFKB1
Association of TriC/CCT with target proteins during biosynthesis Homo sapiens R-HSA-390471	0.01595661006315771	0.033146978636353394	11.069378657007523	45.80378393112329	STAT3;TP53
HATs acetylate histones Homo sapiens R-HSA-3214847	0.016112809093343648	0.03329980545957688	5.948617788461538	24.55673136458453	CREBBP;WDR5;EP300
Nucleotide Excision Repair Homo sapiens R-HSA-5696398	0.016514828127813498	0.03395650885463694	5.891666666666667	24.176434295422705	POLR2A;SUMO2;EP300
PKMTs methylate histone lysines Homo sapiens R-HSA-3214841	0.0167428723048413	0.03425064740533525	10.777536625067825	44.077782248456614	EHMT2;WDR5
G1/S Transition Homo sapiens R-HSA-69206	0.018179052857320698	0.036819253333004176	5.674311926605505	22.73972157474078	MAX;MYC;E2F1
Intrinsic Pathway for Apoptosis Homo sapiens R-HSA-109606	0.01836394521075394	0.036819253333004176	10.237628865979381	40.92354991919948	E2F1;TP53
Activation of gene expression by SREBF (SREBP) Homo sapiens R-HSA-2426168	0.01836394521075394	0.036819253333004176	10.237628865979381	40.92354991919948	CREBBP;SP1
Deactivation of the beta-catenin transactivating complex Homo sapiens R-HSA-3769402	0.01836394521075394	0.036819253333004176	10.237628865979381	40.92354991919948	HDAC1;SOX4
TP53 Regulates Transcription of Cell Death Genes Homo sapiens R-HSA-5633008	0.019198403941144727	0.03830176627862042	9.98742770932864	39.47958395321927	CREBBP;TP53
RNA Polymerase I, RNA Polymerase III, and Mitochondrial Transcription Homo sapiens R-HSA-504046	0.019933375290844792	0.039461893952927866	5.472345132743363	21.426200154341117	HDAC2;HDAC1;EHMT2
Immune System Homo sapiens R-HSA-168256	0.01997574780743743	0.039461893952927866	1.9734622616169755	7.722624259214317	ATF1;STAT5B;JUN;CREBBP;STAT1;STAT3;FOXO3;FOXO1;NFKB1;NFKB2;NR4A1;CREB1;IRF1;EP300
RMTs methylate histone arginines Homo sapiens R-HSA-3214858	0.0209142959495074	0.04111444520805601	9.52193718532726	36.824400369482454	SMARCB1;WDR5
SUMO is conjugated to E1 (UBA2:SAE1) Homo sapiens R-HSA-3065676	0.024508443549026968	0.04748510937623975	50.75765306122449	188.24681569293375	SUMO2
Regulation of gene expression in endocrine-committed (NEUROG3+) progenitor cells Homo sapiens R-HSA-210746	0.024508443549026968	0.04748510937623975	50.75765306122449	188.24681569293375	NEUROD1
G2 Phase Homo sapiens R-HSA-68911	0.024508443549026968	0.04748510937623975	50.75765306122449	188.24681569293375	E2F1

## Sheet: WikiPathways_2019_Human
Term	P-value	Adjusted P-value	Odds Ratio	Combined Score	Genes
White fat cell differentiation WP4149	2.9175121612025643E-18	7.585531619126667E-16	118.33333333333333	4777.80304974245	CEBPA;STAT5B;EGR2;KLF5;CREB1;EBF1;NR1H3;PPARG;NR2F2;KLF4;FOXO1
Pathways Affected in Adenoid Cystic Carcinoma WP3651	1.7714768529231412E-14	2.3029199088000837E-12	45.942129629629626	1454.7289459939184	CEBPA;CREBBP;MYCN;MAX;MYC;JMJD1C;EP300;BCOR;SMC1A;FOXO3;TP53
Adipogenesis WP236	7.721745926959572E-14	6.1314023332018585E-12	25.560723514211887	771.7332190798649	STAT5B;CEBPA;EGR2;STAT1;STAT3;EBF1;NR1H3;FOXO1;CREB1;KLF5;SP1;E2F1;PPARG
TGF-beta Signaling Pathway WP366	9.432926666464398E-14	6.1314023332018585E-12	25.12859097127223	753.6563208788856	KLF10;YAP1;JUN;CREBBP;HDAC1;ETS1;SKI;ZEB1;SP1;MYC;EP300;TP53;ATF3
Integrated Breast Cancer Pathway WP1984	5.43378304484853E-13	2.8255671833212355E-11	21.64804516346478	611.361807533037	ATF1;JUN;MAX;HDAC1;STAT1;FOXO1;NFKB1;CREB1;SP1;MYC;E2F1;EP300;TP53
Initiation of transcription and translation elongation at the HIV-1 LTR WP3414	2.5759470518806832E-12	1.1162437224816295E-10	72.80952380952381	1942.9078621640099	CDK9;HDAC2;CREBBP;HDAC1;SP1;EP300;SUPT5H;NFKB1
Prion disease pathway WP3995	3.3865178620477798E-12	1.257849491617747E-10	69.89362637362638	1845.975865993305	SPI1;CREB1;RAD21;STAT3;EBF1;EP300;CTCF;NFKB1
Sudden Infant Death Syndrome (SIDS) Susceptibility Pathways WP706	1.9816235931215173E-11	6.440276677644932E-10	18.663202645252717	459.94566185401044	NEUROD1;JUN;CREBBP;CREB1;SP1;HDAC1;MAZ;EP300;TCF3;CTCF;NFKB1;NFKB2
Energy Metabolism WP1541	7.247391537396922E-11	2.0936908885813332E-9	44.77204846435615	1045.3285827149411	CREB1;HDAC1;EP300;PPARG;NRF1;FOXO3;FOXO1;GABPA
VEGFA-VEGFR2 Signaling Pathway WP3888	2.0593025569760973E-9	5.354186648137853E-8	12.116379310344827	242.33847248346578	TEAD4;NR4A1;JUN;CREB1;HDAC1;STAT1;STAT3;ERG;FOXO3;ETS1;FOXO1;NFKB1
Circadian rhythm related genes WP3594	4.680888492526762E-9	1.1063918255063256E-7	12.967763157894737	248.71881717901567	KLF10;JUN;HDAC2;CREB1;HDAC1;KLF9;EP300;ARNT;NR1H3;PPARG;TP53
TGF-beta Receptor Signaling WP560	8.596445461590558E-9	1.862563183344621E-7	32.141073080481036	596.921342748405	SKI;JUN;CREBBP;STAT1;STAT3;EP300;NFKB1
Androgen receptor signaling pathway WP138	1.5009761986161646E-8	3.0019523972323293E-7	21.24792280889842	382.77208758523113	JUN;CREBBP;CREB1;HDAC1;SP1;STAT3;EP300;FOXO1
MECP2 and Associated Rett Syndrome WP3584	2.3114739786325214E-8	4.2927373888889685E-7	27.454940711462452	482.7346035169408	CREB1;HDAC1;SP1;TET2;E2F1;CTCF;TAF1
Nuclear Receptors WP170	3.064581883275554E-8	5.31194193101096E-7	40.05846774193548	693.0423209490565	NR4A1;NR1H2;NR1H3;PPARG;PGR;NR2F2
AGE/RAGE pathway WP2324	3.6018600797032544E-8	5.853022629517788E-7	25.58843036109064	438.5660020776572	STAT5B;JUN;STAT1;SP1;STAT3;FOXO1;NFKB1
IL-5 Signaling Pathway WP127	4.2270748782127414E-8	6.424390013330289E-7	37.69829222011385	640.0857314753796	STAT5B;JUN;STAT1;MYC;STAT3;FOXO3
RAC1/PAK1/p38/MMP2 Pathway WP3303	4.447654624613277E-8	6.424390013330289E-7	24.74697077690663	418.92424036581684	YAP1;STAT5B;MYC;STAT3;TP53;FOXO1;NFKB1
IL-2 Signaling Pathway WP49	5.7311219013110095E-8	7.842587864951908E-7	35.60035842293907	593.6277686160809	STAT5B;JUN;STAT1;MYC;STAT3;FOXO3
Leptin signaling pathway WP2034	9.711885290171572E-8	1.2024238930688613E-6	21.868935097668558	353.1249187872571	STAT5B;CREB1;STAT1;SP1;STAT3;FOXO1;NFKB1
Prolactin Signaling Pathway WP2037	9.711885290171572E-8	1.2024238930688613E-6	21.868935097668558	353.1249187872571	STAT5B;JUN;STAT1;MYC;IRF1;STAT3;NFKB1
EGF/EGFR Signaling Pathway WP437	1.1151117079458097E-7	1.2558073638580813E-6	12.90718954248366	206.63301813271315	ATF1;STAT5B;JUN;CREB1;SP1;STAT1;STAT3;E2F1;FOXO1
Thymic Stromal LymphoPoietin (TSLP) Signaling Pathway WP2203	1.1499492277111721E-7	1.2558073638580813E-6	31.25098347757671	499.34002248177956	STAT5B;STAT1;MYC;STAT3;NFKB1;NFKB2
Mammary gland development pathway - Involution (Stage 4 of 4) WP2815	1.1592067974074595E-7	1.2558073638580813E-6	139.6140350877193	2229.686356039154	MYC;STAT3;E2F1;TP53
Cell Cycle WP179	1.4408973323082085E-7	1.498533225600537E-6	15.532967032967033	244.6881826043735	HDAC2;HDAC1;MYC;RAD21;E2F1;EP300;SMC1A;TP53
NAD metabolism, sirtuins and aging WP3630	1.8147041629790164E-7	1.8147041629790164E-6	119.66315789473684	1857.432261559373	PPARG;FOXO3;NFKB1;FOXO1
IL-4 Signaling Pathway WP395	2.689875244890808E-7	2.590250235820778E-6	26.684139784946236	403.693699452716	CEBPA;STAT5B;STAT1;STAT3;EP300;NFKB1
Hematopoietic Stem Cell Differentiation WP2849	3.007238990982059E-7	2.7924362059119124E-6	26.138248847926267	392.51999814842867	NFE2;SPI1;GATA1;FLI1;RUNX1;KLF1
Transcriptional cascade regulating adipogenesis WP4211	3.9020967084909454E-7	3.3818171473588193E-6	93.06198830409356	1373.276826568605	CEBPA;EGR2;KLF5;PPARG
ncRNAs involved in STAT3 signaling in hepatocellular carcinoma WP4337	3.9020967084909454E-7	3.3818171473588193E-6	93.06198830409356	1373.276826568605	ZEB1;STAT3;NFKB1;SOX4
Endoderm Differentiation WP2853	4.985478129490523E-7	4.1813687537662454E-6	13.066512434933488	189.6155620124367	FOXA1;CTBP2;STAT1;SP4;TBX21;GRHL2;FOXO1;FOXA2
B Cell Receptor Signaling Pathway WP23	5.244096557976997E-7	4.26082845335631E-6	16.74842995169082	242.1989228020431	JUN;CREB1;MAX;MYC;ETS1;FOXO1;NFKB1
Notch Signaling Pathway WP61	5.623833835026832E-7	4.430899385172656E-6	23.27976539589443	335.0210137443009	HDAC2;HDAC1;MYC;STAT3;EP300;NFKB1
Brain-Derived Neurotrophic Factor (BDNF) signaling pathway WP2380	5.853842781116903E-7	4.4764680090893964E-6	12.776341305753071	183.35323983454327	STAT5B;EGR2;JUN;CREB1;STAT1;STAT3;FOXO3;NFKB1
Mesodermal Commitment Pathway WP2857	6.848410554462294E-7	4.9898950162737195E-6	12.498695549055261	177.40747278832845	FOXA1;YAP1;KLF5;TRIM28;CTBP2;KLF4;GRHL2;FOXA2
Neural Crest Differentiation WP2064	6.909085407148227E-7	4.9898950162737195E-6	16.032493061979647	227.42505655660406	HDAC2;CTBP2;HDAC1;MYC;ETS1;NFKB1;NFKB2
miRNAs involved in DNA damage response WP1545	7.393065295996654E-7	5.195126964754405E-6	76.13397129186603	1074.8253909754442	CREB1;MYC;E2F1;TP53
Oncostatin M Signaling Pathway WP2374	8.233680217148917E-7	5.633570674891365E-6	21.69710224166211	303.9734204697009	STAT5B;CREB1;STAT1;STAT3;TP53;NFKB1
Human Thyroid Stimulating Hormone (TSH) signaling pathway WP2032	9.021038770383223E-7	6.014025846922149E-6	21.33440860215054	296.94373759193326	JUN;CREB1;STAT1;MYC;STAT3;E2F1
IL-9 Signaling Pathway WP22	1.2792895935197354E-6	8.31538235787828E-6	64.41457489878543	874.0546129611943	CDK9;STAT5B;STAT1;STAT3
Non-genomic actions of 1,25 dihydroxyvitamin D3 WP4341	1.3939290575692808E-6	8.83955012117105E-6	19.68833746898263	265.46541713663566	JUN;STAT1;SP1;ETS1;NFKB1;NFKB2
Mitochondrial Gene Expression WP391	2.0676451094097657E-6	1.2799707820155694E-5	55.82035087719298	730.6381673145381	CREB1;SP1;NRF1;GABPA
IL-6 signaling pathway WP364	2.2254023151187074E-6	1.345592097513637E-5	27.803751399776036	361.88175164987877	CREBBP;HDAC1;STAT1;IRF1;STAT3
Integrated Cancer Pathway WP1971	2.500904538634497E-6	1.47780722737493E-5	27.089470812875067	349.4232393712718	ATF1;STAT1;MYC;E2F1;TP53
Hematopoietic Stem Cell Gene Regulation by GABP alpha/beta Complex WP3657	2.574757451517255E-6	1.4876376386544139E-5	52.328947368421055	673.4607436497288	CREBBP;EP300;FOXO3;GABPA
Aryl Hydrocarbon Receptor WP2586	3.132023049149876E-6	1.7702738973455823E-5	25.765438505448884	326.54682409639867	MYC;E2F1;EP300;ARNT;NFKB1
Transcription factor regulation in adipogenesis WP3599	3.857961222725306E-6	2.1341913146991057E-5	46.509941520467834	579.7637085497724	CEBPA;CREB1;PPARG;FOXO1
Nuclear Receptors Meta-Pathway WP2882	4.113072473313325E-6	2.227914256378051E-5	7.124104578015345	88.34844483660649	JUN;SP1;MYC;STAT3;EP300;ARNT;NR1H3;SMC1A;FOXO1;NFKB2
Hepatitis C and Hepatocellular Carcinoma WP3646	4.306183386657277E-6	2.2849136337365142E-5	24.00507736943907	296.593738938839	JUN;MYC;STAT3;TP53;NFKB1
Estrogen signaling pathway WP712	4.6524614549927125E-6	2.4192799565962106E-5	44.05983379501385	540.9716680276026	JUN;CREB1;SP1;NFKB1
Copper homeostasis WP3286	5.800583209436626E-6	2.957160067555927E-5	22.469443186962426	270.92648170763835	JUN;SP1;FOXO3;TP53;FOXO1
IL-7 Signaling Pathway WP205	6.596089736331308E-6	3.298044868165654E-5	39.85964912280702	475.4870916253907	STAT5B;STAT1;MYC;STAT3
DNA IR-Double Strand Breaks (DSBs) and cellular response via ATM WP3959	7.673641442383852E-6	3.6947162500366696E-5	21.118085106382978	248.7228783448129	YAP1;TRIM28;E2F1;SMC1A;TP53
RANKL/RANK (Receptor activator of NFKB (ligand)) Signaling Pathway WP2018	7.673641442383852E-6	3.6947162500366696E-5	21.118085106382978	248.7228783448129	JUN;SPI1;STAT1;NFKB1;NFKB2
Kit receptor signaling pathway WP304	1.0871997163476116E-5	5.1394895681887094E-5	19.549842395587078	223.4414074651456	STAT5B;STAT1;STAT3;EP300;FOXO3
Breast cancer pathway WP4262	1.1519992645472238E-5	5.2841166553620374E-5	10.22463768115942	116.26871630077578	JUN;SP1;MYC;E2F1;PGR;TP53;NFKB2
Wnt Signaling Pathway and Pluripotency WP399	1.158440959060139E-5	5.2841166553620374E-5	13.30981182795699	151.27732961809238	JUN;CREBBP;CTBP2;MYC;EP300;TP53
PDGFR-beta pathway WP3972	1.2197853608612929E-5	5.468003341792002E-5	33.47536842105263	378.7487057508999	STAT5B;JUN;STAT1;STAT3
Myometrial Relaxation and Contraction Pathways WP289	1.2530517121183541E-5	5.521922799165628E-5	10.08637292092209	113.84835602183746	ATF1;JUN;CREB1;SP1;ATF3;NFKB1;GABPA
DNA Damage Response (only ATM dependent) WP710	1.784941086626325E-5	7.734744708714075E-5	12.281017369727047	134.27499532774735	JUN;MYC;FOXO3;TP53;NFKB1;NFKB2
Mammary gland development pathway - Pregnancy and lactation (Stage 3 of 4) WP2817	1.8259003214366218E-5	7.782525960221667E-5	29.88421052631579	326.0622063408957	CEBPA;MYC;PGR;USF2
Non-small cell lung cancer WP4255	1.888391391591163E-5	7.919060674414555E-5	17.300313916986397	188.17897650771707	STAT5B;STAT3;E2F1;FOXO3;TP53
miRNA regulation of prostate cancer signaling pathways WP3981	2.069880676668703E-5	8.542364697362902E-5	28.852268602540835	311.18425328939645	CREBBP;TP53;FOXO1;NFKB1
DNA Damage Response WP707	2.1854956327136094E-5	8.878576007899039E-5	16.749408983451538	179.73929512065823	CREB1;MYC;E2F1;SMC1A;TP53
p38 MAPK Signaling Pathway WP400	2.3369824639037902E-5	9.347929855615161E-5	27.889122807017543	297.41141598400975	CREB1;MAX;STAT1;MYC
miRNA Regulation of DNA Damage Response WP1530	2.6979181264141992E-5	1.0628162316177149E-4	15.985654416505481	168.17619893586624	CREB1;MYC;E2F1;SMC1A;TP53
Estrogen Receptor Pathway WP2881	3.245643490821255E-5	1.258128715222139E-4	62.159375	642.4551717332324	JUN;SP1;STAT3
The effect of progerin on the involved genes in Hutchinson-Gilford Progeria Syndrome WP4320	3.290490485965594E-5	1.258128715222139E-4	25.349920255183413	261.6590586580854	HDAC2;HDAC1;E2F1;TP53
ATM Signaling Pathway WP2516	4.5017312340260724E-5	1.696304522966346E-4	23.23391812865497	232.5358197753936	JUN;CREB1;SMC1A;TP53
DNA IR-damage and cellular response via ATR WP4016	4.80943639981716E-5	1.7863620913606594E-4	14.060992907801419	139.79925041047184	TRIM28;SP1;E2F1;SMC1A;TP53
Signaling Pathways in Glioblastoma WP2261	5.416250266133722E-5	1.9759501127191155E-4	13.69439071566731	134.5271446616549	E2F1;EP300;FOXO3;TP53;FOXO1
TNF related weak inducer of apoptosis (TWEAK) Signaling Pathway WP2036	5.4718618506067814E-5	1.9759501127191155E-4	22.00886426592798	215.97973145323158	JUN;HDAC1;NFKB1;NFKB2
Apoptosis WP254	6.080578609782267E-5	2.1656855322512185E-4	13.346350659843791	129.56404470147257	JUN;MYC;IRF1;TP53;NFKB1
Ectoderm Differentiation WP2858	6.406356779860566E-5	2.2309578996757338E-4	9.662267839687194	93.29532883353508	MYC;NR2F2;TCF3;BCOR;ZBTB2;FOXA2
Pathways in clear cell renal cell carcinoma WP4018	6.435455479833847E-5	2.2309578996757338E-4	13.178856382978724	127.19049832884586	CREBBP;ZEB1;STAT3;EP300;ARNT
Interleukin-11 Signaling Pathway WP2332	6.586279492153241E-5	2.2532008788945298E-4	20.906315789473684	201.2846880743583	ATF1;CREB1;STAT1;STAT3
Retinoblastoma Gene in Cancer WP2446	7.192989084579653E-5	2.4005021357751942E-4	12.856123508043591	122.64508682920614	HDAC1;MYC;E2F1;SMC1A;TP53
Notch Signaling WP268	7.201506407325582E-5	2.4005021357751942E-4	20.395378690629013	194.54407786248083	HDAC2;CREBBP;CTBP2;HDAC1
Pancreatic adenocarcinoma pathway WP4263	8.017454474574361E-5	2.6386559030244734E-4	12.548758865248226	118.35116583800242	STAT1;STAT3;E2F1;TP53;NFKB1
ErbB Signaling Pathway WP673	8.91282446077414E-5	2.8966679497515954E-4	12.255690252350322	114.28963394006702	STAT5B;JUN;MYC;TP53;FOXO1
Transcription co-factors SKI and SKIL protein partners WP4533	9.095268199124112E-5	2.9194688046571223E-4	41.42916666666667	385.50548704840793	TEAD4;SKI;HDAC1
Corticotropin-releasing hormone signaling pathway WP2355	9.883188015420392E-5	3.1336937609869535E-4	11.975942940038685	110.44322759951739	NR4A1;CREB1;TRIM28;SP1;NFKB1
LncRNA involvement in canonical Wnt signaling and colorectal cancer WP4258	1.0397801669913024E-4	3.257142691779983E-4	11.840784126225197	108.5957512204659	JUN;CTBP2;MYC;TCF3;ATF3
MAPK Signaling Pathway WP382	2.2265244794993541E-4	6.891623388926572E-4	6.25950518464617	52.641803461192104	NR4A1;JUN;MAX;MYC;TP53;NFKB1;NFKB2
EPO Receptor Signaling WP581	2.8159031963469633E-4	8.613350953531887E-4	27.008152173913043	220.79319187429456	STAT5B;STAT1;STAT3
G1 to S cell cycle control WP45	2.8579612201485563E-4	8.640347874867728E-4	13.923508771929825	113.61905990371194	CREB1;MYC;E2F1;TP53
Spinal Cord Injury WP2431	3.0184708634962753E-4	9.020717523092317E-4	9.314630013180192	75.50057193894122	NR4A1;MYC;E2F1;FOXO3;TP53
Metastatic brain tumor WP2249	3.5915145937275825E-4	0.001049206510527159	102.5618556701031	813.4966772432183	MYC;TP53
let-7 inhibition of ES cell reprogramming WP3299	3.5915145937275825E-4	0.001049206510527159	102.5618556701031	813.4966772432183	MYC;KLF4
Sterol Regulatory Element-Binding Proteins (SREBP) signalling WP1982	3.815801788378721E-4	0.0011023427388649639	12.849230769230768	101.13873111034363	CREB1;SP1;NR1H2;PPARG
Dopaminergic Neurogenesis WP2855	4.334480544214506E-4	0.001238423012632716	23.002314814814813	178.12391305752828	NEUROD1;STAT3;FOXA2
Ebola Virus Pathway on Host WP4217	4.549465257702699E-4	0.001285718442394241	8.483613589567605	65.28421186264752	CREBBP;STAT1;EP300;NFKB1;NFKB2
Ethanol effects on histone modifications WP3996	4.781709116554196E-4	0.0013226003939405223	22.1796875	169.57573972762742	HDAC2;HDAC1;EHMT2
IL17 signaling pathway WP2112	4.781709116554196E-4	0.0013226003939405223	22.1796875	169.57573972762742	SP1;STAT3;NFKB1
Constitutive Androstane Receptor Pathway WP2875	5.257483012116406E-4	0.0014388900875265955	21.413793103448278	161.6888700758816	SP1;SMC1A;FOXO1
Type 2 papillary renal cell carcinoma WP4241	6.297587560245082E-4	0.0017055966308997098	20.030241935483872	147.62636309589882	CREBBP;EP300;ARNT
ApoE and miR-146 in inflammation and atherosclerosis WP3926	6.660973651765811E-4	0.0017671970912848068	68.36769759450172	500.0464475569458	SPI1;NFKB2
TFs Regulate miRNAs related to cardiac hypertrophy WP1559	6.660973651765811E-4	0.0017671970912848068	68.36769759450172	500.0464475569458	STAT3;NFKB1
Ciliary landscape WP4352	7.19860137595015E-4	0.0018905417755020596	6.049462365591398	43.776653823431154	YAP1;CREBBP;HDAC2;CTBP2;HDAC1;NFKB1
Viral Acute Myocarditis WP4298	8.047871293697965E-4	0.0020620957817734705	10.432105263157895	74.32804845219222	CREB1;STAT1;STAT3;NFKB2
Type II interferon signaling (IFNG) WP619	8.08976037464977E-4	0.0020620957817734705	18.26011029411765	130.00726069671498	SPI1;STAT1;IRF1
miRNAs involvement in the immune response in sepsis WP4329	8.08976037464977E-4	0.0020620957817734705	18.26011029411765	130.00726069671498	IRF1;NFKB1;NFKB2
ncRNAs involved in Wnt signaling in hepatocellular carcinoma WP4336	8.79073573514395E-4	0.002219020671007211	10.176636713735558	71.60934893597509	JUN;CTBP2;MYC;KLF4
Hair Follicle Development: Cytodifferentiation (Part 3 of 3) WP2840	9.179722530741761E-4	0.00229493063268544	10.053519340519975	70.30771305853408	JUN;EGR2;TCF3;NFKB1
PDGF Pathway WP2526	9.447195722076117E-4	0.002339305607371229	17.24392361111111	120.09741705099447	JUN;STAT1;STAT3
Bladder Cancer WP2828	0.0010176687967361172	0.0024961687467112306	16.777027027027028	115.59775546680237	MYC;E2F1;TP53
TNF alpha Signaling Pathway WP231	0.0011308225144808495	0.002747793025841316	9.479904306220096	64.31934974557537	JUN;CREBBP;NFKB1;NFKB2
Chemokine signaling pathway WP3929	0.001341403902254505	0.0032293056906126973	6.604442660243543	43.68203819240435	STAT5B;STAT1;STAT3;FOXO3;NFKB1
ATM Signaling Network in Development and Disease WP3878	0.0014356981318496278	0.0034246010484486533	14.776041666666666	96.72550612390069	TRIM28;SMC1A;NFKB1
Aryl Hydrocarbon Receptor Pathway WP2873	0.0015303815756953004	0.0035846775646916945	14.431686046511627	93.54962627504459	JUN;EP300;ARNT
Selenium Metabolism and Selenoproteins WP28	0.0015303815756953004	0.0035846775646916945	14.431686046511627	93.54962627504459	JUN;SP1;NFKB1
IL-10 Anti-inflammatory Signaling Pathway WP4495	0.0015499404872296638	0.0035980761310688628	41.01237113402062	265.33112403993107	STAT1;STAT3
Toll-like Receptor Signaling Pathway WP75	0.0017167716298229672	0.003948549095390829	8.421903242955874	53.62486630614482	JUN;STAT1;NFKB1;NFKB2
Rett syndrome causing genes WP4312	0.0017312869110559788	0.003948549095390829	13.78888888888889	87.68203135919813	KDM5B;HDAC1;SMC1A
Development of pulmonary dendritic cells and macrophage subsets WP3892	0.0018258482536678334	0.004025076360092646	37.28209934395501	235.09012915025681	SPI1;STAT3
MFAP5-mediated ovarian cancer cell motility and invasiveness WP3301	0.0018258482536678334	0.004025076360092646	37.28209934395501	235.09012915025681	JUN;CREB1
Mammary gland development pathway - Puberty (Stage 2 of 4) WP2814	0.0018258482536678334	0.004025076360092646	37.28209934395501	235.09012915025681	MYC;PGR
IL-3 Signaling Pathway WP286	0.00183761907410643	0.004025076360092646	13.488451086956522	84.9675912217824	STAT5B;JUN;STAT3
Senescence and Autophagy in Cancer WP615	0.0018422464878885573	0.004025076360092646	8.254299114121938	51.97541919246721	JUN;IRF1;E2F1;TP53
H19 action Rb-E2F1 signaling and CDK-Beta-catenin activity WP3969	0.0021232979505485697	0.004600478892855234	34.17353951890034	210.3307802944267	E2F1;SOX4
Wnt Signaling Pathway WP363	0.002180772665728393	0.004685957794127125	12.660714285714286	77.58581975162039	MYC;PPARG;TCF3
Apoptosis-related network due to altered Notch3 in ovarian cancer WP2864	0.0023033809474062887	0.004908844642013402	12.406875	75.35163247123117	HDAC1;ETS1;NFKB1
Interferon type I signaling pathways WP585	0.0024301842046651166	0.005120477571928754	12.16299019607843	73.21862510371197	CREB1;STAT1;STAT3
Regulation of sister chromatid separation at the metaphase-anaphase transition WP4240	0.0024420739189198676	0.005120477571928754	31.54321966693101	189.7295527731584	RAD21;SMC1A
MET in type 1 papillary renal cell carcinoma WP4205	0.00312878159539774	0.00648503939978366	11.07421875	63.866255600774856	JUN;STAT3;ETS1
miR-509-3p alteration of YAP1/ECM axis WP3967	0.003142749862972081	0.00648503939978366	27.334707903780068	157.52054884522119	YAP1;TEAD4
Simplified Depiction of MYD88 Distinct Input-Output Pathway WP3877	0.003524226323481464	0.007214951528387249	25.625	144.73241770614385	JUN;NFKB1
Endometrial cancer WP4155	0.0037678342243935574	0.0076534132682994135	10.333854166666667	57.67587439874988	MYC;FOXO3;TP53
Cell Differentiation - Index expanded WP2023	0.003926182004198906	0.007792422298410043	24.116434202546998	133.6071635204122	STAT3;KLF4
Serotonin Receptor 4/6/7 and NR3C Signaling WP734	0.003926182004198906	0.007792422298410043	24.116434202546998	133.6071635204122	ATF1;CREB1
TP53 Network WP1742	0.003926182004198906	0.007792422298410043	24.116434202546998	133.6071635204122	MYC;TP53
Folate Metabolism WP176	0.004295636153672883	0.008437211472198858	9.840277777777779	53.631045228710484	TP53;NFKB1;NFKB2
Hypertrophy Model WP516	0.004348408989517873	0.008437211472198858	22.77548682703322	123.85185041479878	ZEB1;ATF3
Imatinib and Chronic Myeloid Leukemia WP3640	0.004348408989517873	0.008437211472198858	22.77548682703322	123.85185041479878	MYC;FOXO3
Regulation of toll-like receptor signaling pathway WP1449	0.005051904199144886	0.009729593272427187	6.164834307992202	32.59958240430221	JUN;STAT1;NFKB1;NFKB2
Chromosomal and microsatellite instability in colorectal cancer WP4216	0.005694954364415313	0.010804434464503894	8.853125	45.754496600099905	JUN;MYC;TP53
EBV LMP1 signaling WP262	0.005734661369621297	0.010804434464503894	19.518900343642613	100.74146719605555	NFKB1;NFKB2
The human immune response to tuberculosis WP4197	0.005734661369621297	0.010804434464503894	19.518900343642613	100.74146719605555	STAT1;IRF1
Angiogenesis WP1539	0.0062359246796265325	0.011664319544625167	18.63074039362699	94.59625050266868	CREBBP;ARNT
Differentiation of white and brown adipocyte WP2895	0.006756442325411653	0.012458687975936382	17.81981174361273	89.05021124053485	CEBPA;PPARG
Physiological and Pathological Hypertrophy of the Heart WP1528	0.006756442325411653	0.012458687975936382	17.81981174361273	89.05021124053485	JUN;STAT3
PPAR Alpha Pathway WP2878	0.007296015367885443	0.013265482487064441	17.076460481099655	84.02347584727124	MYC;NR1H3
Wnt/beta-catenin Signaling Pathway in Leukemia WP3658	0.007296015367885443	0.013265482487064441	17.076460481099655	84.02347584727124	MYC;TCF3
Nonalcoholic fatty liver disease WP4396	0.007391232462686639	0.013345280835406433	5.507145346810735	27.026099818755092	CEBPA;JUN;NR1H3;NFKB1
Follicle Stimulating Hormone (FSH) signaling pathway WP2035	0.007854446328915686	0.014083834796676402	16.39257731958763	79.44950281459498	CREB1;FOXO1
MicroRNAs in cardiomyocyte hypertrophy WP1544	0.00839051322204258	0.014942009847473086	7.646604938271605	36.555769347084976	CDK9;STAT3;NFKB1
PI3K-AKT-mTOR signaling pathway and therapeutic opportunities WP3844	0.009640933700327758	0.017051991578811	14.6340206185567	67.92727962001706	FOXO3;FOXO1
T-Cell antigen Receptor (TCR) Signaling Pathway WP69	0.010127436038827093	0.01779144168983138	7.117097701149425	32.68532171325279	JUN;CREB1;NFKB1
Gastric Cancer Network 2 WP2363	0.01027285049437953	0.017806274190257855	14.128688233202986	64.68467733221605	MYC;TP53
Toll-like Receptor Signaling WP3858	0.01027285049437953	0.017806274190257855	14.128688233202986	64.68467733221605	NFKB1;NFKB2
Apoptosis Modulation and Signaling WP1772	0.010435676591080486	0.017968714660138586	7.0358664772727275	32.10131600919137	JUN;TP53;NFKB1
Nuclear Receptors in Lipid Metabolism and Toxicity WP299	0.01159017163358524	0.019567822238520532	13.215829730628533	58.91085370390265	NR1H3;PPARG
Oxidative Stress WP408	0.01159017163358524	0.019567822238520532	13.215829730628533	58.91085370390265	SP1;NFKB1
Signal transduction through IL1R WP4496	0.01159017163358524	0.019567822238520532	13.215829730628533	58.91085370390265	JUN;NFKB1
Signaling of Hepatocyte Growth Factor Receptor WP313	0.012275199586674555	0.020590657371196027	12.802190721649485	56.3318711837846	JUN;STAT3
Vitamin D Receptor Pathway WP2877	0.012779509003931325	0.021299181673218877	4.665405085748078	20.34075678395178	CEBPA;MYC;KLF4;FOXO1
Photodynamic therapy-induced NF-kB survival signaling WP3617	0.012977557188192254	0.021491495980445773	12.41362074351765	53.9313946964376	NFKB1;NFKB2
Melatonin metabolism and effects WP3298	0.014433523800833282	0.023601988605136185	11.703092783505154	49.60006815590735	FOXO1;NFKB1
Photodynamic therapy-induced HIF-1 survival signaling WP3614	0.014433523800833282	0.023601988605136185	11.703092783505154	49.60006815590735	ARNT;TP53
Thermogenesis WP4321	0.016514828127813498	0.026836595707696934	5.891666666666667	24.176434295422705	SMARCB1;CREB1;PPARG
Fas Ligand (FasL) pathway and Stress induction of Heat Shock Proteins (HSP) regulation WP314	0.01836394521075394	0.029656060588795184	10.237628865979381	40.92354991919948	JUN;LMNB1
Eukaryotic Transcription Initiation WP405	0.019198403941144727	0.030812253238874255	9.98742770932864	39.47958395321927	POLR2A;GTF2B
Wnt Signaling WP428	0.019486332718260266	0.031082493906427415	5.521484375	21.74383706957151	JUN;CTBP2;MYC
NO/cGMP/PKG mediated Neuroprotection WP4008	0.022691675852434673	0.035974608058737895	9.097823596792669	34.44215049702341	CREB1;NFKB1
TCA Cycle Nutrient Utilization and Invasiveness of Ovarian Cancer WP2868	0.024508443549026968	0.03841920982660028	50.75765306122449	188.24681569293375	STAT3
Structural Pathway of Interleukin 1 (IL-1) WP2637	0.024529187812367872	0.03841920982660028	8.709804781750384	32.29501138894197	MYC;NFKB1
mRNA Processing WP411	0.024714621325182692	0.03847785356016467	5.024898373983739	18.593934223479682	POLR2A;SUPT5H;SMC1A
Photodynamic therapy-induced AP-1 survival signaling. WP3611	0.025470075176232815	0.039184731040358176	8.527920962199312	31.299610767204847	JUN;TP53
Vitamin B12 Metabolism WP1533	0.025470075176232815	0.039184731040358176	8.527920962199312	31.299610767204847	NFKB1;NFKB2
PI3K-Akt Signaling Pathway WP4172	0.026969893352292395	0.04124807218585896	3.106700539853922	11.224614977010791	CREB1;MYC;FOXO3;TP53;NFKB1
Angiopoietin Like Protein 8 Regulatory Pathway WP3915	0.027854575326637272	0.042351985876758425	4.7897286821705425	17.150859495204667	NR1H3;FOXO3;FOXO1
LncRNA-mediated mechanisms of therapeutic resistance WP3672	0.02933831724779352	0.044092268696105864	40.60408163265306	143.28615448776515	TP53
Somatroph axis (GH) and its relationship to dietary restriction and aging WP4186	0.02933831724779352	0.044092268696105864	40.60408163265306	143.28615448776515	FOXO1
Cardiac Hypertrophic Response WP2795	0.03038926072393593	0.04514975878984767	7.721454969850224	26.976184688218552	CDK9;NFKB1
IL-1 signaling pathway WP195	0.03038926072393593	0.04514975878984767	7.721454969850224	26.976184688218552	JUN;NFKB1
Preimplantation Embryo WP3527	0.03350678423980879	0.049498658536081167	7.306701030927835	24.81361037629984	TEAD4;KLF4
